# Supplementary material for: Tone classification of online medical services based on 1DCNN-BiLSTM
Source: PeerJ journal article supplement (doi:10.7717/peerj-cs.2325), 2024-09-23
Supplement: Code.zip [file Code.zip]

## Sheet: Sheet1
Unnamed: 0	wav_id	new_label	name	file_path_wav	is_validation	label_score	label_predict_list	feature1	feature2	feature3	feature4	feature5	feature6
0	135	yl	cy_693072784_2703029380.wav	D:\hc--document\all text\P8_medical\thesis_dataset\use_wav_raw\693072784\2703029380.wav	0	5	[0.9979432821, 0.9126496315, 0.6024438739, 0.6325234175, 0.2845264971, 1.5658999681]	0.997943	0.91265	0.602444	0.632523	0.284526	1.5659
1	855	yl	cy_711596104_3104356334.wav	D:\hc--document\all text\P8_medical\thesis_dataset\use_wav_raw\711596104\3104356334.wav	0	5	[0.2008956224, 1.9385665655, 1.7089885473, 0.1081077382, 0.2253057063, 0.5462654829]	0.200896	1.93857	1.70899	0.108108	0.225306	0.546265
2	997	general	cy_681139528_2445938472.wav	D:\hc--document\all text\P8_medical\thesis_dataset\use_wav_raw\681139528\2445938472.wav	0	0	[1.1850548983, 0.0502813384, 0.4876950681, 0.258304745, 0.7002900243, 0.765645206]	1.18505	0.0502813	0.487695	0.258305	0.70029	0.765645
3	1676	yl	cy_688002399_2594039738.wav	D:\hc--document\all text\P8_medical\thesis_dataset\use_wav_raw\688002399\2594039738.wav	0	5	[0.9195964336, 0.3552391231, 0.3278161883, 1.0016283989, 0.3334485292, 1.2811800241]	0.919596	0.355239	0.327816	1.00163	0.333449	1.28118
4	1176	yl	cy_723236735_3365571087.wav	D:\hc--document\all text\P8_medical\thesis_dataset\use_wav_raw\723236735\3365571087.wav	0	5	[0.2306497842, 2.0060470104, 1.7177844048, 0.0804561302, 0.271635443, 0.3691626787]	0.23065	2.00605	1.71778	0.0804561	0.271635	0.369163
5	1286	wz	cy_628170444_1946421452.wav	D:\hc--document\all text\P8_medical\thesis_dataset\use_wav_raw\628170444\1946421452.wav	0	3	[0.9494379163, 0.0531124845, 0.2343399227, 1.3803445101, 1.1181783676, 0.2339847982]	0.949438	0.0531125	0.23434	1.38034	1.11818	0.233985
6	1179	rouhe	cy_654183249_2083202798.wav	D:\hc--document\all text\P8_medical\thesis_dataset\use_wav_raw\654183249\2083202798.wav	0	4	[1.2541410923, 0.0, 0.2255636305, 0.8291568756, 0.9402638078, 0.5137034655]	1.25414	0	0.225564	0.829157	0.940264	0.513703
7	1330	rouhe	cy_720434905_3300773574.wav	D:\hc--document\all text\P8_medical\thesis_dataset\use_wav_raw\720434905\3300773574.wav	0	4	[1.016928196, 0.5217482448, 0.4343447387, 0.6248825192, 0.3737259507, 1.3904414177]	1.01693	0.521748	0.434345	0.624883	0.373726	1.39044
8	258	general	cy_670191155_2212282070.wav	D:\hc--document\all text\P8_medical\thesis_dataset\use_wav_raw\670191155\2212282070.wav	0	0	[0.6179440618, 1.263956666, 1.3438714743, 0.1727438271, 0.3416364491, 0.3547219336]	0.617944	1.26396	1.34387	0.172744	0.341636	0.354722
9	663	yl	cy_269729803_506756576.wav	D:\hc--document\all text\P8_medical\thesis_dataset\use_wav_raw\269729803\506756576.wav	0	5	[0.6750831604, 1.3777832985, 1.3918533325, 0.1393749565, 0.4398464561, 0.317579031]	0.675083	1.37778	1.39185	0.139375	0.439846	0.317579
10	1753	wz	cy_676334809_2341234440.wav	D:\hc--document\all text\P8_medical\thesis_dataset\use_wav_raw\676334809\2341234440.wav	0	3	[0.9648387432, 0.0071722749, 0.1818722636, 1.4339051247, 0.8853341341, 0.4718045294]	0.964839	0.00717227	0.181872	1.43391	0.885334	0.471805
11	226	yl	cy_712337646_3118077561.wav	D:\hc--document\all text\P8_medical\thesis_dataset\use_wav_raw\712337646\3118077561.wav	0	5	[0.2576117218, 2.0256009102, 1.6823340654, 0.132088244, 0.1584549844, 0.6349651814]	0.257612	2.0256	1.68233	0.132088	0.158455	0.634965
12	1389	yl	cy_675234450_2320484320.wav	D:\hc--document\all text\P8_medical\thesis_dataset\use_wav_raw\675234450\2320484320.wav	0	5	[1.1847593784, 0.1750358939, 0.2621429265, 0.7513179183, 0.3724344075, 1.1458243132]	1.18476	0.175036	0.262143	0.751318	0.372434	1.14582
13	1423	general	cy_431457118_1051529742.wav	D:\hc--document\all text\P8_medical\thesis_dataset\use_wav_raw\431457118\1051529742.wav	0	0	[0.9883266687, 0.3581888974, 0.7445474863, 0.2183190584, 0.450281471, 0.6620460153]	0.988327	0.358189	0.744547	0.218319	0.450281	0.662046
14	810	fn	cy_700350060_2859166134.wav	D:\hc--document\all text\P8_medical\thesis_dataset\use_wav_raw\700350060\2859166134.wav	0	1	[0.1568957418, 1.9614931345, 1.6898350716, 0.1003546119, 0.1781964153, 0.477634728]	0.156896	1.96149	1.68984	0.100355	0.178196	0.477635
15	120	jd	cy_686261374_2556720168.wav	D:\hc--document\all text\P8_medical\thesis_dataset\use_wav_raw\686261374\2556720168.wav	0	2	[0.885080874, 0.049124077, 0.2357914001, 1.4888275862, 1.0363411903, 0.3861085176]	0.885081	0.0491241	0.235791	1.48883	1.03634	0.386109
16	576	jd	cy_723602504_3373152128.wav	D:\hc--document\all text\P8_medical\thesis_dataset\use_wav_raw\723602504\3373152128.wav	0	2	[0.4656048715, 1.4603039026, 1.6027523279, 0.1205897555, 0.4472780824, 0.1174376011]	0.465605	1.4603	1.60275	0.12059	0.447278	0.117438
17	1307	general	cy_714518370_3162736552.wav	D:\hc--document\all text\P8_medical\thesis_dataset\use_wav_raw\714518370\3162736552.wav	0	0	[0.7546342611, 0.5467115045, 1.0418821573, 0.1514819562, 0.9706324935, 0.0]	0.754634	0.546712	1.04188	0.151482	0.970632	0
18	1437	rouhe	cy_698334962_2814159004.wav	D:\hc--document\all text\P8_medical\thesis_dataset\use_wav_raw\698334962\2814159004.wav	0	4	[1.1654338837, 0.1007356197, 0.4373982847, 0.3637407124, 1.0396208763, 0.6851578355]	1.16543	0.100736	0.437398	0.363741	1.03962	0.685158
19	1386	wz	cy_569720626_1636013330.wav	D:\hc--document\all text\P8_medical\thesis_dataset\use_wav_raw\569720626\1636013330.wav	0	3	[0.9797536731, 0.0402625129, 0.2409463674, 1.429861784, 1.2467448711, 0.3184921443]	0.979754	0.0402625	0.240946	1.42986	1.24674	0.318492
20	1549	yl	dx_87874592_25968384.wav	D:\hc--document\all text\P8_medical\thesis_dataset\use_wav_raw\87874592\25968384.wav	0	5	[1.0235068798, 0.4346476197, 0.5183832049, 0.2864986658, 0.3188187778, 1.1904873848]	1.02351	0.434648	0.518383	0.286499	0.318819	1.19049
21	684	rouhe	cy_714321839_3158694010.wav	D:\hc--document\all text\P8_medical\thesis_dataset\use_wav_raw\714321839\3158694010.wav	0	4	[1.0860003233, 0.0, 0.4373780787, 0.6438199282, 1.3701784611, 0.2146598399]	1.086	0	0.437378	0.64382	1.37018	0.21466
22	1114	yl	cy_720843353_3309441095.wav	D:\hc--document\all text\P8_medical\thesis_dataset\use_wav_raw\720843353\3309441095.wav	0	5	[1.0268847942, 0.1872116923, 0.5628160834, 0.2700050473, 1.1746100187, 0.4203318655]	1.02688	0.187212	0.562816	0.270005	1.17461	0.420332
23	839	rouhe	cy_717104407_3223595506.wav	D:\hc--document\all text\P8_medical\thesis_dataset\use_wav_raw\717104407\3223595506.wav	0	4	[1.1846394539, 0.1323490441, 0.3495471776, 0.3920214176, 1.4050740004, 0.3978793621]	1.18464	0.132349	0.349547	0.392021	1.40507	0.397879
24	688	wz	cy_724077306_3385956078.wav	D:\hc--document\all text\P8_medical\thesis_dataset\use_wav_raw\724077306\3385956078.wav	0	3	[1.0598731041, 0.1266753078, 0.2129301727, 1.3568174839, 1.179048419, 0.2080279291]	1.05987	0.126675	0.21293	1.35682	1.17905	0.208028
25	1722	general	dx_90084018_28578012.wav	D:\hc--document\all text\P8_medical\thesis_dataset\use_wav_raw\90084018\28578012.wav	0	0	[1.0769680738, 0.0255940054, 0.3239451051, 0.7229282856, 1.3917715549, 0.1490861177]	1.07697	0.025594	0.323945	0.722928	1.39177	0.149086
26	374	rouhe	cy_718130972_3247311838.wav	D:\hc--document\all text\P8_medical\thesis_dataset\use_wav_raw\718130972\3247311838.wav	0	4	[1.1912573576, 0.1492288411, 0.2316693068, 0.8652693629, 1.0549435616, 0.6807878613]	1.19126	0.149229	0.231669	0.865269	1.05494	0.680788
27	1756	jd	cy_723346249_3367429027.wav	D:\hc--document\all text\P8_medical\thesis_dataset\use_wav_raw\723346249\3367429027.wav	0	2	[0.4123103321, 1.2937548161, 1.520596385, 0.1633598655, 0.2410571128, 0.3261733353]	0.41231	1.29375	1.5206	0.16336	0.241057	0.326173
28	1688	yl	cy_633223959_1972272299.wav	D:\hc--document\all text\P8_medical\thesis_dataset\use_wav_raw\633223959\1972272299.wav	0	5	[0.9560193419, 0.5828269124, 0.5886363983, 0.3492261469, 0.3815530539, 1.1685054302]	0.956019	0.582827	0.588636	0.349226	0.381553	1.16851
29	1220	general	dx_88789990_27287397.wav	D:\hc--document\all text\P8_medical\thesis_dataset\use_wav_raw\88789990\27287397.wav	0	0	[0.7902470231, 0.4545238018, 0.9616716504, 0.1921908706, 1.1328742504, 0.0]	0.790247	0.454524	0.961672	0.192191	1.13287	0
30	996	yl	cy_701680154_2888580628.wav	D:\hc--document\all text\P8_medical\thesis_dataset\use_wav_raw\701680154\2888580628.wav	0	5	[1.1837688684, 0.6549420953, 0.3489095569, 0.7197495699, 0.4020981193, 1.539825201]	1.18377	0.654942	0.34891	0.71975	0.402098	1.53983
31	465	wz	cy_715301509_3180300493.wav	D:\hc--document\all text\P8_medical\thesis_dataset\use_wav_raw\715301509\3180300493.wav	0	3	[1.0511485338, 0.1534392983, 0.2621152699, 1.1796408892, 1.3409813643, 0.3904188871]	1.05115	0.153439	0.262115	1.17964	1.34098	0.390419
32	580	yl	cy_723079489_3360829974.wav	D:\hc--document\all text\P8_medical\thesis_dataset\use_wav_raw\723079489\3360829974.wav	0	5	[1.1284416914, 0.0532371253, 0.504404664, 0.1438370794, 1.354141593, 0.5113945603]	1.12844	0.0532371	0.504405	0.143837	1.35414	0.511395
33	942	fn	dx_90974554_29838328.wav	D:\hc--document\all text\P8_medical\thesis_dataset\use_wav_raw\90974554\29838328.wav	0	1	[0.2067138255, 2.029304266, 1.7272199392, 0.1186625585, 0.2597596049, 0.4404280782]	0.206714	2.0293	1.72722	0.118663	0.25976	0.440428
34	1581	fn	cy_669817116_2204710056.wav	D:\hc--document\all text\P8_medical\thesis_dataset\use_wav_raw\669817116\2204710056.wav	0	1	[0.2557676435, 2.0421285629, 1.6410673857, 0.0936388671, 0.2250172049, 0.4193140566]	0.255768	2.04213	1.64107	0.0936389	0.225017	0.419314
35	423	general	cy_713847610_3148513886.wav	D:\hc--document\all text\P8_medical\thesis_dataset\use_wav_raw\713847610\3148513886.wav	0	0	[1.1875046492, 0.6010223031, 0.5191428065, 0.5044942498, 0.797529161, 1.2209893465]	1.1875	0.601022	0.519143	0.504494	0.797529	1.22099
36	1254	wz	dx_71543284_20107027.wav	D:\hc--document\all text\P8_medical\thesis_dataset\use_wav_raw\71543284\20107027.wav	0	3	[1.1083542109, 0.0, 0.1517665684, 1.2984657288, 0.7971457243, 0.5820281506]	1.10835	0	0.151767	1.29847	0.797146	0.582028
37	68	yl	cy_677870844_2374132320.wav	D:\hc--document\all text\P8_medical\thesis_dataset\use_wav_raw\677870844\2374132320.wav	0	5	[1.1443705559, 0.5820192099, 0.5629197955, 0.4357461333, 0.5581004024, 1.3099302053]	1.14437	0.582019	0.56292	0.435746	0.5581	1.30993
38	946	general	dx_84114735_28397789.wav	D:\hc--document\all text\P8_medical\thesis_dataset\use_wav_raw\84114735\28397789.wav	0	0	[1.1770782471, 0.1368114948, 0.4507327676, 0.164776206, 1.0305991173, 0.5356656909]	1.17708	0.136811	0.450733	0.164776	1.0306	0.535666
39	1266	wz	cy_655490185_2090350646.wav	D:\hc--document\all text\P8_medical\thesis_dataset\use_wav_raw\655490185\2090350646.wav	0	3	[0.9034100771, 0.0254634656, 0.2561080158, 1.3662970066, 1.1437962055, 0.2991870344]	0.90341	0.0254635	0.256108	1.3663	1.1438	0.299187
40	453	general	cy_658376768_2106455681.wav	D:\hc--document\all text\P8_medical\thesis_dataset\use_wav_raw\658376768\2106455681.wav	0	0	[1.2584525347, 0.0365880206, 0.3403695524, 0.4038955569, 0.9396364093, 0.64366889]	1.25845	0.036588	0.34037	0.403896	0.939636	0.643669
41	1066	general	cy_714134639_3154755463.wav	D:\hc--document\all text\P8_medical\thesis_dataset\use_wav_raw\714134639\3154755463.wav	0	0	[0.8372812271, 0.643683672, 1.004758954, 0.2835118771, 0.6529678106, 0.2266403884]	0.837281	0.643684	1.00476	0.283512	0.652968	0.22664
42	1291	jd	cy_677211207_2359856242.wav	D:\hc--document\all text\P8_medical\thesis_dataset\use_wav_raw\677211207\2359856242.wav	0	2	[0.2291151583, 1.9444233179, 1.7495127916, 0.1157773137, 0.2450156361, 0.4518756568]	0.229115	1.94442	1.74951	0.115777	0.245016	0.451876
43	1750	wz	cy_551719617_1546131998.wav	D:\hc--document\all text\P8_medical\thesis_dataset\use_wav_raw\551719617\1546131998.wav	0	3	[1.0389752388, 0.0, 0.3999681771, 0.6383926868, 1.3963999748, 0.0683591738]	1.03898	0	0.399968	0.638393	1.3964	0.0683592
44	1083	rouhe	cy_721373395_3322783460.wav	D:\hc--document\all text\P8_medical\thesis_dataset\use_wav_raw\721373395\3322783460.wav	0	4	[1.0520957708, 0.0588571355, 0.323821038, 1.0100476742, 1.494735837, 0.2696172893]	1.0521	0.0588571	0.323821	1.01005	1.49474	0.269617
45	730	jd	cy_716163233_3200940119.wav	D:\hc--document\all text\P8_medical\thesis_dataset\use_wav_raw\716163233\3200940119.wav	0	2	[0.6012792587, 1.1962912083, 1.3633785248, 0.1343904734, 0.2421334088, 0.2091716379]	0.601279	1.19629	1.36338	0.13439	0.242133	0.209172
46	1244	rouhe	cy_723648250_3374577356.wav	D:\hc--document\all text\P8_medical\thesis_dataset\use_wav_raw\723648250\3374577356.wav	0	4	[0.9389739633, 0.0330551863, 0.3893074989, 1.0802391768, 1.6358903646, 0.1605423242]	0.938974	0.0330552	0.389307	1.08024	1.63589	0.160542
47	1394	yl	cy_723246353_3364002233.wav	D:\hc--document\all text\P8_medical\thesis_dataset\use_wav_raw\723246353\3364002233.wav	0	5	[0.3625847101, 1.5851825476, 1.4850242138, 0.1746372581, 0.1754231602, 0.5938655138]	0.362585	1.58518	1.48502	0.174637	0.175423	0.593866
48	167	yl	cy_692091735_2680963192.wav	D:\hc--document\all text\P8_medical\thesis_dataset\use_wav_raw\692091735\2680963192.wav	0	5	[1.1130498648, 0.461596489, 0.2046620995, 0.9251482487, 0.2332110256, 1.5337730646]	1.11305	0.461596	0.204662	0.925148	0.233211	1.53377
49	867	general	dx_82744302_23552766.wav	D:\hc--document\all text\P8_medical\thesis_dataset\use_wav_raw\82744302\23552766.wav	0	0	[0.7088429928, 0.9243414402, 1.1014775038, 0.3335286081, 0.2512893081, 0.6580861807]	0.708843	0.924341	1.10148	0.333529	0.251289	0.658086
50	699	jd	cy_673698592_2285770730.wav	D:\hc--document\all text\P8_medical\thesis_dataset\use_wav_raw\673698592\2285770730.wav	0	2	[1.0202772617, 0.3822650611, 0.8333610296, 0.1868352592, 0.9488124847, 0.0917725712]	1.02028	0.382265	0.833361	0.186835	0.948812	0.0917726
51	1356	fn	cy_605896469_1826604647.wav	D:\hc--document\all text\P8_medical\thesis_dataset\use_wav_raw\605896469\1826604647.wav	0	1	[0.205807656, 1.9978507757, 1.7269341946, 0.0601932667, 0.2338567227, 0.4655584097]	0.205808	1.99785	1.72693	0.0601933	0.233857	0.465558
52	1775	jd	cy_671859806_2246995004.wav	D:\hc--document\all text\P8_medical\thesis_dataset\use_wav_raw\671859806\2246995004.wav	0	2	[0.5739343166, 1.4181095362, 1.5378245115, 0.1357723922, 0.3288160264, 0.1828115731]	0.573934	1.41811	1.53782	0.135772	0.328816	0.182812
53	794	wz	dx_90511412_29409895.wav	D:\hc--document\all text\P8_medical\thesis_dataset\use_wav_raw\90511412\29409895.wav	0	3	[0.2124973536, 1.9651100636, 1.7035219669, 0.1109605432, 0.3155860901, 0.4137244225]	0.212497	1.96511	1.70352	0.110961	0.315586	0.413724
54	1007	fn	cy_717962325_3243417983.wav	D:\hc--document\all text\P8_medical\thesis_dataset\use_wav_raw\717962325\3243417983.wav	0	1	[0.2345867753, 1.9947857857, 1.6465991735, 0.171654582, 0.2106679827, 0.5530104637]	0.234587	1.99479	1.6466	0.171655	0.210668	0.55301
55	1252	general	cy_688397768_2602596312.wav	D:\hc--document\all text\P8_medical\thesis_dataset\use_wav_raw\688397768\2602596312.wav	0	0	[0.8944303393, 0.788903594, 0.648129046, 0.4269784391, 0.4023293853, 1.4327638149]	0.89443	0.788904	0.648129	0.426978	0.402329	1.43276
56	262	fn	dx_84735179_24207264.wav	D:\hc--document\all text\P8_medical\thesis_dataset\use_wav_raw\84735179\24207264.wav	0	1	[0.2761082947, 1.9884706736, 1.6198616028, 0.1400061101, 0.2079987526, 0.5853017569]	0.276108	1.98847	1.61986	0.140006	0.207999	0.585302
57	344	jd	cy_623145049_1917882065.wav	D:\hc--document\all text\P8_medical\thesis_dataset\use_wav_raw\623145049\1917882065.wav	0	2	[0.3012747765, 1.8583652973, 1.7229361534, 0.0468057878, 0.3107396364, 0.3034287691]	0.301275	1.85837	1.72294	0.0468058	0.31074	0.303429
58	1580	fn	dx_88578349_28079986.wav	D:\hc--document\all text\P8_medical\thesis_dataset\use_wav_raw\88578349\28079986.wav	0	1	[0.4156958163, 1.7035365105, 1.6023997068, 0.1066585854, 0.2819065154, 0.3324094415]	0.415696	1.70354	1.6024	0.106659	0.281907	0.332409
59	171	yl	cy_705306106_2972138630.wav	D:\hc--document\all text\P8_medical\thesis_dataset\use_wav_raw\705306106\2972138630.wav	0	5	[0.9262878895, 0.7018423676, 0.6371571422, 0.2950032055, 0.2733712494, 1.2961615324]	0.926288	0.701842	0.637157	0.295003	0.273371	1.29616
60	441	general	cy_696878032_2781841578.wav	D:\hc--document\all text\P8_medical\thesis_dataset\use_wav_raw\696878032\2781841578.wav	0	0	[0.3441655934, 1.5773130655, 1.6339182854, 0.0620488524, 0.3892091513, 0.1874704063]	0.344166	1.57731	1.63392	0.0620489	0.389209	0.18747
61	493	general	cy_712078370_3113924050.wav	D:\hc--document\all text\P8_medical\thesis_dataset\use_wav_raw\712078370\3113924050.wav	0	0	[1.12043643, 0.0823705271, 0.494895786, 0.1788021177, 1.4929609299, 0.214437753]	1.12044	0.0823705	0.494896	0.178802	1.49296	0.214438
62	1253	fn	cy_592952417_1760691791.wav	D:\hc--document\all text\P8_medical\thesis_dataset\use_wav_raw\592952417\1760691791.wav	0	1	[0.4164854288, 1.669162631, 1.6495794058, 0.1058914065, 0.4190208614, 0.1383408606]	0.416485	1.66916	1.64958	0.105891	0.419021	0.138341
63	168	yl	cy_718191261_3249346624.wav	D:\hc--document\all text\P8_medical\thesis_dataset\use_wav_raw\718191261\3249346624.wav	0	5	[1.1521853209, 0.5381119847, 0.2577778399, 0.8177599907, 0.3430511653, 1.5164549351]	1.15219	0.538112	0.257778	0.81776	0.343051	1.51645
64	1650	fn	cy_682380496_2471895068.wav	D:\hc--document\all text\P8_medical\thesis_dataset\use_wav_raw\682380496\2471895068.wav	0	1	[0.5536632538, 1.5344449282, 1.3078417778, 0.2613764703, 0.3226617277, 0.6088098884]	0.553663	1.53444	1.30784	0.261376	0.322662	0.60881
65	270	jd	cy_647709481_2048262227.wav	D:\hc--document\all text\P8_medical\thesis_dataset\use_wav_raw\647709481\2048262227.wav	0	2	[0.8988431692, 0.1376438588, 0.248363018, 1.4416639805, 1.1106883287, 0.3435206413]	0.898843	0.137644	0.248363	1.44166	1.11069	0.343521
66	460	general	cy_629809978_1955761241.wav	D:\hc--document\all text\P8_medical\thesis_dataset\use_wav_raw\629809978\1955761241.wav	0	0	[0.9989572763, 0.1402513534, 0.2376920581, 1.3904621601, 0.4797433317, 0.872217536]	0.998957	0.140251	0.237692	1.39046	0.479743	0.872218
67	1509	wz	dx_90205634_28717005.wav	D:\hc--document\all text\P8_medical\thesis_dataset\use_wav_raw\90205634\28717005.wav	0	3	[1.0160099268, 0.0955750421, 0.2413310707, 1.4127348661, 0.6857535839, 0.7396387458]	1.01601	0.095575	0.241331	1.41273	0.685754	0.739639
68	1715	general	cy_691764066_2673900344.wav	D:\hc--document\all text\P8_medical\thesis_dataset\use_wav_raw\691764066\2673900344.wav	0	0	[1.1445485353, 0.0, 0.0949957371, 1.2705417871, 0.5761069655, 0.718701005]	1.14455	0	0.0949957	1.27054	0.576107	0.718701
69	645	rouhe	cy_722491289_3346568109.wav	D:\hc--document\all text\P8_medical\thesis_dataset\use_wav_raw\722491289\3346568109.wav	0	4	[0.9652788043, 0.0232317839, 0.2781161368, 1.4055001736, 1.2864166498, 0.2321894467]	0.965279	0.0232318	0.278116	1.4055	1.28642	0.232189
70	1433	jd	cy_601915601_1806353276.wav	D:\hc--document\all text\P8_medical\thesis_dataset\use_wav_raw\601915601\1806353276.wav	0	2	[0.3982575536, 1.3690395355, 1.3972994089, 0.1732037067, 0.0832807422, 0.3944699466]	0.398258	1.36904	1.3973	0.173204	0.0832807	0.39447
71	245	jd	cy_683894657_2505432650.wav	D:\hc--document\all text\P8_medical\thesis_dataset\use_wav_raw\683894657\2505432650.wav	0	2	[0.5731672049, 1.1677787304, 1.372435689, 0.1735014021, 0.4214731157, 0.1756142676]	0.573167	1.16778	1.37244	0.173501	0.421473	0.175614
72	815	jd	cy_668663850_2181039484.wav	D:\hc--document\all text\P8_medical\thesis_dataset\use_wav_raw\668663850\2181039484.wav	0	2	[0.4115681052, 1.6887940168, 1.708052516, 0.0777562559, 0.3485610783, 0.3153384626]	0.411568	1.68879	1.70805	0.0777563	0.348561	0.315338
73	1230	jd	cy_684712504_2523338190.wav	D:\hc--document\all text\P8_medical\thesis_dataset\use_wav_raw\684712504\2523338190.wav	0	2	[0.5014264584, 1.4337443113, 1.4676477909, 0.1090671793, 0.2684476376, 0.1976494938]	0.501426	1.43374	1.46765	0.109067	0.268448	0.197649
74	125	yl	cy_684382839_2516085086.wav	D:\hc--document\all text\P8_medical\thesis_dataset\use_wav_raw\684382839\2516085086.wav	0	5	[0.7037255168, 0.8401620984, 1.1117225885, 0.2443495393, 0.2386695296, 0.5590356588]	0.703726	0.840162	1.11172	0.24435	0.23867	0.559036
75	1031	fn	cy_700969402_2872911954.wav	D:\hc--document\all text\P8_medical\thesis_dataset\use_wav_raw\700969402\2872911954.wav	0	1	[0.3630111814, 1.5023838282, 1.7153744698, 0.1195441112, 0.232647121, 0.2345555127]	0.363011	1.50238	1.71537	0.119544	0.232647	0.234556
76	543	rouhe	cy_686165499_2555780486.wav	D:\hc--document\all text\P8_medical\thesis_dataset\use_wav_raw\686165499\2555780486.wav	0	4	[1.2556250095, 0.0, 0.3583254814, 0.3085562587, 1.5213772058, 0.3093671203]	1.25563	0	0.358325	0.308556	1.52138	0.309367
77	1355	yl	cy_693122479_2703305850.wav	D:\hc--document\all text\P8_medical\thesis_dataset\use_wav_raw\693122479\2703305850.wav	0	5	[1.0933111906, 0.3634831905, 0.5364950299, 0.344132632, 0.4475355744, 1.0548949242]	1.09331	0.363483	0.536495	0.344133	0.447536	1.05489
78	1226	fn	cy_159576408_217182179.wav	D:\hc--document\all text\P8_medical\thesis_dataset\use_wav_raw\159576408\217182179.wav	0	1	[0.2520012259, 1.9103685617, 1.6934319735, 0.1330677718, 0.393794179, 0.389870882]	0.252001	1.91037	1.69343	0.133068	0.393794	0.389871
79	1439	fn	cy_559752281_1584945137.wav	D:\hc--document\all text\P8_medical\thesis_dataset\use_wav_raw\559752281\1584945137.wav	0	1	[0.1643712223, 1.9571564198, 1.7714320421, 0.0449787825, 0.2599312365, 0.3487404883]	0.164371	1.95716	1.77143	0.0449788	0.259931	0.34874
80	1304	general	cy_669020022_2188263930.wav	D:\hc--document\all text\P8_medical\thesis_dataset\use_wav_raw\669020022\2188263930.wav	0	0	[0.2323360592, 1.7502143383, 1.7023334503, 0.1053827852, 0.3047870398, 0.3842286766]	0.232336	1.75021	1.70233	0.105383	0.304787	0.384229
81	1059	fn	cy_722907902_3357407674.wav	D:\hc--document\all text\P8_medical\thesis_dataset\use_wav_raw\722907902\3357407674.wav	0	1	[1.1782835722, 0.2282250524, 0.3293318152, 0.7582796812, 0.3173429072, 1.2393862009]	1.17828	0.228225	0.329332	0.75828	0.317343	1.23939
82	473	general	dx_91093726_30498087.wav	D:\hc--document\all text\P8_medical\thesis_dataset\use_wav_raw\91093726\30498087.wav	0	0	[1.107747674, 0.0050428505, 0.1950597465, 1.1723384857, 0.4001755416, 0.955627501]	1.10775	0.00504285	0.19506	1.17234	0.400176	0.955628
83	783	general	cy_679190548_2402694320.wav	D:\hc--document\all text\P8_medical\thesis_dataset\use_wav_raw\679190548\2402694320.wav	0	0	[1.2558304071, 0.0754858702, 0.1362529397, 1.220156312, 0.4130586982, 0.8863835931]	1.25583	0.0754859	0.136253	1.22016	0.413059	0.886384
84	1739	yl	cy_701904886_2893583928.wav	D:\hc--document\all text\P8_medical\thesis_dataset\use_wav_raw\701904886\2893583928.wav	0	5	[1.0767313242, 0.2084576786, 0.0402490608, 1.1920657158, 0.1397643536, 1.179461956]	1.07673	0.208458	0.0402491	1.19207	0.139764	1.17946
85	539	wz	cy_669475492_2197604482.wav	D:\hc--document\all text\P8_medical\thesis_dataset\use_wav_raw\669475492\2197604482.wav	0	3	[0.1751239598, 2.1253974438, 1.7364803553, 0.0549583845, 0.1288554966, 0.4724819064]	0.175124	2.1254	1.73648	0.0549584	0.128855	0.472482
86	113	yl	cy_589631754_1743301268.wav	D:\hc--document\all text\P8_medical\thesis_dataset\use_wav_raw\589631754\1743301268.wav	0	5	[0.8888923526, 0.8097675443, 0.9248399138, 0.2743856907, 0.5373754501, 1.1076681614]	0.888892	0.809768	0.92484	0.274386	0.537375	1.10767
87	328	general	dx_91544226_30803032.wav	D:\hc--document\all text\P8_medical\thesis_dataset\use_wav_raw\91544226\30803032.wav	0	0	[0.7013731003, 0.8219252825, 1.1605658531, 0.2653183937, 0.1860276908, 0.313670963]	0.701373	0.821925	1.16057	0.265318	0.186028	0.313671
88	1188	general	cy_672270902_2255946676.wav	D:\hc--document\all text\P8_medical\thesis_dataset\use_wav_raw\672270902\2255946676.wav	0	0	[1.1900290251, 0.0897284746, 0.4776083827, 0.1856686622, 1.1768692732, 0.0996054187]	1.19003	0.0897285	0.477608	0.185669	1.17687	0.0996054
89	774	rouhe	cy_724595875_3397252397.wav	D:\hc--document\all text\P8_medical\thesis_dataset\use_wav_raw\724595875\3397252397.wav	0	4	[1.0755364895, 0.0, 0.3210511506, 0.967604816, 1.4379965067, 0.2991307676]	1.07554	0	0.321051	0.967605	1.438	0.299131
90	804	fn	dx_87163153_24912922.wav	D:\hc--document\all text\P8_medical\thesis_dataset\use_wav_raw\87163153\24912922.wav	0	1	[0.6655278802, 1.3183500767, 1.0673267841, 0.2083219886, 0.440381676, 1.2133455276]	0.665528	1.31835	1.06733	0.208322	0.440382	1.21335
91	398	general	cy_715946735_3196417168.wav	D:\hc--document\all text\P8_medical\thesis_dataset\use_wav_raw\715946735\3196417168.wav	0	0	[0.8778396249, 0.7031547427, 0.9166102409, 0.2973247766, 0.3412854075, 0.6633273959]	0.87784	0.703155	0.91661	0.297325	0.341285	0.663327
92	249	wz	cy_716857047_3217113543.wav	D:\hc--document\all text\P8_medical\thesis_dataset\use_wav_raw\716857047\3217113543.wav	0	3	[0.8832686543, 0.0517053157, 0.2531870902, 1.4899536371, 1.2906159163, 0.2375052571]	0.883269	0.0517053	0.253187	1.48995	1.29062	0.237505
93	667	wz	dx_92709074_32415960.wav	D:\hc--document\all text\P8_medical\thesis_dataset\use_wav_raw\92709074\32415960.wav	0	3	[1.0695540905, 0.1457598209, 0.2684150934, 1.1587181091, 0.9162003398, 0.6784151793]	1.06955	0.14576	0.268415	1.15872	0.9162	0.678415
94	1617	general	cy_700922004_2871846426.wav	D:\hc--document\all text\P8_medical\thesis_dataset\use_wav_raw\700922004\2871846426.wav	0	0	[1.2085120678, 0.0774691775, 0.4580005109, 0.373532027, 0.628584981, 0.8272608519]	1.20851	0.0774692	0.458001	0.373532	0.628585	0.827261
95	1536	jd	cy_714843556_3169988658.wav	D:\hc--document\all text\P8_medical\thesis_dataset\use_wav_raw\714843556\3169988658.wav	0	2	[0.8894397616, 0.6433658004, 0.8637133837, 0.2482735515, 0.4308011234, 0.5408449769]	0.88944	0.643366	0.863713	0.248274	0.430801	0.540845
96	1170	general	cy_720900895_3310562420.wav	D:\hc--document\all text\P8_medical\thesis_dataset\use_wav_raw\720900895\3310562420.wav	0	0	[0.9524157047, 0.1652692854, 0.3387329876, 1.3345547915, 0.7276886106, 0.588961482]	0.952416	0.165269	0.338733	1.33455	0.727689	0.588961
97	1153	jd	dx_78671297_22342730.wav	D:\hc--document\all text\P8_medical\thesis_dataset\use_wav_raw\78671297\22342730.wav	0	2	[0.2674543858, 1.9938634634, 1.6719478369, 0.0916882902, 0.2355639935, 0.4896612167]	0.267454	1.99386	1.67195	0.0916883	0.235564	0.489661
98	420	wz	cy_723552549_3371714244.wav	D:\hc--document\all text\P8_medical\thesis_dataset\use_wav_raw\723552549\3371714244.wav	0	3	[0.5542359352, 1.0093626976, 1.3718032837, 0.2730523348, 0.260068953, 0.1669735014]	0.554236	1.00936	1.3718	0.273052	0.260069	0.166974
99	1530	jd	dx_78000279_22092514.wav	D:\hc--document\all text\P8_medical\thesis_dataset\use_wav_raw\78000279\22092514.wav	0	2	[1.0464675426, 0.1947106719, 0.3860932589, 0.9298903942, 1.4353665113, 0.3529283106]	1.04647	0.194711	0.386093	0.92989	1.43537	0.352928
100	680	wz	cy_719110890_3269564007.wav	D:\hc--document\all text\P8_medical\thesis_dataset\use_wav_raw\719110890\3269564007.wav	0	3	[0.8070971966, 0.7440934181, 1.0292876959, 0.2081684172, 0.4477897584, 0.4435308874]	0.807097	0.744093	1.02929	0.208168	0.44779	0.443531
101	108	rouhe	cy_722567386_3348512855.wav	D:\hc--document\all text\P8_medical\thesis_dataset\use_wav_raw\722567386\3348512855.wav	0	4	[1.1953279972, 0.0192193985, 0.3095198572, 0.6785210371, 1.4699602127, 0.2108188719]	1.19533	0.0192194	0.30952	0.678521	1.46996	0.210819
102	1133	rouhe	cy_720943487_3312299800.wav	D:\hc--document\all text\P8_medical\thesis_dataset\use_wav_raw\720943487\3312299800.wav	0	4	[1.2302900553, 0.020602772, 0.3904384077, 0.3260542452, 1.3838832378, 0.4320802987]	1.23029	0.0206028	0.390438	0.326054	1.38388	0.43208
103	608	fn	dx_70372640_21407503.wav	D:\hc--document\all text\P8_medical\thesis_dataset\use_wav_raw\70372640\21407503.wav	0	1	[0.3696762323, 1.4802818298, 1.6654722691, 0.0589627847, 0.3608114719, 0.1257097572]	0.369676	1.48028	1.66547	0.0589628	0.360811	0.12571
104	1408	wz	cy_716668241_3214240045.wav	D:\hc--document\all text\P8_medical\thesis_dataset\use_wav_raw\716668241\3214240045.wav	0	3	[1.0358380079, 0.0157425813, 0.1538631171, 1.4858925343, 0.5589783192, 0.7877135277]	1.03584	0.0157426	0.153863	1.48589	0.558978	0.787714
105	1630	general	dx_90873055_30265906.wav	D:\hc--document\all text\P8_medical\thesis_dataset\use_wav_raw\90873055\30265906.wav	0	0	[0.9789494872, 0.3222068548, 0.6496342421, 0.2403072715, 0.7851860523, 0.4939005971]	0.978949	0.322207	0.649634	0.240307	0.785186	0.493901
106	1728	yl	cy_669798354_2204288714.wav	D:\hc--document\all text\P8_medical\thesis_dataset\use_wav_raw\669798354\2204288714.wav	0	5	[0.9936272502, 0.5584990978, 0.4519055486, 0.4320287108, 0.2227271795, 1.3587081432]	0.993627	0.558499	0.451906	0.432029	0.222727	1.35871
107	598	jd	cy_679305501_2405215566.wav	D:\hc--document\all text\P8_medical\thesis_dataset\use_wav_raw\679305501\2405215566.wav	0	2	[0.9923748374, 0.0993423909, 0.2797816396, 1.4045767784, 1.2288028002, 0.4084486067]	0.992375	0.0993424	0.279782	1.40458	1.2288	0.408449
108	424	rouhe	cy_716396489_3207067080.wav	D:\hc--document\all text\P8_medical\thesis_dataset\use_wav_raw\716396489\3207067080.wav	0	4	[0.9989367127, 0.5112326145, 0.6396167278, 0.2929181159, 0.2719029188, 1.1057882309]	0.998937	0.511233	0.639617	0.292918	0.271903	1.10579
109	151	yl	cy_684799127_2525209878.wav	D:\hc--document\all text\P8_medical\thesis_dataset\use_wav_raw\684799127\2525209878.wav	0	5	[0.9924079776, 0.6803817153, 0.6145147681, 0.5780584812, 0.3594878912, 1.4555108547]	0.992408	0.680382	0.614515	0.578058	0.359488	1.45551
110	984	yl	cy_721983399_3335074179.wav	D:\hc--document\all text\P8_medical\thesis_dataset\use_wav_raw\721983399\3335074179.wav	0	5	[0.9437375665, 0.1504794061, 0.2883571982, 1.4860533476, 1.1599582434, 0.4869496226]	0.943738	0.150479	0.288357	1.48605	1.15996	0.48695
111	1642	fn	cy_717886956_3241420872.wav	D:\hc--document\all text\P8_medical\thesis_dataset\use_wav_raw\717886956\3241420872.wav	0	1	[0.2150322795, 2.0553314686, 1.7113074064, 0.1239401326, 0.1069076061, 0.5993510485]	0.215032	2.05533	1.71131	0.12394	0.106908	0.599351
112	534	wz	cy_711712693_3106120535.wav	D:\hc--document\all text\P8_medical\thesis_dataset\use_wav_raw\711712693\3106120535.wav	0	3	[0.9695138335, 0.0743105784, 0.2875129282, 1.4609538317, 0.8502143025, 0.6432908773]	0.969514	0.0743106	0.287513	1.46095	0.850214	0.643291
113	1142	rouhe	cy_724416927_3392862186.wav	D:\hc--document\all text\P8_medical\thesis_dataset\use_wav_raw\724416927\3392862186.wav	0	4	[0.9634920955, 0.097983554, 0.2165867835, 1.3978050947, 1.3806048632, 0.1226107106]	0.963492	0.0979836	0.216587	1.39781	1.3806	0.122611
114	1202	jd	dx_90866272_30229077.wav	D:\hc--document\all text\P8_medical\thesis_dataset\use_wav_raw\90866272\30229077.wav	0	2	[0.2811104655, 1.735132575, 1.5855743885, 0.1459595412, 0.113680616, 0.6119634509]	0.28111	1.73513	1.58557	0.14596	0.113681	0.611963
115	1452	jd	dx_92700338_32343617.wav	D:\hc--document\all text\P8_medical\thesis_dataset\use_wav_raw\92700338\32343617.wav	0	2	[0.3016016781, 1.7860398293, 1.6848943233, 0.0408717878, 0.2908869088, 0.2602385283]	0.301602	1.78604	1.68489	0.0408718	0.290887	0.260239
116	605	fn	dx_72420467_20356513.wav	D:\hc--document\all text\P8_medical\thesis_dataset\use_wav_raw\72420467\20356513.wav	0	1	[0.3221013844, 1.7565205097, 1.7705051899, 0.0561792776, 0.3151636422, 0.2081424594]	0.322101	1.75652	1.77051	0.0561793	0.315164	0.208142
117	799	fn	cy_706030040_2989771268.wav	D:\hc--document\all text\P8_medical\thesis_dataset\use_wav_raw\706030040\2989771268.wav	0	1	[1.2115783691, 0.0, 0.1986447424, 1.203907609, 0.6308335066, 0.8481363654]	1.21158	0	0.198645	1.20391	0.630834	0.848136
118	79	fn	dx_90263235_29022723.wav	D:\hc--document\all text\P8_medical\thesis_dataset\use_wav_raw\90263235\29022723.wav	0	1	[0.2474689931, 2.0430505276, 1.6928607225, 0.1159609705, 0.2327515185, 0.5185420513]	0.247469	2.04305	1.69286	0.115961	0.232752	0.518542
119	320	jd	cy_679268378_2404924422.wav	D:\hc--document\all text\P8_medical\thesis_dataset\use_wav_raw\679268378\2404924422.wav	0	2	[0.2842381001, 1.7473884821, 1.7692395449, 0.0505956411, 0.2356256843, 0.2910327911]	0.284238	1.74739	1.76924	0.0505956	0.235626	0.291033
120	1738	wz	dx_82042544_31370382.wav	D:\hc--document\all text\P8_medical\thesis_dataset\use_wav_raw\82042544\31370382.wav	0	3	[1.0060776472, 0.1210877225, 0.2250218838, 1.3230774403, 0.9946328402, 0.3720876276]	1.00608	0.121088	0.225022	1.32308	0.994633	0.372088
121	366	general	cy_715941929_3196118840.wav	D:\hc--document\all text\P8_medical\thesis_dataset\use_wav_raw\715941929\3196118840.wav	0	0	[0.8453265429, 0.7336576581, 1.0023308992, 0.2771300077, 0.4436763525, 0.3428076804]	0.845327	0.733658	1.00233	0.27713	0.443676	0.342808
122	1446	wz	cy_696385644_2771164544.wav	D:\hc--document\all text\P8_medical\thesis_dataset\use_wav_raw\696385644\2771164544.wav	0	3	[1.0037916899, 0.0200287066, 0.238136366, 1.4920393229, 0.6086276174, 0.4648648202]	1.00379	0.0200287	0.238136	1.49204	0.608628	0.464865
123	629	jd	cy_433048113_1057225866.wav	D:\hc--document\all text\P8_medical\thesis_dataset\use_wav_raw\433048113\1057225866.wav	0	2	[0.4144503474, 1.4096623659, 1.7361184359, 0.0280558374, 0.3861044645, 0.0072371541]	0.41445	1.40966	1.73612	0.0280558	0.386104	0.00723715
124	529	rouhe	cy_683155751_2488941140.wav	D:\hc--document\all text\P8_medical\thesis_dataset\use_wav_raw\683155751\2488941140.wav	0	4	[0.247594893, 1.8099191189, 1.6645973921, 0.1849295348, 0.2104557008, 0.729655087]	0.247595	1.80992	1.6646	0.18493	0.210456	0.729655
125	269	wz	dx_91488433_30521091.wav	D:\hc--document\all text\P8_medical\thesis_dataset\use_wav_raw\91488433\30521091.wav	0	3	[1.1142201424, 0.0406026542, 0.4292521477, 0.3832982183, 1.3924838305, 0.3807342052]	1.11422	0.0406027	0.429252	0.383298	1.39248	0.380734
126	1520	fn	cy_599599765_1794223607.wav	D:\hc--document\all text\P8_medical\thesis_dataset\use_wav_raw\599599765\1794223607.wav	0	1	[0.2056786269, 2.0204217434, 1.7193620205, 0.0981612504, 0.1842871755, 0.5359841585]	0.205679	2.02042	1.71936	0.0981613	0.184287	0.535984
127	947	general	cy_719883377_3287371967.wav	D:\hc--document\all text\P8_medical\thesis_dataset\use_wav_raw\719883377\3287371967.wav	0	0	[0.8821953535, 0.1716944277, 0.2683335841, 1.3610742092, 0.4464042187, 0.9900134206]	0.882195	0.171694	0.268334	1.36107	0.446404	0.990013
128	732	general	dx_91388498_30446666.wav	D:\hc--document\all text\P8_medical\thesis_dataset\use_wav_raw\91388498\30446666.wav	0	0	[0.9447228312, 0.4858609438, 0.7763788104, 0.3387967944, 0.398014158, 0.5734257698]	0.944723	0.485861	0.776379	0.338797	0.398014	0.573426
129	96	jd	dx_89105147_27689456.wav	D:\hc--document\all text\P8_medical\thesis_dataset\use_wav_raw\89105147\27689456.wav	0	2	[0.7582709193, 0.7495554686, 1.0918000937, 0.2115183175, 0.3275479972, 0.4705175757]	0.758271	0.749555	1.0918	0.211518	0.327548	0.470518
130	372	fn	dx_88330246_26937835.wav	D:\hc--document\all text\P8_medical\thesis_dataset\use_wav_raw\88330246\26937835.wav	0	1	[1.0283144712, 0.6391918659, 0.7524423599, 0.3829819262, 0.6177625656, 1.2026532888]	1.02831	0.639192	0.752442	0.382982	0.617763	1.20265
131	1702	jd	dx_91621656_31083222.wav	D:\hc--document\all text\P8_medical\thesis_dataset\use_wav_raw\91621656\31083222.wav	0	2	[0.9886136651, 0.4318168759, 0.6851909757, 0.2947238684, 0.2416118532, 1.0275973082]	0.988614	0.431817	0.685191	0.294724	0.241612	1.0276
132	1494	jd	dx_87140271_26880822.wav	D:\hc--document\all text\P8_medical\thesis_dataset\use_wav_raw\87140271\26880822.wav	0	2	[0.6339507699, 1.0498769283, 1.3028512001, 0.2663101256, 0.2489638925, 0.4022227228]	0.633951	1.04988	1.30285	0.26631	0.248964	0.402223
133	789	general	cy_715071536_3176178302.wav	D:\hc--document\all text\P8_medical\thesis_dataset\use_wav_raw\715071536\3176178302.wav	0	0	[1.1068437099, 0.0, 0.1209185198, 1.2210083008, 0.3962932229, 0.9768802524]	1.10684	0	0.120919	1.22101	0.396293	0.97688
134	752	general	cy_704379520_2950182458.wav	D:\hc--document\all text\P8_medical\thesis_dataset\use_wav_raw\704379520\2950182458.wav	0	0	[1.2517586946, 0.1824056804, 0.3140785098, 0.3740797043, 0.910207808, 0.6770746112]	1.25176	0.182406	0.314079	0.37408	0.910208	0.677075
135	980	rouhe	cy_559125393_1581846356.wav	D:\hc--document\all text\P8_medical\thesis_dataset\use_wav_raw\559125393\1581846356.wav	0	4	[1.2116552591, 0.043500185, 0.3697178364, 0.2646180689, 1.333476305, 0.4359874427]	1.21166	0.0435002	0.369718	0.264618	1.33348	0.435987
136	1320	jd	cy_556474455_1569020822.wav	D:\hc--document\all text\P8_medical\thesis_dataset\use_wav_raw\556474455\1569020822.wav	0	2	[0.2628392577, 1.8737673759, 1.6089090109, 0.1698436439, 0.1916528344, 0.6799716949]	0.262839	1.87377	1.60891	0.169844	0.191653	0.679972
137	925	jd	cy_717537648_3234745256.wav	D:\hc--document\all text\P8_medical\thesis_dataset\use_wav_raw\717537648\3234745256.wav	0	2	[0.3072834313, 1.8151965141, 1.6990914345, 0.094610095, 0.1718209535, 0.4214568138]	0.307283	1.8152	1.69909	0.0946101	0.171821	0.421457
138	1309	jd	cy_680375227_2429116296.wav	D:\hc--document\all text\P8_medical\thesis_dataset\use_wav_raw\680375227\2429116296.wav	0	2	[0.7378091216, 0.6319759488, 1.0797621012, 0.2103810906, 0.4507627487, 0.0642045885]	0.737809	0.631976	1.07976	0.210381	0.450763	0.0642046
139	692	fn	dx_91422202_30625046.wav	D:\hc--document\all text\P8_medical\thesis_dataset\use_wav_raw\91422202\30625046.wav	0	1	[0.2576039433, 1.8818714619, 1.7551516294, 0.0636685565, 0.2578307092, 0.3197037578]	0.257604	1.88187	1.75515	0.0636686	0.257831	0.319704
140	1653	fn	cy_664247814_2139327542.wav	D:\hc--document\all text\P8_medical\thesis_dataset\use_wav_raw\664247814\2139327542.wav	0	1	[0.2515292168, 1.956799984, 1.7313716412, 0.1032385454, 0.2604601979, 0.4711611569]	0.251529	1.9568	1.73137	0.103239	0.26046	0.471161
141	1119	rouhe	cy_721896032_3333327390.wav	D:\hc--document\all text\P8_medical\thesis_dataset\use_wav_raw\721896032\3333327390.wav	0	4	[0.9266756773, 0.0748450011, 0.2111036032, 1.3796280622, 1.3991838694, 0.229757145]	0.926676	0.074845	0.211104	1.37963	1.39918	0.229757
142	1441	fn	cy_669607669_2200348758.wav	D:\hc--document\all text\P8_medical\thesis_dataset\use_wav_raw\669607669\2200348758.wav	0	1	[0.2965880036, 1.7274461985, 1.7571020126, 0.0650498196, 0.3494699299, 0.3824539781]	0.296588	1.72745	1.7571	0.0650498	0.34947	0.382454
143	140	jd	cy_714880402_3171582916.wav	D:\hc--document\all text\P8_medical\thesis_dataset\use_wav_raw\714880402\3171582916.wav	0	2	[1.3894275427, 0.1167050526, 0.2946710289, 0.5722386241, 1.1070972681, 0.8119419813]	1.38943	0.116705	0.294671	0.572239	1.1071	0.811942
144	502	wz	cy_681878828_2461495808.wav	D:\hc--document\all text\P8_medical\thesis_dataset\use_wav_raw\681878828\2461495808.wav	0	3	[1.071095109, 0.0, 0.1815139651, 1.2641999722, 1.1697444916, 0.3266351819]	1.0711	0	0.181514	1.2642	1.16974	0.326635
145	607	general	dx_91808805_30909809.wav	D:\hc--document\all text\P8_medical\thesis_dataset\use_wav_raw\91808805\30909809.wav	0	0	[0.9997726679, 0.023641251, 0.3023351729, 1.2982935905, 1.014177084, 0.4150108397]	0.999773	0.0236413	0.302335	1.29829	1.01418	0.415011
146	161	fn	cy_701742968_2889944754.wav	D:\hc--document\all text\P8_medical\thesis_dataset\use_wav_raw\701742968\2889944754.wav	0	1	[0.4112187028, 1.7222515345, 1.5878605843, 0.1546588391, 0.3528373837, 0.2594154179]	0.411219	1.72225	1.58786	0.154659	0.352837	0.259415
147	382	jd	cy_670421305_2217106522.wav	D:\hc--document\all text\P8_medical\thesis_dataset\use_wav_raw\670421305\2217106522.wav	0	2	[0.248462677, 2.0099773407, 1.6657100916, 0.071307905, 0.2527236938, 0.4925424457]	0.248463	2.00998	1.66571	0.0713079	0.252724	0.492542
148	1227	wz	cy_721117079_3315817477.wav	D:\hc--document\all text\P8_medical\thesis_dataset\use_wav_raw\721117079\3315817477.wav	0	3	[0.9745693207, 0.0, 0.2843475044, 1.3607068062, 1.0572633743, 0.3595238924]	0.974569	0	0.284348	1.36071	1.05726	0.359524
149	622	rouhe	cy_721414308_3323437362.wav	D:\hc--document\all text\P8_medical\thesis_dataset\use_wav_raw\721414308\3323437362.wav	0	4	[1.1590688229, 0.1547715664, 0.4889902472, 0.1667734981, 1.4681582451, 0.2071989477]	1.15907	0.154772	0.48899	0.166773	1.46816	0.207199
150	717	rouhe	cy_694484586_2731842804.wav	D:\hc--document\all text\P8_medical\thesis_dataset\use_wav_raw\694484586\2731842804.wav	0	4	[1.1359055042, 0.0, 0.2989749908, 1.0795881748, 1.2076488733, 0.4279282987]	1.13591	0	0.298975	1.07959	1.20765	0.427928
151	1068	fn	dx_88068742_26665799.wav	D:\hc--document\all text\P8_medical\thesis_dataset\use_wav_raw\88068742\26665799.wav	0	1	[0.3330830336, 1.8503712416, 1.6362817287, 0.1369311959, 0.2293483764, 0.4446520209]	0.333083	1.85037	1.63628	0.136931	0.229348	0.444652
152	1205	jd	dx_84065317_28148820.wav	D:\hc--document\all text\P8_medical\thesis_dataset\use_wav_raw\84065317\28148820.wav	0	2	[0.3589815497, 1.6150199175, 1.7041569948, 0.0873224735, 0.3279179037, 0.5328608155]	0.358982	1.61502	1.70416	0.0873225	0.327918	0.532861
153	162	wz	cy_714570004_3164380876.wav	D:\hc--document\all text\P8_medical\thesis_dataset\use_wav_raw\714570004\3164380876.wav	0	3	[1.0314301252, 0.0444734246, 0.1736013889, 1.411509037, 0.3699548841, 0.9323804975]	1.03143	0.0444734	0.173601	1.41151	0.369955	0.93238
154	1194	fn	cy_675857724_2332009616.wav	D:\hc--document\all text\P8_medical\thesis_dataset\use_wav_raw\675857724\2332009616.wav	0	1	[0.2078154981, 2.0216836929, 1.7168848515, 0.1173057258, 0.2115747184, 0.4574116468]	0.207815	2.02168	1.71688	0.117306	0.211575	0.457412
155	1493	rouhe	cy_709149334_3055640752.wav	D:\hc--document\all text\P8_medical\thesis_dataset\use_wav_raw\709149334\3055640752.wav	0	4	[0.9727567434, 0.0675087348, 0.3397677541, 1.1853111982, 1.468303442, 0.3542674482]	0.972757	0.0675087	0.339768	1.18531	1.4683	0.354267
156	1081	fn	cy_716880515_3218770015.wav	D:\hc--document\all text\P8_medical\thesis_dataset\use_wav_raw\716880515\3218770015.wav	0	1	[0.1974972188, 2.0275475979, 1.7253849506, 0.0969980434, 0.1588941514, 0.5154963732]	0.197497	2.02755	1.72538	0.096998	0.158894	0.515496
157	787	general	cy_248722531_445445853.wav	D:\hc--document\all text\P8_medical\thesis_dataset\use_wav_raw\248722531\445445853.wav	0	0	[1.0283435583, 0.2586082518, 0.7012275457, 0.1815953255, 1.184081316, 0.0655685291]	1.02834	0.258608	0.701228	0.181595	1.18408	0.0655685
158	1563	rouhe	cy_668388218_2175453376.wav	D:\hc--document\all text\P8_medical\thesis_dataset\use_wav_raw\668388218\2175453376.wav	0	4	[0.8656266928, 0.0109433448, 0.3370364308, 1.355756402, 1.3135409355, 0.3926492631]	0.865627	0.0109433	0.337036	1.35576	1.31354	0.392649
159	383	rouhe	dx_90109091_28722860.wav	D:\hc--document\all text\P8_medical\thesis_dataset\use_wav_raw\90109091\28722860.wav	0	4	[1.0268770456, 0.1045846567, 0.4424984753, 0.6897355914, 1.4998328686, 0.0369839147]	1.02688	0.104585	0.442498	0.689736	1.49983	0.0369839
160	1151	rouhe	cy_723816946_3378423977.wav	D:\hc--document\all text\P8_medical\thesis_dataset\use_wav_raw\723816946\3378423977.wav	0	4	[1.1368768215, 0.0318681225, 0.5204796195, 0.2391685545, 1.1281998158, 0.5110106468]	1.13688	0.0318681	0.52048	0.239169	1.1282	0.511011
161	1140	wz	cy_682855461_2482311378.wav	D:\hc--document\all text\P8_medical\thesis_dataset\use_wav_raw\682855461\2482311378.wav	0	3	[0.8356557488, 0.1226170212, 0.3617900908, 1.4401963949, 1.4405366182, 0.2756254375]	0.835656	0.122617	0.36179	1.4402	1.44054	0.275625
162	1157	fn	cy_602849955_1811015183.wav	D:\hc--document\all text\P8_medical\thesis_dataset\use_wav_raw\602849955\1811015183.wav	0	1	[0.2420957536, 1.930705905, 1.6765725613, 0.0857414678, 0.2516452372, 0.4045669138]	0.242096	1.93071	1.67657	0.0857415	0.251645	0.404567
163	1758	wz	cy_615087885_1875029234.wav	D:\hc--document\all text\P8_medical\thesis_dataset\use_wav_raw\615087885\1875029234.wav	0	3	[0.5667755008, 1.4007946253, 1.1325464249, 0.2331928164, 0.3374839723, 0.8846909404]	0.566776	1.40079	1.13255	0.233193	0.337484	0.884691
164	697	wz	cy_720360068_3299712291.wav	D:\hc--document\all text\P8_medical\thesis_dataset\use_wav_raw\720360068\3299712291.wav	0	3	[1.0068868399, 0.0766279176, 0.2667419016, 1.2505391836, 0.7489767671, 0.8055606484]	1.00689	0.0766279	0.266742	1.25054	0.748977	0.805561
165	447	jd	cy_681723162_2458061526.wav	D:\hc--document\all text\P8_medical\thesis_dataset\use_wav_raw\681723162\2458061526.wav	0	2	[0.3060031831, 1.840719223, 1.7083367109, 0.057320457, 0.1676612794, 0.4111820161]	0.306003	1.84072	1.70834	0.0573205	0.167661	0.411182
166	1369	wz	cy_700666166_2866265612.wav	D:\hc--document\all text\P8_medical\thesis_dataset\use_wav_raw\700666166\2866265612.wav	0	3	[0.9348574281, 0.0285461377, 0.2738841474, 1.4815766811, 0.6798234582, 0.6188505292]	0.934857	0.0285461	0.273884	1.48158	0.679823	0.618851
167	1705	general	dx_88717755_27395124.wav	D:\hc--document\all text\P8_medical\thesis_dataset\use_wav_raw\88717755\27395124.wav	0	0	[1.0453141928, 0.0198089611, 0.3744881153, 0.7636759877, 1.2362141609, 0.0640211254]	1.04531	0.019809	0.374488	0.763676	1.23621	0.0640211
168	1576	jd	cy_690695634_2652282074.wav	D:\hc--document\all text\P8_medical\thesis_dataset\use_wav_raw\690695634\2652282074.wav	0	2	[0.3427351117, 1.5017114878, 1.5797072649, 0.117049031, 0.2590265572, 0.230595544]	0.342735	1.50171	1.57971	0.117049	0.259027	0.230596
169	353	jd	dx_90654848_29711141.wav	D:\hc--document\all text\P8_medical\thesis_dataset\use_wav_raw\90654848\29711141.wav	0	2	[0.4427274168, 1.7846876383, 1.5862061977, 0.157515645, 0.3613306284, 0.2957732677]	0.442727	1.78469	1.58621	0.157516	0.361331	0.295773
170	397	jd	cy_682137714_2466628016.wav	D:\hc--document\all text\P8_medical\thesis_dataset\use_wav_raw\682137714\2466628016.wav	0	2	[0.3102083504, 1.7894667387, 1.6138499975, 0.1023496166, 0.3610455096, 0.4065186679]	0.310208	1.78947	1.61385	0.10235	0.361046	0.406519
171	1564	general	cy_723758551_3376927259.wav	D:\hc--document\all text\P8_medical\thesis_dataset\use_wav_raw\723758551\3376927259.wav	0	0	[1.1276692152, 0.1422125846, 0.2984150648, 1.0193428993, 0.5959656835, 0.7238771915]	1.12767	0.142213	0.298415	1.01934	0.595966	0.723877
172	797	general	dx_90091090_28617174.wav	D:\hc--document\all text\P8_medical\thesis_dataset\use_wav_raw\90091090\28617174.wav	0	0	[1.3052117825, 0.3869405091, 0.2471487373, 0.981981039, 0.4767538607, 1.2426923513]	1.30521	0.386941	0.247149	0.981981	0.476754	1.24269
173	1534	general	dx_90412064_29494937.wav	D:\hc--document\all text\P8_medical\thesis_dataset\use_wav_raw\90412064\29494937.wav	0	0	[1.0098385811, 0.473236531, 0.633683145, 0.3463531733, 0.3027101159, 0.7923581004]	1.00984	0.473237	0.633683	0.346353	0.30271	0.792358
174	1569	general	cy_716720574_3215800305.wav	D:\hc--document\all text\P8_medical\thesis_dataset\use_wav_raw\716720574\3215800305.wav	0	0	[1.2500785589, 0.0772879124, 0.3793751001, 0.3327893615, 1.4747318029, 0.2697225809]	1.25008	0.0772879	0.379375	0.332789	1.47473	0.269723
175	1362	wz	cy_444410695_1098429480.wav	D:\hc--document\all text\P8_medical\thesis_dataset\use_wav_raw\444410695\1098429480.wav	0	3	[1.1552075148, 0.1055833921, 0.3134296834, 1.107028842, 0.6558077335, 0.8944453001]	1.15521	0.105583	0.31343	1.10703	0.655808	0.894445
176	1088	wz	cy_677628372_2368903892.wav	D:\hc--document\all text\P8_medical\thesis_dataset\use_wav_raw\677628372\2368903892.wav	0	3	[0.9465429783, 0.0034624785, 0.4346623421, 1.1994341612, 1.1746845245, 0.4211241901]	0.946543	0.00346248	0.434662	1.19943	1.17468	0.421124
177	414	general	cy_694395526_2730056928.wav	D:\hc--document\all text\P8_medical\thesis_dataset\use_wav_raw\694395526\2730056928.wav	0	0	[1.154350996, 0.1650168449, 0.2816572487, 1.0106049776, 1.4068952799, 0.5539290309]	1.15435	0.165017	0.281657	1.0106	1.4069	0.553929
178	1357	fn	cy_651708503_2069532191.wav	D:\hc--document\all text\P8_medical\thesis_dataset\use_wav_raw\651708503\2069532191.wav	0	1	[0.2203345448, 1.9939461946, 1.6905807257, 0.0817477778, 0.2535103559, 0.4048856795]	0.220335	1.99395	1.69058	0.0817478	0.25351	0.404886
179	1745	rouhe	cy_676533421_2345373356.wav	D:\hc--document\all text\P8_medical\thesis_dataset\use_wav_raw\676533421\2345373356.wav	0	4	[1.1116998196, 0.0, 0.2981210351, 0.7542583942, 1.3470745087, 0.5118822455]	1.1117	0	0.298121	0.754258	1.34707	0.511882
180	384	yl	dx_61813637_17721953.wav	D:\hc--document\all text\P8_medical\thesis_dataset\use_wav_raw\61813637\17721953.wav	0	5	[1.196626544, 0.4487157166, 0.405552119, 0.5110318661, 0.3265883029, 1.3570109606]	1.19663	0.448716	0.405552	0.511032	0.326588	1.35701
181	1189	yl	cy_679263661_2404301356.wav	D:\hc--document\all text\P8_medical\thesis_dataset\use_wav_raw\679263661\2404301356.wav	0	5	[0.1893801987, 1.9352172613, 1.7299425602, 0.0885389596, 0.1884926707, 0.4263358116]	0.18938	1.93522	1.72994	0.088539	0.188493	0.426336
182	1294	fn	cy_711883544_3109328269.wav	D:\hc--document\all text\P8_medical\thesis_dataset\use_wav_raw\711883544\3109328269.wav	0	1	[0.1926692575, 2.0621471405, 1.7124519348, 0.1166496426, 0.1186400056, 0.6153280139]	0.192669	2.06215	1.71245	0.11665	0.11864	0.615328
183	1460	fn	cy_670086964_2210218968.wav	D:\hc--document\all text\P8_medical\thesis_dataset\use_wav_raw\670086964\2210218968.wav	0	1	[0.5194468498, 1.6052780151, 1.5968962908, 0.0649263114, 0.5159395337, 0.1198950633]	0.519447	1.60528	1.5969	0.0649263	0.51594	0.119895
184	354	fn	cy_657066666_2099137499.wav	D:\hc--document\all text\P8_medical\thesis_dataset\use_wav_raw\657066666\2099137499.wav	0	1	[0.3118503392, 1.9092565775, 1.6734471321, 0.0637336448, 0.2866549194, 0.4589547217]	0.31185	1.90926	1.67345	0.0637336	0.286655	0.458955
185	355	rouhe	cy_722805386_3354344498.wav	D:\hc--document\all text\P8_medical\thesis_dataset\use_wav_raw\722805386\3354344498.wav	0	4	[1.1243642569, 0.0, 0.3585659862, 0.7154716253, 1.2451337576, 0.1169002727]	1.12436	0	0.358566	0.715472	1.24513	0.1169
186	878	jd	cy_723334167_3366469055.wav	D:\hc--document\all text\P8_medical\thesis_dataset\use_wav_raw\723334167\3366469055.wav	0	2	[0.5480762124, 1.0785259008, 1.3492885828, 0.1622468382, 0.0854982734, 0.3147992194]	0.548076	1.07853	1.34929	0.162247	0.0854983	0.314799
187	1544	jd	cy_678096592_2379022644.wav	D:\hc--document\all text\P8_medical\thesis_dataset\use_wav_raw\678096592\2379022644.wav	0	2	[1.1014916897, 0.2871289551, 0.4571845233, 0.319570452, 0.5675291419, 0.9880753756]	1.10149	0.287129	0.457185	0.31957	0.567529	0.988075
188	179	jd	dx_92936190_32373338.wav	D:\hc--document\all text\P8_medical\thesis_dataset\use_wav_raw\92936190\32373338.wav	0	2	[0.5160758495, 1.6197397709, 1.5376217365, 0.1292013526, 0.3515172005, 0.3528672755]	0.516076	1.61974	1.53762	0.129201	0.351517	0.352867
189	1571	fn	dx_89573524_28106028.wav	D:\hc--document\all text\P8_medical\thesis_dataset\use_wav_raw\89573524\28106028.wav	0	1	[0.2016098201, 1.9590096474, 1.7020690441, 0.1679926962, 0.2180511206, 0.520998776]	0.20161	1.95901	1.70207	0.167993	0.218051	0.520999
190	1699	wz	cy_698224378_2811666934.wav	D:\hc--document\all text\P8_medical\thesis_dataset\use_wav_raw\698224378\2811666934.wav	0	3	[1.3290512562, 0.1409212649, 0.2176753432, 0.8196222186, 0.7646636367, 0.9321474433]	1.32905	0.140921	0.217675	0.819622	0.764664	0.932147
191	705	rouhe	cy_660100677_2116072295.wav	D:\hc--document\all text\P8_medical\thesis_dataset\use_wav_raw\660100677\2116072295.wav	0	4	[1.2789975405, 0.0085557383, 0.1747133732, 1.0154086351, 0.5929857492, 0.8586060405]	1.279	0.00855574	0.174713	1.01541	0.592986	0.858606
192	550	fn	dx_72660323_20398681.wav	D:\hc--document\all text\P8_medical\thesis_dataset\use_wav_raw\72660323\20398681.wav	0	1	[0.4720794857, 1.6404711008, 1.4583317041, 0.2428597063, 0.3487321734, 0.5944495797]	0.472079	1.64047	1.45833	0.24286	0.348732	0.59445
193	798	fn	cy_681325538_2449998254.wav	D:\hc--document\all text\P8_medical\thesis_dataset\use_wav_raw\681325538\2449998254.wav	0	1	[1.0963497162, 0.175027594, 0.203382358, 1.2343399525, 1.331664443, 0.48018682]	1.09635	0.175028	0.203382	1.23434	1.33166	0.480187
194	1184	fn	dx_86933504_25748939.wav	D:\hc--document\all text\P8_medical\thesis_dataset\use_wav_raw\86933504\25748939.wav	0	1	[0.2454791218, 1.875810504, 1.7482067347, 0.0883605853, 0.2307790369, 0.3696240485]	0.245479	1.87581	1.74821	0.0883606	0.230779	0.369624
195	1328	wz	cy_684201707_2512051766.wav	D:\hc--document\all text\P8_medical\thesis_dataset\use_wav_raw\684201707\2512051766.wav	0	3	[1.0279977322, 0.0, 0.1913549155, 1.3915250301, 0.6923680305, 0.691732347]	1.028	0	0.191355	1.39153	0.692368	0.691732
196	237	wz	cy_684871343_2526811854.wav	D:\hc--document\all text\P8_medical\thesis_dataset\use_wav_raw\684871343\2526811854.wav	0	3	[0.2975741327, 1.8211175203, 1.608019948, 0.0744636133, 0.3654631078, 0.2151517868]	0.297574	1.82112	1.60802	0.0744636	0.365463	0.215152
197	519	wz	cy_712510924_3121640897.wav	D:\hc--document\all text\P8_medical\thesis_dataset\use_wav_raw\712510924\3121640897.wav	0	3	[1.0931537151, 0.0063950373, 0.1599937528, 1.3260332346, 0.6001204252, 0.7993223071]	1.09315	0.00639504	0.159994	1.32603	0.60012	0.799322
198	333	yl	dx_91789934_30779491.wav	D:\hc--document\all text\P8_medical\thesis_dataset\use_wav_raw\91789934\30779491.wav	0	5	[0.293240279, 1.8030296564, 1.7652288675, 0.0662661195, 0.1936021, 0.4392918944]	0.29324	1.80303	1.76523	0.0662661	0.193602	0.439292
199	937	rouhe	cy_614247237_1870354565.wav	D:\hc--document\all text\P8_medical\thesis_dataset\use_wav_raw\614247237\1870354565.wav	0	4	[1.045122385, 0.1330141723, 0.284491092, 1.2082198858, 1.2834300995, 0.3227374852]	1.04512	0.133014	0.284491	1.20822	1.28343	0.322737
200	1359	rouhe	cy_703630488_2932792126.wav	D:\hc--document\all text\P8_medical\thesis_dataset\use_wav_raw\703630488\2932792126.wav	0	4	[0.9249322414, 0.1161379591, 0.3001221418, 1.4877787828, 1.2683131695, 0.3184065223]	0.924932	0.116138	0.300122	1.48778	1.26831	0.318407
201	511	jd	dx_62798936_17159192.wav	D:\hc--document\all text\P8_medical\thesis_dataset\use_wav_raw\62798936\17159192.wav	0	2	[0.2674145103, 1.7781641483, 1.7236843109, 0.1154566407, 0.3047141731, 0.4317378104]	0.267415	1.77816	1.72368	0.115457	0.304714	0.431738
202	1643	general	cy_679641359_2412639716.wav	D:\hc--document\all text\P8_medical\thesis_dataset\use_wav_raw\679641359\2412639716.wav	0	0	[1.2529876232, 0.0967869312, 0.3414711058, 0.7789918184, 1.2911791801, 0.5338025093]	1.25299	0.0967869	0.341471	0.778992	1.29118	0.533803
203	1556	fn	cy_712140011_3114357306.wav	D:\hc--document\all text\P8_medical\thesis_dataset\use_wav_raw\712140011\3114357306.wav	0	1	[0.5209572911, 1.3752605915, 1.4839820862, 0.1360247582, 0.3025844693, 0.5995297432]	0.520957	1.37526	1.48398	0.136025	0.302584	0.59953
204	385	wz	cy_654360945_2087360213.wav	D:\hc--document\all text\P8_medical\thesis_dataset\use_wav_raw\654360945\2087360213.wav	0	3	[0.9750643373, 0.0913667083, 0.3044304252, 1.1496605873, 1.2544059753, 0.2965143025]	0.975064	0.0913667	0.30443	1.14966	1.25441	0.296514
205	1045	general	cy_703535914_2931337308.wav	D:\hc--document\all text\P8_medical\thesis_dataset\use_wav_raw\703535914\2931337308.wav	0	0	[0.7845119834, 0.6116856933, 0.9077389836, 0.2821270823, 0.2837081552, 0.648086071]	0.784512	0.611686	0.907739	0.282127	0.283708	0.648086
206	777	wz	cy_714071784_3152837321.wav	D:\hc--document\all text\P8_medical\thesis_dataset\use_wav_raw\714071784\3152837321.wav	0	3	[0.9342679381, 0.0102049895, 0.2290029228, 1.4453171492, 0.9112390876, 0.5716246963]	0.934268	0.010205	0.229003	1.44532	0.911239	0.571625
207	1121	general	cy_680917326_2441094002.wav	D:\hc--document\all text\P8_medical\thesis_dataset\use_wav_raw\680917326\2441094002.wav	0	0	[1.1297296286, 0.1918634325, 0.3959112167, 0.6796461344, 0.438549608, 1.1015738249]	1.12973	0.191863	0.395911	0.679646	0.43855	1.10157
208	1568	yl	cy_553189053_1553192969.wav	D:\hc--document\all text\P8_medical\thesis_dataset\use_wav_raw\553189053\1553192969.wav	0	5	[0.9599013329, 0.451446563, 0.7449977994, 0.3006716669, 0.6553218365, 0.5956522822]	0.959901	0.451447	0.744998	0.300672	0.655322	0.595652
209	1485	yl	cy_702469218_2905935704.wav	D:\hc--document\all text\P8_medical\thesis_dataset\use_wav_raw\702469218\2905935704.wav	0	5	[1.1025334597, 0.2782993317, 0.1827154607, 1.0566244125, 0.4872863293, 1.2264432907]	1.10253	0.278299	0.182715	1.05662	0.487286	1.22644
210	896	yl	cy_679815270_2416495694.wav	D:\hc--document\all text\P8_medical\thesis_dataset\use_wav_raw\679815270\2416495694.wav	0	5	[0.9805821776, 0.4466797709, 0.5080240369, 0.4880593717, 0.2067171782, 1.3548253775]	0.980582	0.44668	0.508024	0.488059	0.206717	1.35483
211	968	rouhe	cy_633692116_1974902246.wav	D:\hc--document\all text\P8_medical\thesis_dataset\use_wav_raw\633692116\1974902246.wav	0	4	[0.4176784158, 1.6752301455, 1.5714606047, 0.2178607136, 0.3990448415, 0.4124185443]	0.417678	1.67523	1.57146	0.217861	0.399045	0.412419
212	870	fn	cy_724191805_3387662675.wav	D:\hc--document\all text\P8_medical\thesis_dataset\use_wav_raw\724191805\3387662675.wav	0	1	[0.5063086152, 1.4830760956, 1.3939006329, 0.1777072698, 0.3980957568, 0.4542286098]	0.506309	1.48308	1.3939	0.177707	0.398096	0.454229
213	305	general	cy_684673063_2522586172.wav	D:\hc--document\all text\P8_medical\thesis_dataset\use_wav_raw\684673063\2522586172.wav	0	0	[1.2033469677, 0.0071901176, 0.2827035785, 1.0163861513, 0.6860667467, 0.7472248077]	1.20335	0.00719012	0.282704	1.01639	0.686067	0.747225
214	1156	yl	dx_91263415_30182852.wav	D:\hc--document\all text\P8_medical\thesis_dataset\use_wav_raw\91263415\30182852.wav	0	5	[1.1685931683, 0.1961473078, 0.4097216725, 0.4351812303, 0.2246475965, 1.1088758707]	1.16859	0.196147	0.409722	0.435181	0.224648	1.10888
215	164	fn	dx_84077211_28199438.wav	D:\hc--document\all text\P8_medical\thesis_dataset\use_wav_raw\84077211\28199438.wav	0	1	[0.2278824598, 1.972876668, 1.6851030588, 0.1059422418, 0.1486346126, 0.4006388187]	0.227882	1.97288	1.6851	0.105942	0.148635	0.400639
216	1761	general	dx_92182539_31496260.wav	D:\hc--document\all text\P8_medical\thesis_dataset\use_wav_raw\92182539\31496260.wav	0	0	[1.3599255085, 0.0, 0.2855170667, 0.2090094984, 1.1208839417, 0.275813818]	1.35993	0	0.285517	0.209009	1.12088	0.275814
217	381	wz	cy_696249556_2768928014.wav	D:\hc--document\all text\P8_medical\thesis_dataset\use_wav_raw\696249556\2768928014.wav	0	3	[1.1851537228, 0.0283101555, 0.1093933284, 1.2414696217, 0.2704837322, 1.0559595823]	1.18515	0.0283102	0.109393	1.24147	0.270484	1.05596
218	842	jd	cy_674567771_2304261874.wav	D:\hc--document\all text\P8_medical\thesis_dataset\use_wav_raw\674567771\2304261874.wav	0	2	[0.2275146693, 1.9589190483, 1.6928352118, 0.0998056084, 0.2182831764, 0.4080100656]	0.227515	1.95892	1.69284	0.0998056	0.218283	0.40801
219	85	general	cy_671610273_2241801158.wav	D:\hc--document\all text\P8_medical\thesis_dataset\use_wav_raw\671610273\2241801158.wav	0	0	[1.2521915436, 0.0337060727, 0.4147824049, 0.3412529528, 0.704079926, 0.7138463259]	1.25219	0.0337061	0.414782	0.341253	0.70408	0.713846
220	301	wz	dx_88164185_28089482.wav	D:\hc--document\all text\P8_medical\thesis_dataset\use_wav_raw\88164185\28089482.wav	0	3	[0.9693294764, 0.0205690097, 0.2755984068, 1.1007015705, 1.2747653723, 0.1681535691]	0.969329	0.020569	0.275598	1.1007	1.27477	0.168154
221	694	wz	dx_90887975_30374429.wav	D:\hc--document\all text\P8_medical\thesis_dataset\use_wav_raw\90887975\30374429.wav	0	3	[0.9309863448, 0.0782187283, 0.4366339743, 1.1268112659, 1.4312785864, 0.2133185416]	0.930986	0.0782187	0.436634	1.12681	1.43128	0.213319
222	1689	jd	dx_42783006_10913746.wav	D:\hc--document\all text\P8_medical\thesis_dataset\use_wav_raw\42783006\10913746.wav	0	2	[0.3125091493, 1.574601531, 1.7274622917, 0.0412965976, 0.1955479383, 0.2911202013]	0.312509	1.5746	1.72746	0.0412966	0.195548	0.29112
223	863	yl	cy_691806605_2675031612.wav	D:\hc--document\all text\P8_medical\thesis_dataset\use_wav_raw\691806605\2675031612.wav	0	5	[1.1220774651, 0.2306314409, 0.3565284312, 0.4828703105, 0.4203115702, 1.0369385481]	1.12208	0.230631	0.356528	0.48287	0.420312	1.03694
224	1421	general	dx_92462249_31819509.wav	D:\hc--document\all text\P8_medical\thesis_dataset\use_wav_raw\92462249\31819509.wav	0	0	[0.2420522422, 1.8966585398, 1.7578793764, 0.1191457585, 0.1661609709, 0.5318213105]	0.242052	1.89666	1.75788	0.119146	0.166161	0.531821
225	1737	jd	cy_724223711_3389579617.wav	D:\hc--document\all text\P8_medical\thesis_dataset\use_wav_raw\724223711\3389579617.wav	0	2	[0.2887115479, 1.769888401, 1.7799378633, 0.136333093, 0.2513007522, 0.3915069401]	0.288712	1.76989	1.77994	0.136333	0.251301	0.391507
226	1779	general	dx_90524113_29480546.wav	D:\hc--document\all text\P8_medical\thesis_dataset\use_wav_raw\90524113\29480546.wav	0	0	[0.626701355, 0.8689396977, 1.246514678, 0.2194754928, 0.2971351743, 0.4891332388]	0.626701	0.86894	1.24651	0.219475	0.297135	0.489133
227	1562	general	cy_668900069_2185888476.wav	D:\hc--document\all text\P8_medical\thesis_dataset\use_wav_raw\668900069\2185888476.wav	0	0	[1.0041894913, 0.0619985685, 0.3441126347, 1.3040480614, 1.0942622423, 0.4362140894]	1.00419	0.0619986	0.344113	1.30405	1.09426	0.436214
228	981	fn	dx_54326928_14435966.wav	D:\hc--document\all text\P8_medical\thesis_dataset\use_wav_raw\54326928\14435966.wav	0	1	[1.0388710499, 0.0245328862, 0.1998986602, 1.3448956013, 0.5250754952, 0.8123691678]	1.03887	0.0245329	0.199899	1.3449	0.525075	0.812369
229	1014	rouhe	cy_715870668_3194561052.wav	D:\hc--document\all text\P8_medical\thesis_dataset\use_wav_raw\715870668\3194561052.wav	0	4	[1.1546236277, 0.0088822022, 0.3993303776, 0.9380891919, 1.3980144262, 0.1160029396]	1.15462	0.0088822	0.39933	0.938089	1.39801	0.116003
230	1262	yl	dx_87139441_26877361.wav	D:\hc--document\all text\P8_medical\thesis_dataset\use_wav_raw\87139441\26877361.wav	0	5	[0.9655052423, 0.9935649633, 0.6397140622, 0.4534578621, 0.2526493967, 1.5430419445]	0.965505	0.993565	0.639714	0.453458	0.252649	1.54304
231	600	fn	dx_90531699_29524345.wav	D:\hc--document\all text\P8_medical\thesis_dataset\use_wav_raw\90531699\29524345.wav	0	1	[0.4235306084, 1.5835012197, 1.6322385073, 0.0632602349, 0.0852576345, 0.4452500641]	0.423531	1.5835	1.63224	0.0632602	0.0852576	0.44525
232	982	jd	cy_724096855_3385753834.wav	D:\hc--document\all text\P8_medical\thesis_dataset\use_wav_raw\724096855\3385753834.wav	0	2	[0.2524225414, 1.778039813, 1.6590229273, 0.1556891054, 0.1761390567, 0.5799271464]	0.252423	1.77804	1.65902	0.155689	0.176139	0.579927
233	81	fn	dx_48356152_12671926.wav	D:\hc--document\all text\P8_medical\thesis_dataset\use_wav_raw\48356152\12671926.wav	0	1	[0.2197545618, 1.9209399223, 1.7763359547, 0.051496651, 0.2148447335, 0.3653921783]	0.219755	1.92094	1.77634	0.0514967	0.214845	0.365392
234	532	general	cy_674323954_2299000992.wav	D:\hc--document\all text\P8_medical\thesis_dataset\use_wav_raw\674323954\2299000992.wav	0	0	[1.1510740519, 0.375097841, 0.4791582525, 0.2360268533, 0.5267413259, 0.9568861127]	1.15107	0.375098	0.479158	0.236027	0.526741	0.956886
235	518	fn	cy_670975327_2228616590.wav	D:\hc--document\all text\P8_medical\thesis_dataset\use_wav_raw\670975327\2228616590.wav	0	1	[0.3045240343, 1.7103455067, 1.4817498922, 0.1834766865, 0.2411945313, 0.8961129785]	0.304524	1.71035	1.48175	0.183477	0.241195	0.896113
236	340	jd	dx_81387033_23177790.wav	D:\hc--document\all text\P8_medical\thesis_dataset\use_wav_raw\81387033\23177790.wav	0	2	[0.3818407059, 1.720125556, 1.7169680595, 0.0720645711, 0.2634022832, 0.3831371367]	0.381841	1.72013	1.71697	0.0720646	0.263402	0.383137
237	994	fn	cy_717611825_3235293624.wav	D:\hc--document\all text\P8_medical\thesis_dataset\use_wav_raw\717611825\3235293624.wav	0	1	[0.4127610624, 1.5334612131, 1.6536332369, 0.0544143133, 0.3156290948, 0.2845583558]	0.412761	1.53346	1.65363	0.0544143	0.315629	0.284558
238	387	rouhe	dx_90602630_29426643.wav	D:\hc--document\all text\P8_medical\thesis_dataset\use_wav_raw\90602630\29426643.wav	0	4	[0.8849564791, 0.0688772202, 0.3578371406, 1.2808392048, 1.361923337, 0.3295686543]	0.884956	0.0688772	0.357837	1.28084	1.36192	0.329569
239	507	rouhe	cy_578868452_1685396744.wav	D:\hc--document\all text\P8_medical\thesis_dataset\use_wav_raw\578868452\1685396744.wav	0	4	[1.1317808628, 0.1765562892, 0.5371335149, 0.3277536631, 0.4766366184, 0.9060816169]	1.13178	0.176556	0.537134	0.327754	0.476637	0.906082
240	499	fn	cy_682250053_2469006508.wav	D:\hc--document\all text\P8_medical\thesis_dataset\use_wav_raw\682250053\2469006508.wav	0	1	[0.2079789639, 1.841458559, 1.676805377, 0.0401359759, 0.2794189751, 0.4830857217]	0.207979	1.84146	1.67681	0.040136	0.279419	0.483086
241	1663	yl	cy_714649681_3166482216.wav	D:\hc--document\all text\P8_medical\thesis_dataset\use_wav_raw\714649681\3166482216.wav	0	5	[1.1600344181, 0.0, 0.1579724997, 1.2719087601, 0.5911867023, 0.8183176517]	1.16003	0	0.157972	1.27191	0.591187	0.818318
242	111	general	cy_677459191_2365269458.wav	D:\hc--document\all text\P8_medical\thesis_dataset\use_wav_raw\677459191\2365269458.wav	0	0	[1.123126626, 0.1550105512, 0.5326814055, 0.3142451942, 0.5724574924, 0.7568861842]	1.12313	0.155011	0.532681	0.314245	0.572457	0.756886
243	63	yl	cy_692536604_2690848516.wav	D:\hc--document\all text\P8_medical\thesis_dataset\use_wav_raw\692536604\2690848516.wav	0	5	[1.0538823605, 0.7361629009, 0.4126759171, 0.673319757, 0.2745944262, 1.6144133806]	1.05388	0.736163	0.412676	0.67332	0.274594	1.61441
244	1769	fn	cy_723623232_3374737823.wav	D:\hc--document\all text\P8_medical\thesis_dataset\use_wav_raw\723623232\3374737823.wav	0	1	[0.1979249567, 1.9141439199, 1.6433233023, 0.1423841417, 0.0747033507, 0.5883607864]	0.197925	1.91414	1.64332	0.142384	0.0747034	0.588361
245	175	general	cy_231638915_396766914.wav	D:\hc--document\all text\P8_medical\thesis_dataset\use_wav_raw\231638915\396766914.wav	0	0	[0.2974636257, 1.9241981506, 1.6771367788, 0.0167417619, 0.2469434887, 0.3261866271]	0.297464	1.9242	1.67714	0.0167418	0.246943	0.326187
246	200	yl	dx_45581028_11690750.wav	D:\hc--document\all text\P8_medical\thesis_dataset\use_wav_raw\45581028\11690750.wav	0	5	[0.4173674881, 1.6158214808, 1.5822805166, 0.1176684871, 0.2859504223, 0.5117378235]	0.417367	1.61582	1.58228	0.117668	0.28595	0.511738
247	821	yl	cy_669782030_2203917866.wav	D:\hc--document\all text\P8_medical\thesis_dataset\use_wav_raw\669782030\2203917866.wav	0	5	[0.2069572806, 1.9410734177, 1.7088588476, 0.066911757, 0.2339412719, 0.4785274863]	0.206957	1.94107	1.70886	0.0669118	0.233941	0.478527
248	835	jd	cy_722168333_3339564897.wav	D:\hc--document\all text\P8_medical\thesis_dataset\use_wav_raw\722168333\3339564897.wav	0	2	[0.6441604495, 0.8085044026, 1.2416161299, 0.2253316939, 0.3678153455, 0.0638817325]	0.64416	0.808504	1.24162	0.225332	0.367815	0.0638817
249	1159	jd	cy_722007951_3336601462.wav	D:\hc--document\all text\P8_medical\thesis_dataset\use_wav_raw\722007951\3336601462.wav	0	2	[1.0797029734, 0.3818194568, 0.4799535573, 0.4744819403, 0.1685545743, 1.2264056206]	1.0797	0.381819	0.479954	0.474482	0.168555	1.22641
250	235	general	cy_640797461_2013377105.wav	D:\hc--document\all text\P8_medical\thesis_dataset\use_wav_raw\640797461\2013377105.wav	0	0	[0.6285223961, 1.2358703613, 1.4196900129, 0.1964354366, 0.3359637558, 0.2688042521]	0.628522	1.23587	1.41969	0.196435	0.335964	0.268804
251	1038	general	dx_89505854_32243195.wav	D:\hc--document\all text\P8_medical\thesis_dataset\use_wav_raw\89505854\32243195.wav	0	0	[1.129142046, 0.2123568058, 0.4236523509, 0.3682584465, 0.4217877984, 1.0025645494]	1.12914	0.212357	0.423652	0.368258	0.421788	1.00256
252	1501	wz	dx_87048170_26355219.wav	D:\hc--document\all text\P8_medical\thesis_dataset\use_wav_raw\87048170\26355219.wav	0	3	[0.8826546669, 0.099119179, 0.2709693015, 1.4766494036, 1.3312016726, 0.2428005636]	0.882655	0.0991192	0.270969	1.47665	1.3312	0.242801
253	1288	fn	cy_720202026_3295439297.wav	D:\hc--document\all text\P8_medical\thesis_dataset\use_wav_raw\720202026\3295439297.wav	0	1	[0.3009050786, 1.8621999025, 1.6297951937, 0.1526798904, 0.2062171847, 0.6404027939]	0.300905	1.8622	1.6298	0.15268	0.206217	0.640403
254	935	general	dx_90857370_29846242.wav	D:\hc--document\all text\P8_medical\thesis_dataset\use_wav_raw\90857370\29846242.wav	0	0	[1.1741800308, 0.2585974932, 0.4427592456, 0.5567547083, 0.431073159, 1.1392749548]	1.17418	0.258597	0.442759	0.556755	0.431073	1.13927
255	109	jd	dx_84002155_30493501.wav	D:\hc--document\all text\P8_medical\thesis_dataset\use_wav_raw\84002155\30493501.wav	0	2	[0.9981867075, 0.0795302391, 0.2107825279, 1.3886786699, 0.6106213331, 0.6809806824]	0.998187	0.0795302	0.210783	1.38868	0.610621	0.680981
256	154	general	cy_178002072_263063240.wav	D:\hc--document\all text\P8_medical\thesis_dataset\use_wav_raw\178002072\263063240.wav	0	0	[1.1171201468, 0.15911825, 0.4981161356, 0.3410055935, 0.6003736258, 0.7121031284]	1.11712	0.159118	0.498116	0.341006	0.600374	0.712103
257	1592	fn	cy_709863616_3069958162.wav	D:\hc--document\all text\P8_medical\thesis_dataset\use_wav_raw\709863616\3069958162.wav	0	1	[0.5742611885, 1.571259737, 1.4021279812, 0.2094515711, 0.3288963139, 0.3700606227]	0.574261	1.57126	1.40213	0.209452	0.328896	0.370061
258	1492	fn	cy_719729442_3284966700.wav	D:\hc--document\all text\P8_medical\thesis_dataset\use_wav_raw\719729442\3284966700.wav	0	1	[0.3438200057, 1.7879840136, 1.6764554977, 0.0866666958, 0.2447706014, 0.4906040132]	0.34382	1.78798	1.67646	0.0866667	0.244771	0.490604
259	1034	rouhe	dx_89688608_29283668.wav	D:\hc--document\all text\P8_medical\thesis_dataset\use_wav_raw\89688608\29283668.wav	0	4	[1.3278772831, 0.0144998552, 0.2486001551, 0.4735200703, 1.198854804, 0.4328482151]	1.32788	0.0144999	0.2486	0.47352	1.19885	0.432848
260	1028	fn	dx_84251808_26963257.wav	D:\hc--document\all text\P8_medical\thesis_dataset\use_wav_raw\84251808\26963257.wav	0	1	[0.1843245775, 1.8983079195, 1.7346343994, 0.0924030244, 0.2771527171, 0.3041054606]	0.184325	1.89831	1.73463	0.092403	0.277153	0.304105
261	1448	wz	dx_90476239_29205955.wav	D:\hc--document\all text\P8_medical\thesis_dataset\use_wav_raw\90476239\29205955.wav	0	3	[0.6082294583, 1.0324378014, 1.358332634, 0.2339125723, 0.1679343581, 0.3566201925]	0.608229	1.03244	1.35833	0.233913	0.167934	0.35662
262	581	fn	cy_638183504_1999456325.wav	D:\hc--document\all text\P8_medical\thesis_dataset\use_wav_raw\638183504\1999456325.wav	0	1	[0.3676866889, 1.7104436159, 1.5830061436, 0.1451086104, 0.3144386113, 0.5409850478]	0.367687	1.71044	1.58301	0.145109	0.314439	0.540985
263	857	rouhe	dx_89256673_31477842.wav	D:\hc--document\all text\P8_medical\thesis_dataset\use_wav_raw\89256673\31477842.wav	0	4	[1.1050161123, 0.2859893143, 0.469273299, 0.3177020848, 0.4151340723, 1.0249584913]	1.10502	0.285989	0.469273	0.317702	0.415134	1.02496
264	357	yl	cy_720922051_3312582145.wav	D:\hc--document\all text\P8_medical\thesis_dataset\use_wav_raw\720922051\3312582145.wav	0	5	[1.1601988077, 0.0839031339, 0.4706835747, 0.1525517851, 1.4781699181, 0.4008187056]	1.1602	0.0839031	0.470684	0.152552	1.47817	0.400819
265	872	wz	cy_557725682_1575050687.wav	D:\hc--document\all text\P8_medical\thesis_dataset\use_wav_raw\557725682\1575050687.wav	0	3	[0.628444016, 0.9426404834, 1.2929942608, 0.2418174148, 0.4399168491, 0.1333916336]	0.628444	0.94264	1.29299	0.241817	0.439917	0.133392
266	854	fn	cy_714315642_3158426031.wav	D:\hc--document\all text\P8_medical\thesis_dataset\use_wav_raw\714315642\3158426031.wav	0	1	[0.2301870435, 1.9999469519, 1.6747978926, 0.0673812032, 0.1581549644, 0.4474500716]	0.230187	1.99995	1.6748	0.0673812	0.158155	0.44745
267	843	fn	cy_679965519_2419859336.wav	D:\hc--document\all text\P8_medical\thesis_dataset\use_wav_raw\679965519\2419859336.wav	0	1	[0.26729545, 1.8942055702, 1.7039809227, 0.1038454697, 0.2606517076, 0.3651205003]	0.267295	1.89421	1.70398	0.103845	0.260652	0.365121
268	1147	wz	cy_167014927_236437646.wav	D:\hc--document\all text\P8_medical\thesis_dataset\use_wav_raw\167014927\236437646.wav	0	3	[1.230060339, 0.1017037928, 0.2537724078, 1.0408608913, 0.5993303061, 0.8969935775]	1.23006	0.101704	0.253772	1.04086	0.59933	0.896994
269	325	fn	cy_678157101_2380279658.wav	D:\hc--document\all text\P8_medical\thesis_dataset\use_wav_raw\678157101\2380279658.wav	0	1	[0.2926090956, 1.9523873329, 1.6852769852, 0.088711977, 0.2193245739, 0.4311815202]	0.292609	1.95239	1.68528	0.088712	0.219325	0.431182
270	1773	yl	dx_89859674_28625320.wav	D:\hc--document\all text\P8_medical\thesis_dataset\use_wav_raw\89859674\28625320.wav	0	5	[1.1953847408, 0.2046882957, 0.4345297217, 0.5265570879, 0.5152747631, 1.1531686783]	1.19538	0.204688	0.43453	0.526557	0.515275	1.15317
271	496	yl	cy_628762791_1947990233.wav	D:\hc--document\all text\P8_medical\thesis_dataset\use_wav_raw\628762791\1947990233.wav	0	5	[1.1612814665, 0.2867770493, 0.3922662139, 0.5763098598, 0.3261812329, 1.2090375423]	1.16128	0.286777	0.392266	0.57631	0.326181	1.20904
272	828	wz	cy_687532443_2583756114.wav	D:\hc--document\all text\P8_medical\thesis_dataset\use_wav_raw\687532443\2583756114.wav	0	3	[1.3777571917, 0.002598926, 0.1603415459, 0.8281766772, 0.9598114491, 0.7732069492]	1.37776	0.00259893	0.160342	0.828177	0.959811	0.773207
273	604	wz	dx_87010433_26178295.wav	D:\hc--document\all text\P8_medical\thesis_dataset\use_wav_raw\87010433\26178295.wav	0	3	[1.0697945356, 0.1509067714, 0.463180989, 0.3923522234, 1.215646863, 0.4989838898]	1.06979	0.150907	0.463181	0.392352	1.21565	0.498984
274	380	rouhe	cy_717330981_3228284513.wav	D:\hc--document\all text\P8_medical\thesis_dataset\use_wav_raw\717330981\3228284513.wav	0	4	[1.2366176844, 0.068764776, 0.2952164412, 0.5387270451, 1.5275074244, 0.374399066]	1.23662	0.0687648	0.295216	0.538727	1.52751	0.374399
275	1370	wz	cy_722937484_3357845896.wav	D:\hc--document\all text\P8_medical\thesis_dataset\use_wav_raw\722937484\3357845896.wav	0	3	[0.9152501225, 0.0574343503, 0.2475708127, 1.3996737003, 1.3655155897, 0.2425901741]	0.91525	0.0574344	0.247571	1.39967	1.36552	0.24259
276	1651	rouhe	cy_711399245_3100341250.wav	D:\hc--document\all text\P8_medical\thesis_dataset\use_wav_raw\711399245\3100341250.wav	0	4	[1.1715056896, 0.0, 0.4413959086, 0.2482167333, 1.4981241226, 0.3005430698]	1.17151	0	0.441396	0.248217	1.49812	0.300543
277	427	rouhe	cy_714480587_3162254616.wav	D:\hc--document\all text\P8_medical\thesis_dataset\use_wav_raw\714480587\3162254616.wav	0	4	[0.7032603025, 1.0092303753, 1.0145089626, 0.2680978179, 0.3318403661, 0.843174696]	0.70326	1.00923	1.01451	0.268098	0.33184	0.843175
278	809	fn	cy_676829726_2352892022.wav	D:\hc--document\all text\P8_medical\thesis_dataset\use_wav_raw\676829726\2352892022.wav	0	1	[0.2322818786, 1.8281906843, 1.6819229126, 0.1250874102, 0.2857804596, 0.4925588965]	0.232282	1.82819	1.68192	0.125087	0.28578	0.492559
279	625	fn	cy_679263680_2404295116.wav	D:\hc--document\all text\P8_medical\thesis_dataset\use_wav_raw\679263680\2404295116.wav	0	1	[1.1341766119, 0.4897295237, 0.3721016645, 0.6704089046, 0.5643268228, 1.4662544727]	1.13418	0.48973	0.372102	0.670409	0.564327	1.46625
280	1508	rouhe	cy_668274596_2173061324.wav	D:\hc--document\all text\P8_medical\thesis_dataset\use_wav_raw\668274596\2173061324.wav	0	4	[1.2397196293, 0.0637920424, 0.3388943076, 0.9150148034, 0.7200517654, 0.8321540356]	1.23972	0.063792	0.338894	0.915015	0.720052	0.832154
281	1488	fn	cy_671010187_2229322294.wav	D:\hc--document\all text\P8_medical\thesis_dataset\use_wav_raw\671010187\2229322294.wav	0	1	[0.2072213441, 1.8624918461, 1.7229290009, 0.1100065932, 0.3037420809, 0.3739100695]	0.207221	1.86249	1.72293	0.110007	0.303742	0.37391
282	308	jd	cy_720134895_3293790264.wav	D:\hc--document\all text\P8_medical\thesis_dataset\use_wav_raw\720134895\3293790264.wav	0	2	[0.4481609166, 1.3736951351, 1.4323574305, 0.2066088766, 0.3113718033, 0.1726902723]	0.448161	1.3737	1.43236	0.206609	0.311372	0.17269
283	1247	jd	cy_724418280_3392933683.wav	D:\hc--document\all text\P8_medical\thesis_dataset\use_wav_raw\724418280\3392933683.wav	0	2	[0.4708071649, 1.0667672157, 1.2876359224, 0.1966161579, 0.1657091379, 0.5928770304]	0.470807	1.06677	1.28764	0.196616	0.165709	0.592877
284	691	jd	cy_674296546_2298440810.wav	D:\hc--document\all text\P8_medical\thesis_dataset\use_wav_raw\674296546\2298440810.wav	0	2	[0.485860467, 1.5792092085, 1.6113824844, 0.1165278926, 0.400875628, 0.2443325967]	0.48586	1.57921	1.61138	0.116528	0.400876	0.244333
285	148	yl	dx_92496854_31971537.wav	D:\hc--document\all text\P8_medical\thesis_dataset\use_wav_raw\92496854\31971537.wav	0	5	[0.5860245824, 1.1516368389, 1.3200166225, 0.2674000561, 0.2049920857, 0.4205678403]	0.586025	1.15164	1.32002	0.2674	0.204992	0.420568
286	838	rouhe	cy_682776396_2480656528.wav	D:\hc--document\all text\P8_medical\thesis_dataset\use_wav_raw\682776396\2480656528.wav	0	4	[1.0617133379, 0.1530566961, 0.625823617, 0.1158354431, 1.1007025242, 0.2984060347]	1.06171	0.153057	0.625824	0.115835	1.1007	0.298406
287	1144	rouhe	cy_724337314_3391415371.wav	D:\hc--document\all text\P8_medical\thesis_dataset\use_wav_raw\724337314\3391415371.wav	0	4	[0.9431073666, 0.0788452774, 0.20368357, 1.4941380024, 1.2463954687, 0.2881808877]	0.943107	0.0788453	0.203684	1.49414	1.2464	0.288181
288	958	general	cy_684210998_2512301356.wav	D:\hc--document\all text\P8_medical\thesis_dataset\use_wav_raw\684210998\2512301356.wav	0	0	[0.9989981651, 0.0010441069, 0.2786860764, 1.3559323549, 0.5939716101, 0.7811732292]	0.998998	0.00104411	0.278686	1.35593	0.593972	0.781173
289	1164	jd	cy_719319967_3274458337.wav	D:\hc--document\all text\P8_medical\thesis_dataset\use_wav_raw\719319967\3274458337.wav	0	2	[0.237183854, 2.0351965427, 1.7029780149, 0.0834776089, 0.2601989806, 0.377415359]	0.237184	2.0352	1.70298	0.0834776	0.260199	0.377415
290	1353	fn	dx_89119199_27767943.wav	D:\hc--document\all text\P8_medical\thesis_dataset\use_wav_raw\89119199\27767943.wav	0	1	[0.2215366811, 2.0100669861, 1.6696267128, 0.1201918274, 0.1900407821, 0.5514389873]	0.221537	2.01007	1.66963	0.120192	0.190041	0.551439
291	1032	fn	cy_675784808_2329833612.wav	D:\hc--document\all text\P8_medical\thesis_dataset\use_wav_raw\675784808\2329833612.wav	0	1	[0.2368880659, 2.0402104855, 1.6703801155, 0.1199422404, 0.2206228077, 0.4632753432]	0.236888	2.04021	1.67038	0.119942	0.220623	0.463275
292	768	wz	cy_684346641_2515340536.wav	D:\hc--document\all text\P8_medical\thesis_dataset\use_wav_raw\684346641\2515340536.wav	0	3	[0.992375493, 0.0194405317, 0.2235846967, 1.3172395229, 0.9371276498, 0.5385308862]	0.992375	0.0194405	0.223585	1.31724	0.937128	0.538531
293	1740	fn	cy_557354795_1573266251.wav	D:\hc--document\all text\P8_medical\thesis_dataset\use_wav_raw\557354795\1573266251.wav	0	1	[0.1862089187, 1.982843399, 1.7293548584, 0.0856982395, 0.2037653774, 0.5600501895]	0.186209	1.98284	1.72935	0.0856982	0.203765	0.56005
294	595	general	cy_717083340_3223857401.wav	D:\hc--document\all text\P8_medical\thesis_dataset\use_wav_raw\717083340\3223857401.wav	0	0	[0.2381258905, 1.957834959, 1.7264721394, 0.088882871, 0.1163604558, 0.5284507871]	0.238126	1.95783	1.72647	0.0888829	0.11636	0.528451
295	1669	rouhe	cy_718792605_3262834370.wav	D:\hc--document\all text\P8_medical\thesis_dataset\use_wav_raw\718792605\3262834370.wav	0	4	[1.2731052637, 0.02263771, 0.3030337095, 0.3193143606, 1.4905643463, 0.2295399308]	1.27311	0.0226377	0.303034	0.319314	1.49056	0.22954
296	1518	fn	cy_683374276_2495081380.wav	D:\hc--document\all text\P8_medical\thesis_dataset\use_wav_raw\683374276\2495081380.wav	0	1	[0.4374830127, 1.6812367439, 1.6121408939, 0.1696746349, 0.4242767096, 0.3612349629]	0.437483	1.68124	1.61214	0.169675	0.424277	0.361235
297	788	rouhe	cy_716901975_3220117556.wav	D:\hc--document\all text\P8_medical\thesis_dataset\use_wav_raw\716901975\3220117556.wav	0	4	[1.1103807688, 0.0, 0.2421262115, 1.0109111071, 1.2350261211, 0.3348703384]	1.11038	0	0.242126	1.01091	1.23503	0.33487
298	525	rouhe	cy_718109112_3247782714.wav	D:\hc--document\all text\P8_medical\thesis_dataset\use_wav_raw\718109112\3247782714.wav	0	4	[1.258628726, 0.035641782, 0.3727177978, 0.3233760893, 1.4785081148, 0.3693546951]	1.25863	0.0356418	0.372718	0.323376	1.47851	0.369355
299	1566	rouhe	cy_678973671_2397938898.wav	D:\hc--document\all text\P8_medical\thesis_dataset\use_wav_raw\678973671\2397938898.wav	0	4	[0.3457815945, 1.7741687298, 1.6467499733, 0.1060516015, 0.2739521861, 0.3677625358]	0.345782	1.77417	1.64675	0.106052	0.273952	0.367763
300	260	rouhe	cy_569701410_1635925481.wav	D:\hc--document\all text\P8_medical\thesis_dataset\use_wav_raw\569701410\1635925481.wav	0	4	[1.0200078487, 0.0043924362, 0.205129832, 1.2249826193, 1.0641462803, 0.3987308145]	1.02001	0.00439244	0.20513	1.22498	1.06415	0.398731
301	1455	rouhe	cy_705589852_2980479842.wav	D:\hc--document\all text\P8_medical\thesis_dataset\use_wav_raw\705589852\2980479842.wav	0	4	[1.3252847195, 0.0785868391, 0.2692453861, 0.3934619725, 1.3143365383, 0.4808460176]	1.32528	0.0785868	0.269245	0.393462	1.31434	0.480846
302	1554	general	dx_90981972_29887152.wav	D:\hc--document\all text\P8_medical\thesis_dataset\use_wav_raw\90981972\29887152.wav	0	0	[1.1098043919, 0.2063616365, 0.425636977, 0.3071051836, 0.5940007567, 0.8399682045]	1.1098	0.206362	0.425637	0.307105	0.594001	0.839968
303	1714	yl	dx_90703386_29687526.wav	D:\hc--document\all text\P8_medical\thesis_dataset\use_wav_raw\90703386\29687526.wav	0	5	[0.740406692, 0.8292202353, 1.0549838543, 0.2464430034, 0.1575358808, 0.7424277067]	0.740407	0.82922	1.05498	0.246443	0.157536	0.742428
304	662	jd	cy_9823952_8902461.wav	D:\hc--document\all text\P8_medical\thesis_dataset\use_wav_raw\9823952\8902461.wav	0	2	[0.3077864647, 1.7655115128, 1.7353521585, 0.1193535998, 0.3710710406, 0.289593488]	0.307786	1.76551	1.73535	0.119354	0.371071	0.289593
305	1082	wz	cy_720824072_3309509147.wav	D:\hc--document\all text\P8_medical\thesis_dataset\use_wav_raw\720824072\3309509147.wav	0	3	[0.8029187322, 0.0629094318, 0.2613548934, 1.4651978016, 1.2452651262, 0.3182342052]	0.802919	0.0629094	0.261355	1.4652	1.24527	0.318234
306	939	general	cy_724394410_3393030175.wav	D:\hc--document\all text\P8_medical\thesis_dataset\use_wav_raw\724394410\3393030175.wav	0	0	[1.2069765329, 0.0154639799, 0.3758494556, 0.2725333273, 1.4845635891, 0.323310554]	1.20698	0.015464	0.375849	0.272533	1.48456	0.323311
307	1444	wz	cy_724781603_3401549997.wav	D:\hc--document\all text\P8_medical\thesis_dataset\use_wav_raw\724781603\3401549997.wav	0	3	[0.9959204793, 0.081894666, 0.2021693736, 1.3821229935, 0.6692774296, 0.7931412458]	0.99592	0.0818947	0.202169	1.38212	0.669277	0.793141
308	627	rouhe	cy_714107978_3153998281.wav	D:\hc--document\all text\P8_medical\thesis_dataset\use_wav_raw\714107978\3153998281.wav	0	4	[0.9563344121, 0.1070331484, 0.3582339585, 1.1573836803, 1.486954689, 0.31434986]	0.956334	0.107033	0.358234	1.15738	1.48695	0.31435
309	1163	rouhe	cy_703444340_2928317668.wav	D:\hc--document\all text\P8_medical\thesis_dataset\use_wav_raw\703444340\2928317668.wav	0	4	[1.2947148085, 0.0, 0.4229351878, 0.1969179213, 1.3456282616, 0.2122185081]	1.29471	0	0.422935	0.196918	1.34563	0.212219
310	1513	yl	cy_689474307_2626046936.wav	D:\hc--document\all text\P8_medical\thesis_dataset\use_wav_raw\689474307\2626046936.wav	0	5	[0.9947068095, 0.4419744313, 0.5940386653, 0.2915931344, 0.1455051452, 1.1879591942]	0.994707	0.441974	0.594039	0.291593	0.145505	1.18796
311	800	wz	cy_696816418_2781361922.wav	D:\hc--document\all text\P8_medical\thesis_dataset\use_wav_raw\696816418\2781361922.wav	0	3	[0.9407269955, 0.1371334195, 0.1932463646, 1.4350306988, 1.1245088577, 0.2601374388]	0.940727	0.137133	0.193246	1.43503	1.12451	0.260137
312	508	yl	dx_90868904_30243397.wav	D:\hc--document\all text\P8_medical\thesis_dataset\use_wav_raw\90868904\30243397.wav	0	5	[0.7389154434, 0.9580385685, 1.0296057463, 0.2298041582, 0.2777096629, 0.8124001622]	0.738915	0.958039	1.02961	0.229804	0.27771	0.8124
313	510	yl	cy_723261882_3365421612.wav	D:\hc--document\all text\P8_medical\thesis_dataset\use_wav_raw\723261882\3365421612.wav	0	5	[1.014218688, 0.1363882571, 0.2076672316, 1.3759832382, 0.3772463799, 0.8897765279]	1.01422	0.136388	0.207667	1.37598	0.377246	0.889777
314	214	fn	cy_688617282_2607351898.wav	D:\hc--document\all text\P8_medical\thesis_dataset\use_wav_raw\688617282\2607351898.wav	0	1	[0.2708254457, 1.7441855669, 1.7012858391, 0.0592827015, 0.3188267946, 0.3681161702]	0.270825	1.74419	1.70129	0.0592827	0.318827	0.368116
315	1089	general	dx_86293751_24754292.wav	D:\hc--document\all text\P8_medical\thesis_dataset\use_wav_raw\86293751\24754292.wav	0	0	[1.2037912607, 0.0, 0.3315579593, 0.5241371989, 1.4579379559, 0.3072366118]	1.20379	0	0.331558	0.524137	1.45794	0.307237
316	1358	yl	cy_714646789_3166249499.wav	D:\hc--document\all text\P8_medical\thesis_dataset\use_wav_raw\714646789\3166249499.wav	0	5	[0.404432267, 1.7828124762, 1.4195605516, 0.2232611775, 0.1982390434, 0.8546696901]	0.404432	1.78281	1.41956	0.223261	0.198239	0.85467
317	950	general	dx_88165063_28098061.wav	D:\hc--document\all text\P8_medical\thesis_dataset\use_wav_raw\88165063\28098061.wav	0	0	[1.0095672607, 0.0193568226, 0.3924780488, 0.6587499976, 1.4121687412, 0.122111924]	1.00957	0.0193568	0.392478	0.65875	1.41217	0.122112
318	1598	jd	cy_696855598_2781371748.wav	D:\hc--document\all text\P8_medical\thesis_dataset\use_wav_raw\696855598\2781371748.wav	0	2	[0.645375073, 0.7668343186, 1.2635555267, 0.1330795437, 0.5699728131, 0.0914015397]	0.645375	0.766834	1.26356	0.13308	0.569973	0.0914015
319	116	wz	cy_684042881_2508663428.wav	D:\hc--document\all text\P8_medical\thesis_dataset\use_wav_raw\684042881\2508663428.wav	0	3	[0.9629194736, 0.1345599741, 0.2298436165, 1.3391141891, 0.4719775915, 1.0041223764]	0.962919	0.13456	0.229844	1.33911	0.471978	1.00412
320	202	jd	cy_165279590_231853607.wav	D:\hc--document\all text\P8_medical\thesis_dataset\use_wav_raw\165279590\231853607.wav	0	2	[0.2428007275, 1.9808139801, 1.6737327576, 0.1538527608, 0.2325003743, 0.4618867636]	0.242801	1.98081	1.67373	0.153853	0.2325	0.461887
321	887	yl	dx_87238779_25051491.wav	D:\hc--document\all text\P8_medical\thesis_dataset\use_wav_raw\87238779\25051491.wav	0	5	[1.0056763887, 0.9321086407, 0.5613555312, 0.6574833393, 0.2388867438, 1.745308876]	1.00568	0.932109	0.561356	0.657483	0.238887	1.74531
322	659	jd	dx_78721679_22426977.wav	D:\hc--document\all text\P8_medical\thesis_dataset\use_wav_raw\78721679\22426977.wav	0	2	[0.9030607939, 0.5397312641, 0.8073797822, 0.2134442329, 0.5589811206, 0.6356710792]	0.903061	0.539731	0.80738	0.213444	0.558981	0.635671
323	772	wz	dx_51539147_13513937.wav	D:\hc--document\all text\P8_medical\thesis_dataset\use_wav_raw\51539147\13513937.wav	0	3	[0.858252883, 0.111492835, 0.3078427911, 1.4121248722, 1.2256569862, 0.3722134829]	0.858253	0.111493	0.307843	1.41212	1.22566	0.372213
324	475	yl	dx_57593707_15586735.wav	D:\hc--document\all text\P8_medical\thesis_dataset\use_wav_raw\57593707\15586735.wav	0	5	[0.9528483152, 0.6765804887, 0.6731575131, 0.4511618912, 0.4293361902, 1.5160919428]	0.952848	0.67658	0.673158	0.451162	0.429336	1.51609
325	1143	jd	cy_717345053_3229363611.wav	D:\hc--document\all text\P8_medical\thesis_dataset\use_wav_raw\717345053\3229363611.wav	0	2	[0.1696722209, 2.0194449425, 1.7045471668, 0.1057182848, 0.1321846247, 0.4817877114]	0.169672	2.01944	1.70455	0.105718	0.132185	0.481788
326	1619	general	cy_711443760_3101068936.wav	D:\hc--document\all text\P8_medical\thesis_dataset\use_wav_raw\711443760\3101068936.wav	0	0	[1.2507373095, 0.0, 0.3609652519, 0.3134736717, 1.5237727165, 0.3328762054]	1.25074	0	0.360965	0.313474	1.52377	0.332876
327	408	general	cy_720725047_3306719914.wav	D:\hc--document\all text\P8_medical\thesis_dataset\use_wav_raw\720725047\3306719914.wav	0	0	[1.349293232, 0.2218193263, 0.237335071, 0.7089891434, 0.886086762, 0.8537347913]	1.34929	0.221819	0.237335	0.708989	0.886087	0.853735
328	266	wz	cy_720748709_3308734289.wav	D:\hc--document\all text\P8_medical\thesis_dataset\use_wav_raw\720748709\3308734289.wav	0	3	[0.8820474148, 0.0470915139, 0.2639643252, 1.5350283384, 1.1348352432, 0.3433018327]	0.882047	0.0470915	0.263964	1.53503	1.13484	0.343302
329	227	general	dx_89120853_27780727.wav	D:\hc--document\all text\P8_medical\thesis_dataset\use_wav_raw\89120853\27780727.wav	0	0	[1.0954681635, 0.0, 0.1809553951, 1.2496547699, 0.8092218041, 0.5875499249]	1.09547	0	0.180955	1.24965	0.809222	0.58755
330	324	rouhe	cy_715608565_3189007481.wav	D:\hc--document\all text\P8_medical\thesis_dataset\use_wav_raw\715608565\3189007481.wav	0	4	[0.9817492366, 0.0816605389, 0.2343037874, 1.4268676043, 0.7839793563, 0.601696372]	0.981749	0.0816605	0.234304	1.42687	0.783979	0.601696
331	1097	rouhe	cy_724050512_3383989705.wav	D:\hc--document\all text\P8_medical\thesis_dataset\use_wav_raw\724050512\3383989705.wav	0	4	[1.2841387987, 0.0389147773, 0.1932599992, 0.8710969687, 1.3024674654, 0.5619001389]	1.28414	0.0389148	0.19326	0.871097	1.30247	0.5619
332	830	general	cy_724596878_3393649036.wav	D:\hc--document\all text\P8_medical\thesis_dataset\use_wav_raw\724596878\3393649036.wav	0	0	[1.2548623085, 0.0, 0.3956108987, 0.2249937207, 0.985706687, 0.459082514]	1.25486	0	0.395611	0.224994	0.985707	0.459083
333	1735	wz	cy_715069070_3176003058.wav	D:\hc--document\all text\P8_medical\thesis_dataset\use_wav_raw\715069070\3176003058.wav	0	3	[0.9373604655, 0.0312880278, 0.3611018956, 1.2703119516, 1.2563006878, 0.2818340361]	0.93736	0.031288	0.361102	1.27031	1.2563	0.281834
334	1489	wz	dx_75388257_21267395.wav	D:\hc--document\all text\P8_medical\thesis_dataset\use_wav_raw\75388257\21267395.wav	0	3	[0.9271935225, 0.0, 0.2349938452, 1.3477391005, 0.6386067867, 0.8437446356]	0.927194	0	0.234994	1.34774	0.638607	0.843745
335	426	yl	dx_90846377_29784492.wav	D:\hc--document\all text\P8_medical\thesis_dataset\use_wav_raw\90846377\29784492.wav	0	5	[1.1528351307, 0.2883747518, 0.4496773481, 0.3607138395, 0.2436551452, 1.2042425871]	1.15284	0.288375	0.449677	0.360714	0.243655	1.20424
336	429	wz	cy_705249812_2970855652.wav	D:\hc--document\all text\P8_medical\thesis_dataset\use_wav_raw\705249812\2970855652.wav	0	3	[0.8819659352, 0.0988370553, 0.2893363237, 1.5491238832, 0.9223600626, 0.5321742296]	0.881966	0.0988371	0.289336	1.54912	0.92236	0.532174
337	1084	general	cy_710544297_3083726029.wav	D:\hc--document\all text\P8_medical\thesis_dataset\use_wav_raw\710544297\3083726029.wav	0	0	[1.141323328, 0.1442954838, 0.4095025659, 0.3695379496, 0.805644691, 0.7370244265]	1.14132	0.144295	0.409503	0.369538	0.805645	0.737024
338	1319	rouhe	cy_676607237_2346910710.wav	D:\hc--document\all text\P8_medical\thesis_dataset\use_wav_raw\676607237\2346910710.wav	0	4	[1.1835734844, 0.0, 0.4311957657, 0.2179366052, 1.3500609398, 0.1922160834]	1.18357	0	0.431196	0.217937	1.35006	0.192216
339	472	yl	cy_685165516_2532353842.wav	D:\hc--document\all text\P8_medical\thesis_dataset\use_wav_raw\685165516\2532353842.wav	0	5	[0.9314227104, 0.4573924243, 0.7295517325, 0.2948571444, 0.3286420405, 0.8616365194]	0.931423	0.457392	0.729552	0.294857	0.328642	0.861637
340	1199	yl	cy_563370633_1602906065.wav	D:\hc--document\all text\P8_medical\thesis_dataset\use_wav_raw\563370633\1602906065.wav	0	5	[1.1301771402, 0.3589717746, 0.2393376678, 0.8461025953, 0.2125522047, 1.4663690329]	1.13018	0.358972	0.239338	0.846103	0.212552	1.46637
341	1048	wz	cy_594080135_1766260394.wav	D:\hc--document\all text\P8_medical\thesis_dataset\use_wav_raw\594080135\1766260394.wav	0	3	[0.9823069572, 0.070853807, 0.2946451604, 1.3706957102, 0.8088006973, 0.7284532785]	0.982307	0.0708538	0.294645	1.3707	0.808801	0.728453
342	147	rouhe	cy_566097108_1617058052.wav	D:\hc--document\all text\P8_medical\thesis_dataset\use_wav_raw\566097108\1617058052.wav	0	4	[1.0663194656, 0.7535209656, 0.4036926925, 0.7454214692, 0.3586747348, 1.5981888771]	1.06632	0.753521	0.403693	0.745421	0.358675	1.59819
343	987	general	cy_701802966_2891253310.wav	D:\hc--document\all text\P8_medical\thesis_dataset\use_wav_raw\701802966\2891253310.wav	0	0	[1.0662409067, 0.1156695485, 0.2383249104, 1.2103780508, 0.6097984314, 0.7999602556]	1.06624	0.11567	0.238325	1.21038	0.609798	0.79996
344	875	rouhe	cy_557457733_1573759847.wav	D:\hc--document\all text\P8_medical\thesis_dataset\use_wav_raw\557457733\1573759847.wav	0	4	[1.1828727722, 0.0, 0.451990366, 0.2527693808, 1.3934671879, 0.3073463738]	1.18287	0	0.45199	0.252769	1.39347	0.307346
345	222	yl	cy_632962808_1970830577.wav	D:\hc--document\all text\P8_medical\thesis_dataset\use_wav_raw\632962808\1970830577.wav	0	5	[1.1609890461, 0.4011050463, 0.3062876463, 0.7299779058, 0.430080235, 1.4621887207]	1.16099	0.401105	0.306288	0.729978	0.43008	1.46219
346	1379	general	dx_57498113_15513710.wav	D:\hc--document\all text\P8_medical\thesis_dataset\use_wav_raw\57498113\15513710.wav	0	0	[1.2939180136, 0.0, 0.3186850846, 0.267847538, 1.1259542704, 0.3395492136]	1.29392	0	0.318685	0.267848	1.12595	0.339549
347	1373	jd	dx_54797222_14547171.wav	D:\hc--document\all text\P8_medical\thesis_dataset\use_wav_raw\54797222\14547171.wav	0	2	[0.3887578845, 1.7640705109, 1.6362012625, 0.129278332, 0.3009557426, 0.3714122474]	0.388758	1.76407	1.6362	0.129278	0.300956	0.371412
348	1150	jd	cy_582347865_1703991221.wav	D:\hc--document\all text\P8_medical\thesis_dataset\use_wav_raw\582347865\1703991221.wav	0	2	[0.4631481767, 1.1724085808, 1.5135816336, 0.1281028986, 0.4037731588, 0.0286160316]	0.463148	1.17241	1.51358	0.128103	0.403773	0.028616
349	909	rouhe	cy_717761239_3238139748.wav	D:\hc--document\all text\P8_medical\thesis_dataset\use_wav_raw\717761239\3238139748.wav	0	4	[1.2822841406, 0.0, 0.3212259412, 0.1594911963, 1.4025329351, 0.2443347275]	1.28228	0	0.321226	0.159491	1.40253	0.244335
350	1311	yl	cy_717112104_3223842846.wav	D:\hc--document\all text\P8_medical\thesis_dataset\use_wav_raw\717112104\3223842846.wav	0	5	[1.0480964184, 0.6298001409, 0.3237564266, 0.9120746255, 0.4716391861, 1.573687315]	1.0481	0.6298	0.323756	0.912075	0.471639	1.57369
351	1210	wz	cy_690111432_2639575104.wav	D:\hc--document\all text\P8_medical\thesis_dataset\use_wav_raw\690111432\2639575104.wav	0	3	[0.9804849625, 0.1751603633, 0.3267144263, 1.3727962971, 1.40800488, 0.3678106666]	0.980485	0.17516	0.326714	1.3728	1.408	0.367811
352	1664	general	dx_89418155_27913531.wav	D:\hc--document\all text\P8_medical\thesis_dataset\use_wav_raw\89418155\27913531.wav	0	0	[1.109364152, 0.0603486598, 0.1589682549, 1.2291458845, 0.3972443342, 1.0648390055]	1.10936	0.0603487	0.158968	1.22915	0.397244	1.06484
353	1364	wz	dx_86952035_25855325.wav	D:\hc--document\all text\P8_medical\thesis_dataset\use_wav_raw\86952035\25855325.wav	0	3	[0.9721626043, 0.0, 0.27010566, 1.3285577297, 0.8047270775, 0.3641665578]	0.972163	0	0.270106	1.32856	0.804727	0.364167
354	1187	fn	cy_674288176_2298256550.wav	D:\hc--document\all text\P8_medical\thesis_dataset\use_wav_raw\674288176\2298256550.wav	0	1	[0.253852278, 1.7712613344, 1.7260998487, 0.0894098133, 0.1875122637, 0.5144750476]	0.253852	1.77126	1.7261	0.0894098	0.187512	0.514475
355	1522	rouhe	cy_628685323_1947532604.wav	D:\hc--document\all text\P8_medical\thesis_dataset\use_wav_raw\628685323\1947532604.wav	0	4	[1.1583639383, 0.0410782993, 0.3358046114, 0.3327894211, 1.1126718521, 0.4522507191]	1.15836	0.0410783	0.335805	0.332789	1.11267	0.452251
356	521	jd	dx_91936028_30918011.wav	D:\hc--document\all text\P8_medical\thesis_dataset\use_wav_raw\91936028\30918011.wav	0	2	[0.9042670727, 0.4395411611, 0.7059060335, 0.259090513, 0.371684581, 1.1015766859]	0.904267	0.439541	0.705906	0.259091	0.371685	1.10158
357	180	rouhe	cy_723946961_3380778760.wav	D:\hc--document\all text\P8_medical\thesis_dataset\use_wav_raw\723946961\3380778760.wav	0	4	[0.892831862, 0.0631392002, 0.3208789229, 1.3469529152, 1.4613577127, 0.2718952894]	0.892832	0.0631392	0.320879	1.34695	1.46136	0.271895
358	892	general	cy_671188132_2233088288.wav	D:\hc--document\all text\P8_medical\thesis_dataset\use_wav_raw\671188132\2233088288.wav	0	0	[1.0077420473, 0.435293138, 0.5624617338, 0.3686792254, 0.243159622, 1.2481284142]	1.00774	0.435293	0.562462	0.368679	0.24316	1.24813
359	640	general	cy_704438342_2951425164.wav	D:\hc--document\all text\P8_medical\thesis_dataset\use_wav_raw\704438342\2951425164.wav	0	0	[1.2375915051, 0.1994567811, 0.3182659745, 0.4481247067, 1.4719786644, 0.4257947803]	1.23759	0.199457	0.318266	0.448125	1.47198	0.425795
360	143	jd	cy_672623566_2262992614.wav	D:\hc--document\all text\P8_medical\thesis_dataset\use_wav_raw\672623566\2262992614.wav	0	2	[0.5232578516, 1.4697993994, 1.604569912, 0.0624850653, 0.3034960926, 0.1897567511]	0.523258	1.4698	1.60457	0.0624851	0.303496	0.189757
361	1261	jd	cy_431828810_1052612511.wav	D:\hc--document\all text\P8_medical\thesis_dataset\use_wav_raw\431828810\1052612511.wav	0	2	[1.0442612171, 0.167489022, 0.5747350454, 0.2332953364, 0.5067074895, 0.6908464432]	1.04426	0.167489	0.574735	0.233295	0.506707	0.690846
362	1647	jd	cy_723934593_3381264689.wav	D:\hc--document\all text\P8_medical\thesis_dataset\use_wav_raw\723934593\3381264689.wav	0	2	[0.2668456435, 1.6681288481, 1.803694129, 0.0215857606, 0.2401948571, 0.2503797412]	0.266846	1.66813	1.80369	0.0215858	0.240195	0.25038
363	254	general	cy_681879347_2462085388.wav	D:\hc--document\all text\P8_medical\thesis_dataset\use_wav_raw\681879347\2462085388.wav	0	0	[1.3503987789, 0.305894345, 0.3122505248, 0.7567238808, 0.8778110147, 1.0270311832]	1.3504	0.305894	0.312251	0.756724	0.877811	1.02703
364	1123	jd	cy_223230944_373348695.wav	D:\hc--document\all text\P8_medical\thesis_dataset\use_wav_raw\223230944\373348695.wav	0	2	[0.3600173295, 1.4603747129, 1.7080628872, 0.0750511512, 0.4052504897, 0.0910899639]	0.360017	1.46037	1.70806	0.0750512	0.40525	0.09109
365	1589	fn	dx_17800682_8068582.wav	D:\hc--document\all text\P8_medical\thesis_dataset\use_wav_raw\17800682\8068582.wav	0	1	[0.293580085, 1.7974241972, 1.6612788439, 0.1813728511, 0.2689244151, 0.4261335433]	0.29358	1.79742	1.66128	0.181373	0.268924	0.426134
366	411	general	cy_721134858_3316808966.wav	D:\hc--document\all text\P8_medical\thesis_dataset\use_wav_raw\721134858\3316808966.wav	0	0	[1.1242940426, 0.2220441997, 0.3316926062, 0.8417518735, 0.311650902, 1.1146781445]	1.12429	0.222044	0.331693	0.841752	0.311651	1.11468
367	1209	jd	cy_697201828_2791309556.wav	D:\hc--document\all text\P8_medical\thesis_dataset\use_wav_raw\697201828\2791309556.wav	0	2	[0.188411817, 1.9069430828, 1.749627471, 0.092663236, 0.2626950741, 0.4666393399]	0.188412	1.90694	1.74963	0.0926632	0.262695	0.466639
368	782	jd	cy_424151914_1023163422.wav	D:\hc--document\all text\P8_medical\thesis_dataset\use_wav_raw\424151914\1023163422.wav	0	2	[0.2479195148, 1.7608184814, 1.7644087076, 0.1059709564, 0.2469446659, 0.3484765887]	0.24792	1.76082	1.76441	0.105971	0.246945	0.348477
369	193	fn	dx_90027146_28878183.wav	D:\hc--document\all text\P8_medical\thesis_dataset\use_wav_raw\90027146\28878183.wav	0	1	[0.2962267697, 1.9435840845, 1.6301350594, 0.1580067277, 0.2339131683, 0.5613508821]	0.296227	1.94358	1.63014	0.158007	0.233913	0.561351
370	1302	rouhe	cy_571529426_1645563047.wav	D:\hc--document\all text\P8_medical\thesis_dataset\use_wav_raw\571529426\1645563047.wav	0	4	[0.9541111588, 0.0, 0.3259502351, 1.1180814505, 1.276556015, 0.3719773293]	0.954111	0	0.32595	1.11808	1.27656	0.371977
371	1531	jd	cy_188549662_289243016.wav	D:\hc--document\all text\P8_medical\thesis_dataset\use_wav_raw\188549662\289243016.wav	0	2	[0.477219522, 0.9697009921, 1.3985114098, 0.1541346461, 0.3044750094, 0.1052999273]	0.47722	0.969701	1.39851	0.154135	0.304475	0.1053
372	141	general	dx_45197161_11584285.wav	D:\hc--document\all text\P8_medical\thesis_dataset\use_wav_raw\45197161\11584285.wav	0	0	[1.2143975496, 0.2896167636, 0.3578207195, 0.5676433444, 0.4249624312, 1.1951497793]	1.2144	0.289617	0.357821	0.567643	0.424962	1.19515
373	1380	rouhe	cy_719135963_3270070951.wav	D:\hc--document\all text\P8_medical\thesis_dataset\use_wav_raw\719135963\3270070951.wav	0	4	[1.1552847624, 0.5659894347, 0.3730509281, 0.8009866476, 0.5495567918, 1.3326576948]	1.15528	0.565989	0.373051	0.800987	0.549557	1.33266
374	936	yl	cy_714205001_3155655652.wav	D:\hc--document\all text\P8_medical\thesis_dataset\use_wav_raw\714205001\3155655652.wav	0	5	[1.1552867889, 0.2894470096, 0.3962719142, 0.5581940413, 0.3613602519, 1.1460319757]	1.15529	0.289447	0.396272	0.558194	0.36136	1.14603
375	577	fn	cy_720469683_3301763806.wav	D:\hc--document\all text\P8_medical\thesis_dataset\use_wav_raw\720469683\3301763806.wav	0	1	[0.3035770357, 1.9079395533, 1.6636968851, 0.1200199351, 0.1510530561, 0.4859069586]	0.303577	1.90794	1.6637	0.12002	0.151053	0.485907
376	1198	rouhe	cy_724591884_3396653205.wav	D:\hc--document\all text\P8_medical\thesis_dataset\use_wav_raw\724591884\3396653205.wav	0	4	[0.9001155496, 0.0455145165, 0.2663330734, 1.2741609812, 1.1829276085, 0.356120497]	0.900116	0.0455145	0.266333	1.27416	1.18293	0.35612
377	1332	fn	cy_663262541_2133246854.wav	D:\hc--document\all text\P8_medical\thesis_dataset\use_wav_raw\663262541\2133246854.wav	0	1	[0.4239765704, 1.6864351034, 1.4611496925, 0.1753011197, 0.318615675, 0.4915263355]	0.423977	1.68644	1.46115	0.175301	0.318616	0.491526
378	1296	general	cy_720622083_3304966763.wav	D:\hc--document\all text\P8_medical\thesis_dataset\use_wav_raw\720622083\3304966763.wav	0	0	[1.1091359854, 0.140884608, 0.4935236275, 0.2976941168, 0.6154904366, 0.9091032743]	1.10914	0.140885	0.493524	0.297694	0.61549	0.909103
379	1016	general	cy_667408124_2155473284.wav	D:\hc--document\all text\P8_medical\thesis_dataset\use_wav_raw\667408124\2155473284.wav	0	0	[1.20411098, 0.4019525349, 0.180989325, 0.8268016577, 0.4024944305, 1.4117367268]	1.20411	0.401953	0.180989	0.826802	0.402494	1.41174
380	432	wz	cy_672234727_2254880404.wav	D:\hc--document\all text\P8_medical\thesis_dataset\use_wav_raw\672234727\2254880404.wav	0	3	[1.0781002045, 0.0073200557, 0.1897724718, 1.292432785, 0.569288373, 0.9010512233]	1.0781	0.00732006	0.189772	1.29243	0.569288	0.901051
381	1435	yl	cy_689308895_2622446078.wav	D:\hc--document\all text\P8_medical\thesis_dataset\use_wav_raw\689308895\2622446078.wav	0	5	[1.1425136328, 0.6940094233, 0.2826555669, 0.8051203489, 0.4203800857, 1.5668126345]	1.14251	0.694009	0.282656	0.80512	0.42038	1.56681
382	1682	fn	cy_698880986_2827251412.wav	D:\hc--document\all text\P8_medical\thesis_dataset\use_wav_raw\698880986\2827251412.wav	0	1	[0.4795145988, 1.4160475731, 1.5067088604, 0.1339777708, 0.3447621167, 0.1726574004]	0.479515	1.41605	1.50671	0.133978	0.344762	0.172657
383	515	jd	cy_438966580_1078522692.wav	D:\hc--document\all text\P8_medical\thesis_dataset\use_wav_raw\438966580\1078522692.wav	0	2	[0.5339305997, 1.3716512918, 1.5441168547, 0.026706988, 0.3962133825, 0.0]	0.533931	1.37165	1.54412	0.026707	0.396213	0
384	1229	general	cy_714789523_3169675879.wav	D:\hc--document\all text\P8_medical\thesis_dataset\use_wav_raw\714789523\3169675879.wav	0	0	[1.1460498571, 0.0748899058, 0.1436332464, 1.0971187353, 0.4904225171, 1.1355104446]	1.14605	0.0748899	0.143633	1.09712	0.490423	1.13551
385	474	wz	dx_61510427_16794525.wav	D:\hc--document\all text\P8_medical\thesis_dataset\use_wav_raw\61510427\16794525.wav	0	3	[1.0634490252, 0.1211252287, 0.3917357326, 1.1575756073, 1.1204906702, 0.3017070591]	1.06345	0.121125	0.391736	1.15758	1.12049	0.301707
386	1764	general	cy_677768140_2371884476.wav	D:\hc--document\all text\P8_medical\thesis_dataset\use_wav_raw\677768140\2371884476.wav	0	0	[1.0943033695, 0.0949535966, 0.2929538488, 0.9875116348, 1.4319250584, 0.1855726093]	1.0943	0.0949536	0.292954	0.987512	1.43193	0.185573
387	1515	yl	cy_671725915_2245972432.wav	D:\hc--document\all text\P8_medical\thesis_dataset\use_wav_raw\671725915\2245972432.wav	0	5	[0.1929248124, 2.0665550232, 1.7378606796, 0.0941380039, 0.2158724964, 0.542199254]	0.192925	2.06656	1.73786	0.094138	0.215872	0.542199
388	931	fn	cy_669308120_2194114230.wav	D:\hc--document\all text\P8_medical\thesis_dataset\use_wav_raw\669308120\2194114230.wav	0	1	[0.1479578316, 2.0180606842, 1.7541955709, 0.0904200673, 0.1762735397, 0.5189688206]	0.147958	2.01806	1.7542	0.0904201	0.176274	0.518969
389	1017	yl	cy_723049489_3360860389.wav	D:\hc--document\all text\P8_medical\thesis_dataset\use_wav_raw\723049489\3360860389.wav	0	5	[0.558544755, 1.4599615335, 1.333114028, 0.2572214603, 0.3717897236, 0.67596668]	0.558545	1.45996	1.33311	0.257221	0.37179	0.675967
390	1542	fn	cy_714946614_3172636112.wav	D:\hc--document\all text\P8_medical\thesis_dataset\use_wav_raw\714946614\3172636112.wav	0	1	[0.2075500786, 2.0402731895, 1.7530366182, 0.1408517063, 0.1601400822, 0.4647856355]	0.20755	2.04027	1.75304	0.140852	0.16014	0.464786
391	1782	jd	cy_700948680_2872423776.wav	D:\hc--document\all text\P8_medical\thesis_dataset\use_wav_raw\700948680\2872423776.wav	0	2	[0.2703718841, 1.6728174686, 1.8286010027, 0.0121070007, 0.3346582353, 0.211842984]	0.270372	1.67282	1.8286	0.012107	0.334658	0.211843
392	808	wz	cy_671953360_2248928812.wav	D:\hc--document\all text\P8_medical\thesis_dataset\use_wav_raw\671953360\2248928812.wav	0	3	[0.9568234682, 0.0954590216, 0.2253238112, 1.4042197466, 1.1255863905, 0.2825295031]	0.956823	0.095459	0.225324	1.40422	1.12559	0.28253
393	814	yl	cy_694053230_2722897016.wav	D:\hc--document\all text\P8_medical\thesis_dataset\use_wav_raw\694053230\2722897016.wav	0	5	[1.0587059259, 0.1011731997, 0.2331838757, 1.326151371, 1.2331529856, 0.2522279024]	1.05871	0.101173	0.233184	1.32615	1.23315	0.252228
394	1027	rouhe	dx_87462407_25476762.wav	D:\hc--document\all text\P8_medical\thesis_dataset\use_wav_raw\87462407\25476762.wav	0	4	[1.1062250137, 0.0850321725, 0.4355113506, 0.3402418792, 0.5325540304, 0.9442877769]	1.10623	0.0850322	0.435511	0.340242	0.532554	0.944288
395	1349	general	dx_87471159_25524554.wav	D:\hc--document\all text\P8_medical\thesis_dataset\use_wav_raw\87471159\25524554.wav	0	0	[1.1104363203, 0.4689208567, 0.2881251872, 0.9935393929, 0.2795305252, 1.384480238]	1.11044	0.468921	0.288125	0.993539	0.279531	1.38448
396	72	general	cy_629693663_1953141368.wav	D:\hc--document\all text\P8_medical\thesis_dataset\use_wav_raw\629693663\1953141368.wav	0	0	[0.9271205664, 0.105993785, 0.3266695738, 1.4423692226, 0.8431441784, 0.626979053]	0.927121	0.105994	0.32667	1.44237	0.843144	0.626979
397	1694	fn	dx_68499243_19155825.wav	D:\hc--document\all text\P8_medical\thesis_dataset\use_wav_raw\68499243\19155825.wav	0	1	[0.3598907888, 1.7547610998, 1.6656035185, 0.0846449882, 0.2890540957, 0.4300510287]	0.359891	1.75476	1.6656	0.084645	0.289054	0.430051
398	1086	fn	cy_718182843_3248800987.wav	D:\hc--document\all text\P8_medical\thesis_dataset\use_wav_raw\718182843\3248800987.wav	0	1	[0.1421331316, 2.0810761452, 1.7050507069, 0.1115503684, 0.1836589426, 0.5217629671]	0.142133	2.08108	1.70505	0.11155	0.183659	0.521763
399	133	wz	dx_81749576_27261244.wav	D:\hc--document\all text\P8_medical\thesis_dataset\use_wav_raw\81749576\27261244.wav	0	3	[0.9105787277, 0.1508607864, 0.2196824402, 1.3887609243, 1.3093105555, 0.2054417133]	0.910579	0.150861	0.219682	1.38876	1.30931	0.205442
400	533	fn	cy_683364600_2493445576.wav	D:\hc--document\all text\P8_medical\thesis_dataset\use_wav_raw\683364600\2493445576.wav	0	1	[0.3338026404, 1.8313241005, 1.571557641, 0.181931749, 0.2259549797, 0.6752357483]	0.333803	1.83132	1.57156	0.181932	0.225955	0.675236
401	497	wz	dx_88615322_26799927.wav	D:\hc--document\all text\P8_medical\thesis_dataset\use_wav_raw\88615322\26799927.wav	0	3	[0.9224427342, 0.0939422399, 0.2387115657, 1.4826915264, 1.2206449509, 0.3100403249]	0.922443	0.0939422	0.238712	1.48269	1.22064	0.31004
402	541	fn	cy_685383278_2536886892.wav	D:\hc--document\all text\P8_medical\thesis_dataset\use_wav_raw\685383278\2536886892.wav	0	1	[0.1572903395, 1.9716260433, 1.7887761593, 0.0261843633, 0.1664934903, 0.4120946229]	0.15729	1.97163	1.78878	0.0261844	0.166493	0.412095
403	972	jd	cy_723425298_3369053346.wav	D:\hc--document\all text\P8_medical\thesis_dataset\use_wav_raw\723425298\3369053346.wav	0	2	[0.2760978341, 1.8107737303, 1.7163752317, 0.0474045463, 0.227004841, 0.3768757582]	0.276098	1.81077	1.71638	0.0474045	0.227005	0.376876
404	389	wz	dx_70214167_19771450.wav	D:\hc--document\all text\P8_medical\thesis_dataset\use_wav_raw\70214167\19771450.wav	0	3	[1.1929309368, 0.0, 0.4167408645, 0.3302870095, 1.3631072044, 0.2971315384]	1.19293	0	0.416741	0.330287	1.36311	0.297132
405	1098	jd	cy_561428229_1593007709.wav	D:\hc--document\all text\P8_medical\thesis_dataset\use_wav_raw\561428229\1593007709.wav	0	2	[0.5188515782, 0.9308699369, 1.3191959858, 0.1611475796, 0.3737314343, 0.1233440861]	0.518852	0.93087	1.3192	0.161148	0.373731	0.123344
406	658	yl	cy_438149730_1075636098.wav	D:\hc--document\all text\P8_medical\thesis_dataset\use_wav_raw\438149730\1075636098.wav	0	5	[1.2486423254, 0.0, 0.325368613, 0.3219067156, 1.1738008261, 0.4433339536]	1.24864	0	0.325369	0.321907	1.1738	0.443334
407	623	wz	cy_692825905_2697051120.wav	D:\hc--document\all text\P8_medical\thesis_dataset\use_wav_raw\692825905\2697051120.wav	0	3	[1.0006011724, 0.0403354988, 0.2585495114, 1.4550782442, 0.874196589, 0.6542866826]	1.0006	0.0403355	0.25855	1.45508	0.874197	0.654287
408	1469	wz	cy_691547923_2669417430.wav	D:\hc--document\all text\P8_medical\thesis_dataset\use_wav_raw\691547923\2669417430.wav	0	3	[1.0318504572, 0.1537153125, 0.2853899896, 1.4232693911, 1.0356026888, 0.456490308]	1.03185	0.153715	0.28539	1.42327	1.0356	0.45649
409	1182	fn	cy_698742814_2823286980.wav	D:\hc--document\all text\P8_medical\thesis_dataset\use_wav_raw\698742814\2823286980.wav	0	1	[0.2169499248, 2.0340907574, 1.7040213346, 0.093174696, 0.1736157089, 0.5248528719]	0.21695	2.03409	1.70402	0.0931747	0.173616	0.524853
410	1178	rouhe	cy_715799261_3193810741.wav	D:\hc--document\all text\P8_medical\thesis_dataset\use_wav_raw\715799261\3193810741.wav	0	4	[1.1172157526, 0.0209809709, 0.3460994363, 0.96546942, 1.4911934137, 0.1859673411]	1.11722	0.020981	0.346099	0.965469	1.49119	0.185967
411	231	fn	cy_555259120_1563158624.wav	D:\hc--document\all text\P8_medical\thesis_dataset\use_wav_raw\555259120\1563158624.wav	0	1	[0.2798081934, 1.9398391247, 1.7393728495, 0.0728049725, 0.2964339256, 0.226320073]	0.279808	1.93984	1.73937	0.072805	0.296434	0.22632
412	107	general	cy_714873128_3171101252.wav	D:\hc--document\all text\P8_medical\thesis_dataset\use_wav_raw\714873128\3171101252.wav	0	0	[1.1783834696, 0.4619576335, 0.5397081971, 0.4275851548, 0.4745355248, 1.3194344044]	1.17838	0.461958	0.539708	0.427585	0.474536	1.31943
413	1726	general	cy_700580316_2864317380.wav	D:\hc--document\all text\P8_medical\thesis_dataset\use_wav_raw\700580316\2864317380.wav	0	0	[1.1448191404, 0.1354923546, 0.4095475674, 0.3754058778, 1.4380173683, 0.3096636236]	1.14482	0.135492	0.409548	0.375406	1.43802	0.309664
414	158	wz	dx_89180770_31081424.wav	D:\hc--document\all text\P8_medical\thesis_dataset\use_wav_raw\89180770\31081424.wav	0	3	[0.8360737562, 0.0626577362, 0.3198892474, 1.4621415138, 1.0907213688, 0.3887778819]	0.836074	0.0626577	0.319889	1.46214	1.09072	0.388778
415	1128	fn	cy_722201800_3340754140.wav	D:\hc--document\all text\P8_medical\thesis_dataset\use_wav_raw\722201800\3340754140.wav	0	1	[0.1001936719, 1.9691786766, 1.7542959452, 0.0801629424, 0.1205394268, 0.4568296671]	0.100194	1.96918	1.7543	0.0801629	0.120539	0.45683
416	557	wz	cy_677074100_2356906376.wav	D:\hc--document\all text\P8_medical\thesis_dataset\use_wav_raw\677074100\2356906376.wav	0	3	[0.9167678356, 0.0141041595, 0.26026842, 1.2485225201, 0.6407621503, 0.8718075156]	0.916768	0.0141042	0.260268	1.24852	0.640762	0.871808
417	750	fn	dx_64474308_21782530.wav	D:\hc--document\all text\P8_medical\thesis_dataset\use_wav_raw\64474308\21782530.wav	0	1	[0.1747627854, 2.0100934505, 1.6919277906, 0.0944705084, 0.0938107669, 0.5285035968]	0.174763	2.01009	1.69193	0.0944705	0.0938108	0.528504
418	122	jd	dx_85812693_24633123.wav	D:\hc--document\all text\P8_medical\thesis_dataset\use_wav_raw\85812693\24633123.wav	0	2	[0.3327540755, 1.8294341564, 1.651802063, 0.1436667144, 0.2670969367, 0.3847884834]	0.332754	1.82943	1.6518	0.143667	0.267097	0.384788
419	406	fn	dx_92144041_31318588.wav	D:\hc--document\all text\P8_medical\thesis_dataset\use_wav_raw\92144041\31318588.wav	0	1	[0.3204252422, 1.7824628353, 1.6909883022, 0.0883153901, 0.2405843288, 0.3658838868]	0.320425	1.78246	1.69099	0.0883154	0.240584	0.365884
420	1720	yl	cy_559757883_1584862448.wav	D:\hc--document\all text\P8_medical\thesis_dataset\use_wav_raw\559757883\1584862448.wav	0	5	[0.7099537253, 1.1918576956, 1.208130002, 0.1831397414, 0.4133292735, 0.5725151896]	0.709954	1.19186	1.20813	0.18314	0.413329	0.572515
421	615	wz	dx_91021200_30112857.wav	D:\hc--document\all text\P8_medical\thesis_dataset\use_wav_raw\91021200\30112857.wav	0	3	[0.9797807336, 0.0135863451, 0.2326211333, 1.2073427439, 0.7647312284, 0.7881702185]	0.979781	0.0135863	0.232621	1.20734	0.764731	0.78817
422	402	jd	cy_678734314_2392696600.wav	D:\hc--document\all text\P8_medical\thesis_dataset\use_wav_raw\678734314\2392696600.wav	0	2	[0.2693468034, 1.8982201815, 1.7148202658, 0.0964451432, 0.2859731019, 0.350908041]	0.269347	1.89822	1.71482	0.0964451	0.285973	0.350908
423	191	yl	dx_92459732_31781964.wav	D:\hc--document\all text\P8_medical\thesis_dataset\use_wav_raw\92459732\31781964.wav	0	5	[1.2585494518, 0.0663939193, 0.2610249519, 0.5016594529, 0.9255265594, 0.6576344967]	1.25855	0.0663939	0.261025	0.501659	0.925527	0.657634
424	1110	fn	cy_678394344_2385292186.wav	D:\hc--document\all text\P8_medical\thesis_dataset\use_wav_raw\678394344\2385292186.wav	0	1	[1.143564105, 0.0, 0.2306478322, 1.207329154, 0.8061246872, 0.5794366598]	1.14356	0	0.230648	1.20733	0.806125	0.579437
425	1654	yl	cy_720013101_3290399674.wav	D:\hc--document\all text\P8_medical\thesis_dataset\use_wav_raw\720013101\3290399674.wav	0	5	[1.3137050867, 0.0883655995, 0.2011731714, 0.8418511152, 0.9377754927, 0.7484313846]	1.31371	0.0883656	0.201173	0.841851	0.937775	0.748431
426	1050	jd	cy_670623367_2221339414.wav	D:\hc--document\all text\P8_medical\thesis_dataset\use_wav_raw\670623367\2221339414.wav	0	2	[1.0417505503, 0.194707498, 0.5302710533, 0.345361799, 0.6165395379, 0.9343311787]	1.04175	0.194707	0.530271	0.345362	0.61654	0.934331
427	1290	wz	dx_88270974_26621419.wav	D:\hc--document\all text\P8_medical\thesis_dataset\use_wav_raw\88270974\26621419.wav	0	3	[0.8014765978, 0.1178520024, 0.3194503188, 1.4926080704, 1.0752091408, 0.4419605136]	0.801477	0.117852	0.31945	1.49261	1.07521	0.441961
428	858	yl	cy_702647882_2910167582.wav	D:\hc--document\all text\P8_medical\thesis_dataset\use_wav_raw\702647882\2910167582.wav	0	5	[1.1127582788, 0.451821804, 0.3922206163, 0.6890717745, 0.3110269308, 1.500138998]	1.11276	0.451822	0.392221	0.689072	0.311027	1.50014
429	312	jd	cy_672222620_2254657778.wav	D:\hc--document\all text\P8_medical\thesis_dataset\use_wav_raw\672222620\2254657778.wav	0	2	[0.3606704175, 1.537409544, 1.6257981062, 0.1122947931, 0.1903085858, 0.3586951494]	0.36067	1.53741	1.6258	0.112295	0.190309	0.358695
430	195	jd	cy_723054910_3361190968.wav	D:\hc--document\all text\P8_medical\thesis_dataset\use_wav_raw\723054910\3361190968.wav	0	2	[1.0110279322, 0.252938807, 0.5118134618, 0.4681192338, 0.4007096291, 1.0667762756]	1.01103	0.252939	0.511813	0.468119	0.40071	1.06678
431	142	general	cy_625269188_1929031364.wav	D:\hc--document\all text\P8_medical\thesis_dataset\use_wav_raw\625269188\1929031364.wav	0	0	[1.2381227016, 0.0627610758, 0.3575281203, 0.2250144929, 1.3480241299, 0.3408058286]	1.23812	0.0627611	0.357528	0.225014	1.34802	0.340806
432	488	rouhe	cy_719846647_3286941480.wav	D:\hc--document\all text\P8_medical\thesis_dataset\use_wav_raw\719846647\3286941480.wav	0	4	[1.2357486486, 0.02511096, 0.3911191225, 0.3245316744, 1.367952466, 0.5128515363]	1.23575	0.025111	0.391119	0.324532	1.36795	0.512852
433	923	general	cy_673926093_2290554084.wav	D:\hc--document\all text\P8_medical\thesis_dataset\use_wav_raw\673926093\2290554084.wav	0	0	[1.0955122709, 0.1775071472, 0.5374620557, 0.2604126334, 1.2792528868, 0.135186702]	1.09551	0.177507	0.537462	0.260413	1.27925	0.135187
434	862	rouhe	cy_719797188_3285731005.wav	D:\hc--document\all text\P8_medical\thesis_dataset\use_wav_raw\719797188\3285731005.wav	0	4	[1.1945041418, 0.0535243675, 0.3751458824, 0.2437869459, 1.361604929, 0.4555767477]	1.1945	0.0535244	0.375146	0.243787	1.3616	0.455577
435	368	rouhe	cy_718032193_3244530276.wav	D:\hc--document\all text\P8_medical\thesis_dataset\use_wav_raw\718032193\3244530276.wav	0	4	[1.2411338091, 0.2042968124, 0.2378034741, 1.1369453669, 1.244605422, 0.5806782246]	1.24113	0.204297	0.237803	1.13695	1.24461	0.580678
436	1649	general	dx_91819631_30944991.wav	D:\hc--document\all text\P8_medical\thesis_dataset\use_wav_raw\91819631\30944991.wav	0	0	[1.0786095858, 0.023918068, 0.5267741084, 0.3062932193, 1.2482434511, 0.1580511034]	1.07861	0.0239181	0.526774	0.306293	1.24824	0.158051
437	1161	yl	dx_84229532_26857288.wav	D:\hc--document\all text\P8_medical\thesis_dataset\use_wav_raw\84229532\26857288.wav	0	5	[1.0423291922, 0.7914228439, 0.5980382562, 0.665448904, 0.5239970684, 1.6959280968]	1.04233	0.791423	0.598038	0.665449	0.523997	1.69593
438	869	fn	cy_724798577_3402674157.wav	D:\hc--document\all text\P8_medical\thesis_dataset\use_wav_raw\724798577\3402674157.wav	0	1	[0.2965801954, 1.9105967283, 1.7281032801, 0.1100217253, 0.2146175653, 0.3635233045]	0.29658	1.9106	1.7281	0.110022	0.214618	0.363523
439	469	jd	cy_677755447_2371607080.wav	D:\hc--document\all text\P8_medical\thesis_dataset\use_wav_raw\677755447\2371607080.wav	0	2	[0.7736954689, 1.1198540926, 1.1574274302, 0.2315467149, 0.4410269856, 0.7925145626]	0.773695	1.11985	1.15743	0.231547	0.441027	0.792515
440	1496	yl	cy_672419030_2258703140.wav	D:\hc--document\all text\P8_medical\thesis_dataset\use_wav_raw\672419030\2258703140.wav	0	5	[0.4037349522, 1.3539477587, 1.5727151632, 0.1411281377, 0.2784192264, 0.197102353]	0.403735	1.35395	1.57272	0.141128	0.278419	0.197102
441	949	general	dx_87623149_25775178.wav	D:\hc--document\all text\P8_medical\thesis_dataset\use_wav_raw\87623149\25775178.wav	0	0	[1.3264558315, 0.0125138098, 0.3034292161, 0.3577569127, 1.0555198193, 0.4886163175]	1.32646	0.0125138	0.303429	0.357757	1.05552	0.488616
442	1578	wz	dx_88603610_28221818.wav	D:\hc--document\all text\P8_medical\thesis_dataset\use_wav_raw\88603610\28221818.wav	0	3	[0.9030047655, 0.0388720781, 0.2246078402, 1.4858506918, 1.1050752401, 0.3353366554]	0.903005	0.0388721	0.224608	1.48585	1.10508	0.335337
443	263	rouhe	cy_575669614_1668292991.wav	D:\hc--document\all text\P8_medical\thesis_dataset\use_wav_raw\575669614\1668292991.wav	0	4	[0.8764876723, 0.0138355698, 0.1740045995, 1.5210548639, 1.1182198524, 0.3181423545]	0.876488	0.0138356	0.174005	1.52105	1.11822	0.318142
444	1228	fn	cy_258777311_474529520.wav	D:\hc--document\all text\P8_medical\thesis_dataset\use_wav_raw\258777311\474529520.wav	0	1	[0.3558790088, 1.7362776995, 1.7346657515, 0.0798471868, 0.2646240592, 0.3804529011]	0.355879	1.73628	1.73467	0.0798472	0.264624	0.380453
445	559	wz	cy_721157725_3317692000.wav	D:\hc--document\all text\P8_medical\thesis_dataset\use_wav_raw\721157725\3317692000.wav	0	3	[1.2863959074, 0.034166012, 0.3332121372, 0.249820143, 1.2928315401, 0.3317492604]	1.2864	0.034166	0.333212	0.24982	1.29283	0.331749
446	561	yl	cy_717250992_3226871860.wav	D:\hc--document\all text\P8_medical\thesis_dataset\use_wav_raw\717250992\3226871860.wav	0	5	[1.0241655111, 0.9546759129, 0.5072728395, 0.7232047915, 0.5489153266, 1.6560095549]	1.02417	0.954676	0.507273	0.723205	0.548915	1.65601
447	1049	yl	cy_702174644_2899447888.wav	D:\hc--document\all text\P8_medical\thesis_dataset\use_wav_raw\702174644\2899447888.wav	0	5	[0.9645411372, 0.1071410701, 0.2320860326, 1.4580955505, 1.3274674416, 0.2997434139]	0.964541	0.107141	0.232086	1.4581	1.32747	0.299743
448	621	general	cy_641067300_2014546712.wav	D:\hc--document\all text\P8_medical\thesis_dataset\use_wav_raw\641067300\2014546712.wav	0	0	[1.3281776905, 0.2346708775, 0.1524813026, 0.8565759659, 0.3977497816, 1.2531069517]	1.32818	0.234671	0.152481	0.856576	0.39775	1.25311
449	1419	wz	cy_612597256_1861403837.wav	D:\hc--document\all text\P8_medical\thesis_dataset\use_wav_raw\612597256\1861403837.wav	0	3	[1.0869641304, 0.0309325848, 0.2243478596, 1.1302118301, 0.5024885535, 0.9744869471]	1.08696	0.0309326	0.224348	1.13021	0.502489	0.974487
450	1339	wz	cy_694978166_2743786094.wav	D:\hc--document\all text\P8_medical\thesis_dataset\use_wav_raw\694978166\2743786094.wav	0	3	[0.8676554561, 0.0475179181, 0.3158606887, 1.4458017349, 1.2714295387, 0.3214225769]	0.867655	0.0475179	0.315861	1.4458	1.27143	0.321423
451	689	rouhe	cy_715046853_3175740763.wav	D:\hc--document\all text\P8_medical\thesis_dataset\use_wav_raw\715046853\3175740763.wav	0	4	[1.1873323917, 0.0630813166, 0.4188481867, 0.2507200837, 1.3987981081, 0.3265762329]	1.18733	0.0630813	0.418848	0.25072	1.3988	0.326576
452	1510	general	dx_88326354_26912253.wav	D:\hc--document\all text\P8_medical\thesis_dataset\use_wav_raw\88326354\26912253.wav	0	0	[0.9346796274, 0.0649404526, 0.3239790499, 1.4544366598, 1.0985513926, 0.4239975214]	0.93468	0.0649405	0.323979	1.45444	1.09855	0.423998
453	446	yl	dx_87931873_26305601.wav	D:\hc--document\all text\P8_medical\thesis_dataset\use_wav_raw\87931873\26305601.wav	0	5	[0.8907142282, 0.6415633559, 0.7709324956, 0.196093753, 0.2661392093, 1.1166152954]	0.890714	0.641563	0.770932	0.196094	0.266139	1.11662
454	926	jd	cy_161283898_221401121.wav	D:\hc--document\all text\P8_medical\thesis_dataset\use_wav_raw\161283898\221401121.wav	0	2	[0.2188953757, 1.9056003094, 1.7331163883, 0.0931538045, 0.2067384422, 0.4311802089]	0.218895	1.9056	1.73312	0.0931538	0.206738	0.43118
455	1498	general	cy_722442973_3346176316.wav	D:\hc--document\all text\P8_medical\thesis_dataset\use_wav_raw\722442973\3346176316.wav	0	0	[1.2584671974, 0.1622953415, 0.261150986, 0.8261038661, 0.3797379434, 1.1379081011]	1.25847	0.162295	0.261151	0.826104	0.379738	1.13791
456	643	general	cy_721833574_3331989252.wav	D:\hc--document\all text\P8_medical\thesis_dataset\use_wav_raw\721833574\3331989252.wav	0	0	[1.2022855282, 0.1947148293, 0.5044807792, 0.1637353003, 1.3606737852, 0.0517595634]	1.20229	0.194715	0.504481	0.163735	1.36067	0.0517596
457	1467	yl	dx_90009004_28770353.wav	D:\hc--document\all text\P8_medical\thesis_dataset\use_wav_raw\90009004\28770353.wav	0	5	[0.223236382, 1.8545180559, 1.6907726526, 0.0516882762, 0.1600456238, 0.4810011387]	0.223236	1.85452	1.69077	0.0516883	0.160046	0.481001
458	747	rouhe	cy_702299656_2902213078.wav	D:\hc--document\all text\P8_medical\thesis_dataset\use_wav_raw\702299656\2902213078.wav	0	4	[1.1587506533, 0.0837886631, 0.431756258, 0.23066926, 1.5827099085, 0.2152895033]	1.15875	0.0837887	0.431756	0.230669	1.58271	0.21529
459	118	fn	dx_54603175_14637621.wav	D:\hc--document\all text\P8_medical\thesis_dataset\use_wav_raw\54603175\14637621.wav	0	1	[0.4699349403, 1.7125602961, 1.6297613382, 0.0998655781, 0.3861806393, 0.2945021689]	0.469935	1.71256	1.62976	0.0998656	0.386181	0.294502
460	583	wz	dx_91692066_31612669.wav	D:\hc--document\all text\P8_medical\thesis_dataset\use_wav_raw\91692066\31612669.wav	0	3	[0.9092056751, 0.0967533439, 0.2042798847, 1.4710263014, 0.9663794637, 0.4473674595]	0.909206	0.0967533	0.20428	1.47103	0.966379	0.447367
461	1135	fn	cy_693940721_2720581210.wav	D:\hc--document\all text\P8_medical\thesis_dataset\use_wav_raw\693940721\2720581210.wav	0	1	[0.263019979, 1.7826410532, 1.6461213827, 0.1108274907, 0.3528625071, 0.5789949894]	0.26302	1.78264	1.64612	0.110827	0.352863	0.578995
462	336	fn	cy_697319524_2791594376.wav	D:\hc--document\all text\P8_medical\thesis_dataset\use_wav_raw\697319524\2791594376.wav	0	1	[1.0651500225, 0.2316088676, 0.311794281, 1.1738770008, 1.2327711582, 0.4576702714]	1.06515	0.231609	0.311794	1.17388	1.23277	0.45767
463	976	fn	cy_681618970_2455880088.wav	D:\hc--document\all text\P8_medical\thesis_dataset\use_wav_raw\681618970\2455880088.wav	0	1	[0.2952642441, 1.903644681, 1.6394563913, 0.0962879583, 0.3547797799, 0.2668998837]	0.295264	1.90364	1.63946	0.096288	0.35478	0.2669
464	437	fn	dx_57308252_15412238.wav	D:\hc--document\all text\P8_medical\thesis_dataset\use_wav_raw\57308252\15412238.wav	0	1	[0.6569555402, 1.3855373859, 1.2081333399, 0.1842794865, 0.3137823939, 0.9776480794]	0.656956	1.38554	1.20813	0.184279	0.313782	0.977648
465	1670	jd	cy_427758802_1036894287.wav	D:\hc--document\all text\P8_medical\thesis_dataset\use_wav_raw\427758802\1036894287.wav	0	2	[0.2941345572, 1.5508105755, 1.6755681038, 0.0970003307, 0.1868945658, 0.3553205729]	0.294135	1.55081	1.67557	0.0970003	0.186895	0.355321
466	1432	general	dx_80885085_23009830.wav	D:\hc--document\all text\P8_medical\thesis_dataset\use_wav_raw\80885085\23009830.wav	0	0	[0.2660521567, 1.9309158325, 1.6496062279, 0.1360773295, 0.2289821804, 0.4575978518]	0.266052	1.93092	1.64961	0.136077	0.228982	0.457598
467	832	rouhe	cy_697281080_2790711922.wav	D:\hc--document\all text\P8_medical\thesis_dataset\use_wav_raw\697281080\2790711922.wav	0	4	[1.1026326418, 0.0452879667, 0.1698334068, 1.2400431633, 0.7717741132, 0.754760325]	1.10263	0.045288	0.169833	1.24004	0.771774	0.75476
468	1272	wz	dx_92591256_32221505.wav	D:\hc--document\all text\P8_medical\thesis_dataset\use_wav_raw\92591256\32221505.wav	0	3	[0.8865791559, 0.0585580468, 0.2780444324, 1.4020301104, 1.0724073648, 0.449842155]	0.886579	0.058558	0.278044	1.40203	1.07241	0.449842
469	1243	rouhe	dx_51975234_13732317.wav	D:\hc--document\all text\P8_medical\thesis_dataset\use_wav_raw\51975234\13732317.wav	0	4	[1.113319397, 0.051254414, 0.4525150955, 0.5088861585, 1.0764670372, 0.4771149755]	1.11332	0.0512544	0.452515	0.508886	1.07647	0.477115
470	879	rouhe	cy_703871008_2938156948.wav	D:\hc--document\all text\P8_medical\thesis_dataset\use_wav_raw\703871008\2938156948.wav	0	4	[0.8475427032, 0.4675710201, 0.8445175886, 0.1384732127, 1.0597326756, 0.3085356951]	0.847543	0.467571	0.844518	0.138473	1.05973	0.308536
471	94	fn	cy_711062235_3093800096.wav	D:\hc--document\all text\P8_medical\thesis_dataset\use_wav_raw\711062235\3093800096.wav	0	1	[0.1619770825, 2.0259845257, 1.7269933224, 0.1211193576, 0.1655880213, 0.5176656246]	0.161977	2.02598	1.72699	0.121119	0.165588	0.517666
472	1058	rouhe	cy_557466818_1573826138.wav	D:\hc--document\all text\P8_medical\thesis_dataset\use_wav_raw\557466818\1573826138.wav	0	4	[1.1691030264, 0.0, 0.4574699104, 0.2155621797, 1.4535889626, 0.2228509486]	1.1691	0	0.45747	0.215562	1.45359	0.222851
473	1431	fn	cy_711918824_3110173254.wav	D:\hc--document\all text\P8_medical\thesis_dataset\use_wav_raw\711918824\3110173254.wav	0	1	[0.2720323503, 1.8401825428, 1.6380742788, 0.1078903675, 0.1273056716, 0.565874815]	0.272032	1.84018	1.63807	0.10789	0.127306	0.565875
474	1340	general	dx_60103611_16361689.wav	D:\hc--document\all text\P8_medical\thesis_dataset\use_wav_raw\60103611\16361689.wav	0	0	[1.0648021698, 0.3662836254, 0.6055725813, 0.3024218976, 0.2910413444, 1.1196733713]	1.0648	0.366284	0.605573	0.302422	0.291041	1.11967
475	1169	general	cy_673558854_2282797124.wav	D:\hc--document\all text\P8_medical\thesis_dataset\use_wav_raw\673558854\2282797124.wav	0	0	[0.889234364, 0.3208044767, 0.8653126359, 0.1298259497, 0.873239696, 0.2310890257]	0.889234	0.320804	0.865313	0.129826	0.87324	0.231089
476	673	wz	dx_87091031_26594751.wav	D:\hc--document\all text\P8_medical\thesis_dataset\use_wav_raw\87091031\26594751.wav	0	3	[0.9777162075, 0.0601800606, 0.1634090245, 1.5124746561, 1.0499908924, 0.2217032611]	0.977716	0.0601801	0.163409	1.51247	1.04999	0.221703
477	186	wz	cy_681379855_2451183722.wav	D:\hc--document\all text\P8_medical\thesis_dataset\use_wav_raw\681379855\2451183722.wav	0	3	[1.1869632006, 0.0942947492, 0.2336826026, 1.0319951773, 1.2265400887, 0.5272779465]	1.18696	0.0942947	0.233683	1.032	1.22654	0.527278
478	578	rouhe	cy_668525699_2178194982.wav	D:\hc--document\all text\P8_medical\thesis_dataset\use_wav_raw\668525699\2178194982.wav	0	4	[0.9717648029, 0.0063973698, 0.1950022429, 1.5237050056, 0.6713258028, 0.6676359177]	0.971765	0.00639737	0.195002	1.52371	0.671326	0.667636
479	790	general	cy_620980612_1906662947.wav	D:\hc--document\all text\P8_medical\thesis_dataset\use_wav_raw\620980612\1906662947.wav	0	0	[0.5820551515, 0.7161130905, 1.2477011681, 0.208769381, 0.5281435847, 0.0]	0.582055	0.716113	1.2477	0.208769	0.528144	0
480	1704	yl	cy_722561282_3348321895.wav	D:\hc--document\all text\P8_medical\thesis_dataset\use_wav_raw\722561282\3348321895.wav	0	5	[0.3592550755, 1.7845878601, 1.6698790789, 0.1202789098, 0.2866916955, 0.5210452676]	0.359255	1.78459	1.66988	0.120279	0.286692	0.521045
481	1502	general	cy_713370592_3138075982.wav	D:\hc--document\all text\P8_medical\thesis_dataset\use_wav_raw\713370592\3138075982.wav	0	0	[1.1164827347, 0.0927258953, 0.2406919748, 1.2419660091, 0.5627936125, 0.7987323403]	1.11648	0.0927259	0.240692	1.24197	0.562794	0.798732
482	1778	general	cy_723718426_3376984230.wav	D:\hc--document\all text\P8_medical\thesis_dataset\use_wav_raw\723718426\3376984230.wav	0	0	[1.332103014, 0.1363647878, 0.1541448683, 0.9364350438, 0.6997947097, 0.9433792233]	1.3321	0.136365	0.154145	0.936435	0.699795	0.943379
483	1117	wz	cy_716140312_3201552872.wav	D:\hc--document\all text\P8_medical\thesis_dataset\use_wav_raw\716140312\3201552872.wav	0	3	[0.9618508816, 0.061618641, 0.4336237013, 1.0835756063, 1.5624349117, 0.1850402504]	0.961851	0.0616186	0.433624	1.08358	1.56243	0.18504
484	710	rouhe	cy_694951414_2742900676.wav	D:\hc--document\all text\P8_medical\thesis_dataset\use_wav_raw\694951414\2742900676.wav	0	4	[1.0733453035, 0.0, 0.3903558254, 0.9959703684, 1.3192815781, 0.3182066083]	1.07335	0	0.390356	0.99597	1.31928	0.318207
485	1538	general	cy_658952207_2109717215.wav	D:\hc--document\all text\P8_medical\thesis_dataset\use_wav_raw\658952207\2109717215.wav	0	0	[1.1466811895, 0.5447804928, 0.4361404777, 0.5849923491, 0.2505899668, 1.3833707571]	1.14668	0.54478	0.43614	0.584992	0.25059	1.38337
486	433	rouhe	cy_664445294_2140204709.wav	D:\hc--document\all text\P8_medical\thesis_dataset\use_wav_raw\664445294\2140204709.wav	0	4	[1.0611082315, 0.0489919856, 0.2192379981, 1.2588721514, 0.692071259, 0.9523078799]	1.06111	0.048992	0.219238	1.25887	0.692071	0.952308
487	687	general	cy_712843823_3127041353.wav	D:\hc--document\all text\P8_medical\thesis_dataset\use_wav_raw\712843823\3127041353.wav	0	0	[1.1684200764, 0.0214121398, 0.4361811876, 0.4619636238, 0.5577499866, 0.8286833167]	1.16842	0.0214121	0.436181	0.461964	0.55775	0.828683
488	781	fn	dx_90602000_29423833.wav	D:\hc--document\all text\P8_medical\thesis_dataset\use_wav_raw\90602000\29423833.wav	0	1	[0.4141828418, 1.7960218191, 1.530777216, 0.144301787, 0.2251059711, 0.6114596725]	0.414183	1.79602	1.53078	0.144302	0.225106	0.61146
489	150	fn	cy_683375197_2493677844.wav	D:\hc--document\all text\P8_medical\thesis_dataset\use_wav_raw\683375197\2493677844.wav	0	1	[0.2002137601, 2.0027821064, 1.6686652899, 0.0927501395, 0.2079156935, 0.4550821185]	0.200214	2.00278	1.66867	0.0927501	0.207916	0.455082
490	1104	general	cy_712334712_3117925773.wav	D:\hc--document\all text\P8_medical\thesis_dataset\use_wav_raw\712334712\3117925773.wav	0	0	[1.1513223648, 0.2037675679, 0.4001939595, 0.4147883654, 1.3321944475, 0.4047440886]	1.15132	0.203768	0.400194	0.414788	1.33219	0.404744
491	653	fn	dx_90596331_29397074.wav	D:\hc--document\all text\P8_medical\thesis_dataset\use_wav_raw\90596331\29397074.wav	0	1	[0.1599533707, 2.0714371204, 1.7021871805, 0.1050280333, 0.0775431544, 0.5460484624]	0.159953	2.07144	1.70219	0.105028	0.0775432	0.546048
492	1587	general	cy_723993629_3382229646.wav	D:\hc--document\all text\P8_medical\thesis_dataset\use_wav_raw\723993629\3382229646.wav	0	0	[0.9537733793, 0.3541024923, 0.7301502228, 0.2625921965, 0.5420253873, 0.5632432699]	0.953773	0.354102	0.73015	0.262592	0.542025	0.563243
493	339	general	cy_708675896_3047243266.wav	D:\hc--document\all text\P8_medical\thesis_dataset\use_wav_raw\708675896\3047243266.wav	0	0	[0.1721059531, 2.0208098888, 1.7297251225, 0.1013885587, 0.3034544885, 0.4559632838]	0.172106	2.02081	1.72973	0.101389	0.303454	0.455963
494	1056	rouhe	cy_720687336_3307063592.wav	D:\hc--document\all text\P8_medical\thesis_dataset\use_wav_raw\720687336\3307063592.wav	0	4	[1.1700268984, 0.0940073282, 0.3774469197, 0.3390838206, 1.4355763197, 0.3588682413]	1.17003	0.0940073	0.377447	0.339084	1.43558	0.358868
495	837	fn	cy_594386602_1767800210.wav	D:\hc--document\all text\P8_medical\thesis_dataset\use_wav_raw\594386602\1767800210.wav	0	1	[0.2845292389, 1.9386531115, 1.6159616709, 0.1510502398, 0.3758194745, 0.4175811708]	0.284529	1.93865	1.61596	0.15105	0.375819	0.417581
496	1387	fn	dx_92322944_31694243.wav	D:\hc--document\all text\P8_medical\thesis_dataset\use_wav_raw\92322944\31694243.wav	0	1	[0.2514027059, 1.851000309, 1.6700688601, 0.1383433789, 0.156201303, 0.6794401407]	0.251403	1.851	1.67007	0.138343	0.156201	0.67944
497	1545	rouhe	cy_723691707_3375245014.wav	D:\hc--document\all text\P8_medical\thesis_dataset\use_wav_raw\723691707\3375245014.wav	0	4	[1.2724606991, 0.0, 0.3530624211, 0.2574889362, 1.4358460903, 0.2793496847]	1.27246	0	0.353062	0.257489	1.43585	0.27935
498	216	rouhe	cy_708611974_3044512760.wav	D:\hc--document\all text\P8_medical\thesis_dataset\use_wav_raw\708611974\3044512760.wav	0	4	[1.1171866655, 0.0875775069, 0.4014444947, 1.0489293337, 1.5262150764, 0.1039815843]	1.11719	0.0875775	0.401444	1.04893	1.52622	0.103982
499	434	fn	cy_644032736_2029460588.wav	D:\hc--document\all text\P8_medical\thesis_dataset\use_wav_raw\644032736\2029460588.wav	0	1	[0.5216941833, 1.4336473942, 1.5281919241, 0.0673746839, 0.4124215245, 0.0554638803]	0.521694	1.43365	1.52819	0.0673747	0.412422	0.0554639
500	1314	general	cy_686980309_2571607788.wav	D:\hc--document\all text\P8_medical\thesis_dataset\use_wav_raw\686980309\2571607788.wav	0	0	[1.1950743198, 0.3503829837, 0.5495999455, 0.4115170836, 0.5949298143, 1.1239614487]	1.19507	0.350383	0.5496	0.411517	0.59493	1.12396
501	476	wz	dx_84438061_24123545.wav	D:\hc--document\all text\P8_medical\thesis_dataset\use_wav_raw\84438061\24123545.wav	0	3	[1.1220428944, 0.1032565534, 0.3513176441, 0.6626521945, 1.3442128897, 0.3376446664]	1.12204	0.103257	0.351318	0.662652	1.34421	0.337645
502	816	rouhe	cy_720349178_3299380190.wav	D:\hc--document\all text\P8_medical\thesis_dataset\use_wav_raw\720349178\3299380190.wav	0	4	[1.1446447372, 0.0266480725, 0.3961063027, 0.3851927221, 1.5909770727, 0.151146844]	1.14464	0.0266481	0.396106	0.385193	1.59098	0.151147
503	138	fn	dx_89804477_28332090.wav	D:\hc--document\all text\P8_medical\thesis_dataset\use_wav_raw\89804477\28332090.wav	0	1	[0.2615053952, 1.7722688913, 1.7091599703, 0.0624345355, 0.2753077447, 0.3297941983]	0.261505	1.77227	1.70916	0.0624345	0.275308	0.329794
504	918	general	cy_717808607_3239988649.wav	D:\hc--document\all text\P8_medical\thesis_dataset\use_wav_raw\717808607\3239988649.wav	0	0	[0.9072524309, 0.4688099623, 0.8435699344, 0.1726602465, 1.1278409958, 0.0789077356]	0.907252	0.46881	0.84357	0.17266	1.12784	0.0789077
505	1672	general	dx_85700608_24597553.wav	D:\hc--document\all text\P8_medical\thesis_dataset\use_wav_raw\85700608\24597553.wav	0	0	[1.1052968502, 0.2136249989, 0.233003661, 0.9648215175, 0.2755460143, 1.2260832787]	1.1053	0.213625	0.233004	0.964822	0.275546	1.22608
506	1124	yl	dx_89468403_32026851.wav	D:\hc--document\all text\P8_medical\thesis_dataset\use_wav_raw\89468403\32026851.wav	0	5	[1.0149055719, 0.4173919559, 0.4123217762, 0.5571201444, 0.260453105, 1.3621170521]	1.01491	0.417392	0.412322	0.55712	0.260453	1.36212
507	1401	yl	cy_718169095_3250011396.wav	D:\hc--document\all text\P8_medical\thesis_dataset\use_wav_raw\718169095\3250011396.wav	0	5	[0.2161276788, 2.1174781322, 1.661616087, 0.0614701249, 0.2202120125, 0.4577367604]	0.216128	2.11748	1.66162	0.0614701	0.220212	0.457737
508	1635	jd	dx_77288236_21887610.wav	D:\hc--document\all text\P8_medical\thesis_dataset\use_wav_raw\77288236\21887610.wav	0	2	[0.8809444904, 0.0739098415, 0.2444063723, 1.3864121437, 1.2088651657, 0.3327259123]	0.880944	0.0739098	0.244406	1.38641	1.20887	0.332726
509	93	fn	cy_437144255_1072512441.wav	D:\hc--document\all text\P8_medical\thesis_dataset\use_wav_raw\437144255\1072512441.wav	0	1	[0.3872337639, 1.8429225683, 1.5419973135, 0.0846584216, 0.2794384956, 0.5431925654]	0.387234	1.84292	1.542	0.0846584	0.279438	0.543193
510	922	rouhe	cy_670469502_2218229146.wav	D:\hc--document\all text\P8_medical\thesis_dataset\use_wav_raw\670469502\2218229146.wav	0	4	[0.3369619846, 1.5689371824, 1.6695283651, 0.103797771, 0.3800955117, 0.1984885037]	0.336962	1.56894	1.66953	0.103798	0.380096	0.198489
511	1614	general	cy_673645164_2284678056.wav	D:\hc--document\all text\P8_medical\thesis_dataset\use_wav_raw\673645164\2284678056.wav	0	0	[1.0701526403, 0.1029612124, 0.2456334084, 1.0933462381, 0.496343255, 1.047624588]	1.07015	0.102961	0.245633	1.09335	0.496343	1.04762
512	701	wz	cy_724704215_3400362768.wav	D:\hc--document\all text\P8_medical\thesis_dataset\use_wav_raw\724704215\3400362768.wav	0	3	[1.123190403, 0.3810113072, 0.3897950053, 0.4524024129, 0.3834908307, 1.1707006693]	1.12319	0.381011	0.389795	0.452402	0.383491	1.1707
513	1037	wz	dx_91272395_30221517.wav	D:\hc--document\all text\P8_medical\thesis_dataset\use_wav_raw\91272395\30221517.wav	0	3	[0.8566796184, 0.0739300102, 0.277051121, 1.5016958714, 1.2163587809, 0.3029826581]	0.85668	0.07393	0.277051	1.5017	1.21636	0.302983
514	403	rouhe	cy_691147819_2661123322.wav	D:\hc--document\all text\P8_medical\thesis_dataset\use_wav_raw\691147819\2661123322.wav	0	4	[1.3450098038, 0.1534464657, 0.2564547658, 0.8352625966, 1.42433846, 0.5012401938]	1.34501	0.153446	0.256455	0.835263	1.42434	0.50124
515	1741	yl	cy_692412837_2689000072.wav	D:\hc--document\all text\P8_medical\thesis_dataset\use_wav_raw\692412837\2689000072.wav	0	5	[1.1779351234, 0.1525675356, 0.4399283826, 0.2565169036, 1.4870740175, 0.2761974335]	1.17794	0.152568	0.439928	0.256517	1.48707	0.276197
516	66	general	dx_87009613_26185393.wav	D:\hc--document\all text\P8_medical\thesis_dataset\use_wav_raw\87009613\26185393.wav	0	0	[0.9689005613, 0.4030873179, 0.7666245699, 0.2230990231, 0.45281896, 0.5522361398]	0.968901	0.403087	0.766625	0.223099	0.452819	0.552236
517	1257	yl	cy_698817170_2824904334.wav	D:\hc--document\all text\P8_medical\thesis_dataset\use_wav_raw\698817170\2824904334.wav	0	5	[0.5413302779, 1.4496736526, 1.2815624475, 0.2615779042, 0.3228583336, 0.9985231757]	0.54133	1.44967	1.28156	0.261578	0.322858	0.998523
518	549	wz	dx_84096642_28304707.wav	D:\hc--document\all text\P8_medical\thesis_dataset\use_wav_raw\84096642\28304707.wav	0	3	[1.0996239185, 0.0817875117, 0.4491299391, 0.5540495515, 0.6936414838, 0.863291204]	1.09962	0.0817875	0.44913	0.55405	0.693641	0.863291
519	707	yl	cy_688115999_2596486872.wav	D:\hc--document\all text\P8_medical\thesis_dataset\use_wav_raw\688115999\2596486872.wav	0	5	[1.1026134491, 0.301115334, 0.2056395859, 0.7897263169, 0.1802568138, 1.4479548931]	1.10261	0.301115	0.20564	0.789726	0.180257	1.44795
520	1558	wz	cy_721130997_3316597479.wav	D:\hc--document\all text\P8_medical\thesis_dataset\use_wav_raw\721130997\3316597479.wav	0	3	[0.9626223445, 0.1077287942, 0.2477440238, 1.4488893747, 0.6354658604, 0.6509555578]	0.962622	0.107729	0.247744	1.44889	0.635466	0.650956
521	313	general	dx_74841249_21160893.wav	D:\hc--document\all text\P8_medical\thesis_dataset\use_wav_raw\74841249\21160893.wav	0	0	[1.2542082071, 0.0612048432, 0.2211653888, 0.7636504173, 0.4883948565, 0.9879972339]	1.25421	0.0612048	0.221165	0.76365	0.488395	0.987997
522	820	wz	cy_714569759_3164363862.wav	D:\hc--document\all text\P8_medical\thesis_dataset\use_wav_raw\714569759\3164363862.wav	0	3	[1.0144212246, 0.0, 0.1980552077, 1.422695756, 0.6470944881, 0.6618139148]	1.01442	0	0.198055	1.4227	0.647094	0.661814
523	485	general	dx_67363411_18898986.wav	D:\hc--document\all text\P8_medical\thesis_dataset\use_wav_raw\67363411\18898986.wav	0	0	[1.0335335732, 0.4545506537, 0.4589195848, 0.658370316, 0.4943431318, 1.3027075529]	1.03353	0.454551	0.45892	0.65837	0.494343	1.30271
524	1335	rouhe	cy_684293417_2514144166.wav	D:\hc--document\all text\P8_medical\thesis_dataset\use_wav_raw\684293417\2514144166.wav	0	4	[1.0295737982, 0.0, 0.3468925655, 1.1397168636, 1.2792785168, 0.4238462746]	1.02957	0	0.346893	1.13972	1.27928	0.423846
525	602	jd	cy_714351931_3159616114.wav	D:\hc--document\all text\P8_medical\thesis_dataset\use_wav_raw\714351931\3159616114.wav	0	2	[0.5512993336, 1.1034595966, 1.4598293304, 0.111491777, 0.406347096, 0.0482445657]	0.551299	1.10346	1.45983	0.111492	0.406347	0.0482446
526	456	general	cy_649090805_2055733121.wav	D:\hc--document\all text\P8_medical\thesis_dataset\use_wav_raw\649090805\2055733121.wav	0	0	[1.0275300741, 0.1481945217, 0.6570520401, 0.1070065424, 1.1610283852, 0.0497086421]	1.02753	0.148195	0.657052	0.107007	1.16103	0.0497086
527	399	fn	dx_57284218_15377196.wav	D:\hc--document\all text\P8_medical\thesis_dataset\use_wav_raw\57284218\15377196.wav	0	1	[0.4023722708, 1.7351397276, 1.6141375303, 0.1320387125, 0.2554096878, 0.3591911793]	0.402372	1.73514	1.61414	0.132039	0.25541	0.359191
528	1555	fn	dx_65539775_18088892.wav	D:\hc--document\all text\P8_medical\thesis_dataset\use_wav_raw\65539775\18088892.wav	0	1	[0.2252926379, 1.9491622448, 1.7218180895, 0.1650613397, 0.254558444, 0.5178266764]	0.225293	1.94916	1.72182	0.165061	0.254558	0.517827
529	638	wz	dx_88034437_26466204.wav	D:\hc--document\all text\P8_medical\thesis_dataset\use_wav_raw\88034437\26466204.wav	0	3	[1.0463024378, 0.0629867837, 0.3231256008, 1.2406511307, 1.2620735168, 0.348159641]	1.0463	0.0629868	0.323126	1.24065	1.26207	0.34816
530	1115	rouhe	cy_694218380_2726436170.wav	D:\hc--document\all text\P8_medical\thesis_dataset\use_wav_raw\694218380\2726436170.wav	0	4	[0.9532648921, 0.0672343001, 0.1771582514, 1.4780254364, 1.2283474207, 0.3663036525]	0.953265	0.0672343	0.177158	1.47803	1.22835	0.366304
531	1398	fn	dx_91051151_30260942.wav	D:\hc--document\all text\P8_medical\thesis_dataset\use_wav_raw\91051151\30260942.wav	0	1	[0.2842812836, 1.795290947, 1.7671933174, 0.0351775214, 0.149465695, 0.4461503923]	0.284281	1.79529	1.76719	0.0351775	0.149466	0.44615
532	302	rouhe	cy_719264689_3273408895.wav	D:\hc--document\all text\P8_medical\thesis_dataset\use_wav_raw\719264689\3273408895.wav	0	4	[0.9778176546, 0.0, 0.2522885501, 1.2219988108, 0.8009186983, 0.6350355148]	0.977818	0	0.252289	1.222	0.800919	0.635036
533	1071	rouhe	cy_719270691_3273869539.wav	D:\hc--document\all text\P8_medical\thesis_dataset\use_wav_raw\719270691\3273869539.wav	0	4	[0.9918445945, 0.1057938039, 0.1329307854, 1.487005949, 1.285230875, 0.26181072]	0.991845	0.105794	0.132931	1.48701	1.28523	0.261811
534	1367	general	cy_652903645_2077988546.wav	D:\hc--document\all text\P8_medical\thesis_dataset\use_wav_raw\652903645\2077988546.wav	0	0	[1.0446498394, 0.2791951597, 0.5299875736, 0.3849788904, 0.3652267754, 0.902605176]	1.04465	0.279195	0.529988	0.384979	0.365227	0.902605
535	1360	yl	dx_88171332_28137015.wav	D:\hc--document\all text\P8_medical\thesis_dataset\use_wav_raw\88171332\28137015.wav	0	5	[1.0013959408, 0.0324199833, 0.2957457602, 1.1091637611, 1.2906999588, 0.2578284144]	1.0014	0.03242	0.295746	1.10916	1.2907	0.257828
536	1055	general	cy_654900062_2087056355.wav	D:\hc--document\all text\P8_medical\thesis_dataset\use_wav_raw\654900062\2087056355.wav	0	0	[0.9787604213, 0.272239536, 0.6948153973, 0.2034657747, 1.202049017, 0.1441207975]	0.97876	0.27224	0.694815	0.203466	1.20205	0.144121
537	1274	yl	cy_719224909_3272036049.wav	D:\hc--document\all text\P8_medical\thesis_dataset\use_wav_raw\719224909\3272036049.wav	0	5	[1.1471846104, 0.537183702, 0.4070593119, 0.5920458436, 0.3300121129, 1.5541172028]	1.14718	0.537184	0.407059	0.592046	0.330012	1.55412
538	648	general	cy_707785098_3028049798.wav	D:\hc--document\all text\P8_medical\thesis_dataset\use_wav_raw\707785098\3028049798.wav	0	0	[1.2673181295, 0.0613311529, 0.3014565706, 0.3533307612, 1.4844273329, 0.3330444098]	1.26732	0.0613312	0.301457	0.353331	1.48443	0.333044
539	413	jd	dx_84826716_24277023.wav	D:\hc--document\all text\P8_medical\thesis_dataset\use_wav_raw\84826716\24277023.wav	0	2	[0.3255987465, 1.777072072, 1.7230263948, 0.1049527675, 0.3361117244, 0.2477853298]	0.325599	1.77707	1.72303	0.104953	0.336112	0.247785
540	1212	general	cy_723619456_3375042432.wav	D:\hc--document\all text\P8_medical\thesis_dataset\use_wav_raw\723619456\3375042432.wav	0	0	[1.1437122822, 0.1662246585, 0.5076642036, 0.2380902916, 0.3829987943, 0.9902071953]	1.14371	0.166225	0.507664	0.23809	0.382999	0.990207
541	1575	rouhe	dx_91085255_30452049.wav	D:\hc--document\all text\P8_medical\thesis_dataset\use_wav_raw\91085255\30452049.wav	0	4	[1.163091898, 0.01916904, 0.4222871363, 0.2752742171, 1.2905790806, 0.3833121061]	1.16309	0.019169	0.422287	0.275274	1.29058	0.383312
542	1366	jd	dx_84199007_26686546.wav	D:\hc--document\all text\P8_medical\thesis_dataset\use_wav_raw\84199007\26686546.wav	0	2	[0.9563317299, 0.1214149147, 0.254899472, 1.4532635212, 0.8448842764, 0.5923041105]	0.956332	0.121415	0.254899	1.45326	0.844884	0.592304
543	1381	yl	dx_91375969_30393836.wav	D:\hc--document\all text\P8_medical\thesis_dataset\use_wav_raw\91375969\30393836.wav	0	5	[0.9654306769, 0.8360061646, 0.6406701207, 0.553037405, 0.4759515524, 1.5138276815]	0.965431	0.836006	0.64067	0.553037	0.475952	1.51383
544	1686	yl	dx_90652993_29696865.wav	D:\hc--document\all text\P8_medical\thesis_dataset\use_wav_raw\90652993\29696865.wav	0	5	[0.9904037118, 0.7008402944, 0.5000334382, 0.5904064775, 0.0952020586, 1.6408048868]	0.990404	0.70084	0.500033	0.590406	0.0952021	1.6408
545	975	yl	cy_702264986_2901666914.wav	D:\hc--document\all text\P8_medical\thesis_dataset\use_wav_raw\702264986\2901666914.wav	0	5	[1.0823374987, 0.7116644382, 0.4175380468, 0.6748384237, 0.162412107, 1.6442853212]	1.08234	0.711664	0.417538	0.674838	0.162412	1.64429
546	964	fn	cy_717475752_3232280516.wav	D:\hc--document\all text\P8_medical\thesis_dataset\use_wav_raw\717475752\3232280516.wav	0	1	[0.1430901289, 1.9961589575, 1.7725499868, 0.0914867222, 0.2820703685, 0.4582829773]	0.14309	1.99616	1.77255	0.0914867	0.28207	0.458283
547	1061	general	dx_50052183_13088139.wav	D:\hc--document\all text\P8_medical\thesis_dataset\use_wav_raw\50052183\13088139.wav	0	0	[0.896407187, 0.4056212306, 0.8462443352, 0.2226520181, 0.6655676365, 0.4741160572]	0.896407	0.405621	0.846244	0.222652	0.665568	0.474116
548	1158	yl	cy_709115402_3057087240.wav	D:\hc--document\all text\P8_medical\thesis_dataset\use_wav_raw\709115402\3057087240.wav	0	5	[1.0821839571, 0.7152427435, 0.5389163494, 0.5103793144, 0.5760893226, 1.4320063591]	1.08218	0.715243	0.538916	0.510379	0.576089	1.43201
549	1405	yl	dx_91281651_30253082.wav	D:\hc--document\all text\P8_medical\thesis_dataset\use_wav_raw\91281651\30253082.wav	0	5	[0.9777520895, 0.9109169245, 0.7438861728, 0.4247359335, 0.3198121488, 1.5398416519]	0.977752	0.910917	0.743886	0.424736	0.319812	1.53984
550	256	yl	cy_680462270_2430956710.wav	D:\hc--document\all text\P8_medical\thesis_dataset\use_wav_raw\680462270\2430956710.wav	0	5	[1.1888654232, 0.2861452997, 0.4548949897, 0.3924562931, 0.5708718896, 1.1319470406]	1.18887	0.286145	0.454895	0.392456	0.570872	1.13195
551	257	fn	cy_691232556_2662827672.wav	D:\hc--document\all text\P8_medical\thesis_dataset\use_wav_raw\691232556\2662827672.wav	0	1	[0.9862739444, 0.0536734387, 0.2643640041, 1.2588545084, 1.3813186884, 0.2294793129]	0.986274	0.0536734	0.264364	1.25885	1.38132	0.229479
552	341	yl	cy_719288462_3273220750.wav	D:\hc--document\all text\P8_medical\thesis_dataset\use_wav_raw\719288462\3273220750.wav	0	5	[1.1850407124, 0.5137988925, 0.3083298802, 0.7088869214, 0.3679156899, 1.4240398407]	1.18504	0.513799	0.30833	0.708887	0.367916	1.42404
553	1594	wz	cy_674139190_2296073742.wav	D:\hc--document\all text\P8_medical\thesis_dataset\use_wav_raw\674139190\2296073742.wav	0	3	[0.8770925999, 0.0737045184, 0.1911944151, 1.4820822477, 1.0153129101, 0.3823878467]	0.877093	0.0737045	0.191194	1.48208	1.01531	0.382388
554	585	wz	cy_701084692_2875464378.wav	D:\hc--document\all text\P8_medical\thesis_dataset\use_wav_raw\701084692\2875464378.wav	0	3	[1.1940664053, 0.0, 0.2804835439, 0.8968834877, 1.0077028275, 0.4941923022]	1.19407	0	0.280484	0.896883	1.0077	0.494192
555	101	general	cy_591081511_1750922651.wav	D:\hc--document\all text\P8_medical\thesis_dataset\use_wav_raw\591081511\1750922651.wav	0	0	[1.2121835947, 0.4041898847, 0.5199328661, 0.4655426741, 0.6017888188, 1.1041637659]	1.21218	0.40419	0.519933	0.465543	0.601789	1.10416
556	1000	jd	dx_89994595_28686824.wav	D:\hc--document\all text\P8_medical\thesis_dataset\use_wav_raw\89994595\28686824.wav	0	2	[0.2329905033, 1.8485741615, 1.6404650211, 0.080059655, 0.1701979488, 0.4562686384]	0.232991	1.84857	1.64047	0.0800597	0.170198	0.456269
557	159	wz	dx_91574478_30975886.wav	D:\hc--document\all text\P8_medical\thesis_dataset\use_wav_raw\91574478\30975886.wav	0	3	[0.9844601154, 0.051714845, 0.3832475543, 1.2203457355, 1.4031044245, 0.1916346103]	0.98446	0.0517148	0.383248	1.22035	1.4031	0.191635
558	1093	rouhe	cy_722872132_3356796339.wav	D:\hc--document\all text\P8_medical\thesis_dataset\use_wav_raw\722872132\3356796339.wav	0	4	[0.8476287723, 0.7848954797, 0.910811007, 0.2735735178, 0.3762623072, 0.8259093761]	0.847629	0.784895	0.910811	0.273574	0.376262	0.825909
559	1453	rouhe	cy_724618580_3398832006.wav	D:\hc--document\all text\P8_medical\thesis_dataset\use_wav_raw\724618580\3398832006.wav	0	4	[0.3455851078, 1.7845013142, 1.5801092386, 0.1225117445, 0.2635802925, 0.429792881]	0.345585	1.7845	1.58011	0.122512	0.26358	0.429793
560	590	general	cy_440807732_1084971126.wav	D:\hc--document\all text\P8_medical\thesis_dataset\use_wav_raw\440807732\1084971126.wav	0	0	[0.9450774193, 0.0793191493, 0.3004933298, 1.4093465805, 0.7286165953, 0.7368909717]	0.945077	0.0793191	0.300493	1.40935	0.728617	0.736891
561	362	yl	dx_77346450_21866947.wav	D:\hc--document\all text\P8_medical\thesis_dataset\use_wav_raw\77346450\21866947.wav	0	5	[0.9059898853, 0.6647139788, 0.7211719751, 0.3172301948, 0.4823380709, 1.0588867664]	0.90599	0.664714	0.721172	0.31723	0.482338	1.05889
562	520	wz	cy_719371623_3274705603.wav	D:\hc--document\all text\P8_medical\thesis_dataset\use_wav_raw\719371623\3274705603.wav	0	3	[1.1061830521, 0.0, 0.15506576, 1.2604587078, 0.5647141933, 0.8095815182]	1.10618	0	0.155066	1.26046	0.564714	0.809582
563	136	yl	cy_667657143_2163455644.wav	D:\hc--document\all text\P8_medical\thesis_dataset\use_wav_raw\667657143\2163455644.wav	0	5	[0.4628348053, 1.7942186594, 1.4853540659, 0.1668649316, 0.2544480264, 0.4275712967]	0.462835	1.79422	1.48535	0.166865	0.254448	0.427571
564	850	general	cy_704569798_2954507896.wav	D:\hc--document\all text\P8_medical\thesis_dataset\use_wav_raw\704569798\2954507896.wav	0	0	[1.0223608017, 0.2744949162, 0.5454661846, 0.3537996113, 0.3593661785, 1.0342253447]	1.02236	0.274495	0.545466	0.3538	0.359366	1.03423
565	630	yl	dx_92383345_32027433.wav	D:\hc--document\all text\P8_medical\thesis_dataset\use_wav_raw\92383345\32027433.wav	0	5	[1.2461266518, 0.4921290874, 0.4318089485, 0.5818163753, 0.5938990712, 1.3460372686]	1.24613	0.492129	0.431809	0.581816	0.593899	1.34604
566	859	rouhe	cy_665071172_2143215503.wav	D:\hc--document\all text\P8_medical\thesis_dataset\use_wav_raw\665071172\2143215503.wav	0	4	[0.9924128056, 0.7499354482, 0.8383988738, 0.3159659803, 0.7989903092, 1.0895758867]	0.992413	0.749935	0.838399	0.315966	0.79899	1.08958
567	1173	rouhe	cy_719445597_3277649892.wav	D:\hc--document\all text\P8_medical\thesis_dataset\use_wav_raw\719445597\3277649892.wav	0	4	[1.1619381905, 0.1132885888, 0.394146353, 0.2217380404, 1.3050655127, 0.3412400782]	1.16194	0.113289	0.394146	0.221738	1.30507	0.34124
568	1223	jd	dx_57983592_15621523.wav	D:\hc--document\all text\P8_medical\thesis_dataset\use_wav_raw\57983592\15621523.wav	0	2	[0.9128469229, 0.6167445183, 0.7993004322, 0.2722849548, 0.3793965578, 0.9220185876]	0.912847	0.616745	0.7993	0.272285	0.379397	0.922019
569	526	fn	cy_716237932_3204159308.wav	D:\hc--document\all text\P8_medical\thesis_dataset\use_wav_raw\716237932\3204159308.wav	0	1	[1.1126995087, 0.3336044848, 0.4802031517, 0.3353997171, 0.5613280535, 0.9048016667]	1.1127	0.333604	0.480203	0.3354	0.561328	0.904802
570	513	general	cy_722921780_3356817364.wav	D:\hc--document\all text\P8_medical\thesis_dataset\use_wav_raw\722921780\3356817364.wav	0	0	[0.9292017221, 0.4634434879, 0.7015721798, 0.330822587, 0.3270404041, 0.9708912373]	0.929202	0.463443	0.701572	0.330823	0.32704	0.970891
571	1271	yl	cy_667609247_2159620364.wav	D:\hc--document\all text\P8_medical\thesis_dataset\use_wav_raw\667609247\2159620364.wav	0	5	[0.9829078317, 0.7091246247, 0.7687526941, 0.3998863995, 0.5180469751, 1.1751577854]	0.982908	0.709125	0.768753	0.399886	0.518047	1.17516
572	1080	rouhe	cy_709923870_3071556145.wav	D:\hc--document\all text\P8_medical\thesis_dataset\use_wav_raw\709923870\3071556145.wav	0	4	[0.9831283689, 0.1060344428, 0.2964263558, 1.1612619162, 1.4189832211, 0.2891061604]	0.983128	0.106034	0.296426	1.16126	1.41898	0.289106
573	962	wz	cy_671079700_2231027278.wav	D:\hc--document\all text\P8_medical\thesis_dataset\use_wav_raw\671079700\2231027278.wav	0	3	[0.1930179596, 1.9854719639, 1.6907556057, 0.1008473784, 0.2335206866, 0.4831413627]	0.193018	1.98547	1.69076	0.100847	0.233521	0.483141
574	1451	fn	cy_724434254_3393976859.wav	D:\hc--document\all text\P8_medical\thesis_dataset\use_wav_raw\724434254\3393976859.wav	0	1	[0.2280158103, 2.0282206535, 1.7104266882, 0.0752001032, 0.1732571125, 0.4772217274]	0.228016	2.02822	1.71043	0.0752001	0.173257	0.477222
575	1748	general	cy_699622312_2843066098.wav	D:\hc--document\all text\P8_medical\thesis_dataset\use_wav_raw\699622312\2843066098.wav	0	0	[0.526289463, 1.023725152, 1.4205104113, 0.1956750304, 0.3482505977, 0.1256672591]	0.526289	1.02373	1.42051	0.195675	0.348251	0.125667
576	1036	rouhe	cy_674802457_2309299894.wav	D:\hc--document\all text\P8_medical\thesis_dataset\use_wav_raw\674802457\2309299894.wav	0	4	[1.1321606636, 0.0028458934, 0.317784667, 1.148955822, 1.2783336639, 0.3715035617]	1.13216	0.00284589	0.317785	1.14896	1.27833	0.371504
577	268	rouhe	cy_259034107_475332071.wav	D:\hc--document\all text\P8_medical\thesis_dataset\use_wav_raw\259034107\475332071.wav	0	4	[0.1809256673, 1.8938007355, 1.7659914494, 0.1087979749, 0.3551448286, 0.4183606803]	0.180926	1.8938	1.76599	0.108798	0.355145	0.418361
578	436	jd	dx_89444539_31914772.wav	D:\hc--document\all text\P8_medical\thesis_dataset\use_wav_raw\89444539\31914772.wav	0	2	[0.360262692, 1.7013343573, 1.7918564081, 0.1175862923, 0.4542715549, 0.2612220943]	0.360263	1.70133	1.79186	0.117586	0.454272	0.261222
579	1443	fn	cy_717951063_3243327346.wav	D:\hc--document\all text\P8_medical\thesis_dataset\use_wav_raw\717951063\3243327346.wav	0	1	[0.2755807638, 1.7636096478, 1.6768065691, 0.0730920434, 0.1795529127, 0.551148057]	0.275581	1.76361	1.67681	0.073092	0.179553	0.551148
580	977	general	dx_91267340_30179287.wav	D:\hc--document\all text\P8_medical\thesis_dataset\use_wav_raw\91267340\30179287.wav	0	0	[1.1096925735, 0.1902031749, 0.4865810275, 0.3311914504, 0.8795925379, 0.668972671]	1.10969	0.190203	0.486581	0.331191	0.879593	0.668973
581	957	general	cy_694686489_2736047948.wav	D:\hc--document\all text\P8_medical\thesis_dataset\use_wav_raw\694686489\2736047948.wav	0	0	[1.1072005033, 0.1431501508, 0.385936439, 0.4392916262, 1.0589066744, 0.563944459]	1.1072	0.14315	0.385936	0.439292	1.05891	0.563944
582	1259	general	cy_716683601_3213571316.wav	D:\hc--document\all text\P8_medical\thesis_dataset\use_wav_raw\716683601\3213571316.wav	0	0	[1.2204884291, 0.1057950705, 0.3954196572, 0.3135726452, 1.0061753988, 0.6228461266]	1.22049	0.105795	0.39542	0.313573	1.00618	0.622846
583	1130	general	cy_717107800_3223540094.wav	D:\hc--document\all text\P8_medical\thesis_dataset\use_wav_raw\717107800\3223540094.wav	0	0	[1.0599108934, 0.2745750546, 0.5577699542, 0.2817312777, 0.3760173619, 0.9646889567]	1.05991	0.274575	0.55777	0.281731	0.376017	0.964689
584	860	wz	cy_673971877_2291588306.wav	D:\hc--document\all text\P8_medical\thesis_dataset\use_wav_raw\673971877\2291588306.wav	0	3	[1.1553544998, 0.1720623374, 0.1929830164, 1.2834593058, 0.4146932065, 1.0760604143]	1.15535	0.172062	0.192983	1.28346	0.414693	1.07606
585	1637	rouhe	cy_693180154_2704895748.wav	D:\hc--document\all text\P8_medical\thesis_dataset\use_wav_raw\693180154\2704895748.wav	0	4	[1.1523798704, 0.0, 0.4263596237, 0.2514116168, 1.5422548056, 0.3589458168]	1.15238	0	0.42636	0.251412	1.54225	0.358946
586	656	rouhe	cy_690134465_2642603700.wav	D:\hc--document\all text\P8_medical\thesis_dataset\use_wav_raw\690134465\2642603700.wav	0	4	[1.2096760273, 0.032750655, 0.4020568728, 0.1073009446, 1.2143796682, 0.2181735933]	1.20968	0.0327507	0.402057	0.107301	1.21438	0.218174
587	455	yl	cy_692251835_2684712458.wav	D:\hc--document\all text\P8_medical\thesis_dataset\use_wav_raw\692251835\2684712458.wav	0	5	[1.2481336594, 0.2131599039, 0.2312915027, 0.8038460016, 0.4447869956, 1.2578517199]	1.24813	0.21316	0.231292	0.803846	0.444787	1.25785
588	1600	general	cy_724808198_3402004282.wav	D:\hc--document\all text\P8_medical\thesis_dataset\use_wav_raw\724808198\3402004282.wav	0	0	[1.1084702015, 0.0897113606, 0.5043283701, 0.2725816071, 0.6017113924, 0.6152229905]	1.10847	0.0897114	0.504328	0.272582	0.601711	0.615223
589	574	fn	dx_64265787_17710967.wav	D:\hc--document\all text\P8_medical\thesis_dataset\use_wav_raw\64265787\17710967.wav	0	1	[0.2484166026, 2.0025012493, 1.7034676075, 0.1353599578, 0.150428459, 0.5641763806]	0.248417	2.0025	1.70347	0.13536	0.150428	0.564176
590	248	jd	cy_429536356_1043886528.wav	D:\hc--document\all text\P8_medical\thesis_dataset\use_wav_raw\429536356\1043886528.wav	0	2	[1.0730754137, 0.328922987, 0.5039590001, 0.3409394622, 0.2848937511, 0.9788271785]	1.07308	0.328923	0.503959	0.340939	0.284894	0.978827
591	345	general	cy_692615702_2692578074.wav	D:\hc--document\all text\P8_medical\thesis_dataset\use_wav_raw\692615702\2692578074.wav	0	0	[1.162375927, 0.0475982204, 0.3675552309, 0.4230049551, 0.8009748459, 0.6325179338]	1.16238	0.0475982	0.367555	0.423005	0.800975	0.632518
592	1412	wz	cy_682995157_2485508226.wav	D:\hc--document\all text\P8_medical\thesis_dataset\use_wav_raw\682995157\2485508226.wav	0	3	[1.022926569, 0.0412300006, 0.1377490312, 1.3758111, 0.4397818446, 0.8736357689]	1.02293	0.04123	0.137749	1.37581	0.439782	0.873636
593	378	general	cy_714078166_3153300474.wav	D:\hc--document\all text\P8_medical\thesis_dataset\use_wav_raw\714078166\3153300474.wav	0	0	[1.1395915747, 0.029678436, 0.1740143597, 1.1308926344, 0.2918196619, 1.1356780529]	1.13959	0.0296784	0.174014	1.13089	0.29182	1.13568
594	954	wz	cy_663093559_2132397641.wav	D:\hc--document\all text\P8_medical\thesis_dataset\use_wav_raw\663093559\2132397641.wav	0	3	[0.9175966382, 0.0679750144, 0.1964965463, 1.5773224831, 0.9633148909, 0.3654091358]	0.917597	0.067975	0.196497	1.57732	0.963315	0.365409
595	480	jd	cy_669944496_2208936506.wav	D:\hc--document\all text\P8_medical\thesis_dataset\use_wav_raw\669944496\2208936506.wav	0	2	[0.3980680406, 1.6785444021, 1.672913909, 0.1617611945, 0.4481721818, 0.3029325306]	0.398068	1.67854	1.67291	0.161761	0.448172	0.302933
596	317	yl	cy_723169703_3363035252.wav	D:\hc--document\all text\P8_medical\thesis_dataset\use_wav_raw\723169703\3363035252.wav	0	5	[1.2165452242, 0.1080323458, 0.354074955, 0.53311342, 0.6437597871, 0.8276078701]	1.21655	0.108032	0.354075	0.533113	0.64376	0.827608
597	331	wz	cy_672292892_2256065042.wav	D:\hc--document\all text\P8_medical\thesis_dataset\use_wav_raw\672292892\2256065042.wav	0	3	[0.960296452, 0.1716603786, 0.1242305636, 1.2823061943, 0.2424715608, 1.1267580986]	0.960296	0.17166	0.124231	1.28231	0.242472	1.12676
598	91	general	cy_723822757_3379655855.wav	D:\hc--document\all text\P8_medical\thesis_dataset\use_wav_raw\723822757\3379655855.wav	0	0	[1.3099555969, 0.1573020518, 0.2753305137, 0.6614575982, 1.2797167301, 0.5497680306]	1.30996	0.157302	0.275331	0.661458	1.27972	0.549768
599	145	jd	cy_562776_2442795.wav	D:\hc--document\all text\P8_medical\thesis_dataset\use_wav_raw\562776\2442795.wav	0	2	[0.2482012659, 1.950107336, 1.685600996, 0.1451442242, 0.3228031397, 0.3500132263]	0.248201	1.95011	1.6856	0.145144	0.322803	0.350013
600	224	rouhe	cy_716689762_3213957667.wav	D:\hc--document\all text\P8_medical\thesis_dataset\use_wav_raw\716689762\3213957667.wav	0	4	[1.0216277838, 0.0405755565, 0.2753203809, 1.3175195456, 1.3772873878, 0.196664989]	1.02163	0.0405756	0.27532	1.31752	1.37729	0.196665
601	1343	yl	cy_671365901_2236749254.wav	D:\hc--document\all text\P8_medical\thesis_dataset\use_wav_raw\671365901\2236749254.wav	0	5	[1.2265864611, 0.3489486873, 0.219491303, 0.8164232969, 0.4856970608, 1.3682427406]	1.22659	0.348949	0.219491	0.816423	0.485697	1.36824
602	1279	general	cy_621218560_1908069626.wav	D:\hc--document\all text\P8_medical\thesis_dataset\use_wav_raw\621218560\1908069626.wav	0	0	[1.185644865, 0.2136616856, 0.3759858906, 0.5346785188, 0.5204823017, 1.0003913641]	1.18564	0.213662	0.375986	0.534679	0.520482	1.00039
603	1276	yl	cy_563677296_1604504135.wav	D:\hc--document\all text\P8_medical\thesis_dataset\use_wav_raw\563677296\1604504135.wav	0	5	[0.5975620151, 1.3359321356, 1.1910743713, 0.324811548, 0.5061171055, 1.1034802198]	0.597562	1.33593	1.19107	0.324812	0.506117	1.10348
604	483	jd	cy_690127912_2640439348.wav	D:\hc--document\all text\P8_medical\thesis_dataset\use_wav_raw\690127912\2640439348.wav	0	2	[0.8616611362, 0.7034519315, 1.0157161951, 0.2602262199, 0.3243894279, 0.3397623301]	0.861661	0.703452	1.01572	0.260226	0.324389	0.339762
605	911	yl	cy_433282063_1058130228.wav	D:\hc--document\all text\P8_medical\thesis_dataset\use_wav_raw\433282063\1058130228.wav	0	5	[1.0632861853, 0.2107041925, 0.4669550359, 0.5267263651, 0.4450743198, 1.0496344566]	1.06329	0.210704	0.466955	0.526726	0.445074	1.04963
606	1078	rouhe	cy_721164470_3318118177.wav	D:\hc--document\all text\P8_medical\thesis_dataset\use_wav_raw\721164470\3318118177.wav	0	4	[1.1957938671, 0.1095860228, 0.3174899817, 0.7402452826, 1.536113739, 0.2358339876]	1.19579	0.109586	0.31749	0.740245	1.53611	0.235834
607	448	jd	dx_90086786_28592547.wav	D:\hc--document\all text\P8_medical\thesis_dataset\use_wav_raw\90086786\28592547.wav	0	2	[0.1821913272, 1.9553303719, 1.764562726, 0.094813101, 0.2243687809, 0.4198759496]	0.182191	1.95533	1.76456	0.0948131	0.224369	0.419876
608	1638	general	cy_627488104_1942019636.wav	D:\hc--document\all text\P8_medical\thesis_dataset\use_wav_raw\627488104\1942019636.wav	0	0	[1.2158480883, 0.5873600841, 0.3420993388, 0.7626670599, 0.6886823773, 1.4415113926]	1.21585	0.58736	0.342099	0.762667	0.688682	1.44151
609	1215	yl	cy_714844647_3170088312.wav	D:\hc--document\all text\P8_medical\thesis_dataset\use_wav_raw\714844647\3170088312.wav	0	5	[1.1576359272, 0.1578654349, 0.1758170724, 1.0642738342, 0.3173626959, 1.178301096]	1.15764	0.157865	0.175817	1.06427	0.317363	1.1783
610	616	jd	cy_197916863_310515803.wav	D:\hc--document\all text\P8_medical\thesis_dataset\use_wav_raw\197916863\310515803.wav	0	2	[0.3688118458, 1.728001833, 1.7542154789, 0.0197942723, 0.2170048058, 0.2721718252]	0.368812	1.728	1.75422	0.0197943	0.217005	0.272172
611	127	wz	dx_91627467_31267197.wav	D:\hc--document\all text\P8_medical\thesis_dataset\use_wav_raw\91627467\31267197.wav	0	3	[0.9460306764, 0.120941326, 0.3239920437, 1.1905311346, 1.3327758312, 0.297260493]	0.946031	0.120941	0.323992	1.19053	1.33278	0.29726
612	1599	yl	dx_90739844_29827553.wav	D:\hc--document\all text\P8_medical\thesis_dataset\use_wav_raw\90739844\29827553.wav	0	5	[1.1172118187, 0.4968398213, 0.2254369557, 0.9410082102, 0.3403421938, 1.5369818211]	1.11721	0.49684	0.225437	0.941008	0.340342	1.53698
613	1219	jd	dx_89260745_27501409.wav	D:\hc--document\all text\P8_medical\thesis_dataset\use_wav_raw\89260745\27501409.wav	0	2	[0.5626580119, 1.4935532808, 1.5528643131, 0.1396767795, 0.3880361617, 0.2345533371]	0.562658	1.49355	1.55286	0.139677	0.388036	0.234553
614	1424	jd	cy_189451011_290527349.wav	D:\hc--document\all text\P8_medical\thesis_dataset\use_wav_raw\189451011\290527349.wav	0	2	[0.3246075809, 1.7401058674, 1.7668344975, 0.0560887791, 0.2867655456, 0.2713274062]	0.324608	1.74011	1.76683	0.0560888	0.286766	0.271327
615	1391	general	cy_719967397_3290604263.wav	D:\hc--document\all text\P8_medical\thesis_dataset\use_wav_raw\719967397\3290604263.wav	0	0	[1.2245512009, 0.2152479887, 0.3670737445, 0.7149229646, 0.7893339396, 1.0357217789]	1.22455	0.215248	0.367074	0.714923	0.789334	1.03572
616	1527	general	cy_662908684_2131277333.wav	D:\hc--document\all text\P8_medical\thesis_dataset\use_wav_raw\662908684\2131277333.wav	0	0	[1.2327085733, 0.1249358132, 0.1731743515, 1.1289108992, 0.5696802139, 0.9781169295]	1.23271	0.124936	0.173174	1.12891	0.56968	0.978117
617	568	yl	dx_59872678_16349297.wav	D:\hc--document\all text\P8_medical\thesis_dataset\use_wav_raw\59872678\16349297.wav	0	5	[0.6455897689, 0.9924090505, 1.1041530371, 0.2197376937, 0.3503171206, 0.8831669688]	0.64559	0.992409	1.10415	0.219738	0.350317	0.883167
618	1454	general	dx_54311761_14416944.wav	D:\hc--document\all text\P8_medical\thesis_dataset\use_wav_raw\54311761\14416944.wav	0	0	[1.221170783, 0.0749989375, 0.4706158638, 0.1962867528, 1.3552874327, 0.2278246135]	1.22117	0.0749989	0.470616	0.196287	1.35529	0.227825
619	481	yl	cy_724225048_3389668695.wav	D:\hc--document\all text\P8_medical\thesis_dataset\use_wav_raw\724225048\3389668695.wav	0	5	[1.0272761583, 0.4888519347, 0.2532461882, 0.840282023, 0.3985488415, 1.3281370401]	1.02728	0.488852	0.253246	0.840282	0.398549	1.32814
620	1639	general	cy_718650655_3259317056.wav	D:\hc--document\all text\P8_medical\thesis_dataset\use_wav_raw\718650655\3259317056.wav	0	0	[0.9126210809, 0.4401331842, 0.853089869, 0.2499573976, 0.587098062, 0.4397156537]	0.912621	0.440133	0.85309	0.249957	0.587098	0.439716
621	1231	fn	dx_86861171_25217422.wav	D:\hc--document\all text\P8_medical\thesis_dataset\use_wav_raw\86861171\25217422.wav	0	1	[1.0603154898, 0.7984698415, 0.6894806027, 0.4692033231, 0.5875028372, 1.3005588055]	1.06032	0.79847	0.689481	0.469203	0.587503	1.30056
622	1183	general	cy_705102180_2967228936.wav	D:\hc--document\all text\P8_medical\thesis_dataset\use_wav_raw\705102180\2967228936.wav	0	0	[1.0589424372, 0.0623812154, 0.3062512279, 0.6836996078, 0.7947719097, 0.7195331454]	1.05894	0.0623812	0.306251	0.6837	0.794772	0.719533
623	462	general	cy_715943872_3196231491.wav	D:\hc--document\all text\P8_medical\thesis_dataset\use_wav_raw\715943872\3196231491.wav	0	0	[1.1970258951, 0.1178508103, 0.3369216025, 0.5448701978, 0.4105815589, 1.1108055115]	1.19703	0.117851	0.336922	0.54487	0.410582	1.11081
624	1695	general	cy_621546779_1909683488.wav	D:\hc--document\all text\P8_medical\thesis_dataset\use_wav_raw\621546779\1909683488.wav	0	0	[1.2402222157, 0.2951100469, 0.351000011, 0.7010868192, 0.756193459, 1.1780141592]	1.24022	0.29511	0.351	0.701087	0.756193	1.17801
625	421	yl	dx_90109458_28724153.wav	D:\hc--document\all text\P8_medical\thesis_dataset\use_wav_raw\90109458\28724153.wav	0	5	[1.1684443951, 0.0763716921, 0.4769560099, 0.185875088, 1.3227401972, 0.3911987245]	1.16844	0.0763717	0.476956	0.185875	1.32274	0.391199
626	194	jd	cy_399308558_929320472.wav	D:\hc--document\all text\P8_medical\thesis_dataset\use_wav_raw\399308558\929320472.wav	0	2	[0.2307793498, 1.9161827564, 1.7380598783, 0.1366402954, 0.2189182937, 0.3624669313]	0.230779	1.91618	1.73806	0.13664	0.218918	0.362467
627	1064	wz	cy_695210444_2747086900.wav	D:\hc--document\all text\P8_medical\thesis_dataset\use_wav_raw\695210444\2747086900.wav	0	3	[1.069914937, 0.0, 0.1961384118, 1.3260580301, 0.6613259912, 0.5682992935]	1.06991	0	0.196138	1.32606	0.661326	0.568299
628	69	fn	cy_428613100_1040201868.wav	D:\hc--document\all text\P8_medical\thesis_dataset\use_wav_raw\428613100\1040201868.wav	0	1	[0.2527909279, 1.9474802017, 1.6793555021, 0.137678802, 0.2231449634, 0.4430340827]	0.252791	1.94748	1.67936	0.137679	0.223145	0.443034
629	1344	yl	cy_722361574_3344458533.wav	D:\hc--document\all text\P8_medical\thesis_dataset\use_wav_raw\722361574\3344458533.wav	0	5	[1.1776636839, 0.3354417384, 0.4487657249, 0.379032284, 0.5909330845, 1.1287062168]	1.17766	0.335442	0.448766	0.379032	0.590933	1.12871
630	1112	yl	dx_74954333_21240449.wav	D:\hc--document\all text\P8_medical\thesis_dataset\use_wav_raw\74954333\21240449.wav	0	5	[0.8656710982, 0.5960454941, 0.7951450348, 0.2608882785, 0.2684744, 1.0189056396]	0.865671	0.596045	0.795145	0.260888	0.268474	1.01891
631	70	wz	cy_709958842_3070965060.wav	D:\hc--document\all text\P8_medical\thesis_dataset\use_wav_raw\709958842\3070965060.wav	0	3	[0.8794021606, 0.0476665795, 0.2284656167, 1.5224782228, 1.060277462, 0.3361516297]	0.879402	0.0476666	0.228466	1.52248	1.06028	0.336152
632	917	rouhe	cy_704113410_2943831866.wav	D:\hc--document\all text\P8_medical\thesis_dataset\use_wav_raw\704113410\2943831866.wav	0	4	[1.1422435045, 0.0928313434, 0.321133554, 1.0630167723, 1.4787042141, 0.2263953984]	1.14224	0.0928313	0.321134	1.06302	1.4787	0.226395
633	1461	general	cy_673212534_2275390680.wav	D:\hc--document\all text\P8_medical\thesis_dataset\use_wav_raw\673212534\2275390680.wav	0	0	[1.1087563038, 0.1046816111, 0.2729893625, 1.0776861906, 0.5008847713, 0.8836653829]	1.10876	0.104682	0.272989	1.07769	0.500885	0.883665
634	1177	fn	dx_92286625_31501207.wav	D:\hc--document\all text\P8_medical\thesis_dataset\use_wav_raw\92286625\31501207.wav	0	1	[0.2342714965, 2.018702507, 1.7483702898, 0.0416257419, 0.1489046961, 0.4364277124]	0.234271	2.0187	1.74837	0.0416257	0.148905	0.436428
635	948	wz	cy_678650907_2390841478.wav	D:\hc--document\all text\P8_medical\thesis_dataset\use_wav_raw\678650907\2390841478.wav	0	3	[1.1452364922, 0.0, 0.4092090428, 0.4849597812, 1.3465582132, 0.1068722829]	1.14524	0	0.409209	0.48496	1.34656	0.106872
636	417	wz	cy_644471693_2031523562.wav	D:\hc--document\all text\P8_medical\thesis_dataset\use_wav_raw\644471693\2031523562.wav	0	3	[0.9219176769, 0.1348825991, 0.2179031819, 1.4940930605, 1.0540872812, 0.433539778]	0.921918	0.134883	0.217903	1.49409	1.05409	0.43354
637	963	jd	cy_664564979_2143063814.wav	D:\hc--document\all text\P8_medical\thesis_dataset\use_wav_raw\664564979\2143063814.wav	0	2	[0.5370429754, 1.2679268122, 1.4162986279, 0.1439393163, 0.143864736, 0.3357157707]	0.537043	1.26793	1.4163	0.143939	0.143865	0.335716
638	758	jd	cy_724088122_3384716251.wav	D:\hc--document\all text\P8_medical\thesis_dataset\use_wav_raw\724088122\3384716251.wav	0	2	[0.3324704766, 1.7999331951, 1.6320871115, 0.1097572073, 0.2778981328, 0.4756439328]	0.33247	1.79993	1.63209	0.109757	0.277898	0.475644
639	501	wz	cy_621316990_1908912212.wav	D:\hc--document\all text\P8_medical\thesis_dataset\use_wav_raw\621316990\1908912212.wav	0	3	[0.3953105211, 1.5903178453, 1.6370989084, 0.0634424388, 0.4890355766, 0.1578368098]	0.395311	1.59032	1.6371	0.0634424	0.489036	0.157837
640	1612	rouhe	cy_714720272_3167170328.wav	D:\hc--document\all text\P8_medical\thesis_dataset\use_wav_raw\714720272\3167170328.wav	0	4	[1.3410294056, 0.0, 0.3041278422, 0.6966564059, 1.1917943954, 0.6485307217]	1.34103	0	0.304128	0.696656	1.19179	0.648531
641	834	general	cy_271763713_512715242.wav	D:\hc--document\all text\P8_medical\thesis_dataset\use_wav_raw\271763713\512715242.wav	0	0	[1.1937441826, 0.1484670341, 0.4147770107, 0.4593876004, 0.8628525138, 0.743385911]	1.19374	0.148467	0.414777	0.459388	0.862853	0.743386
642	1442	wz	cy_675920965_2332613712.wav	D:\hc--document\all text\P8_medical\thesis_dataset\use_wav_raw\675920965\2332613712.wav	0	3	[1.23115623, 0.0104030045, 0.3311125934, 0.2897489667, 1.4728753567, 0.2467402816]	1.23116	0.010403	0.331113	0.289749	1.47288	0.24674
643	185	fn	cy_700530476_2863249284.wav	D:\hc--document\all text\P8_medical\thesis_dataset\use_wav_raw\700530476\2863249284.wav	0	1	[0.4191154838, 1.6146588326, 1.6243050098, 0.0967109725, 0.3159390092, 0.2685319781]	0.419115	1.61466	1.62431	0.096711	0.315939	0.268532
644	466	general	dx_91036990_30179184.wav	D:\hc--document\all text\P8_medical\thesis_dataset\use_wav_raw\91036990\30179184.wav	0	0	[1.0887506008, 0.1278602332, 0.1729575694, 1.2802711725, 0.2148580253, 1.0217536688]	1.08875	0.12786	0.172958	1.28027	0.214858	1.02175
645	1395	jd	cy_715060952_3175605993.wav	D:\hc--document\all text\P8_medical\thesis_dataset\use_wav_raw\715060952\3175605993.wav	0	2	[0.2924416959, 1.8399631977, 1.7301907539, 0.1014159024, 0.3435652256, 0.3053845465]	0.292442	1.83996	1.73019	0.101416	0.343565	0.305385
646	1529	yl	cy_710535160_3083523879.wav	D:\hc--document\all text\P8_medical\thesis_dataset\use_wav_raw\710535160\3083523879.wav	0	5	[1.0457465649, 0.3750962615, 0.4980790615, 0.3688150942, 0.2738220096, 1.1679860353]	1.04575	0.375096	0.498079	0.368815	0.273822	1.16799
647	1203	yl	cy_656406686_2095429283.wav	D:\hc--document\all text\P8_medical\thesis_dataset\use_wav_raw\656406686\2095429283.wav	0	5	[1.1552333832, 0.0, 0.3794717491, 0.4816611111, 1.3922299147, 0.3306530714]	1.15523	0	0.379472	0.481661	1.39223	0.330653
648	636	yl	cy_711645647_3104889906.wav	D:\hc--document\all text\P8_medical\thesis_dataset\use_wav_raw\711645647\3104889906.wav	0	5	[0.9788592458, 0.0327349603, 0.2276362181, 1.5268708467, 0.3829594553, 0.7162871361]	0.978859	0.032735	0.227636	1.52687	0.382959	0.716287
649	199	yl	dx_86761933_25220907.wav	D:\hc--document\all text\P8_medical\thesis_dataset\use_wav_raw\86761933\25220907.wav	0	5	[0.9818999767, 0.0, 0.3496363759, 1.1803190708, 0.997359097, 0.5777629018]	0.9819	0	0.349636	1.18032	0.997359	0.577763
650	386	jd	cy_567338328_1623774191.wav	D:\hc--document\all text\P8_medical\thesis_dataset\use_wav_raw\567338328\1623774191.wav	0	2	[0.3926045895, 1.6410480738, 1.7128936052, 0.1223193184, 0.3900629878, 0.3442061245]	0.392605	1.64105	1.71289	0.122319	0.390063	0.344206
651	570	fn	cy_714649533_3166551916.wav	D:\hc--document\all text\P8_medical\thesis_dataset\use_wav_raw\714649533\3166551916.wav	0	1	[0.3950846493, 1.72217381, 1.6307806969, 0.0440874621, 0.2983554602, 0.3139173687]	0.395085	1.72217	1.63078	0.0440875	0.298355	0.313917
652	233	general	cy_724240275_3388865419.wav	D:\hc--document\all text\P8_medical\thesis_dataset\use_wav_raw\724240275\3388865419.wav	0	0	[1.0241020918, 0.1262197047, 0.2151022553, 1.4648909569, 0.5671725869, 0.7663083076]	1.0241	0.12622	0.215102	1.46489	0.567173	0.766308
653	323	fn	cy_655467113_2090146184.wav	D:\hc--document\all text\P8_medical\thesis_dataset\use_wav_raw\655467113\2090146184.wav	0	1	[1.1385326385, 0.5136864185, 0.7504825592, 0.2948299944, 0.5361832976, 1.1184314489]	1.13853	0.513686	0.750483	0.29483	0.536183	1.11843
654	1396	rouhe	cy_579715165_1689842243.wav	D:\hc--document\all text\P8_medical\thesis_dataset\use_wav_raw\579715165\1689842243.wav	0	4	[0.9108220935, 0.0, 0.2333938926, 1.3562661409, 1.2133029699, 0.3743228018]	0.910822	0	0.233394	1.35627	1.2133	0.374323
655	259	fn	cy_423951770_1023742890.wav	D:\hc--document\all text\P8_medical\thesis_dataset\use_wav_raw\423951770\1023742890.wav	0	1	[0.6024959087, 1.2841870785, 1.4343563318, 0.1241520867, 0.3272958994, 0.2191459686]	0.602496	1.28419	1.43436	0.124152	0.327296	0.219146
656	390	jd	cy_721448088_3323946194.wav	D:\hc--document\all text\P8_medical\thesis_dataset\use_wav_raw\721448088\3323946194.wav	0	2	[0.3106689453, 1.7271132469, 1.6400432587, 0.0753165483, 0.2522740066, 0.3087204695]	0.310669	1.72711	1.64004	0.0753165	0.252274	0.30872
657	883	general	cy_723382209_3368086483.wav	D:\hc--document\all text\P8_medical\thesis_dataset\use_wav_raw\723382209\3368086483.wav	0	0	[1.1680703163, 0.0, 0.0965510905, 1.2004210949, 0.4014348388, 0.8737524152]	1.16807	0	0.0965511	1.20042	0.401435	0.873752
658	1693	jd	dx_87600092_25641987.wav	D:\hc--document\all text\P8_medical\thesis_dataset\use_wav_raw\87600092\25641987.wav	0	2	[0.3581101298, 1.6961067915, 1.6988817453, 0.0846305266, 0.2234846652, 0.3074297905]	0.35811	1.69611	1.69888	0.0846305	0.223485	0.30743
659	1573	wz	cy_684180867_2511586578.wav	D:\hc--document\all text\P8_medical\thesis_dataset\use_wav_raw\684180867\2511586578.wav	0	3	[0.9326287508, 0.0551237389, 0.22166875, 1.4840250015, 0.9493591189, 0.2725684643]	0.932629	0.0551237	0.221669	1.48403	0.949359	0.272568
660	586	jd	cy_589413773_1742019488.wav	D:\hc--document\all text\P8_medical\thesis_dataset\use_wav_raw\589413773\1742019488.wav	0	2	[0.4624794424, 1.3166465759, 1.3937467337, 0.1933372319, 0.2712023556, 0.4540014565]	0.462479	1.31665	1.39375	0.193337	0.271202	0.454001
661	1438	wz	cy_714667158_3166207264.wav	D:\hc--document\all text\P8_medical\thesis_dataset\use_wav_raw\714667158\3166207264.wav	0	3	[1.0304348469, 0.0607501417, 0.2809338868, 1.3505561352, 0.5458682775, 0.7045800686]	1.03043	0.0607501	0.280934	1.35056	0.545868	0.70458
662	1018	general	dx_87555856_28234058.wav	D:\hc--document\all text\P8_medical\thesis_dataset\use_wav_raw\87555856\28234058.wav	0	0	[1.0619636774, 0.0630440339, 0.2122315913, 1.2924449444, 0.5075418949, 0.785987556]	1.06196	0.063044	0.212232	1.29244	0.507542	0.785988
663	1393	general	dx_91705863_31699217.wav	D:\hc--document\all text\P8_medical\thesis_dataset\use_wav_raw\91705863\31699217.wav	0	0	[0.9947000146, 0.0, 0.2238400578, 1.3144893646, 1.165288806, 0.3141440451]	0.9947	0	0.22384	1.31449	1.16529	0.314144
664	395	yl	cy_711625058_3104552636.wav	D:\hc--document\all text\P8_medical\thesis_dataset\use_wav_raw\711625058\3104552636.wav	0	5	[1.096773982, 0.4689959288, 0.2962825894, 0.8554720879, 0.2031362951, 1.5091975927]	1.09677	0.468996	0.296283	0.855472	0.203136	1.5092
665	1429	rouhe	cy_697778448_2801704872.wav	D:\hc--document\all text\P8_medical\thesis_dataset\use_wav_raw\697778448\2801704872.wav	0	4	[1.2052947283, 0.1199459508, 0.2714687288, 0.7610948682, 0.7456924319, 1.0584007502]	1.20529	0.119946	0.271469	0.761095	0.745692	1.0584
666	1547	yl	cy_695704068_2759578856.wav	D:\hc--document\all text\P8_medical\thesis_dataset\use_wav_raw\695704068\2759578856.wav	0	5	[1.259496212, 0.0116943046, 0.2759419382, 0.3216576278, 1.2241491079, 0.4051043093]	1.2595	0.0116943	0.275942	0.321658	1.22415	0.405104
667	78	general	cy_582065766_1702560089.wav	D:\hc--document\all text\P8_medical\thesis_dataset\use_wav_raw\582065766\1702560089.wav	0	0	[1.2976725101, 0.0, 0.3682532609, 0.4678712785, 1.1438444853, 0.7275109887]	1.29767	0	0.368253	0.467871	1.14384	0.727511
668	1626	jd	cy_660005255_2115355256.wav	D:\hc--document\all text\P8_medical\thesis_dataset\use_wav_raw\660005255\2115355256.wav	0	2	[0.5348674059, 0.9121302962, 1.3505263329, 0.1679185778, 0.3258350492, 0.1996700764]	0.534867	0.91213	1.35053	0.167919	0.325835	0.19967
669	538	rouhe	cy_717917045_3243562091.wav	D:\hc--document\all text\P8_medical\thesis_dataset\use_wav_raw\717917045\3243562091.wav	0	4	[1.2117502689, 0.1313198358, 0.30060637, 0.509377718, 1.4698191881, 0.3567433953]	1.21175	0.13132	0.300606	0.509378	1.46982	0.356743
670	1743	jd	cy_693609636_2713908844.wav	D:\hc--document\all text\P8_medical\thesis_dataset\use_wav_raw\693609636\2713908844.wav	0	2	[1.1502052546, 0.4507271051, 0.5139973164, 0.4293780029, 0.7373915315, 1.1480718851]	1.15021	0.450727	0.513997	0.429378	0.737392	1.14807
671	1521	jd	cy_677968913_2376395864.wav	D:\hc--document\all text\P8_medical\thesis_dataset\use_wav_raw\677968913\2376395864.wav	0	2	[0.3278461099, 1.6434899569, 1.8194308281, 0.0, 0.2840722203, 0.2017816603]	0.327846	1.64349	1.81943	0	0.284072	0.201782
672	1709	yl	cy_562344346_1597676705.wav	D:\hc--document\all text\P8_medical\thesis_dataset\use_wav_raw\562344346\1597676705.wav	0	5	[0.1509456336, 1.9495955706, 1.6982400417, 0.0832398981, 0.0954416096, 0.5991030335]	0.150946	1.9496	1.69824	0.0832399	0.0954416	0.599103
673	1436	general	cy_705862294_2985680652.wav	D:\hc--document\all text\P8_medical\thesis_dataset\use_wav_raw\705862294\2985680652.wav	0	0	[1.0605148077, 0.0524373502, 0.3719851077, 1.1735538244, 1.0914530754, 0.3761425316]	1.06051	0.0524374	0.371985	1.17355	1.09145	0.376143
674	1263	fn	cy_652223605_2074206023.wav	D:\hc--document\all text\P8_medical\thesis_dataset\use_wav_raw\652223605\2074206023.wav	0	1	[0.2510833442, 2.009860754, 1.7358814478, 0.040928781, 0.2475746423, 0.3398191631]	0.251083	2.00986	1.73588	0.0409288	0.247575	0.339819
675	304	yl	cy_723298858_3366510109.wav	D:\hc--document\all text\P8_medical\thesis_dataset\use_wav_raw\723298858\3366510109.wav	0	5	[1.0449278355, 0.3075357378, 0.5506238937, 0.3870100975, 0.1796995252, 1.120614171]	1.04493	0.307536	0.550624	0.38701	0.1797	1.12061
676	334	jd	cy_231585058_396709452.wav	D:\hc--document\all text\P8_medical\thesis_dataset\use_wav_raw\231585058\396709452.wav	0	2	[0.221277386, 1.8839125633, 1.7338783741, 0.0899815112, 0.3231492043, 0.4005141556]	0.221277	1.88391	1.73388	0.0899815	0.323149	0.400514
677	1646	general	cy_682003205_2464092216.wav	D:\hc--document\all text\P8_medical\thesis_dataset\use_wav_raw\682003205\2464092216.wav	0	0	[0.471678257, 1.2682328224, 1.3689037561, 0.1840684712, 0.0639597476, 0.5053980947]	0.471678	1.26823	1.3689	0.184068	0.0639597	0.505398
678	457	wz	dx_84214071_26765725.wav	D:\hc--document\all text\P8_medical\thesis_dataset\use_wav_raw\84214071\26765725.wav	0	3	[0.9267044067, 0.0596264079, 0.3206862509, 1.360712409, 1.0318903923, 0.3070566654]	0.926704	0.0596264	0.320686	1.36071	1.03189	0.307057
679	1221	general	dx_92613196_32335764.wav	D:\hc--document\all text\P8_medical\thesis_dataset\use_wav_raw\92613196\32335764.wav	0	0	[1.1591733694, 0.0, 0.1788455397, 1.1395822763, 0.5078356266, 0.962276876]	1.15917	0	0.178846	1.13958	0.507836	0.962277
680	967	yl	dx_89199037_31177018.wav	D:\hc--document\all text\P8_medical\thesis_dataset\use_wav_raw\89199037\31177018.wav	0	5	[1.0663129091, 0.2869976163, 0.4084283113, 0.5432541966, 0.366461724, 1.1815577745]	1.06631	0.286998	0.408428	0.543254	0.366462	1.18156
681	443	wz	cy_678564170_2388940302.wav	D:\hc--document\all text\P8_medical\thesis_dataset\use_wav_raw\678564170\2388940302.wav	0	3	[1.048251152, 0.0660922751, 0.1573180705, 1.4237244129, 0.9150164127, 0.4076294601]	1.04825	0.0660923	0.157318	1.42372	0.915016	0.407629
682	849	yl	cy_688114539_2596469756.wav	D:\hc--document\all text\P8_medical\thesis_dataset\use_wav_raw\688114539\2596469756.wav	0	5	[0.4715634584, 1.5094329119, 1.3135745525, 0.1495650709, 0.1887603402, 1.0757108927]	0.471563	1.50943	1.31357	0.149565	0.18876	1.07571
683	554	yl	cy_702947476_2916936646.wav	D:\hc--document\all text\P8_medical\thesis_dataset\use_wav_raw\702947476\2916936646.wav	0	5	[1.2504264116, 0.2907720506, 0.1902144849, 0.9126749635, 0.5816550255, 1.2579895258]	1.25043	0.290772	0.190214	0.912675	0.581655	1.25799
684	243	jd	dx_90774307_30000057.wav	D:\hc--document\all text\P8_medical\thesis_dataset\use_wav_raw\90774307\30000057.wav	0	2	[1.1370267868, 0.040605776, 0.3500775099, 0.6803725362, 0.8309607506, 0.8435255885]	1.13703	0.0406058	0.350078	0.680373	0.830961	0.843526
685	649	rouhe	cy_718259544_3251651802.wav	D:\hc--document\all text\P8_medical\thesis_dataset\use_wav_raw\718259544\3251651802.wav	0	4	[1.2317354679, 0.0986237004, 0.4171115458, 0.1763661206, 0.8970707059, 0.6486057043]	1.23174	0.0986237	0.417112	0.176366	0.897071	0.648606
686	377	rouhe	dx_89989787_28668420.wav	D:\hc--document\all text\P8_medical\thesis_dataset\use_wav_raw\89989787\28668420.wav	0	4	[1.1052918434, 0.1335515827, 0.1982490718, 1.1470113993, 1.2191431522, 0.5307750106]	1.10529	0.133552	0.198249	1.14701	1.21914	0.530775
687	556	wz	cy_723266932_3365837269.wav	D:\hc--document\all text\P8_medical\thesis_dataset\use_wav_raw\723266932\3365837269.wav	0	3	[0.8604024649, 0.0841633454, 0.3058561385, 1.4657560587, 1.2155555487, 0.4245941043]	0.860402	0.0841633	0.305856	1.46576	1.21556	0.424594
688	1249	yl	cy_715545375_3186495341.wav	D:\hc--document\all text\P8_medical\thesis_dataset\use_wav_raw\715545375\3186495341.wav	0	5	[1.1618232727, 0.7167819142, 0.6288167834, 0.4280138016, 0.6651217937, 1.3660144806]	1.16182	0.716782	0.628817	0.428014	0.665122	1.36601
689	891	general	cy_676482004_2344278792.wav	D:\hc--document\all text\P8_medical\thesis_dataset\use_wav_raw\676482004\2344278792.wav	0	0	[1.0627697706, 0.0, 0.1153685972, 1.1877143383, 0.9301120639, 0.5086761713]	1.06277	0	0.115369	1.18771	0.930112	0.508676
690	1548	wz	dx_74949627_21211022.wav	D:\hc--document\all text\P8_medical\thesis_dataset\use_wav_raw\74949627\21211022.wav	0	3	[0.9724549055, 0.0660983175, 0.1989147514, 1.5030092001, 0.7336972952, 0.574143827]	0.972455	0.0660983	0.198915	1.50301	0.733697	0.574144
691	971	fn	dx_58317320_15894055.wav	D:\hc--document\all text\P8_medical\thesis_dataset\use_wav_raw\58317320\15894055.wav	0	1	[0.2521340549, 1.9991202354, 1.693115592, 0.104911387, 0.2200811803, 0.3765617013]	0.252134	1.99912	1.69312	0.104911	0.220081	0.376562
692	927	jd	cy_715702139_3191382270.wav	D:\hc--document\all text\P8_medical\thesis_dataset\use_wav_raw\715702139\3191382270.wav	0	2	[0.2858254015, 1.6114076376, 1.6147899628, 0.096691519, 0.168462947, 0.4963622093]	0.285825	1.61141	1.61479	0.0966915	0.168463	0.496362
693	1374	jd	dx_91964595_31083800.wav	D:\hc--document\all text\P8_medical\thesis_dataset\use_wav_raw\91964595\31083800.wav	0	2	[0.1973075569, 1.9646024704, 1.7414344549, 0.1067221388, 0.1474939138, 0.4947760999]	0.197308	1.9646	1.74143	0.106722	0.147494	0.494776
694	1416	jd	cy_657361689_2100719747.wav	D:\hc--document\all text\P8_medical\thesis_dataset\use_wav_raw\657361689\2100719747.wav	0	2	[0.3685475886, 1.6493109465, 1.7169001102, 0.0080690989, 0.2860268652, 0.2181272358]	0.368548	1.64931	1.7169	0.0080691	0.286027	0.218127
695	940	fn	dx_79161014_22506352.wav	D:\hc--document\all text\P8_medical\thesis_dataset\use_wav_raw\79161014\22506352.wav	0	1	[0.1940891147, 1.9350010157, 1.7237958908, 0.0608539805, 0.1245267689, 0.5134459734]	0.194089	1.935	1.7238	0.060854	0.124527	0.513446
696	560	yl	cy_707068960_3013256090.wav	D:\hc--document\all text\P8_medical\thesis_dataset\use_wav_raw\707068960\3013256090.wav	0	5	[1.2734193802, 0.2885391116, 0.2751761377, 0.5632894635, 0.6335379481, 1.0306797028]	1.27342	0.288539	0.275176	0.563289	0.633538	1.03068
697	1021	rouhe	dx_87903987_26139637.wav	D:\hc--document\all text\P8_medical\thesis_dataset\use_wav_raw\87903987\26139637.wav	0	4	[0.6479858756, 1.3103106022, 1.1667487621, 0.2229724228, 0.4127266109, 0.8391071558]	0.647986	1.31031	1.16675	0.222972	0.412727	0.839107
698	410	rouhe	dx_87312652_25000755.wav	D:\hc--document\all text\P8_medical\thesis_dataset\use_wav_raw\87312652\25000755.wav	0	4	[0.9173547029, 1.0021281242, 0.6840170026, 0.5975532532, 0.5530909896, 1.5102597475]	0.917355	1.00213	0.684017	0.597553	0.553091	1.51026
699	973	jd	dx_67346886_18870589.wav	D:\hc--document\all text\P8_medical\thesis_dataset\use_wav_raw\67346886\18870589.wav	0	2	[0.4617008567, 1.4184463024, 1.536981225, 0.0933960602, 0.1791693866, 0.3401693702]	0.461701	1.41845	1.53698	0.0933961	0.179169	0.340169
700	1301	wz	dx_72388687_20302633.wav	D:\hc--document\all text\P8_medical\thesis_dataset\use_wav_raw\72388687\20302633.wav	0	3	[0.9701188803, 0.1283657998, 0.2572637796, 1.4548871517, 0.7349922061, 0.586656034]	0.970119	0.128366	0.257264	1.45489	0.734992	0.586656
701	1565	wz	cy_714741982_3168478330.wav	D:\hc--document\all text\P8_medical\thesis_dataset\use_wav_raw\714741982\3168478330.wav	0	3	[1.0445556641, 0.1801229119, 0.2980131805, 1.1919666529, 1.4254873991, 0.2458414882]	1.04456	0.180123	0.298013	1.19197	1.42549	0.245841
702	1495	fn	cy_724165279_3387807303.wav	D:\hc--document\all text\P8_medical\thesis_dataset\use_wav_raw\724165279\3387807303.wav	0	1	[0.1784232706, 1.904540658, 1.763764143, 0.0752285123, 0.2083332688, 0.4088900983]	0.178423	1.90454	1.76376	0.0752285	0.208333	0.40889
703	119	fn	dx_91347924_30591815.wav	D:\hc--document\all text\P8_medical\thesis_dataset\use_wav_raw\91347924\30591815.wav	0	1	[0.4490301311, 1.4924345016, 1.5402673483, 0.1365050375, 0.3439488113, 0.7171609998]	0.44903	1.49243	1.54027	0.136505	0.343949	0.717161
704	73	rouhe	cy_684270245_2513587192.wav	D:\hc--document\all text\P8_medical\thesis_dataset\use_wav_raw\684270245\2513587192.wav	0	4	[1.181358695, 0.0, 0.4347400665, 0.3145846426, 0.8262348771, 0.5625350475]	1.18136	0	0.43474	0.314585	0.826235	0.562535
705	1776	wz	dx_83982364_30382526.wav	D:\hc--document\all text\P8_medical\thesis_dataset\use_wav_raw\83982364\30382526.wav	0	3	[0.9138872623, 0.0162723232, 0.2383995056, 1.4329645634, 1.0061842203, 0.3952759504]	0.913887	0.0162723	0.2384	1.43296	1.00618	0.395276
706	1337	general	dx_87419851_25609773.wav	D:\hc--document\all text\P8_medical\thesis_dataset\use_wav_raw\87419851\25609773.wav	0	0	[1.0695618391, 0.4788305461, 0.275265336, 0.9157893062, 0.3554928005, 1.4162272215]	1.06956	0.478831	0.275265	0.915789	0.355493	1.41623
707	1107	general	dx_87134896_26870791.wav	D:\hc--document\all text\P8_medical\thesis_dataset\use_wav_raw\87134896\26870791.wav	0	0	[0.9695978165, 0.3875969648, 0.6828066111, 0.2025059313, 0.8144882917, 0.3285854459]	0.969598	0.387597	0.682807	0.202506	0.814488	0.328585
708	589	wz	dx_91024530_30116251.wav	D:\hc--document\all text\P8_medical\thesis_dataset\use_wav_raw\91024530\30116251.wav	0	3	[1.073523283, 0.0460257083, 0.1912896037, 1.2805649042, 0.4617908895, 0.9120470881]	1.07352	0.0460257	0.19129	1.28056	0.461791	0.912047
709	1044	yl	cy_724079138_3386011936.wav	D:\hc--document\all text\P8_medical\thesis_dataset\use_wav_raw\724079138\3386011936.wav	0	5	[0.9774695635, 0.308655411, 0.5525937676, 0.4375320375, 0.231801793, 1.2269738913]	0.97747	0.308655	0.552594	0.437532	0.231802	1.22697
710	92	fn	cy_719786390_3286366131.wav	D:\hc--document\all text\P8_medical\thesis_dataset\use_wav_raw\719786390\3286366131.wav	0	1	[0.2520186603, 1.8409497738, 1.8009934425, 0.0517793074, 0.2843109369, 0.3615781665]	0.252019	1.84095	1.80099	0.0517793	0.284311	0.361578
711	1238	rouhe	cy_689321460_2623751050.wav	D:\hc--document\all text\P8_medical\thesis_dataset\use_wav_raw\689321460\2623751050.wav	0	4	[1.2808753252, 0.0, 0.2545692623, 0.6010411978, 1.3858731985, 0.2939555347]	1.28088	0	0.254569	0.601041	1.38587	0.293956
712	719	general	cy_721860681_3332428589.wav	D:\hc--document\all text\P8_medical\thesis_dataset\use_wav_raw\721860681\3332428589.wav	0	0	[1.1138346195, 0.2211021632, 0.5164016485, 0.2284196317, 1.04045856, 0.4824179411]	1.11383	0.221102	0.516402	0.22842	1.04046	0.482418
713	400	general	cy_701237354_2878895578.wav	D:\hc--document\all text\P8_medical\thesis_dataset\use_wav_raw\701237354\2878895578.wav	0	0	[0.9899895191, 0.2911472321, 0.6984034777, 0.2885571122, 0.5930620432, 0.5716556311]	0.98999	0.291147	0.698403	0.288557	0.593062	0.571656
714	1543	yl	cy_677769287_2371915110.wav	D:\hc--document\all text\P8_medical\thesis_dataset\use_wav_raw\677769287\2371915110.wav	0	5	[1.1370346546, 0.2255930901, 0.1666198969, 1.0111875534, 0.2390449345, 1.229151845]	1.13703	0.225593	0.16662	1.01119	0.239045	1.22915
715	1024	general	cy_641000825_2014152242.wav	D:\hc--document\all text\P8_medical\thesis_dataset\use_wav_raw\641000825\2014152242.wav	0	0	[1.2386757135, 0.0354014114, 0.3570577204, 0.3002320528, 0.9651952386, 0.486235708]	1.23868	0.0354014	0.357058	0.300232	0.965195	0.486236
716	530	fn	cy_568845750_1631530601.wav	D:\hc--document\all text\P8_medical\thesis_dataset\use_wav_raw\568845750\1631530601.wav	0	1	[0.2670356929, 1.8123468161, 1.7741464376, 0.0597745776, 0.2088149339, 0.3739898205]	0.267036	1.81235	1.77415	0.0597746	0.208815	0.37399
717	1731	fn	cy_707650264_3025251790.wav	D:\hc--document\all text\P8_medical\thesis_dataset\use_wav_raw\707650264\3025251790.wav	0	1	[0.1913188845, 1.9773645401, 1.6753281355, 0.0882633701, 0.2618499994, 0.41171211]	0.191319	1.97736	1.67533	0.0882634	0.26185	0.411712
718	1621	rouhe	dx_91430570_30669027.wav	D:\hc--document\all text\P8_medical\thesis_dataset\use_wav_raw\91430570\30669027.wav	0	4	[1.1179043055, 0.079512991, 0.3577207029, 0.5319883823, 1.4072024822, 0.2918591797]	1.1179	0.079513	0.357721	0.531988	1.4072	0.291859
719	650	fn	cy_705603574_2982096330.wav	D:\hc--document\all text\P8_medical\thesis_dataset\use_wav_raw\705603574\2982096330.wav	0	1	[0.2085220665, 1.8652299643, 1.6876859665, 0.1375049502, 0.2370325327, 0.57992208]	0.208522	1.86523	1.68769	0.137505	0.237033	0.579922
720	376	general	dx_89190953_31132902.wav	D:\hc--document\all text\P8_medical\thesis_dataset\use_wav_raw\89190953\31132902.wav	0	0	[1.0062258244, 0.2716767788, 0.5644242167, 0.4169239104, 0.4094161987, 1.0122672319]	1.00623	0.271677	0.564424	0.416924	0.409416	1.01227
721	661	fn	dx_90828224_30269199.wav	D:\hc--document\all text\P8_medical\thesis_dataset\use_wav_raw\90828224\30269199.wav	0	1	[0.3046323955, 1.9330312014, 1.6246578693, 0.1103326529, 0.3254548609, 0.356874764]	0.304632	1.93303	1.62466	0.110333	0.325455	0.356875
722	1632	wz	cy_633995051_1976528384.wav	D:\hc--document\all text\P8_medical\thesis_dataset\use_wav_raw\633995051\1976528384.wav	0	3	[1.0018376112, 0.0718210042, 0.1201459989, 1.2757953405, 0.4098078012, 1.0260006189]	1.00184	0.071821	0.120146	1.2758	0.409808	1.026
723	1323	wz	cy_716153125_3202243100.wav	D:\hc--document\all text\P8_medical\thesis_dataset\use_wav_raw\716153125\3202243100.wav	0	3	[1.115306139, 0.0, 0.1466257125, 1.2008199692, 0.5261681676, 0.8809491992]	1.11531	0	0.146626	1.20082	0.526168	0.880949
724	1113	wz	cy_689362224_2623552072.wav	D:\hc--document\all text\P8_medical\thesis_dataset\use_wav_raw\689362224\2623552072.wav	0	3	[1.2736084461, 0.3695244789, 0.2475745082, 1.0104612112, 0.5869441628, 1.1911008358]	1.27361	0.369524	0.247575	1.01046	0.586944	1.1911
725	132	yl	cy_716115266_3199750870.wav	D:\hc--document\all text\P8_medical\thesis_dataset\use_wav_raw\716115266\3199750870.wav	0	5	[0.3497001529, 1.7952115536, 1.5941102505, 0.0408628918, 0.1261114925, 0.5826536417]	0.3497	1.79521	1.59411	0.0408629	0.126111	0.582654
726	379	yl	cy_684303444_2514349442.wav	D:\hc--document\all text\P8_medical\thesis_dataset\use_wav_raw\684303444\2514349442.wav	0	5	[1.2114737034, 0.2787149251, 0.4057971239, 0.4440856576, 0.3603267968, 1.1642973423]	1.21147	0.278715	0.405797	0.444086	0.360327	1.1643
727	1675	jd	dx_48814499_12675211.wav	D:\hc--document\all text\P8_medical\thesis_dataset\use_wav_raw\48814499\12675211.wav	0	2	[0.4337964654, 1.5377770662, 1.6485697031, 0.0703191012, 0.2318125665, 0.2783932984]	0.433796	1.53778	1.64857	0.0703191	0.231813	0.278393
728	62	wz	dx_88320167_26879791.wav	D:\hc--document\all text\P8_medical\thesis_dataset\use_wav_raw\88320167\26879791.wav	0	3	[1.1410777569, 0.6240045428, 0.3248982131, 0.776373744, 0.6415256858, 1.3680775166]	1.14108	0.624005	0.324898	0.776374	0.641526	1.36808
729	1636	yl	cy_683992446_2507495676.wav	D:\hc--document\all text\P8_medical\thesis_dataset\use_wav_raw\683992446\2507495676.wav	0	5	[1.0905640125, 0.7363314033, 0.5394204855, 0.5601412058, 0.6698874831, 1.1983692646]	1.09056	0.736331	0.53942	0.560141	0.669887	1.19837
730	1403	general	cy_724692909_3399806948.wav	D:\hc--document\all text\P8_medical\thesis_dataset\use_wav_raw\724692909\3399806948.wav	0	0	[1.0044468641, 0.0, 0.4742476642, 0.7910305858, 1.5162767172, 0.0040796823]	1.00445	0	0.474248	0.791031	1.51628	0.00407968
731	829	jd	cy_667288842_2152988732.wav	D:\hc--document\all text\P8_medical\thesis_dataset\use_wav_raw\667288842\2152988732.wav	0	2	[0.603915751, 0.992654264, 1.3494163752, 0.1525921077, 0.2130075544, 0.1070047766]	0.603916	0.992654	1.34942	0.152592	0.213008	0.107005
732	1102	general	cy_687465211_2582295030.wav	D:\hc--document\all text\P8_medical\thesis_dataset\use_wav_raw\687465211\2582295030.wav	0	0	[0.6051818728, 0.9078245163, 1.3115495443, 0.1992747486, 0.2635243535, 0.2177415192]	0.605182	0.907825	1.31155	0.199275	0.263524	0.217742
733	494	jd	cy_700139194_2854443904.wav	D:\hc--document\all text\P8_medical\thesis_dataset\use_wav_raw\700139194\2854443904.wav	0	2	[0.9490494132, 0.3326200843, 0.7598254681, 0.1949032247, 0.5919961929, 0.6040586829]	0.949049	0.33262	0.759825	0.194903	0.591996	0.604059
734	851	wz	dx_42118955_10716866.wav	D:\hc--document\all text\P8_medical\thesis_dataset\use_wav_raw\42118955\10716866.wav	0	3	[1.1454036236, 0.0, 0.1082771495, 1.1444797516, 0.1270482391, 1.0556809902]	1.1454	0	0.108277	1.14448	0.127048	1.05568
735	1338	wz	dx_87836340_25728130.wav	D:\hc--document\all text\P8_medical\thesis_dataset\use_wav_raw\87836340\25728130.wav	0	3	[0.9890710711, 0.0889921337, 0.2965537906, 1.2567964792, 1.3828943968, 0.2197176367]	0.989071	0.0889921	0.296554	1.2568	1.38289	0.219718
736	1146	yl	cy_674280405_2298119370.wav	D:\hc--document\all text\P8_medical\thesis_dataset\use_wav_raw\674280405\2298119370.wav	0	5	[0.8846936822, 0.0901532024, 0.2708330154, 1.438575983, 1.253365159, 0.2771817446]	0.884694	0.0901532	0.270833	1.43858	1.25337	0.277182
737	579	yl	dx_91367212_30339325.wav	D:\hc--document\all text\P8_medical\thesis_dataset\use_wav_raw\91367212\30339325.wav	0	5	[1.0325630903, 0.4195091724, 0.5682124496, 0.3312337101, 0.2992269099, 1.1561381817]	1.03256	0.419509	0.568212	0.331234	0.299227	1.15614
738	655	fn	cy_671034848_2229944498.wav	D:\hc--document\all text\P8_medical\thesis_dataset\use_wav_raw\671034848\2229944498.wav	0	1	[0.2455697656, 1.9991993904, 1.7396339178, 0.0833641589, 0.2081152499, 0.3380964994]	0.24557	1.9992	1.73963	0.0833642	0.208115	0.338096
739	899	yl	cy_715370027_3182567410.wav	D:\hc--document\all text\P8_medical\thesis_dataset\use_wav_raw\715370027\3182567410.wav	0	5	[1.1521897316, 0.4883785844, 0.2940137684, 0.7650921941, 0.2831029296, 1.3834605217]	1.15219	0.488379	0.294014	0.765092	0.283103	1.38346
740	1270	wz	dx_86998223_26111268.wav	D:\hc--document\all text\P8_medical\thesis_dataset\use_wav_raw\86998223\26111268.wav	0	3	[0.9756471515, 0.0, 0.1216530129, 1.3925198317, 0.8068418503, 0.604411602]	0.975647	0	0.121653	1.39252	0.806842	0.604412
741	666	wz	cy_721842168_3332617080.wav	D:\hc--document\all text\P8_medical\thesis_dataset\use_wav_raw\721842168\3332617080.wav	0	3	[1.1017010212, 0.0, 0.1902181059, 1.23969841, 0.4659110904, 0.866907537]	1.1017	0	0.190218	1.2397	0.465911	0.866908
742	177	jd	cy_722944997_3357711592.wav	D:\hc--document\all text\P8_medical\thesis_dataset\use_wav_raw\722944997\3357711592.wav	0	2	[1.1440365314, 0.1273214966, 0.3354616165, 0.6631451845, 1.1601396799, 0.5395105481]	1.14404	0.127321	0.335462	0.663145	1.16014	0.539511
743	1206	rouhe	cy_699236774_2834268330.wav	D:\hc--document\all text\P8_medical\thesis_dataset\use_wav_raw\699236774\2834268330.wav	0	4	[1.0036406517, 0.1745102406, 0.729542315, 0.2387941182, 1.3992413282, 0.0]	1.00364	0.17451	0.729542	0.238794	1.39924	0
744	833	general	cy_673915455_2290355160.wav	D:\hc--document\all text\P8_medical\thesis_dataset\use_wav_raw\673915455\2290355160.wav	0	0	[1.2997348309, 0.3835356236, 0.2180277854, 0.7918019295, 0.5930263996, 1.195826292]	1.29973	0.383536	0.218028	0.791802	0.593026	1.19583
745	65	wz	dx_90724895_29815152.wav	D:\hc--document\all text\P8_medical\thesis_dataset\use_wav_raw\90724895\29815152.wav	0	3	[1.0443917513, 0.0737913251, 0.2205417901, 1.4494093657, 0.8298570514, 0.5755323172]	1.04439	0.0737913	0.220542	1.44941	0.829857	0.575532
746	1668	wz	cy_682918139_2483708824.wav	D:\hc--document\all text\P8_medical\thesis_dataset\use_wav_raw\682918139\2483708824.wav	0	3	[1.0653642416, 0.0229711495, 0.1527200341, 1.3860449791, 0.5538715124, 0.8930739164]	1.06536	0.0229711	0.15272	1.38604	0.553872	0.893074
747	563	wz	cy_717665488_3235999776.wav	D:\hc--document\all text\P8_medical\thesis_dataset\use_wav_raw\717665488\3235999776.wav	0	3	[1.0671927929, 0.0566912144, 0.2405958474, 1.3801517487, 0.999663949, 0.3118996918]	1.06719	0.0566912	0.240596	1.38015	0.999664	0.3119
748	1385	general	dx_62391403_17009196.wav	D:\hc--document\all text\P8_medical\thesis_dataset\use_wav_raw\62391403\17009196.wav	0	0	[0.9559075236, 0.2366282195, 0.6395743489, 0.6417203546, 0.598941505, 0.4183360934]	0.955908	0.236628	0.639574	0.64172	0.598942	0.418336
749	1241	yl	dx_87873919_25960497.wav	D:\hc--document\all text\P8_medical\thesis_dataset\use_wav_raw\87873919\25960497.wav	0	5	[0.9550853968, 0.5693967938, 0.5994570255, 0.566641748, 0.3644100726, 1.4103252888]	0.955085	0.569397	0.599457	0.566642	0.36441	1.41033
750	1267	jd	cy_722267177_3341902772.wav	D:\hc--document\all text\P8_medical\thesis_dataset\use_wav_raw\722267177\3341902772.wav	0	2	[0.4655587971, 1.5128449202, 1.557522893, 0.1666687131, 0.4114735425, 0.4248076081]	0.465559	1.51284	1.55752	0.166669	0.411474	0.424808
751	537	wz	cy_715607374_3188804205.wav	D:\hc--document\all text\P8_medical\thesis_dataset\use_wav_raw\715607374\3188804205.wav	0	3	[0.9181894064, 0.009142397, 0.1734366864, 1.5139665604, 0.7551856041, 0.5702565908]	0.918189	0.0091424	0.173437	1.51397	0.755186	0.570257
752	196	general	cy_711711212_3106070957.wav	D:\hc--document\all text\P8_medical\thesis_dataset\use_wav_raw\711711212\3106070957.wav	0	0	[1.1060156822, 0.0576338097, 0.2205795497, 1.2667814493, 0.9354716539, 0.4936896861]	1.10602	0.0576338	0.22058	1.26678	0.935472	0.49369
753	71	rouhe	cy_706918404_3010049754.wav	D:\hc--document\all text\P8_medical\thesis_dataset\use_wav_raw\706918404\3010049754.wav	0	4	[1.18621099, 0.0952203423, 0.3084556758, 0.8157360554, 1.4519588947, 0.3923352659]	1.18621	0.0952203	0.308456	0.815736	1.45196	0.392335
754	1287	rouhe	cy_717909777_3242197649.wav	D:\hc--document\all text\P8_medical\thesis_dataset\use_wav_raw\717909777\3242197649.wav	0	4	[0.4833679199, 0.9182001948, 1.2821711302, 0.1624862999, 0.2832002938, 0.4331103265]	0.483368	0.9182	1.28217	0.162486	0.2832	0.43311
755	428	wz	dx_91263390_30158097.wav	D:\hc--document\all text\P8_medical\thesis_dataset\use_wav_raw\91263390\30158097.wav	0	3	[0.9775672555, 0.1566102952, 0.2028662115, 1.3371764421, 0.45394364, 0.9969941974]	0.977567	0.15661	0.202866	1.33718	0.453944	0.996994
756	722	general	cy_723498594_3371413742.wav	D:\hc--document\all text\P8_medical\thesis_dataset\use_wav_raw\723498594\3371413742.wav	0	0	[1.0814013481, 0.1656691283, 0.4384301305, 0.4569730461, 1.3206192255, 0.3283462226]	1.0814	0.165669	0.43843	0.456973	1.32062	0.328346
757	678	fn	cy_723841256_3378482487.wav	D:\hc--document\all text\P8_medical\thesis_dataset\use_wav_raw\723841256\3378482487.wav	0	1	[0.2581573725, 1.8329937458, 1.7123789787, 0.0977260321, 0.2206337303, 0.30406937]	0.258157	1.83299	1.71238	0.097726	0.220634	0.304069
758	1181	jd	cy_583449441_1709751440.wav	D:\hc--document\all text\P8_medical\thesis_dataset\use_wav_raw\583449441\1709751440.wav	0	2	[0.4462420046, 1.5146625042, 1.7109402418, 0.0305523407, 0.5028822422, 0.0]	0.446242	1.51466	1.71094	0.0305523	0.502882	0
759	1005	rouhe	dx_87852825_25829352.wav	D:\hc--document\all text\P8_medical\thesis_dataset\use_wav_raw\87852825\25829352.wav	0	4	[0.985887289, 0.0, 0.1657306105, 1.2887381315, 1.1532472372, 0.3943226933]	0.985887	0	0.165731	1.28874	1.15325	0.394323
760	1717	fn	dx_84276645_27101293.wav	D:\hc--document\all text\P8_medical\thesis_dataset\use_wav_raw\84276645\27101293.wav	0	1	[0.6988016367, 1.3396995068, 1.2881458998, 0.2089319825, 0.4408629537, 0.6669106483]	0.698802	1.3397	1.28815	0.208932	0.440863	0.666911
761	114	yl	cy_675559647_2324930738.wav	D:\hc--document\all text\P8_medical\thesis_dataset\use_wav_raw\675559647\2324930738.wav	0	5	[1.0195541382, 0.3110524714, 0.5328876972, 0.3579131663, 0.36968261, 1.1335041523]	1.01955	0.311052	0.532888	0.357913	0.369683	1.1335
762	1131	rouhe	cy_722254453_3340963250.wav	D:\hc--document\all text\P8_medical\thesis_dataset\use_wav_raw\722254453\3340963250.wav	0	4	[1.1933089495, 0.0413670391, 0.3969872892, 0.3041332662, 1.393404007, 0.2880178094]	1.19331	0.041367	0.396987	0.304133	1.3934	0.288018
763	330	rouhe	cy_723560374_3372273168.wav	D:\hc--document\all text\P8_medical\thesis_dataset\use_wav_raw\723560374\3372273168.wav	0	4	[0.9367927313, 0.0049145501, 0.4104349613, 1.1043262482, 1.3240146637, 0.2628861964]	0.936793	0.00491455	0.410435	1.10433	1.32401	0.262886
764	144	rouhe	cy_723115722_3362287975.wav	D:\hc--document\all text\P8_medical\thesis_dataset\use_wav_raw\723115722\3362287975.wav	0	4	[1.1090823412, 0.082545124, 0.4728173018, 0.1966848373, 1.2193084955, 0.345838666]	1.10908	0.0825451	0.472817	0.196685	1.21931	0.345839
765	793	jd	cy_722201519_3341123372.wav	D:\hc--document\all text\P8_medical\thesis_dataset\use_wav_raw\722201519\3341123372.wav	0	2	[0.5054447651, 0.9755362868, 1.3454596996, 0.1562342644, 0.3002826571, 0.2161259502]	0.505445	0.975536	1.34546	0.156234	0.300283	0.216126
766	1172	wz	cy_718754967_3261918292.wav	D:\hc--document\all text\P8_medical\thesis_dataset\use_wav_raw\718754967\3261918292.wav	0	3	[1.085808754, 0.1597595662, 0.5541117787, 0.2117443681, 0.7189614177, 0.7643416524]	1.08581	0.15976	0.554112	0.211744	0.718961	0.764342
767	124	general	dx_90483471_29253202.wav	D:\hc--document\all text\P8_medical\thesis_dataset\use_wav_raw\90483471\29253202.wav	0	0	[1.2165180445, 0.1462989599, 0.3643019795, 0.3945577443, 0.7411874533, 0.7151770592]	1.21652	0.146299	0.364302	0.394558	0.741187	0.715177
768	1553	yl	cy_720673672_3306195148.wav	D:\hc--document\all text\P8_medical\thesis_dataset\use_wav_raw\720673672\3306195148.wav	0	5	[1.1724843979, 0.5445093513, 0.2843311131, 0.8239043951, 0.4427384138, 1.4575213194]	1.17248	0.544509	0.284331	0.823904	0.442738	1.45752
769	1622	yl	cy_714815193_3169271593.wav	D:\hc--document\all text\P8_medical\thesis_dataset\use_wav_raw\714815193\3169271593.wav	0	5	[1.1510397196, 0.3974224627, 0.1937727928, 0.8121853471, 0.3855386078, 1.518635869]	1.15104	0.397422	0.193773	0.812185	0.385539	1.51864
770	255	jd	dx_90275835_29099590.wav	D:\hc--document\all text\P8_medical\thesis_dataset\use_wav_raw\90275835\29099590.wav	0	2	[0.2761416137, 1.8967545033, 1.6454999447, 0.142383188, 0.1593945175, 0.4713616669]	0.276142	1.89675	1.6455	0.142383	0.159395	0.471362
771	919	yl	dx_84478827_24173074.wav	D:\hc--document\all text\P8_medical\thesis_dataset\use_wav_raw\84478827\24173074.wav	0	5	[1.0230709314, 0.3625319898, 0.5980658531, 0.3257107735, 0.1878098249, 1.1942415237]	1.02307	0.362532	0.598066	0.325711	0.18781	1.19424
772	1062	wz	cy_637672090_1996385861.wav	D:\hc--document\all text\P8_medical\thesis_dataset\use_wav_raw\637672090\1996385861.wav	0	3	[1.0361589193, 0.0, 0.228584826, 1.2190849781, 0.5688445568, 0.8839929104]	1.03616	0	0.228585	1.21908	0.568845	0.883993
773	219	rouhe	dx_59819424_16272094.wav	D:\hc--document\all text\P8_medical\thesis_dataset\use_wav_raw\59819424\16272094.wav	0	4	[0.6756289005, 1.2609012127, 1.1474968195, 0.2398781925, 0.4054178894, 0.8282176852]	0.675629	1.2609	1.1475	0.239878	0.405418	0.828218
774	1382	general	cy_683812881_2503441554.wav	D:\hc--document\all text\P8_medical\thesis_dataset\use_wav_raw\683812881\2503441554.wav	0	0	[1.0692124367, 0.2128927708, 0.3874346614, 0.8294270039, 1.4603015184, 0.4662211537]	1.06921	0.212893	0.387435	0.829427	1.4603	0.466221
775	1207	wz	cy_703462708_2928775638.wav	D:\hc--document\all text\P8_medical\thesis_dataset\use_wav_raw\703462708\2928775638.wav	0	3	[1.1209334135, 0.3081924617, 0.4603888392, 0.4891202152, 0.3570999205, 1.0664858818]	1.12093	0.308192	0.460389	0.48912	0.3571	1.06649
776	470	yl	cy_717862235_3240866992.wav	D:\hc--document\all text\P8_medical\thesis_dataset\use_wav_raw\717862235\3240866992.wav	0	5	[1.0572853088, 0.3205233514, 0.4925167561, 0.4002819061, 0.3897688985, 1.1050591469]	1.05729	0.320523	0.492517	0.400282	0.389769	1.10506
777	197	general	cy_648298316_2051391257.wav	D:\hc--document\all text\P8_medical\thesis_dataset\use_wav_raw\648298316\2051391257.wav	0	0	[0.6726668477, 0.7567660809, 1.1809853315, 0.126972124, 0.6141368151, 0.0030480702]	0.672667	0.756766	1.18099	0.126972	0.614137	0.00304807
778	871	yl	cy_714791228_3169869132.wav	D:\hc--document\all text\P8_medical\thesis_dataset\use_wav_raw\714791228\3169869132.wav	0	5	[1.0214624405, 0.6890592575, 0.3242717087, 0.95518291, 0.3548580706, 1.4898774624]	1.02146	0.689059	0.324272	0.955183	0.354858	1.48988
779	240	general	cy_680192311_2426421754.wav	D:\hc--document\all text\P8_medical\thesis_dataset\use_wav_raw\680192311\2426421754.wav	0	0	[0.9337708354, 0.0015936645, 0.1990331262, 1.4760652781, 0.9118133783, 0.4891990125]	0.933771	0.00159366	0.199033	1.47607	0.911813	0.489199
780	1186	general	cy_603868655_1816087382.wav	D:\hc--document\all text\P8_medical\thesis_dataset\use_wav_raw\603868655\1816087382.wav	0	0	[1.1564902067, 0.1633405983, 0.3368783295, 0.8816538453, 0.7535251379, 1.0091913939]	1.15649	0.163341	0.336878	0.881654	0.753525	1.00919
781	612	jd	cy_614536815_1872080705.wav	D:\hc--document\all text\P8_medical\thesis_dataset\use_wav_raw\614536815\1872080705.wav	0	2	[0.7154421806, 1.1013839245, 1.2947328091, 0.110670954, 0.487273246, 0.3102066517]	0.715442	1.10138	1.29473	0.110671	0.487273	0.310207
782	1074	jd	dx_61776775_17654381.wav	D:\hc--document\all text\P8_medical\thesis_dataset\use_wav_raw\61776775\17654381.wav	0	2	[0.67475456, 0.6351541281, 1.1613143682, 0.1444973499, 0.4817882776, 0.3764494359]	0.674755	0.635154	1.16131	0.144497	0.481788	0.376449
783	943	fn	cy_723127533_3362117869.wav	D:\hc--document\all text\P8_medical\thesis_dataset\use_wav_raw\723127533\3362117869.wav	0	1	[0.2175254673, 1.9312028885, 1.6912676096, 0.0983924046, 0.2808244526, 0.4523454309]	0.217525	1.9312	1.69127	0.0983924	0.280824	0.452345
784	552	general	dx_87682949_26135515.wav	D:\hc--document\all text\P8_medical\thesis_dataset\use_wav_raw\87682949\26135515.wav	0	0	[1.086817503, 0.0044454443, 0.1717589945, 1.347260952, 0.3884497881, 0.7834525108]	1.08682	0.00444544	0.171759	1.34726	0.38845	0.783453
785	877	yl	cy_714366851_3159472230.wav	D:\hc--document\all text\P8_medical\thesis_dataset\use_wav_raw\714366851\3159472230.wav	0	5	[1.0034947395, 0.2978360355, 0.5633369684, 0.3154200912, 0.3982100785, 1.0712783337]	1.00349	0.297836	0.563337	0.31542	0.39821	1.07128
786	1418	jd	cy_29247542_21589631.wav	D:\hc--document\all text\P8_medical\thesis_dataset\use_wav_raw\29247542\21589631.wav	0	2	[0.5272386074, 1.5334479809, 1.558437705, 0.1317747533, 0.4851460457, 0.1367859244]	0.527239	1.53345	1.55844	0.131775	0.485146	0.136786
787	1352	general	cy_718103548_3247366640.wav	D:\hc--document\all text\P8_medical\thesis_dataset\use_wav_raw\718103548\3247366640.wav	0	0	[1.1220914125, 0.1947893947, 0.4200435579, 0.6260966659, 1.5497021675, 0.3624932468]	1.12209	0.194789	0.420044	0.626097	1.5497	0.362493
788	693	general	cy_692435805_2688675118.wav	D:\hc--document\all text\P8_medical\thesis_dataset\use_wav_raw\692435805\2688675118.wav	0	0	[1.2878572941, 0.0, 0.4151794016, 0.4399629533, 0.568880558, 0.856138289]	1.28786	0	0.415179	0.439963	0.568881	0.856138
789	1240	general	cy_266093627_496182638.wav	D:\hc--document\all text\P8_medical\thesis_dataset\use_wav_raw\266093627\496182638.wav	0	0	[1.0684969425, 0.2635230422, 0.6660808325, 0.2222925425, 0.915581286, 0.049596034]	1.0685	0.263523	0.666081	0.222293	0.915581	0.049596
790	1152	rouhe	cy_696875622_2781825314.wav	D:\hc--document\all text\P8_medical\thesis_dataset\use_wav_raw\696875622\2781825314.wav	0	4	[1.1963688135, 0.0, 0.3488639891, 0.3554961085, 1.5116117001, 0.3632804453]	1.19637	0	0.348864	0.355496	1.51161	0.36328
791	512	rouhe	cy_677993009_2376737652.wav	D:\hc--document\all text\P8_medical\thesis_dataset\use_wav_raw\677993009\2376737652.wav	0	4	[1.2039675713, 0.1027475446, 0.3128291965, 0.3558085561, 0.9654073715, 0.6780037284]	1.20397	0.102748	0.312829	0.355809	0.965407	0.678004
792	1633	yl	cy_715813049_3192894059.wav	D:\hc--document\all text\P8_medical\thesis_dataset\use_wav_raw\715813049\3192894059.wav	0	5	[1.0923467875, 0.0, 0.161702469, 1.2611135244, 0.4550060332, 0.9225040078]	1.09235	0	0.161702	1.26111	0.455006	0.922504
793	941	jd	cy_611479_2678200.wav	D:\hc--document\all text\P8_medical\thesis_dataset\use_wav_raw\611479\2678200.wav	0	2	[0.3483667672, 1.7593445778, 1.5875401497, 0.1142253727, 0.3810201883, 0.3652161062]	0.348367	1.75934	1.58754	0.114225	0.38102	0.365216
794	874	wz	dx_91839099_31055780.wav	D:\hc--document\all text\P8_medical\thesis_dataset\use_wav_raw\91839099\31055780.wav	0	3	[0.8664022684, 0.0876519233, 0.2120402008, 1.5072588921, 1.2658076286, 0.2645141184]	0.866402	0.0876519	0.21204	1.50726	1.26581	0.264514
795	228	wz	dx_91801399_30866986.wav	D:\hc--document\all text\P8_medical\thesis_dataset\use_wav_raw\91801399\30866986.wav	0	3	[0.9667137861, 0.1180069596, 0.2058841139, 1.4190132618, 0.4679241478, 0.8702558875]	0.966714	0.118007	0.205884	1.41901	0.467924	0.870256
796	1512	fn	dx_91019697_30088581.wav	D:\hc--document\all text\P8_medical\thesis_dataset\use_wav_raw\91019697\30088581.wav	0	1	[0.3657135665, 1.7407002449, 1.5487396717, 0.1711870879, 0.2666443586, 0.6061378717]	0.365714	1.7407	1.54874	0.171187	0.266644	0.606138
797	110	fn	dx_89511120_32273113.wav	D:\hc--document\all text\P8_medical\thesis_dataset\use_wav_raw\89511120\32273113.wav	0	1	[0.1704598963, 2.011651516, 1.7191346884, 0.0950557441, 0.2300197631, 0.4050880075]	0.17046	2.01165	1.71913	0.0950557	0.23002	0.405088
798	1383	fn	dx_91289641_30295463.wav	D:\hc--document\all text\P8_medical\thesis_dataset\use_wav_raw\91289641\30295463.wav	0	1	[0.3510334492, 1.9163531065, 1.5814118385, 0.1044726372, 0.3324976563, 0.353458792]	0.351033	1.91635	1.58141	0.104473	0.332498	0.353459
799	1305	yl	dx_84008845_30528977.wav	D:\hc--document\all text\P8_medical\thesis_dataset\use_wav_raw\84008845\30528977.wav	0	5	[0.2551679015, 2.0709302425, 1.6072465181, 0.1757855862, 0.1950123757, 0.5782279372]	0.255168	2.07093	1.60725	0.175786	0.195012	0.578228
800	812	jd	cy_714177180_3157549689.wav	D:\hc--document\all text\P8_medical\thesis_dataset\use_wav_raw\714177180\3157549689.wav	0	2	[0.4579359889, 1.4247810841, 1.5830646753, 0.1080772355, 0.3619642854, 0.2361365259]	0.457936	1.42478	1.58306	0.108077	0.361964	0.236137
801	86	general	cy_722171314_3339450175.wav	D:\hc--document\all text\P8_medical\thesis_dataset\use_wav_raw\722171314\3339450175.wav	0	0	[0.5035413504, 1.0901997089, 1.3930896521, 0.2311083525, 0.2676646411, 0.1836640537]	0.503541	1.0902	1.39309	0.231108	0.267665	0.183664
802	1174	wz	dx_90224427_28832700.wav	D:\hc--document\all text\P8_medical\thesis_dataset\use_wav_raw\90224427\28832700.wav	0	3	[0.901932478, 0.1174763963, 0.2831727266, 1.4852552414, 0.6151442528, 0.6823800206]	0.901932	0.117476	0.283173	1.48526	0.615144	0.68238
803	335	jd	cy_447767080_1110675843.wav	D:\hc--document\all text\P8_medical\thesis_dataset\use_wav_raw\447767080\1110675843.wav	0	2	[0.6032667756, 1.2814010382, 1.4554470778, 0.0678242445, 0.4380076528, 0.0513347387]	0.603267	1.2814	1.45545	0.0678242	0.438008	0.0513347
804	1001	rouhe	cy_719308017_3274440565.wav	D:\hc--document\all text\P8_medical\thesis_dataset\use_wav_raw\719308017\3274440565.wav	0	4	[0.8436035514, 0.0572348908, 0.2529372573, 1.4948108196, 1.1404721737, 0.337695539]	0.843604	0.0572349	0.252937	1.49481	1.14047	0.337696
805	452	general	cy_684199566_2512391174.wav	D:\hc--document\all text\P8_medical\thesis_dataset\use_wav_raw\684199566\2512391174.wav	0	0	[1.1777119637, 0.3075581491, 0.4224170446, 0.5820779204, 0.6163655519, 0.9503369331]	1.17771	0.307558	0.422417	0.582078	0.616366	0.950337
806	232	jd	cy_672196252_2254019272.wav	D:\hc--document\all text\P8_medical\thesis_dataset\use_wav_raw\672196252\2254019272.wav	0	2	[0.4115303457, 1.5431777239, 1.6480520964, 0.0800294951, 0.3804929554, 0.2190137208]	0.41153	1.54318	1.64805	0.0800295	0.380493	0.219014
807	596	rouhe	cy_721243714_3319480013.wav	D:\hc--document\all text\P8_medical\thesis_dataset\use_wav_raw\721243714\3319480013.wav	0	4	[1.29040277, 0.0172659475, 0.3150573671, 0.8037116528, 1.5247968435, 0.3047008812]	1.2904	0.0172659	0.315057	0.803712	1.5248	0.304701
808	1043	wz	cy_721508975_3325106632.wav	D:\hc--document\all text\P8_medical\thesis_dataset\use_wav_raw\721508975\3325106632.wav	0	3	[1.1667559147, 0.1600314081, 0.3078385592, 0.9676648378, 1.4516273737, 0.4289002419]	1.16676	0.160031	0.307839	0.967665	1.45163	0.4289
809	1473	rouhe	dx_88293943_26742668.wav	D:\hc--document\all text\P8_medical\thesis_dataset\use_wav_raw\88293943\26742668.wav	0	4	[0.3236206174, 1.7575548887, 1.6554025412, 0.1189727187, 0.2552599013, 0.3244245648]	0.323621	1.75755	1.6554	0.118973	0.25526	0.324425
810	1318	fn	cy_719231806_3272456704.wav	D:\hc--document\all text\P8_medical\thesis_dataset\use_wav_raw\719231806\3272456704.wav	0	1	[0.3299849629, 1.6980075836, 1.7374755144, 0.0619917251, 0.3012120426, 0.3056166768]	0.329985	1.69801	1.73748	0.0619917	0.301212	0.305617
811	360	rouhe	dx_76730433_21687464.wav	D:\hc--document\all text\P8_medical\thesis_dataset\use_wav_raw\76730433\21687464.wav	0	4	[1.0611397028, 0.0439758301, 0.3243101239, 0.7164753675, 1.3948736191, 0.1279061586]	1.06114	0.0439758	0.32431	0.716475	1.39487	0.127906
812	1250	fn	cy_677465451_2365378680.wav	D:\hc--document\all text\P8_medical\thesis_dataset\use_wav_raw\677465451\2365378680.wav	0	1	[0.3821031153, 1.695782423, 1.7635732889, 0.1032061428, 0.3808626831, 0.268217206]	0.382103	1.69578	1.76357	0.103206	0.380863	0.268217
813	571	yl	cy_721440574_3323335158.wav	D:\hc--document\all text\P8_medical\thesis_dataset\use_wav_raw\721440574\3323335158.wav	0	5	[1.0789020061, 0.2206636965, 0.5318737626, 0.2167160362, 1.2128715515, 0.384806633]	1.0789	0.220664	0.531874	0.216716	1.21287	0.384807
814	1008	fn	dx_53643371_14212563.wav	D:\hc--document\all text\P8_medical\thesis_dataset\use_wav_raw\53643371\14212563.wav	0	1	[0.376465112, 1.6930006742, 1.5943313837, 0.1296925545, 0.3378380835, 0.5074955821]	0.376465	1.693	1.59433	0.129693	0.337838	0.507496
815	569	yl	cy_718079310_3247704804.wav	D:\hc--document\all text\P8_medical\thesis_dataset\use_wav_raw\718079310\3247704804.wav	0	5	[1.2075942755, 0.5338150263, 0.2966791391, 0.7915812135, 0.5506168008, 1.5087248087]	1.20759	0.533815	0.296679	0.791581	0.550617	1.50872
816	1224	fn	dx_89741544_29553544.wav	D:\hc--document\all text\P8_medical\thesis_dataset\use_wav_raw\89741544\29553544.wav	0	1	[0.4379000962, 1.5759935379, 1.4896272421, 0.0946909115, 0.3753684461, 0.1423419714]	0.4379	1.57599	1.48963	0.0946909	0.375368	0.142342
817	1336	general	cy_712855896_3127501670.wav	D:\hc--document\all text\P8_medical\thesis_dataset\use_wav_raw\712855896\3127501670.wav	0	0	[1.2348746061, 0.1970241666, 0.3416057825, 0.5129320621, 0.8629411459, 0.6588220596]	1.23487	0.197024	0.341606	0.512932	0.862941	0.658822
818	960	wz	cy_721071284_3315802785.wav	D:\hc--document\all text\P8_medical\thesis_dataset\use_wav_raw\721071284\3315802785.wav	0	3	[1.1974172592, 0.2289044559, 0.3900326192, 0.7296386361, 0.9375186563, 1.0015366077]	1.19742	0.228904	0.390033	0.729639	0.937519	1.00154
819	1191	jd	cy_714026739_3153122785.wav	D:\hc--document\all text\P8_medical\thesis_dataset\use_wav_raw\714026739\3153122785.wav	0	2	[0.3821008205, 1.3351749182, 1.5736287832, 0.1454511583, 0.3070270121, 0.2469238341]	0.382101	1.33517	1.57363	0.145451	0.307027	0.246924
820	157	fn	cy_557880841_1575800519.wav	D:\hc--document\all text\P8_medical\thesis_dataset\use_wav_raw\557880841\1575800519.wav	0	1	[0.2396112829, 1.9889250994, 1.7439582348, 0.0546506606, 0.2927860022, 0.3273071051]	0.239611	1.98893	1.74396	0.0546507	0.292786	0.327307
821	932	rouhe	cy_607924780_1836877256.wav	D:\hc--document\all text\P8_medical\thesis_dataset\use_wav_raw\607924780\1836877256.wav	0	4	[0.2452392131, 1.9834836721, 1.6543632746, 0.1025096178, 0.2587334812, 0.3833825588]	0.245239	1.98348	1.65436	0.10251	0.258733	0.383383
822	1278	fn	cy_580880318_1696094528.wav	D:\hc--document\all text\P8_medical\thesis_dataset\use_wav_raw\580880318\1696094528.wav	0	1	[1.1037420034, 0.2341638058, 0.467277199, 0.3232733309, 1.1671186686, 0.3773962259]	1.10374	0.234164	0.467277	0.323273	1.16712	0.377396
823	696	rouhe	cy_691424808_2666859396.wav	D:\hc--document\all text\P8_medical\thesis_dataset\use_wav_raw\691424808\2666859396.wav	0	4	[1.1981729269, 0.2540323138, 0.3249757886, 0.9753496051, 1.5493695736, 0.4752159715]	1.19817	0.254032	0.324976	0.97535	1.54937	0.475216
824	1322	wz	cy_682375840_2471892320.wav	D:\hc--document\all text\P8_medical\thesis_dataset\use_wav_raw\682375840\2471892320.wav	0	3	[1.1420420408, 0.0, 0.2219102681, 1.0700935125, 1.0735791922, 0.4502662718]	1.14204	0	0.22191	1.07009	1.07358	0.450266
825	149	wz	dx_90836942_29738492.wav	D:\hc--document\all text\P8_medical\thesis_dataset\use_wav_raw\90836942\29738492.wav	0	3	[1.1749662161, 0.165431425, 0.4718720019, 0.2226599157, 1.1277730465, 0.5532290936]	1.17497	0.165431	0.471872	0.22266	1.12777	0.553229
826	945	general	cy_717817547_3240407669.wav	D:\hc--document\all text\P8_medical\thesis_dataset\use_wav_raw\717817547\3240407669.wav	0	0	[1.0308238268, 0.1920118034, 0.4931300879, 0.3797800243, 0.8852055073, 0.7509174943]	1.03082	0.192012	0.49313	0.37978	0.885206	0.750917
827	913	general	cy_683047189_2486796174.wav	D:\hc--document\all text\P8_medical\thesis_dataset\use_wav_raw\683047189\2486796174.wav	0	0	[1.2246060371, 0.2357907295, 0.170846656, 0.934694767, 0.4365757704, 1.310968399]	1.22461	0.235791	0.170847	0.934695	0.436576	1.31097
828	544	general	dx_90630549_29571594.wav	D:\hc--document\all text\P8_medical\thesis_dataset\use_wav_raw\90630549\29571594.wav	0	0	[0.5127273202, 0.9602811337, 1.3815886974, 0.1113130152, 0.2630821466, 0.2472235262]	0.512727	0.960281	1.38159	0.111313	0.263082	0.247224
829	651	rouhe	dx_84004625_30504892.wav	D:\hc--document\all text\P8_medical\thesis_dataset\use_wav_raw\84004625\30504892.wav	0	4	[1.1379789114, 0.0249829162, 0.3910154402, 0.6180840135, 1.4908510447, 0.1620716006]	1.13798	0.0249829	0.391015	0.618084	1.49085	0.162072
830	394	wz	cy_724439549_3394366773.wav	D:\hc--document\all text\P8_medical\thesis_dataset\use_wav_raw\724439549\3394366773.wav	0	3	[0.7846110463, 0.6517069936, 0.9458383322, 0.2347505093, 0.4780448973, 0.47020033]	0.784611	0.651707	0.945838	0.234751	0.478045	0.4702
831	1087	fn	cy_656561388_2096338232.wav	D:\hc--document\all text\P8_medical\thesis_dataset\use_wav_raw\656561388\2096338232.wav	0	1	[1.0193653107, 0.7454230785, 0.6503508687, 0.510718286, 0.4978370368, 1.4581156969]	1.01937	0.745423	0.650351	0.510718	0.497837	1.45812
832	1075	rouhe	cy_685674193_2543179248.wav	D:\hc--document\all text\P8_medical\thesis_dataset\use_wav_raw\685674193\2543179248.wav	0	4	[1.0368849039, 0.1761509627, 0.3265990019, 0.78182441, 1.3179398775, 0.4318599105]	1.03688	0.176151	0.326599	0.781824	1.31794	0.43186
833	817	wz	cy_677267248_2361035436.wav	D:\hc--document\all text\P8_medical\thesis_dataset\use_wav_raw\677267248\2361035436.wav	0	3	[1.0493927002, 0.0, 0.1353861094, 1.3181158304, 0.4312570989, 0.9362854362]	1.04939	0	0.135386	1.31812	0.431257	0.936285
834	246	jd	cy_722986327_3358525501.wav	D:\hc--document\all text\P8_medical\thesis_dataset\use_wav_raw\722986327\3358525501.wav	0	2	[1.1890590191, 0.0813846737, 0.4708767831, 0.1444240361, 1.521530509, 0.3296666443]	1.18906	0.0813847	0.470877	0.144424	1.52153	0.329667
835	545	rouhe	cy_677500446_2366113840.wav	D:\hc--document\all text\P8_medical\thesis_dataset\use_wav_raw\677500446\2366113840.wav	0	4	[0.8724474311, 0.0823612213, 0.2853292823, 1.2413774729, 1.4637266397, 0.2973808348]	0.872447	0.0823612	0.285329	1.24138	1.46373	0.297381
836	657	general	dx_70450772_24065717.wav	D:\hc--document\all text\P8_medical\thesis_dataset\use_wav_raw\70450772\24065717.wav	0	0	[1.2022857666, 0.2426274568, 0.2890993357, 0.5715440512, 0.3122502565, 1.178552866]	1.20229	0.242627	0.289099	0.571544	0.31225	1.17855
837	1744	wz	cy_671121391_2231689804.wav	D:\hc--document\all text\P8_medical\thesis_dataset\use_wav_raw\671121391\2231689804.wav	0	3	[1.0577073097, 0.0104373023, 0.1084990278, 1.3588041067, 0.4456214011, 0.9695367217]	1.05771	0.0104373	0.108499	1.3588	0.445621	0.969537
838	1310	yl	cy_718978094_3267341172.wav	D:\hc--document\all text\P8_medical\thesis_dataset\use_wav_raw\718978094\3267341172.wav	0	5	[1.1214135885, 0.313411504, 0.4532091618, 0.5411340594, 0.6007949114, 1.0998698473]	1.12141	0.313412	0.453209	0.541134	0.600795	1.09987
839	1420	fn	dx_91846386_31092971.wav	D:\hc--document\all text\P8_medical\thesis_dataset\use_wav_raw\91846386\31092971.wav	0	1	[0.3658764064, 1.7684441805, 1.6625300646, 0.1123095974, 0.2526005208, 0.3869927526]	0.365876	1.76844	1.66253	0.11231	0.252601	0.386993
840	1105	rouhe	cy_710882132_3090427765.wav	D:\hc--document\all text\P8_medical\thesis_dataset\use_wav_raw\710882132\3090427765.wav	0	4	[1.3198691607, 0.0, 0.3438738286, 0.3408157527, 1.4346650839, 0.2903835773]	1.31987	0	0.343874	0.340816	1.43467	0.290384
841	542	fn	cy_6419300_7239379.wav	D:\hc--document\all text\P8_medical\thesis_dataset\use_wav_raw\6419300\7239379.wav	0	1	[0.3584552109, 1.7934987545, 1.7203886509, 0.0564289242, 0.306145519, 0.2739262581]	0.358455	1.7935	1.72039	0.0564289	0.306146	0.273926
842	1582	rouhe	cy_677676371_2370003760.wav	D:\hc--document\all text\P8_medical\thesis_dataset\use_wav_raw\677676371\2370003760.wav	0	4	[1.250182271, 0.0, 0.3931591511, 0.2414040267, 1.2981991768, 0.327085346]	1.25018	0	0.393159	0.241404	1.2982	0.327085
843	676	rouhe	cy_722966414_3359264837.wav	D:\hc--document\all text\P8_medical\thesis_dataset\use_wav_raw\722966414\3359264837.wav	0	4	[1.1701384783, 0.0, 0.2904283106, 1.0853196383, 1.2396287918, 0.3163309097]	1.17014	0	0.290428	1.08532	1.23963	0.316331
844	766	rouhe	cy_691493593_2668626516.wav	D:\hc--document\all text\P8_medical\thesis_dataset\use_wav_raw\691493593\2668626516.wav	0	4	[0.9493791461, 0.082095392, 0.3075967729, 1.3075892925, 1.4725974798, 0.2723860741]	0.949379	0.0820954	0.307597	1.30759	1.4726	0.272386
845	1591	yl	dx_86880584_25356053.wav	D:\hc--document\all text\P8_medical\thesis_dataset\use_wav_raw\86880584\25356053.wav	0	5	[1.0833085775, 0.6362497211, 0.4649044871, 0.6687982082, 0.5056941509, 1.4338892698]	1.08331	0.63625	0.464904	0.668798	0.505694	1.43389
846	611	wz	cy_724084414_3384319366.wav	D:\hc--document\all text\P8_medical\thesis_dataset\use_wav_raw\724084414\3384319366.wav	0	3	[1.1454298496, 0.0, 0.0535645187, 1.3198261261, 0.527259171, 0.8020893931]	1.14543	0	0.0535645	1.31983	0.527259	0.802089
847	463	general	cy_63016432_39909871.wav	D:\hc--document\all text\P8_medical\thesis_dataset\use_wav_raw\63016432\39909871.wav	0	0	[0.6346564889, 1.1929806471, 1.4402861595, 0.0354513377, 0.4033140242, 0.0]	0.634656	1.19298	1.44029	0.0354513	0.403314	0
848	885	wz	cy_684461893_2517853128.wav	D:\hc--document\all text\P8_medical\thesis_dataset\use_wav_raw\684461893\2517853128.wav	0	3	[1.0308212042, 0.0450140238, 0.3655474782, 1.2424145937, 1.2889435291, 0.2168430537]	1.03082	0.045014	0.365547	1.24241	1.28894	0.216843
849	409	rouhe	cy_722366023_3344899243.wav	D:\hc--document\all text\P8_medical\thesis_dataset\use_wav_raw\722366023\3344899243.wav	0	4	[1.1153893471, 0.0598779023, 0.1497587413, 1.2117382288, 0.3782191277, 0.9790999889]	1.11539	0.0598779	0.149759	1.21174	0.378219	0.9791
850	890	rouhe	cy_723965704_3382240000.wav	D:\hc--document\all text\P8_medical\thesis_dataset\use_wav_raw\723965704\3382240000.wav	0	4	[0.9273898005, 0.1345353723, 0.3161946237, 1.3155684471, 1.390332818, 0.4272393286]	0.92739	0.134535	0.316195	1.31557	1.39033	0.427239
851	1770	yl	cy_671148109_2232267354.wav	D:\hc--document\all text\P8_medical\thesis_dataset\use_wav_raw\671148109\2232267354.wav	0	5	[0.8787832856, 0.8887085319, 0.6933884025, 0.5716941953, 0.3203969002, 1.6216357946]	0.878783	0.888709	0.693388	0.571694	0.320397	1.62164
852	588	jd	cy_715599538_3188268928.wav	D:\hc--document\all text\P8_medical\thesis_dataset\use_wav_raw\715599538\3188268928.wav	0	2	[0.2844564021, 1.7816256285, 1.7299503088, 0.1072154492, 0.3428979218, 0.324079752]	0.284456	1.78163	1.72995	0.107215	0.342898	0.32408
853	1350	yl	cy_692710217_2694562980.wav	D:\hc--document\all text\P8_medical\thesis_dataset\use_wav_raw\692710217\2694562980.wav	0	5	[1.2664979696, 0.2640413642, 0.3259978592, 0.6216521859, 0.5861333013, 1.0830037594]	1.2665	0.264041	0.325998	0.621652	0.586133	1.083
854	1400	fn	cy_717683465_3236998199.wav	D:\hc--document\all text\P8_medical\thesis_dataset\use_wav_raw\717683465\3236998199.wav	0	1	[0.8857281208, 0.5327115059, 0.3704974949, 1.0811436176, 0.3372115493, 1.419481039]	0.885728	0.532712	0.370497	1.08114	0.337212	1.41948
855	412	general	cy_721560301_3325468271.wav	D:\hc--document\all text\P8_medical\thesis_dataset\use_wav_raw\721560301\3325468271.wav	0	0	[1.2521696091, 0.5382138491, 0.3727876246, 0.6661311388, 0.7691169381, 1.3163201809]	1.25217	0.538214	0.372788	0.666131	0.769117	1.31632
856	522	wz	dx_78069768_22210948.wav	D:\hc--document\all text\P8_medical\thesis_dataset\use_wav_raw\78069768\22210948.wav	0	3	[1.1194784641, 0.0, 0.1236778349, 1.2359452248, 0.4391832948, 0.8621926308]	1.11948	0	0.123678	1.23595	0.439183	0.862193
857	1388	rouhe	dx_85798246_24619918.wav	D:\hc--document\all text\P8_medical\thesis_dataset\use_wav_raw\85798246\24619918.wav	0	4	[1.16426754, 0.064416185, 0.3291046619, 0.5915802121, 1.3155499697, 0.1449004114]	1.16427	0.0644162	0.329105	0.59158	1.31555	0.1449
858	985	fn	cy_697586250_2797394066.wav	D:\hc--document\all text\P8_medical\thesis_dataset\use_wav_raw\697586250\2797394066.wav	0	1	[0.2222631574, 1.9284853935, 1.7188131809, 0.088670224, 0.159543097, 0.5276711583]	0.222263	1.92849	1.71881	0.0886702	0.159543	0.527671
859	647	general	cy_691938094_2677614692.wav	D:\hc--document\all text\P8_medical\thesis_dataset\use_wav_raw\691938094\2677614692.wav	0	0	[1.1386390924, 0.2688013911, 0.51047647, 0.3409235775, 0.7317000628, 0.7078728676]	1.13864	0.268801	0.510476	0.340924	0.7317	0.707873
860	1019	jd	cy_705889074_2986368030.wav	D:\hc--document\all text\P8_medical\thesis_dataset\use_wav_raw\705889074\2986368030.wav	0	2	[0.2112807333, 1.8961740732, 1.7188680172, 0.0838798061, 0.2256155014, 0.4618928134]	0.211281	1.89617	1.71887	0.0838798	0.225616	0.461893
861	1289	yl	cy_655998896_2095334825.wav	D:\hc--document\all text\P8_medical\thesis_dataset\use_wav_raw\655998896\2095334825.wav	0	5	[1.2799344063, 0.1133359075, 0.2486894131, 0.7393370867, 0.509055078, 1.1863335371]	1.27993	0.113336	0.248689	0.739337	0.509055	1.18633
862	1597	general	cy_672875983_2268321228.wav	D:\hc--document\all text\P8_medical\thesis_dataset\use_wav_raw\672875983\2268321228.wav	0	0	[1.2484461069, 0.154063046, 0.2071476728, 0.8894748092, 0.5990447998, 1.1496794224]	1.24845	0.154063	0.207148	0.889475	0.599045	1.14968
863	988	general	dx_92494019_31958030.wav	D:\hc--document\all text\P8_medical\thesis_dataset\use_wav_raw\92494019\31958030.wav	0	0	[1.0732672215, 0.3491376638, 0.5282238126, 0.2738793492, 0.5623360276, 0.9237674475]	1.07327	0.349138	0.528224	0.273879	0.562336	0.923767
864	1341	general	dx_91310563_30399581.wav	D:\hc--document\all text\P8_medical\thesis_dataset\use_wav_raw\91310563\30399581.wav	0	0	[1.1648535728, 0.2176494747, 0.2653026879, 0.9561735392, 0.6026962996, 1.0505282879]	1.16485	0.217649	0.265303	0.956174	0.602696	1.05053
865	1193	jd	cy_719530962_3279323028.wav	D:\hc--document\all text\P8_medical\thesis_dataset\use_wav_raw\719530962\3279323028.wav	0	2	[0.6426715255, 0.7397307158, 1.2220729589, 0.234830454, 0.3990298808, 0.1562652886]	0.642672	0.739731	1.22207	0.23483	0.39903	0.156265
866	1425	fn	cy_713759775_3148956116.wav	D:\hc--document\all text\P8_medical\thesis_dataset\use_wav_raw\713759775\3148956116.wav	0	1	[0.2816294134, 1.8736009598, 1.646463871, 0.0631081983, 0.1149795502, 0.5722129941]	0.281629	1.8736	1.64646	0.0631082	0.11498	0.572213
867	1200	fn	cy_637289760_1994368862.wav	D:\hc--document\all text\P8_medical\thesis_dataset\use_wav_raw\637289760\1994368862.wav	0	1	[0.2826331854, 1.8005828857, 1.5931681395, 0.1099223271, 0.3162342012, 0.3621116579]	0.282633	1.80058	1.59317	0.109922	0.316234	0.362112
868	1155	rouhe	cy_691354151_2665381672.wav	D:\hc--document\all text\P8_medical\thesis_dataset\use_wav_raw\691354151\2665381672.wav	0	4	[1.3043422699, 0.0, 0.387213856, 0.1653947383, 1.3097765446, 0.3012285233]	1.30434	0	0.387214	0.165395	1.30978	0.301229
869	818	yl	cy_688050527_2595115260.wav	D:\hc--document\all text\P8_medical\thesis_dataset\use_wav_raw\688050527\2595115260.wav	0	5	[0.9328834414, 0.8495419025, 0.6615570188, 0.5383405685, 0.4129190147, 1.5617851019]	0.932883	0.849542	0.661557	0.538341	0.412919	1.56179
870	1707	jd	cy_601338600_1803206129.wav	D:\hc--document\all text\P8_medical\thesis_dataset\use_wav_raw\601338600\1803206129.wav	0	2	[1.0976498127, 0.1485601813, 0.5167467594, 0.2681244016, 0.7910773158, 0.6185041666]	1.09765	0.14856	0.516747	0.268124	0.791077	0.618504
871	840	general	cy_694664407_2735587016.wav	D:\hc--document\all text\P8_medical\thesis_dataset\use_wav_raw\694664407\2735587016.wav	0	0	[0.6948957443, 0.7469285727, 1.1404464245, 0.1778326929, 0.4185273647, 0.3438821733]	0.694896	0.746929	1.14045	0.177833	0.418527	0.343882
872	1732	jd	cy_669332893_2195129488.wav	D:\hc--document\all text\P8_medical\thesis_dataset\use_wav_raw\669332893\2195129488.wav	0	2	[0.2312276959, 2.0817041397, 1.6684705019, 0.1194439009, 0.2473498583, 0.3947461545]	0.231228	2.0817	1.66847	0.119444	0.24735	0.394746
873	912	jd	cy_645930940_2038735982.wav	D:\hc--document\all text\P8_medical\thesis_dataset\use_wav_raw\645930940\2038735982.wav	0	2	[0.7360152006, 0.9991413355, 1.1478916407, 0.2536995411, 0.4702314138, 0.5723685026]	0.736015	0.999141	1.14789	0.2537	0.470231	0.572369
874	1696	general	cy_691217368_2662624804.wav	D:\hc--document\all text\P8_medical\thesis_dataset\use_wav_raw\691217368\2662624804.wav	0	0	[0.9585613012, 0.0057341289, 0.1691013277, 1.2480893135, 1.1094894409, 0.4241162241]	0.958561	0.00573413	0.169101	1.24809	1.10949	0.424116
875	902	rouhe	cy_696960882_2783739582.wav	D:\hc--document\all text\P8_medical\thesis_dataset\use_wav_raw\696960882\2783739582.wav	0	4	[1.2474058867, 0.0771340132, 0.2953994572, 0.4155075252, 1.4883295298, 0.3111411333]	1.24741	0.077134	0.295399	0.415508	1.48833	0.311141
876	181	general	cy_679158590_2401981330.wav	D:\hc--document\all text\P8_medical\thesis_dataset\use_wav_raw\679158590\2401981330.wav	0	0	[0.9476503134, 0.0028335266, 0.2637499273, 1.4144216776, 0.9856655002, 0.3010168672]	0.94765	0.00283353	0.26375	1.41442	0.985666	0.301017
877	1415	yl	cy_675903576_2332351442.wav	D:\hc--document\all text\P8_medical\thesis_dataset\use_wav_raw\675903576\2332351442.wav	0	5	[0.3369832039, 1.7336171865, 1.6165932417, 0.1211497188, 0.3420128524, 0.5212990642]	0.336983	1.73362	1.61659	0.12115	0.342013	0.521299
878	856	yl	dx_90755745_29906661.wav	D:\hc--document\all text\P8_medical\thesis_dataset\use_wav_raw\90755745\29906661.wav	0	5	[1.094660759, 0.2230771929, 0.5178330541, 0.3243372142, 0.3852953017, 0.9010742307]	1.09466	0.223077	0.517833	0.324337	0.385295	0.901074
879	1022	yl	cy_608543091_1839694880.wav	D:\hc--document\all text\P8_medical\thesis_dataset\use_wav_raw\608543091\1839694880.wav	0	5	[1.2485823631, 0.2588430643, 0.2830477059, 0.7474028468, 0.6205487251, 1.2630544901]	1.24858	0.258843	0.283048	0.747403	0.620549	1.26305
880	1091	general	cy_560038955_1586180450.wav	D:\hc--document\all text\P8_medical\thesis_dataset\use_wav_raw\560038955\1586180450.wav	0	0	[1.0337812901, 0.26497823, 0.6582842469, 0.1815981865, 1.1731854677, 0.0519809872]	1.03378	0.264978	0.658284	0.181598	1.17319	0.051981
881	1293	general	cy_715246471_3179758832.wav	D:\hc--document\all text\P8_medical\thesis_dataset\use_wav_raw\715246471\3179758832.wav	0	0	[0.963640213, 0.0, 0.2989493012, 1.2953653336, 1.0178383589, 0.38110286]	0.96364	0	0.298949	1.29537	1.01784	0.381103
882	77	general	cy_716281091_3203051424.wav	D:\hc--document\all text\P8_medical\thesis_dataset\use_wav_raw\716281091\3203051424.wav	0	0	[1.2051407099, 0.1903002709, 0.4306460321, 0.1307605207, 1.2707844973, 0.5145622492]	1.20514	0.1903	0.430646	0.130761	1.27078	0.514562
883	1766	general	cy_723706440_3376096979.wav	D:\hc--document\all text\P8_medical\thesis_dataset\use_wav_raw\723706440\3376096979.wav	0	0	[1.2284632921, 0.0975399762, 0.3798283935, 0.5543187857, 0.2359916568, 0.9779564738]	1.22846	0.09754	0.379828	0.554319	0.235992	0.977956
884	979	jd	cy_659577790_2113120898.wav	D:\hc--document\all text\P8_medical\thesis_dataset\use_wav_raw\659577790\2113120898.wav	0	2	[0.2815015316, 1.7594674826, 1.684925437, 0.0539649986, 0.3066150844, 0.2353259623]	0.281502	1.75947	1.68493	0.053965	0.306615	0.235326
885	1103	general	dx_15765676_7824283.wav	D:\hc--document\all text\P8_medical\thesis_dataset\use_wav_raw\15765676\7824283.wav	0	0	[1.3131357431, 0.3183320463, 0.1957962066, 0.8115470409, 0.4359850585, 1.3313683271]	1.31314	0.318332	0.195796	0.811547	0.435985	1.33137
886	1613	wz	cy_684523883_2519550308.wav	D:\hc--document\all text\P8_medical\thesis_dataset\use_wav_raw\684523883\2519550308.wav	0	3	[1.0855053663, 0.0, 0.1790288091, 1.3427337408, 0.4695112705, 0.8855279684]	1.08551	0	0.179029	1.34273	0.469511	0.885528
887	1023	yl	cy_716014074_3196959693.wav	D:\hc--document\all text\P8_medical\thesis_dataset\use_wav_raw\716014074\3196959693.wav	0	5	[1.0319145918, 0.0828528106, 0.3119652569, 1.2489718199, 0.8639279008, 0.6231278181]	1.03191	0.0828528	0.311965	1.24897	0.863928	0.623128
888	1557	rouhe	cy_692803593_2696604680.wav	D:\hc--document\all text\P8_medical\thesis_dataset\use_wav_raw\692803593\2696604680.wav	0	4	[1.1423152685, 0.1099910811, 0.2782783806, 0.9893652201, 1.2822185755, 0.2210110277]	1.14232	0.109991	0.278278	0.989365	1.28222	0.221011
889	1185	jd	dx_84966633_24288026.wav	D:\hc--document\all text\P8_medical\thesis_dataset\use_wav_raw\84966633\24288026.wav	0	2	[0.2826269865, 1.8871482611, 1.6398565769, 0.1176261082, 0.1252297014, 0.5395463705]	0.282627	1.88715	1.63986	0.117626	0.12523	0.539546
890	356	rouhe	cy_718439415_3255414676.wav	D:\hc--document\all text\P8_medical\thesis_dataset\use_wav_raw\718439415\3255414676.wav	0	4	[1.1758753061, 0.1657043844, 0.5007555485, 0.3937102258, 0.6248067021, 1.0541136265]	1.17588	0.165704	0.500756	0.39371	0.624807	1.05411
891	1154	general	dx_89739139_29540090.wav	D:\hc--document\all text\P8_medical\thesis_dataset\use_wav_raw\89739139\29540090.wav	0	0	[1.0818175077, 0.0437183529, 0.2961160839, 1.208080411, 0.7219775319, 0.5899501443]	1.08182	0.0437184	0.296116	1.20808	0.721978	0.58995
892	99	general	cy_681790729_2459553700.wav	D:\hc--document\all text\P8_medical\thesis_dataset\use_wav_raw\681790729\2459553700.wav	0	0	[0.7941073775, 1.0784928799, 1.0798566341, 0.2672658563, 0.4599165618, 0.7928555608]	0.794107	1.07849	1.07986	0.267266	0.459917	0.792856
893	166	fn	cy_684635713_2521729094.wav	D:\hc--document\all text\P8_medical\thesis_dataset\use_wav_raw\684635713\2521729094.wav	0	1	[0.2633261979, 1.7773760557, 1.7159873247, 0.113145031, 0.291295439, 0.3415027857]	0.263326	1.77738	1.71599	0.113145	0.291295	0.341503
894	864	yl	cy_718184445_3248880750.wav	D:\hc--document\all text\P8_medical\thesis_dataset\use_wav_raw\718184445\3248880750.wav	0	5	[1.0796812773, 0.7503896356, 0.4906462133, 0.6038079262, 0.1990389377, 1.5957078934]	1.07968	0.75039	0.490646	0.603808	0.199039	1.59571
895	87	wz	cy_635434981_1984377083.wav	D:\hc--document\all text\P8_medical\thesis_dataset\use_wav_raw\635434981\1984377083.wav	0	3	[1.1534867287, 0.0723337084, 0.2683436275, 1.1827602386, 0.3710209131, 0.8991531134]	1.15349	0.0723337	0.268344	1.18276	0.371021	0.899153
896	881	general	dx_57180072_15345093.wav	D:\hc--document\all text\P8_medical\thesis_dataset\use_wav_raw\57180072\15345093.wav	0	0	[1.1360237598, 0.2254905254, 0.4543740153, 0.3805449605, 0.4883515239, 0.9947993755]	1.13602	0.225491	0.454374	0.380545	0.488352	0.994799
897	129	jd	cy_675563525_2325098192.wav	D:\hc--document\all text\P8_medical\thesis_dataset\use_wav_raw\675563525\2325098192.wav	0	2	[0.4150220752, 1.6630694866, 1.7075984478, 0.0696322918, 0.3316396475, 0.2967003882]	0.415022	1.66307	1.7076	0.0696323	0.33164	0.2967
898	1640	yl	cy_700907350_2871530972.wav	D:\hc--document\all text\P8_medical\thesis_dataset\use_wav_raw\700907350\2871530972.wav	0	5	[0.9867190123, 0.7973558903, 0.4529736638, 0.7449133396, 0.358315438, 1.6518609524]	0.986719	0.797356	0.452974	0.744913	0.358315	1.65186
899	527	general	cy_446396010_1106531280.wav	D:\hc--document\all text\P8_medical\thesis_dataset\use_wav_raw\446396010\1106531280.wav	0	0	[1.3031959534, 0.0, 0.3656460345, 0.7181556821, 1.019661665, 0.6130725741]	1.3032	0	0.365646	0.718156	1.01966	0.613073
900	1236	wz	cy_685177183_2532739778.wav	D:\hc--document\all text\P8_medical\thesis_dataset\use_wav_raw\685177183\2532739778.wav	0	3	[1.3499470949, 0.0, 0.3053331971, 0.3946837783, 1.3818838596, 0.4007736444]	1.34995	0	0.305333	0.394684	1.38188	0.400774
901	1579	yl	cy_672845442_2267590134.wav	D:\hc--document\all text\P8_medical\thesis_dataset\use_wav_raw\672845442\2267590134.wav	0	5	[0.9465031624, 0.5188273787, 0.6081989408, 0.2110158652, 0.3746213317, 1.1794023514]	0.946503	0.518827	0.608199	0.211016	0.374621	1.1794
902	163	yl	cy_669511298_2198321012.wav	D:\hc--document\all text\P8_medical\thesis_dataset\use_wav_raw\669511298\2198321012.wav	0	5	[1.2616348267, 0.0, 0.4112852216, 0.1923640966, 1.0249093771, 0.3556126952]	1.26163	0	0.411285	0.192364	1.02491	0.355613
903	652	fn	dx_92016601_30987565.wav	D:\hc--document\all text\P8_medical\thesis_dataset\use_wav_raw\92016601\30987565.wav	0	1	[0.4669037461, 1.5624250174, 1.5031331778, 0.1019280031, 0.3357493579, 0.5127430558]	0.466904	1.56243	1.50313	0.101928	0.335749	0.512743
904	1303	yl	cy_699288486_2835332244.wav	D:\hc--document\all text\P8_medical\thesis_dataset\use_wav_raw\699288486\2835332244.wav	0	5	[0.2506243885, 1.9095386267, 1.687443614, 0.1352270544, 0.2360986024, 0.4246430099]	0.250624	1.90954	1.68744	0.135227	0.236099	0.424643
905	1674	jd	dx_90393856_29397056.wav	D:\hc--document\all text\P8_medical\thesis_dataset\use_wav_raw\90393856\29397056.wav	0	2	[0.2558246851, 2.0100462437, 1.6576913595, 0.1402869821, 0.1976540536, 0.4858564138]	0.255825	2.01005	1.65769	0.140287	0.197654	0.485856
906	1040	jd	cy_193270153_299686685.wav	D:\hc--document\all text\P8_medical\thesis_dataset\use_wav_raw\193270153\299686685.wav	0	2	[0.2908045053, 1.9453144073, 1.6350979805, 0.0360933244, 0.2156072855, 0.3387695849]	0.290805	1.94531	1.6351	0.0360933	0.215607	0.33877
907	1690	jd	cy_598515287_1788523328.wav	D:\hc--document\all text\P8_medical\thesis_dataset\use_wav_raw\598515287\1788523328.wav	0	2	[0.2167987823, 1.9001073837, 1.6592353582, 0.1163049564, 0.1286476403, 0.4691455662]	0.216799	1.90011	1.65924	0.116305	0.128648	0.469146
908	1285	yl	cy_553478597_1554599531.wav	D:\hc--document\all text\P8_medical\thesis_dataset\use_wav_raw\553478597\1554599531.wav	0	5	[1.1154074669, 0.019884361, 0.1714131832, 1.1705970764, 0.2817982435, 1.0151642561]	1.11541	0.0198844	0.171413	1.1706	0.281798	1.01516
909	1680	general	cy_717951723_3243164631.wav	D:\hc--document\all text\P8_medical\thesis_dataset\use_wav_raw\717951723\3243164631.wav	0	0	[1.2794874907, 0.2026432902, 0.2865951955, 0.4790690243, 0.6809399724, 0.9100715518]	1.27949	0.202643	0.286595	0.479069	0.68094	0.910072
910	134	fn	cy_669536339_2199026672.wav	D:\hc--document\all text\P8_medical\thesis_dataset\use_wav_raw\669536339\2199026672.wav	0	1	[0.3171674907, 1.9354592562, 1.7221957445, 0.0822331235, 0.3083511293, 0.3361714184]	0.317167	1.93546	1.7222	0.0822331	0.308351	0.336171
911	613	yl	cy_652913663_2076281012.wav	D:\hc--document\all text\P8_medical\thesis_dataset\use_wav_raw\652913663\2076281012.wav	0	5	[0.1957763433, 1.9417047501, 1.7058159113, 0.1523535699, 0.2445434183, 0.5272641778]	0.195776	1.9417	1.70582	0.152354	0.244543	0.527264
912	1628	wz	dx_90844803_29775458.wav	D:\hc--document\all text\P8_medical\thesis_dataset\use_wav_raw\90844803\29775458.wav	0	3	[0.9725654721, 0.0024576224, 0.3678057194, 1.1471852064, 0.9935410023, 0.4427033961]	0.972565	0.00245762	0.367806	1.14719	0.993541	0.442703
913	315	yl	cy_715669668_3189300757.wav	D:\hc--document\all text\P8_medical\thesis_dataset\use_wav_raw\715669668\3189300757.wav	0	5	[0.9738704562, 0.7758399248, 0.4809911847, 0.711400032, 0.1083406806, 1.7064318657]	0.97387	0.77584	0.480991	0.7114	0.108341	1.70643
914	1585	rouhe	cy_695817824_2760573392.wav	D:\hc--document\all text\P8_medical\thesis_dataset\use_wav_raw\695817824\2760573392.wav	0	4	[0.9542104602, 0.0912122354, 0.230913192, 1.4792999029, 0.82061553, 0.5339511633]	0.95421	0.0912122	0.230913	1.4793	0.820616	0.533951
915	1282	jd	cy_606470572_1829494937.wav	D:\hc--document\all text\P8_medical\thesis_dataset\use_wav_raw\606470572\1829494937.wav	0	2	[0.8679642081, 0.7747848034, 0.9377798438, 0.2335500866, 0.32485044, 0.5181765556]	0.867964	0.774785	0.93778	0.23355	0.32485	0.518177
916	347	jd	dx_90449302_29047841.wav	D:\hc--document\all text\P8_medical\thesis_dataset\use_wav_raw\90449302\29047841.wav	0	2	[1.1375312805, 0.0128440587, 0.4600490928, 0.2370235324, 1.3443044424, 0.3790721297]	1.13753	0.0128441	0.460049	0.237024	1.3443	0.379072
917	1190	wz	cy_672638493_2264897182.wav	D:\hc--document\all text\P8_medical\thesis_dataset\use_wav_raw\672638493\2264897182.wav	0	3	[0.1660147011, 2.0115251541, 1.733006835, 0.1457401514, 0.2016910315, 0.5030254722]	0.166015	2.01153	1.73301	0.14574	0.201691	0.503025
918	1487	yl	cy_442168471_1090242051.wav	D:\hc--document\all text\P8_medical\thesis_dataset\use_wav_raw\442168471\1090242051.wav	0	5	[0.2133559883, 1.9966362715, 1.7172271013, 0.0573149621, 0.2580657601, 0.4198238254]	0.213356	1.99664	1.71723	0.057315	0.258066	0.419824
919	547	general	cy_720317454_3297852454.wav	D:\hc--document\all text\P8_medical\thesis_dataset\use_wav_raw\720317454\3297852454.wav	0	0	[1.0383501053, 0.0556702241, 0.176864326, 1.377977252, 0.3606961966, 0.8907282352]	1.03835	0.0556702	0.176864	1.37798	0.360696	0.890728
920	170	fn	cy_560840625_1591714658.wav	D:\hc--document\all text\P8_medical\thesis_dataset\use_wav_raw\560840625\1591714658.wav	0	1	[1.06498909, 0.816755116, 0.7483357787, 0.4240957499, 0.6694930196, 1.1417039633]	1.06499	0.816755	0.748336	0.424096	0.669493	1.1417
921	617	general	cy_710025297_3073873369.wav	D:\hc--document\all text\P8_medical\thesis_dataset\use_wav_raw\710025297\3073873369.wav	0	0	[1.199072361, 0.0125144534, 0.3950076699, 0.2725144625, 1.2550895214, 0.3127683401]	1.19907	0.0125145	0.395008	0.272514	1.25509	0.312768
922	1041	fn	cy_572521159_1651013378.wav	D:\hc--document\all text\P8_medical\thesis_dataset\use_wav_raw\572521159\1651013378.wav	0	1	[0.1636160314, 2.1146829128, 1.7545821667, 0.0673428699, 0.168469131, 0.5254513621]	0.163616	2.11468	1.75458	0.0673429	0.168469	0.525451
923	100	rouhe	cy_706005380_2989255160.wav	D:\hc--document\all text\P8_medical\thesis_dataset\use_wav_raw\706005380\2989255160.wav	0	4	[1.153198719, 0.2085018009, 0.3474789858, 0.6036299467, 1.4954175949, 0.2203751206]	1.1532	0.208502	0.347479	0.60363	1.49542	0.220375
924	606	yl	cy_714494712_3163516691.wav	D:\hc--document\all text\P8_medical\thesis_dataset\use_wav_raw\714494712\3163516691.wav	0	5	[1.0986964703, 0.1874675155, 0.513135612, 0.5272679925, 0.3488957882, 0.9580151439]	1.0987	0.187468	0.513136	0.527268	0.348896	0.958015
925	388	jd	cy_700900462_2871337540.wav	D:\hc--document\all text\P8_medical\thesis_dataset\use_wav_raw\700900462\2871337540.wav	0	2	[0.2314475924, 1.9525375366, 1.6992590427, 0.1024527028, 0.2422247529, 0.5094017982]	0.231448	1.95254	1.69926	0.102453	0.242225	0.509402
926	998	wz	dx_91384384_30426799.wav	D:\hc--document\all text\P8_medical\thesis_dataset\use_wav_raw\91384384\30426799.wav	0	3	[0.8439270258, 0.0992839485, 0.2821575105, 1.4067829847, 1.2912824154, 0.3171111643]	0.843927	0.0992839	0.282158	1.40678	1.29128	0.317111
927	440	general	cy_669066760_2189248246.wav	D:\hc--document\all text\P8_medical\thesis_dataset\use_wav_raw\669066760\2189248246.wav	0	0	[0.5393744707, 1.6757932901, 1.4992285967, 0.1794608682, 0.3158268929, 0.3748187125]	0.539374	1.67579	1.49923	0.179461	0.315827	0.374819
928	1561	wz	cy_556656288_1570488704.wav	D:\hc--document\all text\P8_medical\thesis_dataset\use_wav_raw\556656288\1570488704.wav	0	3	[1.0001538992, 0.1066691354, 0.2365923822, 1.4648811817, 0.6684598923, 0.6892054081]	1.00015	0.106669	0.236592	1.46488	0.66846	0.689205
929	1774	jd	dx_91311513_30402659.wav	D:\hc--document\all text\P8_medical\thesis_dataset\use_wav_raw\91311513\30402659.wav	0	2	[0.2422398925, 1.9966362715, 1.7397378683, 0.1286601424, 0.2255161256, 0.4596715271]	0.24224	1.99664	1.73974	0.12866	0.225516	0.459672
930	1099	wz	dx_90411229_29490321.wav	D:\hc--document\all text\P8_medical\thesis_dataset\use_wav_raw\90411229\29490321.wav	0	3	[0.9256181121, 0.0392349362, 0.3017069399, 1.4032609463, 0.8718968034, 0.7045753002]	0.925618	0.0392349	0.301707	1.40326	0.871897	0.704575
931	253	fn	cy_663203910_2133948161.wav	D:\hc--document\all text\P8_medical\thesis_dataset\use_wav_raw\663203910\2133948161.wav	0	1	[0.6297152638, 0.7150891423, 1.2445838451, 0.1159346849, 0.6071584225, 0.0]	0.629715	0.715089	1.24458	0.115935	0.607158	0
932	966	general	cy_648543158_2053885370.wav	D:\hc--document\all text\P8_medical\thesis_dataset\use_wav_raw\648543158\2053885370.wav	0	0	[1.2334680557, 0.2388590425, 0.1577019542, 1.0170662403, 0.3392969668, 1.2713105679]	1.23347	0.238859	0.157702	1.01707	0.339297	1.27131
933	1092	fn	cy_682715832_2479194700.wav	D:\hc--document\all text\P8_medical\thesis_dataset\use_wav_raw\682715832\2479194700.wav	0	1	[1.3148113489, 0.1555403173, 0.3233315349, 0.7249014378, 0.6664172411, 1.1139597893]	1.31481	0.15554	0.323332	0.724901	0.666417	1.11396
934	1711	yl	cy_716159041_3202659493.wav	D:\hc--document\all text\P8_medical\thesis_dataset\use_wav_raw\716159041\3202659493.wav	0	5	[0.2621524036, 1.8902214766, 1.6339913607, 0.0978934765, 0.4760557115, 0.3483560383]	0.262152	1.89022	1.63399	0.0978935	0.476056	0.348356
935	889	jd	cy_724494048_3395839221.wav	D:\hc--document\all text\P8_medical\thesis_dataset\use_wav_raw\724494048\3395839221.wav	0	2	[0.799449861, 0.4017164111, 0.8978036046, 0.205910638, 0.8339425325, 0.1820547283]	0.79945	0.401716	0.897804	0.205911	0.833943	0.182055
936	682	yl	cy_717942063_3242590408.wav	D:\hc--document\all text\P8_medical\thesis_dataset\use_wav_raw\717942063\3242590408.wav	0	5	[1.0999982357, 0.3794308007, 0.4678385854, 0.4719970524, 0.3185231984, 1.3638781309]	1.1	0.379431	0.467839	0.471997	0.318523	1.36388
937	1363	wz	dx_88114004_27821088.wav	D:\hc--document\all text\P8_medical\thesis_dataset\use_wav_raw\88114004\27821088.wav	0	3	[1.2567597628, 0.1519414783, 0.2993452251, 0.7840112448, 1.3480895758, 0.4654650688]	1.25676	0.151941	0.299345	0.784011	1.34809	0.465465
938	916	general	dx_90822978_30245816.wav	D:\hc--document\all text\P8_medical\thesis_dataset\use_wav_raw\90822978\30245816.wav	0	0	[1.042086482, 0.069136247, 0.3469382524, 0.8248235583, 1.256819129, 0.1443360299]	1.04209	0.0691362	0.346938	0.824824	1.25682	0.144336
939	121	general	cy_668374083_2175125700.wav	D:\hc--document\all text\P8_medical\thesis_dataset\use_wav_raw\668374083\2175125700.wav	0	0	[1.2939469814, 0.2120018303, 0.1937728971, 0.8587090969, 0.480527699, 1.1651383638]	1.29395	0.212002	0.193773	0.858709	0.480528	1.16514
940	1618	jd	cy_589476250_1742760860.wav	D:\hc--document\all text\P8_medical\thesis_dataset\use_wav_raw\589476250\1742760860.wav	0	2	[1.1500762701, 0.2482436895, 0.403961271, 0.3584520519, 0.5076325536, 0.9378029108]	1.15008	0.248244	0.403961	0.358452	0.507633	0.937803
941	703	wz	dx_92396670_32108277.wav	D:\hc--document\all text\P8_medical\thesis_dataset\use_wav_raw\92396670\32108277.wav	0	3	[1.026894331, 0.018122863, 0.1389166862, 1.3252414465, 0.5608789921, 0.8208345771]	1.02689	0.0181229	0.138917	1.32524	0.560879	0.820835
942	961	jd	cy_697051566_2785721440.wav	D:\hc--document\all text\P8_medical\thesis_dataset\use_wav_raw\697051566\2785721440.wav	0	2	[1.1417905092, 0.0885337964, 0.4227710664, 0.3912200928, 1.5486800671, 0.2440959364]	1.14179	0.0885338	0.422771	0.39122	1.54868	0.244096
943	819	jd	cy_672911549_2269006946.wav	D:\hc--document\all text\P8_medical\thesis_dataset\use_wav_raw\672911549\2269006946.wav	0	2	[0.4545484185, 1.428732276, 1.534943223, 0.1235445291, 0.3289778531, 0.1625712961]	0.454548	1.42873	1.53494	0.123545	0.328978	0.162571
944	1251	jd	cy_641193283_2015177948.wav	D:\hc--document\all text\P8_medical\thesis_dataset\use_wav_raw\641193283\2015177948.wav	0	2	[0.3810459971, 1.5517545938, 1.5491901636, 0.1475284696, 0.2354442775, 0.5157573223]	0.381046	1.55175	1.54919	0.147528	0.235444	0.515757
945	468	wz	cy_714375975_3160162858.wav	D:\hc--document\all text\P8_medical\thesis_dataset\use_wav_raw\714375975\3160162858.wav	0	3	[0.9539654255, 0.1467699707, 0.269589752, 1.2909739017, 1.3043413162, 0.294173032]	0.953965	0.14677	0.26959	1.29097	1.30434	0.294173
946	187	yl	cy_688208989_2598624774.wav	D:\hc--document\all text\P8_medical\thesis_dataset\use_wav_raw\688208989\2598624774.wav	0	5	[1.123545289, 0.5077041388, 0.5680423975, 0.4926632047, 0.7008464932, 1.2691303492]	1.12355	0.507704	0.568042	0.492663	0.700846	1.26913
947	1611	jd	cy_629694415_1953185162.wav	D:\hc--document\all text\P8_medical\thesis_dataset\use_wav_raw\629694415\1953185162.wav	0	2	[0.2896697819, 1.8992767334, 1.6882058382, 0.0599874146, 0.2129902393, 0.3901326954]	0.28967	1.89928	1.68821	0.0599874	0.21299	0.390133
948	364	jd	cy_668100899_2169556442.wav	D:\hc--document\all text\P8_medical\thesis_dataset\use_wav_raw\668100899\2169556442.wav	0	2	[0.5546836257, 1.0133178234, 1.4042426348, 0.2130119652, 0.3253144324, 0.0841087177]	0.554684	1.01332	1.40424	0.213012	0.325314	0.0841087
949	1546	jd	dx_89683997_29261545.wav	D:\hc--document\all text\P8_medical\thesis_dataset\use_wav_raw\89683997\29261545.wav	0	2	[0.2037623674, 1.9354509115, 1.7599358559, 0.1559250057, 0.2127420902, 0.5439642072]	0.203762	1.93545	1.75994	0.155925	0.212742	0.543964
950	639	rouhe	cy_720244508_3295959659.wav	D:\hc--document\all text\P8_medical\thesis_dataset\use_wav_raw\720244508\3295959659.wav	0	4	[0.9611497521, 0.1339575499, 0.2557422221, 1.3924540281, 1.3880021572, 0.3428356051]	0.96115	0.133958	0.255742	1.39245	1.388	0.342836
951	391	general	cy_445213905_1101363489.wav	D:\hc--document\all text\P8_medical\thesis_dataset\use_wav_raw\445213905\1101363489.wav	0	0	[0.6692398787, 0.9465270638, 1.2447001934, 0.2205265909, 0.209437862, 0.4721395671]	0.66924	0.946527	1.2447	0.220527	0.209438	0.47214
952	261	wz	cy_719961209_3290513939.wav	D:\hc--document\all text\P8_medical\thesis_dataset\use_wav_raw\719961209\3290513939.wav	0	3	[0.8797736168, 0.0467883199, 0.1864240021, 1.4921326637, 1.1689244509, 0.2966370881]	0.879774	0.0467883	0.186424	1.49213	1.16892	0.296637
953	803	jd	cy_448785936_1114488005.wav	D:\hc--document\all text\P8_medical\thesis_dataset\use_wav_raw\448785936\1114488005.wav	0	2	[0.3893761337, 1.5248152018, 1.5176912546, 0.0932383984, 0.2337353826, 0.3488042951]	0.389376	1.52482	1.51769	0.0932384	0.233735	0.348804
954	599	rouhe	cy_680948931_2441884118.wav	D:\hc--document\all text\P8_medical\thesis_dataset\use_wav_raw\680948931\2441884118.wav	0	4	[1.1053036451, 0.2563077509, 0.6187303662, 0.321585238, 0.6166067123, 0.9201847315]	1.1053	0.256308	0.61873	0.321585	0.616607	0.920185
955	88	fn	cy_724462807_3394431946.wav	D:\hc--document\all text\P8_medical\thesis_dataset\use_wav_raw\724462807\3394431946.wav	0	1	[0.2672515213, 1.9058094025, 1.6985864639, 0.0935399085, 0.2379916161, 0.3819017708]	0.267252	1.90581	1.69859	0.0935399	0.237992	0.381902
956	1519	rouhe	cy_716771613_3215474659.wav	D:\hc--document\all text\P8_medical\thesis_dataset\use_wav_raw\716771613\3215474659.wav	0	4	[1.1548393965, 0.2262527496, 0.2712297142, 0.9621252418, 0.5422785282, 1.1414415836]	1.15484	0.226253	0.27123	0.962125	0.542279	1.14144
957	974	jd	dx_90435665_29619099.wav	D:\hc--document\all text\P8_medical\thesis_dataset\use_wav_raw\90435665\29619099.wav	0	2	[0.2826429605, 1.9484119415, 1.6676764488, 0.1081058532, 0.2573774457, 0.3913417161]	0.282643	1.94841	1.66768	0.108106	0.257377	0.391342
958	1239	general	cy_674019182_2292544488.wav	D:\hc--document\all text\P8_medical\thesis_dataset\use_wav_raw\674019182\2292544488.wav	0	0	[0.8737969398, 0.5069277883, 0.8881338239, 0.205909729, 0.3764131367, 0.656032145]	0.873797	0.506928	0.888134	0.20591	0.376413	0.656032
959	117	jd	cy_246322882_438750675.wav	D:\hc--document\all text\P8_medical\thesis_dataset\use_wav_raw\246322882\438750675.wav	0	2	[0.3235313594, 1.6872034073, 1.7991318703, 0.0694494098, 0.338654846, 0.3280797601]	0.323531	1.6872	1.79913	0.0694494	0.338655	0.32808
960	1100	general	cy_658526958_2107618442.wav	D:\hc--document\all text\P8_medical\thesis_dataset\use_wav_raw\658526958\2107618442.wav	0	0	[1.0770337582, 0.0459122583, 0.2409542203, 1.0815471411, 0.4396200776, 0.9034621716]	1.07703	0.0459123	0.240954	1.08155	0.43962	0.903462
961	1232	general	cy_558658551_1580499506.wav	D:\hc--document\all text\P8_medical\thesis_dataset\use_wav_raw\558658551\1580499506.wav	0	0	[1.1569838524, 0.2268393934, 0.4654474556, 0.3893598616, 0.394703716, 1.0077681541]	1.15698	0.226839	0.465447	0.38936	0.394704	1.00777
962	467	rouhe	cy_712262776_3116183897.wav	D:\hc--document\all text\P8_medical\thesis_dataset\use_wav_raw\712262776\3116183897.wav	0	4	[1.2036224604, 0.1072817072, 0.4620703757, 0.1875053793, 1.3411113024, 0.1898819506]	1.20362	0.107282	0.46207	0.187505	1.34111	0.189882
963	1409	rouhe	cy_720637918_3305010066.wav	D:\hc--document\all text\P8_medical\thesis_dataset\use_wav_raw\720637918\3305010066.wav	0	4	[1.2778593302, 0.0026841636, 0.3380886316, 0.4674688578, 1.2583580017, 0.465790391]	1.27786	0.00268416	0.338089	0.467469	1.25836	0.46579
964	105	jd	dx_87480948_25572209.wav	D:\hc--document\all text\P8_medical\thesis_dataset\use_wav_raw\87480948\25572209.wav	0	2	[0.9858144522, 0.2855085731, 0.676009357, 0.3300260007, 0.4409068525, 0.7935064435]	0.985814	0.285509	0.676009	0.330026	0.440907	0.793506
965	1417	general	cy_673436912_2280166830.wav	D:\hc--document\all text\P8_medical\thesis_dataset\use_wav_raw\673436912\2280166830.wav	0	0	[1.1277726889, 0.1823673993, 0.461547941, 0.4343985617, 0.7799909711, 0.8325282335]	1.12777	0.182367	0.461548	0.434399	0.779991	0.832528
966	1354	wz	dx_91318189_30438183.wav	D:\hc--document\all text\P8_medical\thesis_dataset\use_wav_raw\91318189\30438183.wav	0	3	[0.9285456538, 0.1127982587, 0.2294380963, 1.4605987072, 1.0987850428, 0.3985069692]	0.928546	0.112798	0.229438	1.4606	1.09879	0.398507
967	1046	rouhe	cy_672426165_2259864262.wav	D:\hc--document\all text\P8_medical\thesis_dataset\use_wav_raw\672426165\2259864262.wav	0	4	[1.0635102987, 0.1310615689, 0.6044252515, 0.1456397623, 1.1878432035, 0.3664952815]	1.06351	0.131062	0.604425	0.14564	1.18784	0.366495
968	1132	general	cy_559127139_1581859070.wav	D:\hc--document\all text\P8_medical\thesis_dataset\use_wav_raw\559127139\1581859070.wav	0	0	[1.1524906158, 0.0480797142, 0.4795579612, 0.1954448074, 1.4854371548, 0.301967442]	1.15249	0.0480797	0.479558	0.195445	1.48544	0.301967
969	128	fn	dx_82197151_23380685.wav	D:\hc--document\all text\P8_medical\thesis_dataset\use_wav_raw\82197151\23380685.wav	0	1	[0.3050827682, 1.8794984818, 1.6705027819, 0.1191906705, 0.1519916952, 0.4338276982]	0.305083	1.8795	1.6705	0.119191	0.151992	0.433828
970	422	rouhe	cy_719042934_3267630655.wav	D:\hc--document\all text\P8_medical\thesis_dataset\use_wav_raw\719042934\3267630655.wav	0	4	[0.981569767, 0.0, 0.2330922633, 1.1156653166, 1.1480982304, 0.4640773237]	0.98157	0	0.233092	1.11567	1.1481	0.464077
971	351	general	cy_696977954_2784237288.wav	D:\hc--document\all text\P8_medical\thesis_dataset\use_wav_raw\696977954\2784237288.wav	0	0	[1.2158366442, 0.4631481767, 0.2017810941, 0.9151716828, 0.2944802642, 1.3940265179]	1.21584	0.463148	0.201781	0.915172	0.29448	1.39403
972	106	rouhe	cy_686369940_2558452698.wav	D:\hc--document\all text\P8_medical\thesis_dataset\use_wav_raw\686369940\2558452698.wav	0	4	[0.4655199051, 1.3306725025, 1.5924435854, 0.1027067527, 0.2849829495, 0.1190164313]	0.46552	1.33067	1.59244	0.102707	0.284983	0.119016
973	1085	wz	dx_91780118_30726420.wav	D:\hc--document\all text\P8_medical\thesis_dataset\use_wav_raw\91780118\30726420.wav	0	3	[1.1483300924, 0.3890036345, 0.4669439793, 0.3536148369, 0.3820562363, 1.1112672091]	1.14833	0.389004	0.466944	0.353615	0.382056	1.11127
974	392	wz	cy_686586466_2563026262.wav	D:\hc--document\all text\P8_medical\thesis_dataset\use_wav_raw\686586466\2563026262.wav	0	3	[1.2013430595, 0.0307062957, 0.2849859893, 1.094925046, 1.2413890362, 0.3858151436]	1.20134	0.0307063	0.284986	1.09493	1.24139	0.385815
975	1655	rouhe	cy_685967970_2549542560.wav	D:\hc--document\all text\P8_medical\thesis_dataset\use_wav_raw\685967970\2549542560.wav	0	4	[1.1624170542, 0.0583950356, 0.4185733795, 0.3120354712, 1.454028964, 0.3290354908]	1.16242	0.058395	0.418573	0.312035	1.45403	0.329035
976	365	yl	dx_91235022_30006593.wav	D:\hc--document\all text\P8_medical\thesis_dataset\use_wav_raw\91235022\30006593.wav	0	5	[0.3372071087, 1.9037380219, 1.6804361343, 0.1035520881, 0.2846270502, 0.3708908856]	0.337207	1.90374	1.68044	0.103552	0.284627	0.370891
977	321	yl	cy_702090530_2897551478.wav	D:\hc--document\all text\P8_medical\thesis_dataset\use_wav_raw\702090530\2897551478.wav	0	5	[0.5636348724, 0.893602252, 1.2286957502, 0.1621548235, 0.2386208922, 0.5156071782]	0.563635	0.893602	1.2287	0.162155	0.238621	0.515607
978	1051	jd	cy_559307656_1582845569.wav	D:\hc--document\all text\P8_medical\thesis_dataset\use_wav_raw\559307656\1582845569.wav	0	2	[1.0286861658, 0.4259379506, 0.6736547351, 0.5137062669, 0.7544648647, 0.3410457373]	1.02869	0.425938	0.673655	0.513706	0.754465	0.341046
979	1175	rouhe	dx_91546059_30812324.wav	D:\hc--document\all text\P8_medical\thesis_dataset\use_wav_raw\91546059\30812324.wav	0	4	[0.4002615213, 1.4541268349, 1.5955256224, 0.1491313726, 0.3071852922, 0.1624143422]	0.400262	1.45413	1.59553	0.149131	0.307185	0.162414
980	1300	wz	cy_558893147_1580733125.wav	D:\hc--document\all text\P8_medical\thesis_dataset\use_wav_raw\558893147\1580733125.wav	0	3	[0.9636601806, 0.2422398925, 0.1518725157, 1.2233611345, 0.1769199967, 1.2492420673]	0.96366	0.24224	0.151873	1.22336	0.17692	1.24924
981	1292	general	cy_686455663_2560274202.wav	D:\hc--document\all text\P8_medical\thesis_dataset\use_wav_raw\686455663\2560274202.wav	0	0	[0.7627099156, 0.527348876, 0.994656086, 0.1497179568, 1.1274821758, 0.0]	0.76271	0.527349	0.994656	0.149718	1.12748	0
982	487	rouhe	cy_723885214_3380546834.wav	D:\hc--document\all text\P8_medical\thesis_dataset\use_wav_raw\723885214\3380546834.wav	0	4	[0.9540696144, 0.0720806122, 0.1930377483, 1.2684440613, 1.2695870399, 0.2348808795]	0.95407	0.0720806	0.193038	1.26844	1.26959	0.234881
983	531	yl	cy_704045054_2942187100.wav	D:\hc--document\all text\P8_medical\thesis_dataset\use_wav_raw\704045054\2942187100.wav	0	5	[1.2813396454, 0.0152843539, 0.2795045078, 0.5329080224, 1.3533484936, 0.5436347127]	1.28134	0.0152844	0.279505	0.532908	1.35335	0.543635
984	999	general	cy_653060809_2077101920.wav	D:\hc--document\all text\P8_medical\thesis_dataset\use_wav_raw\653060809\2077101920.wav	0	0	[0.2273213267, 1.9383486509, 1.719825387, 0.0962067693, 0.2658098042, 0.3148056865]	0.227321	1.93835	1.71983	0.0962068	0.26581	0.314806
985	491	general	cy_262437870_485345939.wav	D:\hc--document\all text\P8_medical\thesis_dataset\use_wav_raw\262437870\485345939.wav	0	0	[0.4941225648, 1.0832135677, 1.4063024521, 0.1741811335, 0.2734622657, 0.1588940024]	0.494123	1.08321	1.4063	0.174181	0.273462	0.158894
986	1706	fn	dx_44803920_11468063.wav	D:\hc--document\all text\P8_medical\thesis_dataset\use_wav_raw\44803920\11468063.wav	0	1	[0.301628232, 1.8504856825, 1.6824723482, 0.1520245671, 0.3042752445, 0.369769007]	0.301628	1.85049	1.68247	0.152025	0.304275	0.369769
987	60	rouhe	cy_713538670_3141961824.wav	D:\hc--document\all text\P8_medical\thesis_dataset\use_wav_raw\713538670\3141961824.wav	0	4	[1.2438063622, 0.0736937821, 0.3338551223, 0.393486619, 1.460649848, 0.3564878106]	1.24381	0.0736938	0.333855	0.393487	1.46065	0.356488
988	965	jd	cy_713977967_3150918268.wav	D:\hc--document\all text\P8_medical\thesis_dataset\use_wav_raw\713977967\3150918268.wav	0	2	[0.9888410568, 0.0080524888, 0.2677100301, 1.1938977242, 1.3780665398, 0.2818907499]	0.988841	0.00805249	0.26771	1.1939	1.37807	0.281891
989	1145	jd	dx_87113535_26726089.wav	D:\hc--document\all text\P8_medical\thesis_dataset\use_wav_raw\87113535\26726089.wav	0	2	[0.6439305544, 1.3566539288, 1.3007842302, 0.2297370434, 0.3356549144, 0.7257219553]	0.643931	1.35665	1.30078	0.229737	0.335655	0.725722
990	1002	fn	cy_718175718_3248273898.wav	D:\hc--document\all text\P8_medical\thesis_dataset\use_wav_raw\718175718\3248273898.wav	0	1	[0.2099131793, 1.9044094086, 1.7315524817, 0.0625277087, 0.2535840571, 0.4332514405]	0.209913	1.90441	1.73155	0.0625277	0.253584	0.433251
991	1624	yl	cy_681792506_2459629800.wav	D:\hc--document\all text\P8_medical\thesis_dataset\use_wav_raw\681792506\2459629800.wav	0	5	[1.010427475, 0.5096793175, 0.7044790983, 0.3733738959, 0.4726902246, 1.0427049398]	1.01043	0.509679	0.704479	0.373374	0.47269	1.0427
992	1283	general	cy_716569712_3211675995.wav	D:\hc--document\all text\P8_medical\thesis_dataset\use_wav_raw\716569712\3211675995.wav	0	0	[1.0503460169, 0.0, 0.2381146699, 1.1380233765, 1.0085773468, 0.4642605186]	1.05035	0	0.238115	1.13802	1.00858	0.464261
993	126	wz	cy_699053466_2830136712.wav	D:\hc--document\all text\P8_medical\thesis_dataset\use_wav_raw\699053466\2830136712.wav	0	3	[0.9681985974, 0.1434439123, 0.2230747044, 1.4391638041, 1.005305171, 0.3788569868]	0.968199	0.143444	0.223075	1.43916	1.00531	0.378857
994	1445	jd	dx_81776932_27424619.wav	D:\hc--document\all text\P8_medical\thesis_dataset\use_wav_raw\81776932\27424619.wav	0	2	[0.5526037216, 1.5018365383, 1.5749268532, 0.0619851574, 0.3772424459, 0.1153083965]	0.552604	1.50184	1.57493	0.0619852	0.377242	0.115308
995	82	fn	cy_676786803_2350747504.wav	D:\hc--document\all text\P8_medical\thesis_dataset\use_wav_raw\676786803\2350747504.wav	0	1	[0.2246336937, 2.0745415688, 1.6992496252, 0.0357491598, 0.1553069949, 0.4343512058]	0.224634	2.07454	1.69925	0.0357492	0.155307	0.434351
996	1057	fn	cy_714475163_3162226874.wav	D:\hc--document\all text\P8_medical\thesis_dataset\use_wav_raw\714475163\3162226874.wav	0	1	[0.2603714466, 1.8788336515, 1.652629137, 0.0762966648, 0.1409057975, 0.5462813973]	0.260371	1.87883	1.65263	0.0762967	0.140906	0.546281
997	1523	rouhe	cy_722634939_3349321458.wav	D:\hc--document\all text\P8_medical\thesis_dataset\use_wav_raw\722634939\3349321458.wav	0	4	[0.9060434699, 0.0399040803, 0.1132376119, 1.5543192625, 1.1952614784, 0.27932778]	0.906043	0.0399041	0.113238	1.55432	1.19526	0.279328
998	1376	jd	cy_426560017_1032271755.wav	D:\hc--document\all text\P8_medical\thesis_dataset\use_wav_raw\426560017\1032271755.wav	0	2	[0.2897151113, 1.9959206581, 1.6278712749, 0.1415683776, 0.1826346666, 0.5105925202]	0.289715	1.99592	1.62787	0.141568	0.182635	0.510593
999	97	yl	cy_636111885_1988130272.wav	D:\hc--document\all text\P8_medical\thesis_dataset\use_wav_raw\636111885\1988130272.wav	0	5	[1.0519590378, 0.5309074521, 0.3863748908, 0.647361517, 0.3825704753, 1.559301734]	1.05196	0.530907	0.386375	0.647362	0.38257	1.5593
1000	358	wz	dx_46530228_11963915.wav	D:\hc--document\all text\P8_medical\thesis_dataset\use_wav_raw\46530228\11963915.wav	0	3	[1.0391719341, 0.1053437814, 0.1527124196, 1.4211914539, 0.8810535073, 0.5970385075]	1.03917	0.105344	0.152712	1.42119	0.881054	0.597039
1001	1772	fn	cy_447117042_1108322958.wav	D:\hc--document\all text\P8_medical\thesis_dataset\use_wav_raw\447117042\1108322958.wav	0	1	[0.2097167373, 1.9505331516, 1.7178496122, 0.0644959286, 0.2733068466, 0.4242626429]	0.209717	1.95053	1.71785	0.0644959	0.273307	0.424263
1002	173	rouhe	cy_723062044_3359682563.wav	D:\hc--document\all text\P8_medical\thesis_dataset\use_wav_raw\723062044\3359682563.wav	0	4	[1.2569619417, 0.1371959448, 0.3034088016, 0.3221577108, 1.0457173586, 0.568467617]	1.25696	0.137196	0.303409	0.322158	1.04572	0.568468
1003	346	general	cy_614596323_1872433820.wav	D:\hc--document\all text\P8_medical\thesis_dataset\use_wav_raw\614596323\1872433820.wav	0	0	[1.2431530952, 0.1777436286, 0.3506891131, 0.5863747597, 0.6042937636, 0.9279201627]	1.24315	0.177744	0.350689	0.586375	0.604294	0.92792
1004	500	fn	dx_89936441_28358328.wav	D:\hc--document\all text\P8_medical\thesis_dataset\use_wav_raw\89936441\28358328.wav	0	1	[0.1704023629, 2.1077744961, 1.7039922476, 0.1222835407, 0.1700834781, 0.4844217598]	0.170402	2.10777	1.70399	0.122284	0.170083	0.484422
1005	952	jd	dx_92172971_31444968.wav	D:\hc--document\all text\P8_medical\thesis_dataset\use_wav_raw\92172971\31444968.wav	0	2	[1.1978912354, 0.0718156099, 0.4018498659, 0.3375158906, 0.6600455046, 0.8016501069]	1.19789	0.0718156	0.40185	0.337516	0.660046	0.80165
1006	229	general	dx_61161064_16705545.wav	D:\hc--document\all text\P8_medical\thesis_dataset\use_wav_raw\61161064\16705545.wav	0	0	[0.7255917192, 0.7581801414, 1.1807508469, 0.2352014482, 0.1911092848, 0.3446575105]	0.725592	0.75818	1.18075	0.235201	0.191109	0.344658
1007	1148	yl	cy_576879987_1674974126.wav	D:\hc--document\all text\P8_medical\thesis_dataset\use_wav_raw\576879987\1674974126.wav	0	5	[0.9053381085, 0.9500890374, 0.7314844131, 0.4904257655, 0.3966600299, 1.4316984415]	0.905338	0.950089	0.731484	0.490426	0.39666	1.4317
1008	826	fn	dx_87940846_26364265.wav	D:\hc--document\all text\P8_medical\thesis_dataset\use_wav_raw\87940846\26364265.wav	0	1	[0.8998483419, 0.0758903399, 0.263854593, 1.4184423685, 1.2280201912, 0.2262209654]	0.899848	0.0758903	0.263855	1.41844	1.22802	0.226221
1009	482	fn	dx_65131738_18074045.wav	D:\hc--document\all text\P8_medical\thesis_dataset\use_wav_raw\65131738\18074045.wav	0	1	[0.2868706882, 1.9154965878, 1.6216762066, 0.1570626199, 0.2392676473, 0.5462456346]	0.286871	1.9155	1.62168	0.157063	0.239268	0.546246
1010	1414	wz	cy_652283658_2072815865.wav	D:\hc--document\all text\P8_medical\thesis_dataset\use_wav_raw\652283658\2072815865.wav	0	3	[1.0841066837, 0.0, 0.2297102511, 1.2494046688, 0.5925149322, 0.7735418081]	1.08411	0	0.22971	1.2494	0.592515	0.773542
1011	98	wz	cy_672485230_2260129632.wav	D:\hc--document\all text\P8_medical\thesis_dataset\use_wav_raw\672485230\2260129632.wav	0	3	[1.0969783068, 0.0, 0.1770687401, 1.3258535862, 0.4727669954, 0.8004242778]	1.09698	0	0.177069	1.32585	0.472767	0.800424
1012	176	general	cy_721261711_3319157425.wav	D:\hc--document\all text\P8_medical\thesis_dataset\use_wav_raw\721261711\3319157425.wav	0	0	[1.190487504, 0.207134366, 0.3645695746, 0.7414703965, 0.7197662592, 1.0592329502]	1.19049	0.207134	0.36457	0.74147	0.719766	1.05923
1013	1666	general	cy_675692106_2327765294.wav	D:\hc--document\all text\P8_medical\thesis_dataset\use_wav_raw\675692106\2327765294.wav	0	0	[1.2590717077, 0.0, 0.2791188359, 0.6165427566, 1.1922578812, 0.5502271056]	1.25907	0	0.279119	0.616543	1.19226	0.550227
1014	61	rouhe	cy_551006557_1542695177.wav	D:\hc--document\all text\P8_medical\thesis_dataset\use_wav_raw\551006557\1542695177.wav	0	4	[1.2334779501, 0.0167158209, 0.3844998777, 0.3502306044, 1.4314208031, 0.2324667573]	1.23348	0.0167158	0.3845	0.350231	1.43142	0.232467
1015	1652	rouhe	dx_92932467_32351523.wav	D:\hc--document\all text\P8_medical\thesis_dataset\use_wav_raw\92932467\32351523.wav	0	4	[0.3487160802, 1.7858093977, 1.5277094841, 0.1243990213, 0.2862846255, 0.6908720732]	0.348716	1.78581	1.52771	0.124399	0.286285	0.690872
1016	352	fn	cy_687216436_2576900380.wav	D:\hc--document\all text\P8_medical\thesis_dataset\use_wav_raw\687216436\2576900380.wav	0	1	[0.274711132, 1.9005349874, 1.628262043, 0.1362064779, 0.2394856662, 0.431755662]	0.274711	1.90053	1.62826	0.136206	0.239486	0.431756
1017	1648	fn	cy_588642862_1738618973.wav	D:\hc--document\all text\P8_medical\thesis_dataset\use_wav_raw\588642862\1738618973.wav	0	1	[0.2368710488, 1.8330098391, 1.7840510607, 0.0634745061, 0.2906657755, 0.3011377752]	0.236871	1.83301	1.78405	0.0634745	0.290666	0.301138
1018	845	general	cy_716227219_3203273393.wav	D:\hc--document\all text\P8_medical\thesis_dataset\use_wav_raw\716227219\3203273393.wav	0	0	[0.943377018, 0.4028879106, 0.7579047084, 0.2214714736, 0.8749893904, 0.144636482]	0.943377	0.402888	0.757905	0.221471	0.874989	0.144636
1019	1698	general	dx_90996606_29958209.wav	D:\hc--document\all text\P8_medical\thesis_dataset\use_wav_raw\90996606\29958209.wav	0	0	[0.8390175104, 0.7417747974, 0.9285838604, 0.2208556384, 0.1396925896, 0.7229341865]	0.839018	0.741775	0.928584	0.220856	0.139693	0.722934
1020	1361	fn	cy_713737049_3145639537.wav	D:\hc--document\all text\P8_medical\thesis_dataset\use_wav_raw\713737049\3145639537.wav	0	1	[1.0995855331, 0.1446068585, 0.2491719872, 1.0827112198, 1.3041933775, 0.3561077416]	1.09959	0.144607	0.249172	1.08271	1.30419	0.356108
1021	1644	wz	dx_88321047_26888877.wav	D:\hc--document\all text\P8_medical\thesis_dataset\use_wav_raw\88321047\26888877.wav	0	3	[1.0214142799, 0.0125837531, 0.3599040806, 1.1439123154, 1.2935246229, 0.3213950396]	1.02141	0.0125838	0.359904	1.14391	1.29352	0.321395
1022	152	wz	cy_706669858_3004448794.wav	D:\hc--document\all text\P8_medical\thesis_dataset\use_wav_raw\706669858\3004448794.wav	0	3	[0.8874090314, 0.1313963681, 0.2697517574, 1.4289125204, 1.2503938675, 0.3945021331]	0.887409	0.131396	0.269752	1.42891	1.25039	0.394502
1023	450	jd	cy_681794173_2459635838.wav	D:\hc--document\all text\P8_medical\thesis_dataset\use_wav_raw\681794173\2459635838.wav	0	2	[0.9926442504, 0.5980484486, 0.8405054212, 0.2639153004, 0.4929283857, 1.1762132645]	0.992644	0.598048	0.840505	0.263915	0.492928	1.17621
1024	174	fn	cy_720903165_3310751723.wav	D:\hc--document\all text\P8_medical\thesis_dataset\use_wav_raw\720903165\3310751723.wav	0	1	[0.4364475012, 1.393619895, 1.4427605867, 0.1462295353, 0.3114890456, 0.7720079422]	0.436448	1.39362	1.44276	0.14623	0.311489	0.772008
1025	371	rouhe	dx_89965794_28526281.wav	D:\hc--document\all text\P8_medical\thesis_dataset\use_wav_raw\89965794\28526281.wav	0	4	[0.9273549318, 0.0, 0.3088347316, 1.28878057, 1.3480461836, 0.4407359362]	0.927355	0	0.308835	1.28878	1.34805	0.440736
1026	536	rouhe	cy_558518697_1578885533.wav	D:\hc--document\all text\P8_medical\thesis_dataset\use_wav_raw\558518697\1578885533.wav	0	4	[1.1477468014, 0.0, 0.3106834292, 0.8884808421, 1.2494895458, 0.2891000509]	1.14775	0	0.310683	0.888481	1.24949	0.2891
1027	677	jd	cy_719454311_3278267602.wav	D:\hc--document\all text\P8_medical\thesis_dataset\use_wav_raw\719454311\3278267602.wav	0	2	[0.1536239088, 1.9799845219, 1.7526807785, 0.1016131118, 0.2100263089, 0.4834934771]	0.153624	1.97998	1.75268	0.101613	0.210026	0.483493
1028	1550	jd	cy_82166257_51575191.wav	D:\hc--document\all text\P8_medical\thesis_dataset\use_wav_raw\82166257\51575191.wav	0	2	[0.7587997317, 0.8310294747, 1.1710506678, 0.1786842942, 0.4211963713, 0.3689753711]	0.7588	0.831029	1.17105	0.178684	0.421196	0.368975
1029	178	rouhe	cy_715333125_3182174694.wav	D:\hc--document\all text\P8_medical\thesis_dataset\use_wav_raw\715333125\3182174694.wav	0	4	[1.0456749201, 0.0, 0.2189902663, 1.1187529564, 1.232833147, 0.402035892]	1.04567	0	0.21899	1.11875	1.23283	0.402036
1030	192	fn	cy_716446136_3208392498.wav	D:\hc--document\all text\P8_medical\thesis_dataset\use_wav_raw\716446136\3208392498.wav	0	1	[1.061630249, 0.7534543872, 0.4754812717, 0.6881195307, 0.3957602084, 1.5035939217]	1.06163	0.753454	0.475481	0.68812	0.39576	1.50359
1031	1392	wz	cy_711400976_3100266234.wav	D:\hc--document\all text\P8_medical\thesis_dataset\use_wav_raw\711400976\3100266234.wav	0	3	[0.8348066211, 0.0378060341, 0.2817849517, 1.4852887392, 1.1298687458, 0.385666579]	0.834807	0.037806	0.281785	1.48529	1.12987	0.385667
1032	1678	fn	cy_723129778_3362322766.wav	D:\hc--document\all text\P8_medical\thesis_dataset\use_wav_raw\723129778\3362322766.wav	0	1	[0.9267682433, 0.1417983472, 0.2512535453, 1.4099946022, 1.3965432644, 0.3080003858]	0.926768	0.141798	0.251254	1.40999	1.39654	0.308
1033	350	jd	dx_91851747_31121940.wav	D:\hc--document\all text\P8_medical\thesis_dataset\use_wav_raw\91851747\31121940.wav	0	2	[0.2651947439, 1.8985956907, 1.6667973995, 0.1616841108, 0.1685083061, 0.6197809577]	0.265195	1.8986	1.6668	0.161684	0.168508	0.619781
1034	1197	wz	dx_92669333_32166487.wav	D:\hc--document\all text\P8_medical\thesis_dataset\use_wav_raw\92669333\32166487.wav	0	3	[1.0713019371, 0.0127295433, 0.39295277, 0.8801391721, 1.3231918812, 0.3548176885]	1.0713	0.0127295	0.392953	0.880139	1.32319	0.354818
1035	970	wz	cy_715565664_3186393852.wav	D:\hc--document\all text\P8_medical\thesis_dataset\use_wav_raw\715565664\3186393852.wav	0	3	[1.1050515175, 0.1820712835, 0.3936172426, 0.868899107, 1.4855355024, 0.2840227485]	1.10505	0.182071	0.393617	0.868899	1.48554	0.284023
1036	646	rouhe	cy_678809858_2394389778.wav	D:\hc--document\all text\P8_medical\thesis_dataset\use_wav_raw\678809858\2394389778.wav	0	4	[1.0134831667, 0.0, 0.2094122171, 1.2690184116, 1.1151766777, 0.40904513]	1.01348	0	0.209412	1.26902	1.11518	0.409045
1037	1511	general	cy_721791920_3332092437.wav	D:\hc--document\all text\P8_medical\thesis_dataset\use_wav_raw\721791920\3332092437.wav	0	0	[1.1113437414, 0.1209583208, 0.2133606821, 1.2302062511, 0.4230799079, 0.9606342316]	1.11134	0.120958	0.213361	1.23021	0.42308	0.960634
1038	1759	yl	cy_646286925_2040826322.wav	D:\hc--document\all text\P8_medical\thesis_dataset\use_wav_raw\646286925\2040826322.wav	0	5	[0.4221272171, 1.2392730713, 1.5313998461, 0.1479044706, 0.4516769648, 0.0903735086]	0.422127	1.23927	1.5314	0.147904	0.451677	0.0903735
1039	1313	wz	cy_610405073_1849452851.wav	D:\hc--document\all text\P8_medical\thesis_dataset\use_wav_raw\610405073\1849452851.wav	0	3	[1.0732479095, 0.221965313, 0.2485311925, 1.3433278799, 0.64425385, 0.7889772654]	1.07325	0.221965	0.248531	1.34333	0.644254	0.788977
1040	1265	fn	cy_655084960_2088064124.wav	D:\hc--document\all text\P8_medical\thesis_dataset\use_wav_raw\655084960\2088064124.wav	0	1	[0.21842511, 1.8192324638, 1.7719279528, 0.07965184, 0.322276026, 0.2883950472]	0.218425	1.81923	1.77193	0.0796518	0.322276	0.288395
1041	811	fn	dx_64908531_17857822.wav	D:\hc--document\all text\P8_medical\thesis_dataset\use_wav_raw\64908531\17857822.wav	0	1	[0.3021285236, 1.4933242798, 1.6283749342, 0.080241017, 0.2854600549, 0.4118720591]	0.302129	1.49332	1.62837	0.080241	0.28546	0.411872
1042	1281	jd	dx_87877509_25983734.wav	D:\hc--document\all text\P8_medical\thesis_dataset\use_wav_raw\87877509\25983734.wav	0	2	[0.9482579231, 0.135265395, 0.370303899, 1.3000016212, 0.7297708988, 0.7078019381]	0.948258	0.135265	0.370304	1.3	0.729771	0.707802
1043	1718	rouhe	cy_722554194_3347577803.wav	D:\hc--document\all text\P8_medical\thesis_dataset\use_wav_raw\722554194\3347577803.wav	0	4	[1.0410501957, 0.1449355483, 0.1488002688, 1.4529395103, 1.2490030527, 0.2506893575]	1.04105	0.144936	0.1488	1.45294	1.249	0.250689
1044	620	rouhe	dx_91674781_31508248.wav	D:\hc--document\all text\P8_medical\thesis_dataset\use_wav_raw\91674781\31508248.wav	0	4	[1.0353175402, 0.1804463267, 0.2751418948, 1.2617101669, 1.3663823605, 0.2303632498]	1.03532	0.180446	0.275142	1.26171	1.36638	0.230363
1045	1047	wz	cy_720484531_3300850319.wav	D:\hc--document\all text\P8_medical\thesis_dataset\use_wav_raw\720484531\3300850319.wav	0	3	[1.2339377403, 0.2268696427, 0.2908496857, 0.9552769661, 1.4232629538, 0.5531582832]	1.23394	0.22687	0.29085	0.955277	1.42326	0.553158
1046	1233	rouhe	cy_704012690_2941427630.wav	D:\hc--document\all text\P8_medical\thesis_dataset\use_wav_raw\704012690\2941427630.wav	0	4	[1.0532435179, 0.0692182109, 0.3341187537, 1.1853274107, 1.3177970648, 0.3126197755]	1.05324	0.0692182	0.334119	1.18533	1.3178	0.31262
1047	1312	fn	cy_554879621_1564849520.wav	D:\hc--document\all text\P8_medical\thesis_dataset\use_wav_raw\554879621\1564849520.wav	0	1	[0.3179497421, 1.7001087666, 1.6863262653, 0.0953410566, 0.2779086232, 0.3433247209]	0.31795	1.70011	1.68633	0.0953411	0.277909	0.343325
1048	1054	jd	cy_724434010_3394026077.wav	D:\hc--document\all text\P8_medical\thesis_dataset\use_wav_raw\724434010\3394026077.wav	0	2	[1.0287507772, 0.0, 0.1110504568, 1.4358538389, 0.8355358839, 0.4787960649]	1.02875	0	0.11105	1.43585	0.835536	0.478796
1049	1246	jd	dx_91268747_30185833.wav	D:\hc--document\all text\P8_medical\thesis_dataset\use_wav_raw\91268747\30185833.wav	0	2	[1.0168287754, 0.4335229695, 0.6036413312, 0.3895123303, 0.2315460145, 1.0657885075]	1.01683	0.433523	0.603641	0.389512	0.231546	1.06579
1050	822	wz	dx_87292931_25389248.wav	D:\hc--document\all text\P8_medical\thesis_dataset\use_wav_raw\87292931\25389248.wav	0	3	[0.9997406602, 0.0, 0.3038831055, 1.2853502035, 1.0759670734, 0.3317792118]	0.999741	0	0.303883	1.28535	1.07597	0.331779
1051	74	general	cy_719314770_3274045798.wav	D:\hc--document\all text\P8_medical\thesis_dataset\use_wav_raw\719314770\3274045798.wav	0	0	[1.1651847363, 0.07292521, 0.4047641754, 0.43595016, 1.0634946823, 0.5830376744]	1.16518	0.0729252	0.404764	0.43595	1.06349	0.583038
1052	591	jd	dx_87971977_26113515.wav	D:\hc--document\all text\P8_medical\thesis_dataset\use_wav_raw\87971977\26113515.wav	0	2	[0.1904763877, 1.8655376434, 1.7571582794, 0.0820779279, 0.27827847, 0.3967156708]	0.190476	1.86554	1.75716	0.0820779	0.278278	0.396716
1053	1463	rouhe	cy_718967864_3266657222.wav	D:\hc--document\all text\P8_medical\thesis_dataset\use_wav_raw\718967864\3266657222.wav	0	4	[1.0126866102, 0.1520522535, 0.3539387286, 1.0233970881, 1.5617400408, 0.2151548415]	1.01269	0.152052	0.353939	1.0234	1.56174	0.215155
1054	1514	yl	dx_91276345_30235967.wav	D:\hc--document\all text\P8_medical\thesis_dataset\use_wav_raw\91276345\30235967.wav	0	5	[0.9527953863, 0.4976675808, 0.6847797632, 0.3355379105, 0.3469050825, 1.090490818]	0.952795	0.497668	0.68478	0.335538	0.346905	1.09049
1055	713	rouhe	cy_721780894_3330981514.wav	D:\hc--document\all text\P8_medical\thesis_dataset\use_wav_raw\721780894\3330981514.wav	0	4	[1.1149307489, 0.052327849, 0.4404712021, 0.3867698014, 1.4254803658, 0.1285035461]	1.11493	0.0523278	0.440471	0.38677	1.42548	0.128504
1056	1020	yl	cy_668869400_2185271120.wav	D:\hc--document\all text\P8_medical\thesis_dataset\use_wav_raw\668869400\2185271120.wav	0	5	[1.0798864365, 0.1985896528, 0.5669919252, 0.3352538943, 0.5161933303, 0.8943234086]	1.07989	0.19859	0.566992	0.335254	0.516193	0.894323
1057	375	wz	cy_698844310_2825607786.wav	D:\hc--document\all text\P8_medical\thesis_dataset\use_wav_raw\698844310\2825607786.wav	0	3	[0.9215167761, 0.0828035697, 0.2779811919, 1.5239527225, 0.989646554, 0.4286236763]	0.921517	0.0828036	0.277981	1.52395	0.989647	0.428624
1058	836	yl	cy_675830947_2330643910.wav	D:\hc--document\all text\P8_medical\thesis_dataset\use_wav_raw\675830947\2330643910.wav	0	5	[1.2805308104, 0.0, 0.3400801718, 0.7099822164, 0.3989710808, 1.1652152538]	1.28053	0	0.34008	0.709982	0.398971	1.16522
1059	1371	general	dx_74866813_21070112.wav	D:\hc--document\all text\P8_medical\thesis_dataset\use_wav_raw\74866813\21070112.wav	0	0	[1.1919331551, 0.1428728104, 0.4246127903, 0.1869510114, 1.368175745, 0.2995480001]	1.19193	0.142873	0.424613	0.186951	1.36818	0.299548
1060	504	fn	dx_90709482_29692381.wav	D:\hc--document\all text\P8_medical\thesis_dataset\use_wav_raw\90709482\29692381.wav	0	1	[0.1784038097, 2.0427222252, 1.7042304277, 0.1645476669, 0.2664992809, 0.4388803244]	0.178404	2.04272	1.70423	0.164548	0.266499	0.43888
1061	369	general	cy_715335191_3182373152.wav	D:\hc--document\all text\P8_medical\thesis_dataset\use_wav_raw\715335191\3182373152.wav	0	0	[1.4781962633, 0.0, 0.2072687149, 0.4454551637, 1.3365221024, 0.4289657176]	1.4782	0	0.207269	0.445455	1.33652	0.428966
1062	725	general	cy_453811396_1130327135.wav	D:\hc--document\all text\P8_medical\thesis_dataset\use_wav_raw\453811396\1130327135.wav	0	0	[1.1111851931, 0.1354665607, 0.5456010699, 0.2561285496, 0.6624706388, 0.6505416036]	1.11119	0.135467	0.545601	0.256129	0.662471	0.650542
1063	311	rouhe	cy_723788135_3377804587.wav	D:\hc--document\all text\P8_medical\thesis_dataset\use_wav_raw\723788135\3377804587.wav	0	4	[1.0008478165, 0.0698168054, 0.1986893713, 1.3004881144, 1.2840205431, 0.412447542]	1.00085	0.0698168	0.198689	1.30049	1.28402	0.412448
1064	1410	yl	cy_677828590_2373194028.wav	D:\hc--document\all text\P8_medical\thesis_dataset\use_wav_raw\677828590\2373194028.wav	0	5	[0.7600888014, 0.7229385376, 0.9452145696, 0.2513802052, 0.2926709652, 1.0061055422]	0.760089	0.722939	0.945215	0.25138	0.292671	1.00611
1065	454	fn	cy_601586658_1804438019.wav	D:\hc--document\all text\P8_medical\thesis_dataset\use_wav_raw\601586658\1804438019.wav	0	1	[0.2803174853, 1.8395829201, 1.6330293417, 0.1401772201, 0.1484547406, 0.6216181517]	0.280317	1.83958	1.63303	0.140177	0.148455	0.621618
1066	995	general	cy_683991202_2507823830.wav	D:\hc--document\all text\P8_medical\thesis_dataset\use_wav_raw\683991202\2507823830.wav	0	0	[1.2187865973, 0.0536125451, 0.2123214602, 0.9811738133, 0.6266925931, 1.0424685478]	1.21879	0.0536125	0.212321	0.981174	0.626693	1.04247
1067	215	general	cy_724326778_3391013878.wav	D:\hc--document\all text\P8_medical\thesis_dataset\use_wav_raw\724326778\3391013878.wav	0	0	[1.1187616587, 0.0616767704, 0.2617159784, 1.0594437122, 0.557371974, 0.7648722529]	1.11876	0.0616768	0.261716	1.05944	0.557372	0.764872
1068	1171	general	cy_722533191_3347978216.wav	D:\hc--document\all text\P8_medical\thesis_dataset\use_wav_raw\722533191\3347978216.wav	0	0	[1.1620109081, 0.2321550846, 0.4019758999, 0.4504694939, 0.3950959146, 1.1351616383]	1.16201	0.232155	0.401976	0.450469	0.395096	1.13516
1069	1342	jd	dx_91654991_31398425.wav	D:\hc--document\all text\P8_medical\thesis_dataset\use_wav_raw\91654991\31398425.wav	0	2	[0.4403148293, 1.5410126448, 1.6246281862, 0.0726350695, 0.3473302126, 0.3040083051]	0.440315	1.54101	1.62463	0.0726351	0.34733	0.304008
1070	486	fn	cy_675226815_2318344154.wav	D:\hc--document\all text\P8_medical\thesis_dataset\use_wav_raw\675226815\2318344154.wav	0	1	[0.4736051857, 1.5474463701, 1.6832091808, 0.0264795888, 0.3358252048, 0.0742224976]	0.473605	1.54745	1.68321	0.0264796	0.335825	0.0742225
1071	992	wz	dx_91272171_30203279.wav	D:\hc--document\all text\P8_medical\thesis_dataset\use_wav_raw\91272171\30203279.wav	0	3	[1.0330775976, 0.0242627207, 0.2537502646, 1.1329551935, 0.5729803443, 0.9646916389]	1.03308	0.0242627	0.25375	1.13296	0.57298	0.964692
1072	449	jd	dx_92809223_32241253.wav	D:\hc--document\all text\P8_medical\thesis_dataset\use_wav_raw\92809223\32241253.wav	0	2	[0.36168468, 1.8398170471, 1.5893718004, 0.1406850666, 0.3489423692, 0.3699301481]	0.361685	1.83982	1.58937	0.140685	0.348942	0.36993
1073	1109	rouhe	cy_628654800_1947367796.wav	D:\hc--document\all text\P8_medical\thesis_dataset\use_wav_raw\628654800\1947367796.wav	0	4	[1.3092217445, 0.0235856231, 0.3342725337, 0.2806565762, 1.3893657923, 0.2635031939]	1.30922	0.0235856	0.334273	0.280657	1.38937	0.263503
1074	894	jd	cy_720273354_3296341933.wav	D:\hc--document\all text\P8_medical\thesis_dataset\use_wav_raw\720273354\3296341933.wav	0	2	[0.2335032374, 1.9664493799, 1.738505125, 0.1227980629, 0.3135749102, 0.3551142812]	0.233503	1.96645	1.73851	0.122798	0.313575	0.355114
1075	241	rouhe	cy_721326923_3321012486.wav	D:\hc--document\all text\P8_medical\thesis_dataset\use_wav_raw\721326923\3321012486.wav	0	4	[0.873950839, 0.4512381852, 0.8674949408, 0.2382472754, 1.1821500063, 0.0]	0.873951	0.451238	0.867495	0.238247	1.18215	0
1076	439	wz	dx_88709072_27345242.wav	D:\hc--document\all text\P8_medical\thesis_dataset\use_wav_raw\88709072\27345242.wav	0	3	[0.9648505449, 0.1176946908, 0.2667522728, 1.5010070801, 1.0102192163, 0.4263106287]	0.964851	0.117695	0.266752	1.50101	1.01022	0.426311
1077	880	fn	cy_719825472_3285541864.wav	D:\hc--document\all text\P8_medical\thesis_dataset\use_wav_raw\719825472\3285541864.wav	0	1	[0.161096096, 2.0278096199, 1.7551879883, 0.0604169145, 0.215911001, 0.4454462826]	0.161096	2.02781	1.75519	0.0604169	0.215911	0.445446
1078	1316	wz	dx_88060590_26619380.wav	D:\hc--document\all text\P8_medical\thesis_dataset\use_wav_raw\88060590\26619380.wav	0	3	[0.8643065691, 0.0685441941, 0.2725111842, 1.4618910551, 1.2206058502, 0.3011051118]	0.864307	0.0685442	0.272511	1.46189	1.22061	0.301105
1079	112	rouhe	cy_720248202_3296035622.wav	D:\hc--document\all text\P8_medical\thesis_dataset\use_wav_raw\720248202\3296035622.wav	0	4	[1.2681769133, 0.1243914068, 0.3516272604, 0.2416874766, 1.3082896471, 0.3254958689]	1.26818	0.124391	0.351627	0.241687	1.30829	0.325496
1080	80	wz	cy_724073231_3385593885.wav	D:\hc--document\all text\P8_medical\thesis_dataset\use_wav_raw\724073231\3385593885.wav	0	3	[1.1087287664, 0.2878109813, 0.463136822, 0.4166661799, 0.4814969897, 1.0989309549]	1.10873	0.287811	0.463137	0.416666	0.481497	1.09893
1081	318	wz	cy_672155269_2253169020.wav	D:\hc--document\all text\P8_medical\thesis_dataset\use_wav_raw\672155269\2253169020.wav	0	3	[1.0136854649, 0.0118254963, 0.3708187342, 1.267311573, 1.2159975767, 0.3373917341]	1.01369	0.0118255	0.370819	1.26731	1.216	0.337392
1082	1273	general	dx_88577425_28073495.wav	D:\hc--document\all text\P8_medical\thesis_dataset\use_wav_raw\88577425\28073495.wav	0	0	[0.6978645921, 0.9113540649, 1.2379239798, 0.2373857796, 0.2934031188, 0.4650461376]	0.697865	0.911354	1.23792	0.237386	0.293403	0.465046
1083	1771	yl	cy_569748690_1636200815.wav	D:\hc--document\all text\P8_medical\thesis_dataset\use_wav_raw\569748690\1636200815.wav	0	5	[0.7782697082, 1.0366799831, 1.0860780478, 0.2177511007, 0.3754345775, 1.0266395807]	0.77827	1.03668	1.08608	0.217751	0.375435	1.02664
1084	1713	fn	cy_711699233_3105915068.wav	D:\hc--document\all text\P8_medical\thesis_dataset\use_wav_raw\711699233\3105915068.wav	0	1	[1.1285384893, 0.3939477801, 0.2670512199, 0.8136658072, 0.3312380314, 1.4142323732]	1.12854	0.393948	0.267051	0.813666	0.331238	1.41423
1085	155	fn	dx_89471393_32047086.wav	D:\hc--document\all text\P8_medical\thesis_dataset\use_wav_raw\89471393\32047086.wav	0	1	[0.1842404455, 2.0808978081, 1.7470775843, 0.0483892038, 0.2056966722, 0.4716399312]	0.18424	2.0809	1.74708	0.0483892	0.205697	0.47164
1086	337	fn	cy_645052453_2034281954.wav	D:\hc--document\all text\P8_medical\thesis_dataset\use_wav_raw\645052453\2034281954.wav	0	1	[0.2277886569, 2.015134573, 1.7247948647, 0.0553639829, 0.2128634155, 0.4383892417]	0.227789	2.01513	1.72479	0.055364	0.212863	0.438389
1087	1449	wz	cy_679138606_2401555442.wav	D:\hc--document\all text\P8_medical\thesis_dataset\use_wav_raw\679138606\2401555442.wav	0	3	[0.9071781635, 0.1229757667, 0.3783117235, 1.2759968042, 1.3828412294, 0.3269237578]	0.907178	0.122976	0.378312	1.276	1.38284	0.326924
1088	247	rouhe	dx_46541792_11856292.wav	D:\hc--document\all text\P8_medical\thesis_dataset\use_wav_raw\46541792\11856292.wav	0	4	[0.3041700125, 1.8329728842, 1.7401729822, 0.1286207587, 0.3132727742, 0.4546053112]	0.30417	1.83297	1.74017	0.128621	0.313273	0.454605
1089	906	jd	dx_91654248_31392632.wav	D:\hc--document\all text\P8_medical\thesis_dataset\use_wav_raw\91654248\31392632.wav	0	2	[0.4553610384, 1.6109844446, 1.5894106627, 0.1414815336, 0.3669818044, 0.2769008279]	0.455361	1.61098	1.58941	0.141482	0.366982	0.276901
1090	1754	rouhe	cy_688514181_2605179066.wav	D:\hc--document\all text\P8_medical\thesis_dataset\use_wav_raw\688514181\2605179066.wav	0	4	[1.0316528082, 0.0993267074, 0.1399587244, 1.4226179123, 1.1526612043, 0.1452246457]	1.03165	0.0993267	0.139959	1.42262	1.15266	0.145225
1091	252	rouhe	cy_718567292_3257186425.wav	D:\hc--document\all text\P8_medical\thesis_dataset\use_wav_raw\718567292\3257186425.wav	0	4	[0.9005702138, 0.02505951, 0.1918994337, 1.4962525368, 1.1430563927, 0.2770293355]	0.90057	0.0250595	0.191899	1.49625	1.14306	0.277029
1092	564	wz	dx_91048746_30295162.wav	D:\hc--document\all text\P8_medical\thesis_dataset\use_wav_raw\91048746\30295162.wav	0	3	[1.1574546099, 0.1133240908, 0.2872947454, 0.7344620824, 1.3995004892, 0.3050864935]	1.15745	0.113324	0.287295	0.734462	1.3995	0.305086
1093	1065	fn	cy_706612942_3003408094.wav	D:\hc--document\all text\P8_medical\thesis_dataset\use_wav_raw\706612942\3003408094.wav	0	1	[0.1206678972, 1.9935064316, 1.7632244825, 0.0769199729, 0.068330884, 0.5029866099]	0.120668	1.99351	1.76322	0.07692	0.0683309	0.502987
1094	131	general	dx_61374609_16770485.wav	D:\hc--document\all text\P8_medical\thesis_dataset\use_wav_raw\61374609\16770485.wav	0	0	[1.0452452898, 0.2311977446, 0.6547186971, 0.1773344576, 1.2533304691, 0.0989601538]	1.04525	0.231198	0.654719	0.177334	1.25333	0.0989602
1095	1298	general	dx_90145601_28936579.wav	D:\hc--document\all text\P8_medical\thesis_dataset\use_wav_raw\90145601\28936579.wav	0	0	[1.1084728241, 0.0387216955, 0.1158360466, 1.2338993549, 0.3335201442, 1.0040444136]	1.10847	0.0387217	0.115836	1.2339	0.33352	1.00404
1096	458	fn	cy_717205224_3226023282.wav	D:\hc--document\all text\P8_medical\thesis_dataset\use_wav_raw\717205224\3226023282.wav	0	1	[0.2538225949, 1.8986221552, 1.7500071526, 0.0869087055, 0.2246327698, 0.343547672]	0.253823	1.89862	1.75001	0.0869087	0.224633	0.343548
1097	75	fn	cy_652594568_2074363196.wav	D:\hc--document\all text\P8_medical\thesis_dataset\use_wav_raw\652594568\2074363196.wav	0	1	[0.4156941175, 1.7073768377, 1.6870712042, 0.0830465555, 0.3576043248, 0.2556264699]	0.415694	1.70738	1.68707	0.0830466	0.357604	0.255626
1098	959	yl	cy_673000170_2270917874.wav	D:\hc--document\all text\P8_medical\thesis_dataset\use_wav_raw\673000170\2270917874.wav	0	5	[1.0945261717, 0.0, 0.4014918804, 0.7733854055, 1.3403300047, 0.3665959835]	1.09453	0	0.401492	0.773385	1.34033	0.366596
1099	1237	jd	dx_90012679_28793231.wav	D:\hc--document\all text\P8_medical\thesis_dataset\use_wav_raw\90012679\28793231.wav	0	2	[0.2059475929, 1.9431773424, 1.6858190298, 0.1519609094, 0.2133512497, 0.4433822632]	0.205948	1.94318	1.68582	0.151961	0.213351	0.443382
1100	225	rouhe	cy_722628163_3350274107.wav	D:\hc--document\all text\P8_medical\thesis_dataset\use_wav_raw\722628163\3350274107.wav	0	4	[1.1272405386, 0.0, 0.1840399057, 1.0578575134, 1.0559051037, 0.2728978395]	1.12724	0	0.18404	1.05786	1.05591	0.272898
1101	1094	yl	cy_696885126_2781996828.wav	D:\hc--document\all text\P8_medical\thesis_dataset\use_wav_raw\696885126\2781996828.wav	0	5	[0.8579952717, 0.6631720066, 0.7570380569, 0.3439588845, 0.1797539741, 1.0019350052]	0.857995	0.663172	0.757038	0.343959	0.179754	1.00194
1102	827	jd	cy_671600298_2241678048.wav	D:\hc--document\all text\P8_medical\thesis_dataset\use_wav_raw\671600298\2241678048.wav	0	2	[0.3570421934, 1.6122723818, 1.788761735, 0.0220881738, 0.3159076869, 0.194889456]	0.357042	1.61227	1.78876	0.0220882	0.315908	0.194889
1103	1583	fn	dx_61744507_17615803.wav	D:\hc--document\all text\P8_medical\thesis_dataset\use_wav_raw\61744507\17615803.wav	0	1	[0.4275867641, 1.4734914303, 1.4527796507, 0.0979650095, 0.3278940618, 0.7215322852]	0.427587	1.47349	1.45278	0.097965	0.327894	0.721532
1104	484	rouhe	cy_718131530_3247834841.wav	D:\hc--document\all text\P8_medical\thesis_dataset\use_wav_raw\718131530\3247834841.wav	0	4	[1.159799695, 0.0, 0.2051009834, 1.1952537298, 0.9650089741, 0.4767799973]	1.1598	0	0.205101	1.19525	0.965009	0.47678
1105	1216	general	cy_719323138_3274686882.wav	D:\hc--document\all text\P8_medical\thesis_dataset\use_wav_raw\719323138\3274686882.wav	0	0	[0.9439136386, 0.0, 0.2483663708, 1.3251788616, 1.0228683949, 0.326692462]	0.943914	0	0.248366	1.32518	1.02287	0.326692
1106	1139	jd	cy_685418464_2537651848.wav	D:\hc--document\all text\P8_medical\thesis_dataset\use_wav_raw\685418464\2537651848.wav	0	2	[0.4811495543, 1.5079263449, 1.506598115, 0.1447752267, 0.2510312498, 0.3057729006]	0.48115	1.50793	1.5066	0.144775	0.251031	0.305773
1107	1427	general	cy_662243602_2128010234.wav	D:\hc--document\all text\P8_medical\thesis_dataset\use_wav_raw\662243602\2128010234.wav	0	0	[0.5650452375, 1.3483688831, 1.3980373144, 0.1847473979, 0.4355427623, 0.6791193485]	0.565045	1.34837	1.39804	0.184747	0.435543	0.679119
1108	1658	yl	cy_724231569_3388238043.wav	D:\hc--document\all text\P8_medical\thesis_dataset\use_wav_raw\724231569\3388238043.wav	0	5	[0.9946952462, 0.0, 0.3075090945, 1.258787632, 1.182305336, 0.2124490291]	0.994695	0	0.307509	1.25879	1.18231	0.212449
1109	505	wz	cy_682836494_2481883596.wav	D:\hc--document\all text\P8_medical\thesis_dataset\use_wav_raw\682836494\2481883596.wav	0	3	[0.8993692398, 0.0545824915, 0.2063143104, 1.4016911983, 1.2931239605, 0.2759874463]	0.899369	0.0545825	0.206314	1.40169	1.29312	0.275987
1110	1141	yl	cy_572949365_1653327419.wav	D:\hc--document\all text\P8_medical\thesis_dataset\use_wav_raw\572949365\1653327419.wav	0	5	[0.9175184369, 0.447915405, 0.5145867467, 0.4778006375, 0.4335058928, 1.3139106035]	0.917518	0.447915	0.514587	0.477801	0.433506	1.31391
1111	824	general	cy_567507962_1624411358.wav	D:\hc--document\all text\P8_medical\thesis_dataset\use_wav_raw\567507962\1624411358.wav	0	0	[1.1196981668, 0.0, 0.3497461081, 0.440217495, 1.3883340359, 0.3313263953]	1.1197	0	0.349746	0.440217	1.38833	0.331326
1112	951	rouhe	cy_715669586_3189368359.wav	D:\hc--document\all text\P8_medical\thesis_dataset\use_wav_raw\715669586\3189368359.wav	0	4	[1.0679941177, 0.0024893733, 0.4078992009, 0.6389969587, 1.3821960688, 0.1131842062]	1.06799	0.00248937	0.407899	0.638997	1.3822	0.113184
1113	1125	wz	dx_87065558_26448784.wav	D:\hc--document\all text\P8_medical\thesis_dataset\use_wav_raw\87065558\26448784.wav	0	3	[0.8590402007, 0.132702142, 0.31808272, 1.4123215675, 1.3212149143, 0.2108645737]	0.85904	0.132702	0.318083	1.41232	1.32121	0.210865
1114	986	jd	cy_226199558_382195440.wav	D:\hc--document\all text\P8_medical\thesis_dataset\use_wav_raw\226199558\382195440.wav	0	2	[1.2839875221, 0.0, 0.3809700608, 0.1050801724, 1.3993327618, 0.1793895513]	1.28399	0	0.38097	0.10508	1.39933	0.17939
1115	1195	wz	dx_90752887_29898391.wav	D:\hc--document\all text\P8_medical\thesis_dataset\use_wav_raw\90752887\29898391.wav	0	3	[0.9856009483, 0.0441240966, 0.4027130604, 0.998707056, 1.4579379559, 0.1747958958]	0.985601	0.0441241	0.402713	0.998707	1.45794	0.174796
1116	1497	rouhe	cy_715552908_3187119082.wav	D:\hc--document\all text\P8_medical\thesis_dataset\use_wav_raw\715552908\3187119082.wav	0	4	[1.2469770908, 0.1318896711, 0.2815930843, 0.5324433446, 1.1871962547, 0.4960351586]	1.24698	0.13189	0.281593	0.532443	1.1872	0.496035
1117	1101	jd	dx_90298786_29216660.wav	D:\hc--document\all text\P8_medical\thesis_dataset\use_wav_raw\90298786\29216660.wav	0	2	[0.3599530756, 1.6063069105, 1.7128484249, 0.0661399812, 0.2506618798, 0.4523953497]	0.359953	1.60631	1.71285	0.06614	0.250662	0.452395
1118	1222	yl	cy_684385391_2516144486.wav	D:\hc--document\all text\P8_medical\thesis_dataset\use_wav_raw\684385391\2516144486.wav	0	5	[1.2704339027, 0.6204234958, 0.378629297, 0.665158093, 0.5490090251, 1.4895076752]	1.27043	0.620423	0.378629	0.665158	0.549009	1.48951
1119	1268	general	cy_686523101_2561673432.wav	D:\hc--document\all text\P8_medical\thesis_dataset\use_wav_raw\686523101\2561673432.wav	0	0	[1.367751956, 0.17149207, 0.1797225922, 0.8342630267, 0.6155145168, 1.0699976683]	1.36775	0.171492	0.179723	0.834263	0.615515	1.07
1120	848	jd	cy_680719041_2436564060.wav	D:\hc--document\all text\P8_medical\thesis_dataset\use_wav_raw\680719041\2436564060.wav	0	2	[0.3758864403, 1.6996488571, 1.6488934755, 0.0976271927, 0.2223010063, 0.3695628047]	0.375886	1.69965	1.64889	0.0976272	0.222301	0.369563
1121	1440	rouhe	cy_686354401_2558096522.wav	D:\hc--document\all text\P8_medical\thesis_dataset\use_wav_raw\686354401\2558096522.wav	0	4	[1.2316360474, 0.0726421997, 0.3205091357, 0.3999347985, 1.0422252417, 0.6225922704]	1.23164	0.0726422	0.320509	0.399935	1.04223	0.622592
1122	431	yl	cy_685258352_2534321200.wav	D:\hc--document\all text\P8_medical\thesis_dataset\use_wav_raw\685258352\2534321200.wav	0	5	[1.0615891218, 0.49987486, 0.3605217934, 0.8560656309, 0.5225709677, 1.4302992821]	1.06159	0.499875	0.360522	0.856066	0.522571	1.4303
1123	1015	yl	cy_715139638_3177767669.wav	D:\hc--document\all text\P8_medical\thesis_dataset\use_wav_raw\715139638\3177767669.wav	0	5	[0.7584866881, 1.1474659443, 0.9754860997, 0.3703687191, 0.2603095174, 1.3622063398]	0.758487	1.14747	0.975486	0.370369	0.26031	1.36221
1124	989	general	dx_84267791_27048766.wav	D:\hc--document\all text\P8_medical\thesis_dataset\use_wav_raw\84267791\27048766.wav	0	0	[1.1272610426, 0.1303828359, 0.4483914375, 0.2447970062, 0.6134821177, 0.7104321718]	1.12726	0.130383	0.448391	0.244797	0.613482	0.710432
1125	67	fn	cy_615852734_1879293638.wav	D:\hc--document\all text\P8_medical\thesis_dataset\use_wav_raw\615852734\1879293638.wav	0	1	[0.1558566391, 2.0809061527, 1.6803126335, 0.084421739, 0.1840333492, 0.4969781935]	0.155857	2.08091	1.68031	0.0844217	0.184033	0.496978
1126	631	rouhe	dx_88724832_27434617.wav	D:\hc--document\all text\P8_medical\thesis_dataset\use_wav_raw\88724832\27434617.wav	0	4	[0.9812499285, 0.0, 0.2322475761, 1.1795507669, 1.266313076, 0.2297023237]	0.98125	0	0.232248	1.17955	1.26631	0.229702
1127	265	general	cy_720706085_3306675623.wav	D:\hc--document\all text\P8_medical\thesis_dataset\use_wav_raw\720706085\3306675623.wav	0	0	[1.1287511587, 0.2342715263, 0.4162572622, 0.2547124326, 0.9395142794, 0.5679565072]	1.12875	0.234272	0.416257	0.254712	0.939514	0.567957
1128	363	rouhe	cy_710460184_3081999821.wav	D:\hc--document\all text\P8_medical\thesis_dataset\use_wav_raw\710460184\3081999821.wav	0	4	[1.2036192417, 0.01552903, 0.4105574191, 0.2098615319, 1.4976735115, 0.2952775657]	1.20362	0.015529	0.410557	0.209862	1.49767	0.295278
1129	1325	jd	cy_250750809_451221407.wav	D:\hc--document\all text\P8_medical\thesis_dataset\use_wav_raw\250750809\451221407.wav	0	2	[0.6257529855, 1.1419687271, 1.4406325817, 0.0768984854, 0.5807373524, 0.0]	0.625753	1.14197	1.44063	0.0768985	0.580737	0
1130	1751	yl	cy_692862492_2697813298.wav	D:\hc--document\all text\P8_medical\thesis_dataset\use_wav_raw\692862492\2697813298.wav	0	5	[0.2655619085, 1.8236359358, 1.750485301, 0.0700316876, 0.18096596, 0.478426218]	0.265562	1.82364	1.75049	0.0700317	0.180966	0.478426
1131	182	rouhe	cy_680947179_2441773664.wav	D:\hc--document\all text\P8_medical\thesis_dataset\use_wav_raw\680947179\2441773664.wav	0	4	[1.2226477861, 0.1116280183, 0.4136898518, 0.1824619919, 1.2654789686, 0.2299936116]	1.22265	0.111628	0.41369	0.182462	1.26548	0.229994
1132	442	yl	dx_91505479_30592206.wav	D:\hc--document\all text\P8_medical\thesis_dataset\use_wav_raw\91505479\30592206.wav	0	5	[1.0299167633, 0.4148322046, 0.6278961301, 0.3632641733, 0.2835147083, 1.0307974815]	1.02992	0.414832	0.627896	0.363264	0.283515	1.0308
1133	1235	fn	cy_682616739_2477180754.wav	D:\hc--document\all text\P8_medical\thesis_dataset\use_wav_raw\682616739\2477180754.wav	0	1	[0.2942133546, 1.594527483, 1.7790802717, 0.0379075743, 0.2640906572, 0.2493513525]	0.294213	1.59453	1.77908	0.0379076	0.264091	0.249351
1134	1687	wz	dx_90510008_29399386.wav	D:\hc--document\all text\P8_medical\thesis_dataset\use_wav_raw\90510008\29399386.wav	0	3	[1.0797777176, 0.098052755, 0.3446577489, 1.0811275244, 0.7990936041, 0.4534219205]	1.07978	0.0980528	0.344658	1.08113	0.799094	0.453422
1135	1390	wz	cy_724833787_3402647051.wav	D:\hc--document\all text\P8_medical\thesis_dataset\use_wav_raw\724833787\3402647051.wav	0	3	[1.1487247944, 0.1784074903, 0.1746188551, 1.163506031, 0.6549373865, 0.7654722333]	1.14872	0.178407	0.174619	1.16351	0.654937	0.765472
1136	230	general	cy_687661643_2586484136.wav	D:\hc--document\all text\P8_medical\thesis_dataset\use_wav_raw\687661643\2586484136.wav	0	0	[1.110026598, 0.169694066, 0.441467762, 0.3385186791, 0.6378025413, 0.8551858664]	1.11003	0.169694	0.441468	0.338519	0.637803	0.855186
1137	1248	jd	dx_62852692_17212995.wav	D:\hc--document\all text\P8_medical\thesis_dataset\use_wav_raw\62852692\17212995.wav	0	2	[0.2754805684, 1.6963846684, 1.8526653051, 0.0253252294, 0.3067945838, 0.2967034876]	0.275481	1.69638	1.85267	0.0253252	0.306795	0.296703
1138	184	rouhe	cy_722508959_3348022023.wav	D:\hc--document\all text\P8_medical\thesis_dataset\use_wav_raw\722508959\3348022023.wav	0	4	[0.9946234226, 0.0618077964, 0.2502909303, 1.3798590899, 1.2455946207, 0.1944199353]	0.994623	0.0618078	0.250291	1.37986	1.24559	0.19442
1139	644	rouhe	dx_90996490_29956364.wav	D:\hc--document\all text\P8_medical\thesis_dataset\use_wav_raw\90996490\29956364.wav	0	4	[0.8443179727, 0.0, 0.3318917453, 1.2638309002, 1.2098481655, 0.3472786546]	0.844318	0	0.331892	1.26383	1.20985	0.347279
1140	64	rouhe	cy_569154850_1633050683.wav	D:\hc--document\all text\P8_medical\thesis_dataset\use_wav_raw\569154850\1633050683.wav	0	4	[0.9691151977, 0.4247401953, 0.8090686202, 0.0838810056, 1.1309810877, 0.0]	0.969115	0.42474	0.809069	0.083881	1.13098	0
1141	1077	yl	cy_718280120_3251468400.wav	D:\hc--document\all text\P8_medical\thesis_dataset\use_wav_raw\718280120\3251468400.wav	0	5	[1.227637291, 0.1884467304, 0.3324813843, 0.4895363748, 1.0345495939, 0.8032906055]	1.22764	0.188447	0.332481	0.489536	1.03455	0.803291
1142	1120	yl	cy_269301204_505479215.wav	D:\hc--document\all text\P8_medical\thesis_dataset\use_wav_raw\269301204\505479215.wav	0	5	[0.9978336096, 0.3038606048, 0.6518193483, 0.2735429108, 0.3796067238, 0.9489623308]	0.997834	0.303861	0.651819	0.273543	0.379607	0.948962
1143	1537	jd	cy_671096299_2231223224.wav	D:\hc--document\all text\P8_medical\thesis_dataset\use_wav_raw\671096299\2231223224.wav	0	2	[0.2074508369, 1.9149574041, 1.724699378, 0.1287769228, 0.2361294627, 0.4784415364]	0.207451	1.91496	1.7247	0.128777	0.236129	0.478442
1144	743	wz	cy_697975400_2807430946.wav	D:\hc--document\all text\P8_medical\thesis_dataset\use_wav_raw\697975400\2807430946.wav	0	3	[0.6686760783, 0.8388195634, 1.1669659615, 0.1503185034, 0.6668778062, 0.0711445063]	0.668676	0.83882	1.16697	0.150319	0.666878	0.0711445
1145	425	general	cy_674587178_2304692190.wav	D:\hc--document\all text\P8_medical\thesis_dataset\use_wav_raw\674587178\2304692190.wav	0	0	[1.0558909178, 0.0, 0.3627713919, 1.222974658, 1.1548868418, 0.268963933]	1.05589	0	0.362771	1.22297	1.15489	0.268964
1146	1118	wz	dx_71189773_19923543.wav	D:\hc--document\all text\P8_medical\thesis_dataset\use_wav_raw\71189773\19923543.wav	0	3	[1.1901551485, 0.0826653019, 0.3525202274, 0.4600318074, 1.4242119789, 0.2612797618]	1.19016	0.0826653	0.35252	0.460032	1.42421	0.26128
1147	1777	jd	dx_41487008_10578896.wav	D:\hc--document\all text\P8_medical\thesis_dataset\use_wav_raw\41487008\10578896.wav	0	2	[0.9069135785, 0.1371326596, 0.3270822763, 1.2648588419, 1.3937597275, 0.336038202]	0.906914	0.137133	0.327082	1.26486	1.39376	0.336038
1148	1345	rouhe	cy_721229418_3318961225.wav	D:\hc--document\all text\P8_medical\thesis_dataset\use_wav_raw\721229418\3318961225.wav	0	4	[0.9248419404, 0.1057222933, 0.2226764262, 1.4046541452, 1.4162265062, 0.2949895263]	0.924842	0.105722	0.222676	1.40465	1.41623	0.29499
1149	1070	rouhe	cy_691832558_2675352978.wav	D:\hc--document\all text\P8_medical\thesis_dataset\use_wav_raw\691832558\2675352978.wav	0	4	[1.2979820967, 0.0, 0.3054394126, 0.23026447, 1.4190028906, 0.2687841058]	1.29798	0	0.305439	0.230264	1.419	0.268784
1150	610	rouhe	dx_90201711_28696595.wav	D:\hc--document\all text\P8_medical\thesis_dataset\use_wav_raw\90201711\28696595.wav	0	4	[1.1421819925, 0.0286890436, 0.3774516582, 0.4233063161, 1.2378833294, 0.5375910997]	1.14218	0.028689	0.377452	0.423306	1.23788	0.537591
1151	461	rouhe	cy_686262419_2556085716.wav	D:\hc--document\all text\P8_medical\thesis_dataset\use_wav_raw\686262419\2556085716.wav	0	4	[1.0883973837, 0.0, 0.1768739074, 1.0844093561, 1.1743283272, 0.303391695]	1.0884	0	0.176874	1.08441	1.17433	0.303392
1152	444	jd	cy_666616073_2150016284.wav	D:\hc--document\all text\P8_medical\thesis_dataset\use_wav_raw\666616073\2150016284.wav	0	2	[0.7154773474, 1.1290174723, 1.2469863892, 0.1982828081, 0.5044862032, 0.5177624822]	0.715477	1.12902	1.24699	0.198283	0.504486	0.517762
1153	1006	fn	cy_647336634_2046162086.wav	D:\hc--document\all text\P8_medical\thesis_dataset\use_wav_raw\647336634\2046162086.wav	0	1	[1.2379858494, 0.1875264198, 0.074613452, 1.1553965807, 0.4215162694, 1.1144150496]	1.23799	0.187526	0.0746135	1.1554	0.421516	1.11442
1154	1315	wz	cy_613229777_1864815878.wav	D:\hc--document\all text\P8_medical\thesis_dataset\use_wav_raw\613229777\1864815878.wav	0	3	[0.9638295174, 0.0983334929, 0.2399279177, 1.4670277834, 1.1837922335, 0.3661330938]	0.96383	0.0983335	0.239928	1.46703	1.18379	0.366133
1155	990	general	cy_721754683_3330997459.wav	D:\hc--document\all text\P8_medical\thesis_dataset\use_wav_raw\721754683\3330997459.wav	0	0	[0.5892950296, 0.8014217615, 1.2750452757, 0.1606936008, 0.3967972696, 0.3264735937]	0.589295	0.801422	1.27505	0.160694	0.396797	0.326474
1156	1108	general	dx_85603174_24487678.wav	D:\hc--document\all text\P8_medical\thesis_dataset\use_wav_raw\85603174\24487678.wav	0	0	[1.1968510151, 0.0, 0.331714958, 0.7621548772, 1.2513141632, 0.4360631704]	1.19685	0	0.331715	0.762155	1.25131	0.436063
1157	805	yl	cy_707067828_3013307644.wav	D:\hc--document\all text\P8_medical\thesis_dataset\use_wav_raw\707067828\3013307644.wav	0	5	[0.8725875616, 0.0490904897, 0.2309629172, 1.478233099, 1.2124247551, 0.3057635427]	0.872588	0.0490905	0.230963	1.47823	1.21242	0.305764
1158	1039	fn	cy_669509937_2198271170.wav	D:\hc--document\all text\P8_medical\thesis_dataset\use_wav_raw\669509937\2198271170.wav	0	1	[0.2072479278, 2.0761027336, 1.7048079967, 0.1404238939, 0.1849304289, 0.5554122329]	0.207248	2.0761	1.70481	0.140424	0.18493	0.555412
1159	1507	jd	cy_181548662_271162490.wav	D:\hc--document\all text\P8_medical\thesis_dataset\use_wav_raw\181548662\271162490.wav	0	2	[0.6664956808, 0.8026760221, 1.1575289965, 0.1933901608, 0.5627023578, 0.2658929527]	0.666496	0.802676	1.15753	0.19339	0.562702	0.265893
1160	430	general	dx_90207777_28730026.wav	D:\hc--document\all text\P8_medical\thesis_dataset\use_wav_raw\90207777\28730026.wav	0	0	[1.0392946005, 0.2932604551, 0.570766747, 0.3158553541, 0.4507035315, 1.010305047]	1.03929	0.29326	0.570767	0.315855	0.450704	1.01031
1161	221	wz	cy_620902729_1906355153.wav	D:\hc--document\all text\P8_medical\thesis_dataset\use_wav_raw\620902729\1906355153.wav	0	3	[1.0456237793, 0.3456929028, 0.6968362927, 0.2596599162, 1.3328008652, 0.0]	1.04562	0.345693	0.696836	0.25966	1.3328	0
1162	930	yl	dx_84208066_26746145.wav	D:\hc--document\all text\P8_medical\thesis_dataset\use_wav_raw\84208066\26746145.wav	0	5	[1.0148463249, 0.0437532514, 0.1881420463, 1.3758175373, 0.2063425183, 0.9868194461]	1.01485	0.0437533	0.188142	1.37582	0.206343	0.986819
1163	594	fn	cy_572039448_1648281872.wav	D:\hc--document\all text\P8_medical\thesis_dataset\use_wav_raw\572039448\1648281872.wav	0	1	[0.2633296847, 1.6998935938, 1.7294433117, 0.102344647, 0.3641598821, 0.3627168536]	0.26333	1.69989	1.72944	0.102345	0.36416	0.362717
1164	914	rouhe	cy_689378996_2623933842.wav	D:\hc--document\all text\P8_medical\thesis_dataset\use_wav_raw\689378996\2623933842.wav	0	4	[1.2264112234, 0.0457752496, 0.3755737543, 0.2463110387, 1.4671673775, 0.3102325499]	1.22641	0.0457752	0.375574	0.246311	1.46717	0.310233
1165	509	fn	cy_718616560_3258866283.wav	D:\hc--document\all text\P8_medical\thesis_dataset\use_wav_raw\718616560\3258866283.wav	0	1	[0.1936377585, 1.9475890398, 1.7196683884, 0.1424297541, 0.2160910964, 0.5195329785]	0.193638	1.94759	1.71967	0.14243	0.216091	0.519533
1166	683	general	dx_89138763_27559655.wav	D:\hc--document\all text\P8_medical\thesis_dataset\use_wav_raw\89138763\27559655.wav	0	0	[1.1742399931, 0.0, 0.298006326, 0.98608917, 0.7147651911, 0.7219262123]	1.17424	0	0.298006	0.986089	0.714765	0.721926
1167	404	general	cy_724063084_3384931700.wav	D:\hc--document\all text\P8_medical\thesis_dataset\use_wav_raw\724063084\3384931700.wav	0	0	[1.3074314594, 0.2179501802, 0.2858565152, 0.6969075799, 0.6497647166, 1.1015206575]	1.30743	0.21795	0.285857	0.696908	0.649765	1.10152
1168	102	fn	cy_723303797_3365998133.wav	D:\hc--document\all text\P8_medical\thesis_dataset\use_wav_raw\723303797\3365998133.wav	0	1	[0.4325623214, 1.6847943068, 1.5437226295, 0.1085832939, 0.3682709336, 0.3391655385]	0.432562	1.68479	1.54372	0.108583	0.368271	0.339166
1169	1397	jd	cy_669946934_2207299346.wav	D:\hc--document\all text\P8_medical\thesis_dataset\use_wav_raw\669946934\2207299346.wav	0	2	[0.437558949, 1.6371399164, 1.6620371342, 0.0872417688, 0.3800277114, 0.1874949634]	0.437559	1.63714	1.66204	0.0872418	0.380028	0.187495
1170	801	wz	cy_708966924_3051885838.wav	D:\hc--document\all text\P8_medical\thesis_dataset\use_wav_raw\708966924\3051885838.wav	0	3	[0.8867789507, 0.0640371665, 0.2366357595, 1.4585632086, 1.2585748434, 0.2379073799]	0.886779	0.0640372	0.236636	1.45856	1.25857	0.237907
1171	1532	wz	dx_91010479_30035181.wav	D:\hc--document\all text\P8_medical\thesis_dataset\use_wav_raw\91010479\30035181.wav	0	3	[1.0074875355, 0.0061937179, 0.2049585283, 1.3401303291, 0.889870584, 0.5145446062]	1.00749	0.00619372	0.204959	1.34013	0.889871	0.514545
1172	1134	jd	cy_672819337_2267102466.wav	D:\hc--document\all text\P8_medical\thesis_dataset\use_wav_raw\672819337\2267102466.wav	0	2	[0.502986908, 1.1313514709, 1.5136196613, 0.0994738415, 0.5239813924, 0.0511259809]	0.502987	1.13135	1.51362	0.0994738	0.523981	0.051126
1173	1755	rouhe	cy_629204206_1954972646.wav	D:\hc--document\all text\P8_medical\thesis_dataset\use_wav_raw\629204206\1954972646.wav	0	4	[0.5760556459, 1.2622640133, 1.4753541946, 0.1342950165, 0.5068052411, 0.1798556596]	0.576056	1.26226	1.47535	0.134295	0.506805	0.179856
1174	584	wz	dx_92831856_32377365.wav	D:\hc--document\all text\P8_medical\thesis_dataset\use_wav_raw\92831856\32377365.wav	0	3	[0.9395292401, 0.1031337306, 0.2204577625, 1.520994544, 0.9657178521, 0.5264088511]	0.939529	0.103134	0.220458	1.52099	0.965718	0.526409
1175	1742	yl	cy_686221397_2555346984.wav	D:\hc--document\all text\P8_medical\thesis_dataset\use_wav_raw\686221397\2555346984.wav	0	5	[1.2631499767, 0.040984042, 0.2271802276, 0.7736436129, 1.0931866169, 0.8213043809]	1.26315	0.040984	0.22718	0.773644	1.09319	0.821304
1176	933	jd	dx_90974198_29835539.wav	D:\hc--document\all text\P8_medical\thesis_dataset\use_wav_raw\90974198\29835539.wav	0	2	[0.3676252067, 1.6745655537, 1.7207978964, 0.1201675013, 0.3287136853, 0.3251922727]	0.367625	1.67457	1.7208	0.120168	0.328714	0.325192
1177	1526	fn	cy_586532898_1726435889.wav	D:\hc--document\all text\P8_medical\thesis_dataset\use_wav_raw\586532898\1726435889.wav	0	1	[0.4198748767, 1.7108287811, 1.4526669979, 0.211099267, 0.3703430295, 0.4519136548]	0.419875	1.71083	1.45267	0.211099	0.370343	0.451914
1178	1659	rouhe	cy_710183190_3076284524.wav	D:\hc--document\all text\P8_medical\thesis_dataset\use_wav_raw\710183190\3076284524.wav	0	4	[1.040119648, 0.0086002788, 0.4427935481, 0.6080185771, 1.5604360104, 0.2506560087]	1.04012	0.00860028	0.442794	0.608019	1.56044	0.250656
1179	1763	rouhe	cy_715835056_3192766977.wav	D:\hc--document\all text\P8_medical\thesis_dataset\use_wav_raw\715835056\3192766977.wav	0	4	[1.3833127022, 0.0, 0.3016651273, 0.2447454035, 1.3964190483, 0.2880094051]	1.38331	0	0.301665	0.244745	1.39642	0.288009
1180	861	yl	cy_718745476_3261258141.wav	D:\hc--document\all text\P8_medical\thesis_dataset\use_wav_raw\718745476\3261258141.wav	0	5	[0.7022403479, 0.8920034766, 0.9083781242, 0.2865734696, 0.2840072811, 0.956620574]	0.70224	0.892003	0.908378	0.286573	0.284007	0.956621
1181	1504	general	cy_615216822_1875785987.wav	D:\hc--document\all text\P8_medical\thesis_dataset\use_wav_raw\615216822\1875785987.wav	0	0	[0.3591889441, 1.7786098719, 1.6472425461, 0.0963790044, 0.1443761587, 0.3917758167]	0.359189	1.77861	1.64724	0.096379	0.144376	0.391776
1182	1616	jd	dx_90733956_29804464.wav	D:\hc--document\all text\P8_medical\thesis_dataset\use_wav_raw\90733956\29804464.wav	0	2	[0.3127643764, 1.5906865597, 1.7307680845, 0.0465667695, 0.3591971695, 0.2498741746]	0.312764	1.59069	1.73077	0.0465668	0.359197	0.249874
1183	1426	fn	dx_84331443_24085492.wav	D:\hc--document\all text\P8_medical\thesis_dataset\use_wav_raw\84331443\24085492.wav	0	1	[0.3556164801, 1.9116479158, 1.5032507181, 0.17019777, 0.1773758531, 0.6766957641]	0.355616	1.91165	1.50325	0.170198	0.177376	0.676696
1184	1106	fn	dx_75418281_21307366.wav	D:\hc--document\all text\P8_medical\thesis_dataset\use_wav_raw\75418281\21307366.wav	0	1	[0.2634937763, 1.7445533276, 1.8075003624, 0.0373046771, 0.2434805632, 0.3350271583]	0.263494	1.74455	1.8075	0.0373047	0.243481	0.335027
1185	236	wz	cy_564607727_1609425728.wav	D:\hc--document\all text\P8_medical\thesis_dataset\use_wav_raw\564607727\1609425728.wav	0	3	[0.9117720723, 0.0, 0.1942674369, 1.433925271, 1.0304735899, 0.3795922995]	0.911772	0	0.194267	1.43393	1.03047	0.379592
1186	1567	wz	cy_716533050_3210292872.wav	D:\hc--document\all text\P8_medical\thesis_dataset\use_wav_raw\716533050\3210292872.wav	0	3	[0.9744514823, 0.0985002965, 0.2934243679, 1.2729055882, 1.1338182688, 0.3466210663]	0.974451	0.0985003	0.293424	1.27291	1.13382	0.346621
1187	471	fn	cy_721243972_3319465837.wav	D:\hc--document\all text\P8_medical\thesis_dataset\use_wav_raw\721243972\3319465837.wav	0	1	[0.4670063853, 1.7215250731, 1.6215692759, 0.0572297946, 0.235802874, 0.367184341]	0.467006	1.72153	1.62157	0.0572298	0.235803	0.367184
1188	1165	jd	cy_683645685_2500263912.wav	D:\hc--document\all text\P8_medical\thesis_dataset\use_wav_raw\683645685\2500263912.wav	0	2	[0.2292550206, 1.790288806, 1.6631149054, 0.1059430987, 0.3658720553, 0.2421071529]	0.229255	1.79029	1.66311	0.105943	0.365872	0.242107
1189	1765	jd	cy_672687843_2264276250.wav	D:\hc--document\all text\P8_medical\thesis_dataset\use_wav_raw\672687843\2264276250.wav	0	2	[0.2422031611, 1.816422224, 1.714430213, 0.0800623819, 0.3053595424, 0.3171852827]	0.242203	1.81642	1.71443	0.0800624	0.30536	0.317185
1190	888	general	cy_723846719_3378958131.wav	D:\hc--document\all text\P8_medical\thesis_dataset\use_wav_raw\723846719\3378958131.wav	0	0	[1.225651145, 0.1554905176, 0.1666471809, 1.0467400551, 0.5067152381, 1.0277961493]	1.22565	0.155491	0.166647	1.04674	0.506715	1.0278
1191	373	yl	cy_723893268_3381157496.wav	D:\hc--document\all text\P8_medical\thesis_dataset\use_wav_raw\723893268\3381157496.wav	0	5	[1.1004697084, 0.1390478164, 0.4760067761, 0.3556698859, 0.4998152256, 0.8532060385]	1.10047	0.139048	0.476007	0.35567	0.499815	0.853206
1192	635	jd	cy_682783490_2480778922.wav	D:\hc--document\all text\P8_medical\thesis_dataset\use_wav_raw\682783490\2480778922.wav	0	2	[0.5595588088, 1.0621422529, 1.3923275471, 0.1757442653, 0.4338383675, 0.0638444647]	0.559559	1.06214	1.39233	0.175744	0.433838	0.0638445
1193	929	general	dx_61582697_22654257.wav	D:\hc--document\all text\P8_medical\thesis_dataset\use_wav_raw\61582697\22654257.wav	0	0	[1.1396365166, 0.0, 0.098340705, 1.259498477, 0.0944001973, 1.0531569719]	1.13964	0	0.0983407	1.2595	0.0944002	1.05316
1194	938	yl	cy_672008212_2251086562.wav	D:\hc--document\all text\P8_medical\thesis_dataset\use_wav_raw\672008212\2251086562.wav	0	5	[1.1688491106, 0.1812677532, 0.4953973889, 0.4038316309, 0.6271440983, 0.876565814]	1.16885	0.181268	0.495397	0.403832	0.627144	0.876566
1195	876	fn	cy_719267187_3273609161.wav	D:\hc--document\all text\P8_medical\thesis_dataset\use_wav_raw\719267187\3273609161.wav	0	1	[0.3935587704, 1.7931888103, 1.601913929, 0.1579065919, 0.3555378318, 0.4649254978]	0.393559	1.79319	1.60191	0.157907	0.355538	0.464925
1196	1683	jd	cy_673006328_2271080766.wav	D:\hc--document\all text\P8_medical\thesis_dataset\use_wav_raw\673006328\2271080766.wav	0	2	[0.3463281989, 1.6613379717, 1.7760329247, 0.0168811139, 0.2959758043, 0.2212670445]	0.346328	1.66134	1.77603	0.0168811	0.295976	0.221267
1197	1574	yl	cy_722876574_3357128298.wav	D:\hc--document\all text\P8_medical\thesis_dataset\use_wav_raw\722876574\3357128298.wav	0	5	[0.7631438971, 1.0827599764, 1.1047657728, 0.3070887327, 0.4902112484, 0.851472497]	0.763144	1.08276	1.10477	0.307089	0.490211	0.851472
1198	1708	general	cy_551034256_1542798407.wav	D:\hc--document\all text\P8_medical\thesis_dataset\use_wav_raw\551034256\1542798407.wav	0	0	[0.7295352221, 0.6375464201, 1.1365014315, 0.1756942719, 0.545478344, 0.0678768009]	0.729535	0.637546	1.1365	0.175694	0.545478	0.0678768
1199	1767	yl	cy_677970373_2376240012.wav	D:\hc--document\all text\P8_medical\thesis_dataset\use_wav_raw\677970373\2376240012.wav	0	5	[1.3828531504, 0.168103978, 0.2405934185, 0.6583863497, 0.4518211782, 1.1673127413]	1.38285	0.168104	0.240593	0.658386	0.451821	1.16731
1200	1297	wz	dx_87475575_25542698.wav	D:\hc--document\all text\P8_medical\thesis_dataset\use_wav_raw\87475575\25542698.wav	0	3	[0.894788146, 0.0290317107, 0.2042066753, 1.5471541882, 1.2017415762, 0.2692644298]	0.894788	0.0290317	0.204207	1.54715	1.20174	0.269264
1201	188	fn	cy_644888425_2033547593.wav	D:\hc--document\all text\P8_medical\thesis_dataset\use_wav_raw\644888425\2033547593.wav	0	1	[0.3836808205, 1.6715943813, 1.5038163662, 0.1552894115, 0.2664189041, 0.6770629287]	0.383681	1.67159	1.50382	0.155289	0.266419	0.677063
1202	1160	wz	cy_626746765_1936955525.wav	D:\hc--document\all text\P8_medical\thesis_dataset\use_wav_raw\626746765\1936955525.wav	0	3	[0.9716826677, 0.0608893037, 0.3363025486, 1.0953483582, 1.3823994398, 0.2382203788]	0.971683	0.0608893	0.336303	1.09535	1.3824	0.23822
1203	1595	jd	cy_712114213_3112972170.wav	D:\hc--document\all text\P8_medical\thesis_dataset\use_wav_raw\712114213\3112972170.wav	0	2	[0.5551842451, 0.9150505662, 1.3413698673, 0.1444101036, 0.3846560419, 0.0323594436]	0.555184	0.915051	1.34137	0.14441	0.384656	0.0323594
1204	641	fn	cy_670155607_2211597044.wav	D:\hc--document\all text\P8_medical\thesis_dataset\use_wav_raw\670155607\2211597044.wav	0	1	[0.2475942075, 1.9641017914, 1.7069286108, 0.0798680857, 0.2911992371, 0.2857195139]	0.247594	1.9641	1.70693	0.0798681	0.291199	0.28572
1205	445	jd	cy_714854210_3170513667.wav	D:\hc--document\all text\P8_medical\thesis_dataset\use_wav_raw\714854210\3170513667.wav	0	2	[1.2016496658, 0.0684374273, 0.432633847, 0.2627849877, 1.4534164667, 0.337648809]	1.20165	0.0684374	0.432634	0.262785	1.45342	0.337649
1206	300	jd	cy_637523499_1995721238.wav	D:\hc--document\all text\P8_medical\thesis_dataset\use_wav_raw\637523499\1995721238.wav	0	2	[0.3150918186, 1.6856485605, 1.674120307, 0.161510855, 0.2172169834, 0.2789073884]	0.315092	1.68565	1.67412	0.161511	0.217217	0.278907
1207	451	wz	cy_677136812_2358228506.wav	D:\hc--document\all text\P8_medical\thesis_dataset\use_wav_raw\677136812\2358228506.wav	0	3	[0.9695258141, 0.0285632312, 0.2273489088, 1.3569667339, 0.8752616048, 0.4705567062]	0.969526	0.0285632	0.227349	1.35697	0.875262	0.470557
1208	1540	jd	dx_82455343_23439286.wav	D:\hc--document\all text\P8_medical\thesis_dataset\use_wav_raw\82455343\23439286.wav	0	2	[0.5429323912, 1.2600843906, 1.2807825804, 0.216616258, 0.270193696, 0.7028374672]	0.542932	1.26008	1.28078	0.216616	0.270194	0.702837
1209	1681	yl	cy_689280804_2621747618.wav	D:\hc--document\all text\P8_medical\thesis_dataset\use_wav_raw\689280804\2621747618.wav	0	5	[1.1319127083, 0.2802625597, 0.5087382793, 0.2736415863, 0.7251489162, 0.8487925529]	1.13191	0.280263	0.508738	0.273642	0.725149	0.848793
1210	633	rouhe	cy_710974024_3092341626.wav	D:\hc--document\all text\P8_medical\thesis_dataset\use_wav_raw\710974024\3092341626.wav	0	4	[1.1227296591, 0.1263560206, 0.4142428041, 0.4889734685, 1.5972105265, 0.2759694457]	1.12273	0.126356	0.414243	0.488973	1.59721	0.275969
1211	601	rouhe	cy_678300425_2383335418.wav	D:\hc--document\all text\P8_medical\thesis_dataset\use_wav_raw\678300425\2383335418.wav	0	4	[1.08713305, 0.2612287998, 0.4925971925, 0.291555196, 0.8809788227, 0.9047127962]	1.08713	0.261229	0.492597	0.291555	0.880979	0.904713
1212	1757	yl	cy_718701765_3260385996.wav	D:\hc--document\all text\P8_medical\thesis_dataset\use_wav_raw\718701765\3260385996.wav	0	5	[1.1743686199, 0.1441238374, 0.1551370621, 0.9541759491, 0.3445000947, 1.2065778971]	1.17437	0.144124	0.155137	0.954176	0.3445	1.20658
1213	1079	general	cy_596468032_1778099351.wav	D:\hc--document\all text\P8_medical\thesis_dataset\use_wav_raw\596468032\1778099351.wav	0	0	[1.1435707808, 0.2359199375, 0.3694505394, 0.4802728295, 0.3979184926, 1.0101451874]	1.14357	0.23592	0.369451	0.480273	0.397918	1.01015
1214	329	yl	dx_65502134_18177662.wav	D:\hc--document\all text\P8_medical\thesis_dataset\use_wav_raw\65502134\18177662.wav	0	5	[1.1179068089, 0.0104294084, 0.2267764062, 1.0581758022, 0.8558525443, 0.9081066847]	1.11791	0.0104294	0.226776	1.05818	0.855853	0.908107
1215	953	yl	cy_708791972_3048326630.wav	D:\hc--document\all text\P8_medical\thesis_dataset\use_wav_raw\708791972\3048326630.wav	0	5	[0.8757086396, 0.4420525432, 0.7922050953, 0.3008601665, 0.407078594, 0.7656728625]	0.875709	0.442053	0.792205	0.30086	0.407079	0.765673
1216	1721	wz	cy_716801305_3217187128.wav	D:\hc--document\all text\P8_medical\thesis_dataset\use_wav_raw\716801305\3217187128.wav	0	3	[0.9948895574, 0.0403058603, 0.3016270399, 1.3486046791, 0.8855930567, 0.4973132908]	0.99489	0.0403059	0.301627	1.3486	0.885593	0.497313
1217	1299	jd	cy_677408342_2364148696.wav	D:\hc--document\all text\P8_medical\thesis_dataset\use_wav_raw\677408342\2364148696.wav	0	2	[1.0627824068, 0.0, 0.318598181, 1.0579427481, 1.1618618965, 0.3653149009]	1.06278	0	0.318598	1.05794	1.16186	0.365315
1218	626	jd	cy_717322282_3229520391.wav	D:\hc--document\all text\P8_medical\thesis_dataset\use_wav_raw\717322282\3229520391.wav	0	2	[0.5967977047, 1.0484411716, 1.3739460707, 0.2053487152, 0.2100396156, 0.2955206037]	0.596798	1.04844	1.37395	0.205349	0.21004	0.295521
1219	1768	general	dx_90859767_29859178.wav	D:\hc--document\all text\P8_medical\thesis_dataset\use_wav_raw\90859767\29859178.wav	0	0	[1.0586372614, 0.1734067798, 0.5710990429, 0.2792764604, 0.9524404407, 0.5438394547]	1.05864	0.173407	0.571099	0.279276	0.95244	0.543839
1220	619	rouhe	cy_693594566_2713338546.wav	D:\hc--document\all text\P8_medical\thesis_dataset\use_wav_raw\693594566\2713338546.wav	0	4	[1.1974653006, 0.1117090359, 0.2798398137, 0.9694517255, 1.4945700169, 0.4642086029]	1.19747	0.111709	0.27984	0.969452	1.49457	0.464209
1221	172	general	cy_704681116_2957000308.wav	D:\hc--document\all text\P8_medical\thesis_dataset\use_wav_raw\704681116\2957000308.wav	0	0	[0.6839703321, 0.8780016303, 1.142698288, 0.2167143524, 0.3152195811, 0.3463981748]	0.68397	0.878002	1.1427	0.216714	0.31522	0.346398
1222	1712	fn	cy_679947563_2419428242.wav	D:\hc--document\all text\P8_medical\thesis_dataset\use_wav_raw\679947563\2419428242.wav	0	1	[0.3917396665, 1.6181334257, 1.4530440569, 0.2022771537, 0.2753055096, 0.7254140377]	0.39174	1.61813	1.45304	0.202277	0.275306	0.725414
1223	314	general	dx_90129421_28839036.wav	D:\hc--document\all text\P8_medical\thesis_dataset\use_wav_raw\90129421\28839036.wav	0	0	[0.2551192045, 1.8606848717, 1.6353372335, 0.1581324339, 0.2043192685, 0.4582382441]	0.255119	1.86068	1.63534	0.158132	0.204319	0.458238
1224	587	yl	cy_581106709_1697328830.wav	D:\hc--document\all text\P8_medical\thesis_dataset\use_wav_raw\581106709\1697328830.wav	0	5	[1.0924668312, 0.4328272045, 0.3521421552, 0.7111620307, 0.2274638414, 1.5342005491]	1.09247	0.432827	0.352142	0.711162	0.227464	1.5342
1225	1749	yl	dx_80593887_22910369.wav	D:\hc--document\all text\P8_medical\thesis_dataset\use_wav_raw\80593887\22910369.wav	0	5	[1.0758293867, 0.3930067122, 0.5447624922, 0.3988833129, 0.1747516841, 1.1577211618]	1.07583	0.393007	0.544762	0.398883	0.174752	1.15772
1226	1096	jd	dx_83989161_30422067.wav	D:\hc--document\all text\P8_medical\thesis_dataset\use_wav_raw\83989161\30422067.wav	0	2	[0.3712711334, 1.6573160887, 1.6894834042, 0.0639191717, 0.3640834987, 0.2668494582]	0.371271	1.65732	1.68948	0.0639192	0.364083	0.266849
1227	322	general	cy_683452542_2495380286.wav	D:\hc--document\all text\P8_medical\thesis_dataset\use_wav_raw\683452542\2495380286.wav	0	0	[1.153861165, 0.1846890897, 0.5284661055, 0.2633249164, 0.4821875095, 0.7927544713]	1.15386	0.184689	0.528466	0.263325	0.482188	0.792754
1228	1204	fn	dx_91083105_30438998.wav	D:\hc--document\all text\P8_medical\thesis_dataset\use_wav_raw\91083105\30438998.wav	0	1	[0.3331740499, 1.7275183201, 1.6719989777, 0.0502587631, 0.206977576, 0.3245887756]	0.333174	1.72752	1.672	0.0502588	0.206978	0.324589
1229	1331	general	dx_75938800_21497126.wav	D:\hc--document\all text\P8_medical\thesis_dataset\use_wav_raw\75938800\21497126.wav	0	0	[0.6672617793, 1.1787291765, 1.1501175165, 0.2694165111, 0.4618560374, 0.9757192135]	0.667262	1.17873	1.15012	0.269417	0.461856	0.975719
1230	1725	yl	dx_91143566_30161620.wav	D:\hc--document\all text\P8_medical\thesis_dataset\use_wav_raw\91143566\30161620.wav	0	5	[1.1303042173, 0.8072434664, 0.3658614159, 0.7595332861, 0.4792897105, 1.6124595404]	1.1303	0.807243	0.365861	0.759533	0.47929	1.61246
1231	1662	wz	cy_669942339_2207223958.wav	D:\hc--document\all text\P8_medical\thesis_dataset\use_wav_raw\669942339\2207223958.wav	0	3	[0.8895605206, 0.0381636769, 0.2697814405, 1.4108505249, 1.1150102615, 0.4568949044]	0.889561	0.0381637	0.269781	1.41085	1.11501	0.456895
1232	492	wz	cy_715063483_3176330758.wav	D:\hc--document\all text\P8_medical\thesis_dataset\use_wav_raw\715063483\3176330758.wav	0	3	[1.1896952391, 0.1140213534, 0.0982863232, 1.1981310844, 0.4278083146, 1.0470534563]	1.1897	0.114021	0.0982863	1.19813	0.427808	1.04705
1233	634	wz	cy_698872986_2826146384.wav	D:\hc--document\all text\P8_medical\thesis_dataset\use_wav_raw\698872986\2826146384.wav	0	3	[1.0413458347, 0.1551371813, 0.2735378146, 1.3486258984, 1.3168904781, 0.2966707647]	1.04135	0.155137	0.273538	1.34863	1.31689	0.296671
1234	419	yl	cy_704511332_2953177354.wav	D:\hc--document\all text\P8_medical\thesis_dataset\use_wav_raw\704511332\2953177354.wav	0	5	[0.8257910609, 0.7015503645, 0.7459748387, 0.3149256706, 0.3166144788, 1.1923434734]	0.825791	0.70155	0.745975	0.314926	0.316614	1.19234
1235	956	rouhe	cy_721195049_3319236364.wav	D:\hc--document\all text\P8_medical\thesis_dataset\use_wav_raw\721195049\3319236364.wav	0	4	[1.2069437504, 0.0012572866, 0.4033603072, 0.3173169792, 1.4006513357, 0.2897539735]	1.20694	0.00125729	0.40336	0.317317	1.40065	0.289754
1236	1010	rouhe	dx_91853309_31131634.wav	D:\hc--document\all text\P8_medical\thesis_dataset\use_wav_raw\91853309\31131634.wav	0	4	[0.9669691324, 0.0490803942, 0.4446275532, 0.5841456652, 1.378262639, 0.3274269998]	0.966969	0.0490804	0.444628	0.584146	1.37826	0.327427
1237	1724	wz	dx_90434981_29615347.wav	D:\hc--document\all text\P8_medical\thesis_dataset\use_wav_raw\90434981\29615347.wav	0	3	[0.8717626333, 0.0117394682, 0.1852687448, 1.5260746479, 1.1567659378, 0.2923253179]	0.871763	0.0117395	0.185269	1.52607	1.15677	0.292325
1238	1422	wz	cy_667542677_2158210770.wav	D:\hc--document\all text\P8_medical\thesis_dataset\use_wav_raw\667542677\2158210770.wav	0	3	[1.2332757711, 0.0463126451, 0.3168412149, 0.4703435004, 1.294380784, 0.3993502855]	1.23328	0.0463126	0.316841	0.470344	1.29438	0.39935
1239	153	jd	dx_90859944_29858738.wav	D:\hc--document\all text\P8_medical\thesis_dataset\use_wav_raw\90859944\29858738.wav	0	2	[0.1840319186, 1.8976054192, 1.7093923092, 0.0764892995, 0.2318183184, 0.4621432126]	0.184032	1.89761	1.70939	0.0764893	0.231818	0.462143
1240	310	fn	dx_85397261_24466212.wav	D:\hc--document\all text\P8_medical\thesis_dataset\use_wav_raw\85397261\24466212.wav	0	1	[0.8018262386, 0.8436181545, 0.9440553784, 0.2794651687, 0.2937915921, 0.9565863609]	0.801826	0.843618	0.944055	0.279465	0.293792	0.956586
1241	955	rouhe	cy_650232148_2061582893.wav	D:\hc--document\all text\P8_medical\thesis_dataset\use_wav_raw\650232148\2061582893.wav	0	4	[1.1837781668, 0.0723757297, 0.4430834651, 0.182206437, 1.0071864128, 0.5478610396]	1.18378	0.0723757	0.443083	0.182206	1.00719	0.547861
1242	435	rouhe	cy_671718212_2243989624.wav	D:\hc--document\all text\P8_medical\thesis_dataset\use_wav_raw\671718212\2243989624.wav	0	4	[0.9277197123, 0.0976955816, 0.2503085732, 1.2963728905, 1.2730534077, 0.2457029521]	0.92772	0.0976956	0.250309	1.29637	1.27305	0.245703
1243	983	rouhe	cy_695405630_2751240674.wav	D:\hc--document\all text\P8_medical\thesis_dataset\use_wav_raw\695405630\2751240674.wav	0	4	[1.1536278725, 0.1212420315, 0.4851692617, 0.1351360679, 1.3447538614, 0.292773813]	1.15363	0.121242	0.485169	0.135136	1.34475	0.292774
1244	309	yl	cy_571857681_1647865967.wav	D:\hc--document\all text\P8_medical\thesis_dataset\use_wav_raw\571857681\1647865967.wav	0	5	[1.0575544834, 0.2526846826, 0.557436049, 0.3633754551, 0.2324424684, 1.1415339708]	1.05755	0.252685	0.557436	0.363375	0.232442	1.14153
1245	764	jd	cy_621893319_1911419867.wav	D:\hc--document\all text\P8_medical\thesis_dataset\use_wav_raw\621893319\1911419867.wav	0	2	[0.307231307, 1.8069998026, 1.7043442726, 0.089624159, 0.4195544422, 0.2189139873]	0.307231	1.807	1.70434	0.0896242	0.419554	0.218914
1246	1284	fn	cy_633447214_1974237542.wav	D:\hc--document\all text\P8_medical\thesis_dataset\use_wav_raw\633447214\1974237542.wav	0	1	[0.3090437651, 1.8184856176, 1.6698045731, 0.1585951447, 0.4817979932, 0.3256082535]	0.309044	1.81849	1.6698	0.158595	0.481798	0.325608
1247	1365	wz	cy_699242112_2834421362.wav	D:\hc--document\all text\P8_medical\thesis_dataset\use_wav_raw\699242112\2834421362.wav	0	3	[1.0185812712, 0.0107503999, 0.1348866671, 1.4222601652, 0.4535858929, 0.861854434]	1.01858	0.0107504	0.134887	1.42226	0.453586	0.861854
1248	1334	yl	cy_677486924_2365810962.wav	D:\hc--document\all text\P8_medical\thesis_dataset\use_wav_raw\677486924\2365810962.wav	0	5	[1.0482764244, 0.455889374, 0.4297599196, 0.4038337469, 0.173947826, 1.2933882475]	1.04828	0.455889	0.42976	0.403834	0.173948	1.29339
1249	1260	general	dx_84253870_26973819.wav	D:\hc--document\all text\P8_medical\thesis_dataset\use_wav_raw\84253870\26973819.wav	0	0	[1.0843567848, 0.2814688385, 0.382060796, 0.6043150425, 0.36391747, 1.1834409237]	1.08436	0.281469	0.382061	0.604315	0.363917	1.18344
1250	95	general	cy_722736166_3352048667.wav	D:\hc--document\all text\P8_medical\thesis_dataset\use_wav_raw\722736166\3352048667.wav	0	0	[1.0244073868, 0.1131599694, 0.3042805195, 1.2482869625, 0.7661452889, 0.6989636421]	1.02441	0.11316	0.304281	1.24829	0.766145	0.698964
1251	165	yl	cy_712861709_3127785416.wav	D:\hc--document\all text\P8_medical\thesis_dataset\use_wav_raw\712861709\3127785416.wav	0	5	[1.0519962311, 0.2295864969, 0.5846041441, 0.2511799037, 0.6662604809, 0.7885994911]	1.052	0.229586	0.584604	0.25118	0.66626	0.788599
1252	477	rouhe	cy_641942975_2019216026.wav	D:\hc--document\all text\P8_medical\thesis_dataset\use_wav_raw\641942975\2019216026.wav	0	4	[1.165345192, 0.0, 0.3708700538, 0.9975243211, 1.2662789822, 0.2149281502]	1.16535	0	0.37087	0.997524	1.26628	0.214928
1253	1013	jd	cy_684814193_2525541348.wav	D:\hc--document\all text\P8_medical\thesis_dataset\use_wav_raw\684814193\2525541348.wav	0	2	[0.6041360497, 1.2699269056, 1.3769754171, 0.1433609873, 0.5110191703, 0.3414052725]	0.604136	1.26993	1.37698	0.143361	0.511019	0.341405
1254	921	wz	cy_652947031_2076370655.wav	D:\hc--document\all text\P8_medical\thesis_dataset\use_wav_raw\652947031\2076370655.wav	0	3	[1.2113037109, 0.269651264, 0.2877208591, 0.7168352008, 0.4463674426, 1.1798018217]	1.2113	0.269651	0.287721	0.716835	0.446367	1.1798
1255	924	yl	cy_613989918_1869067439.wav	D:\hc--document\all text\P8_medical\thesis_dataset\use_wav_raw\613989918\1869067439.wav	0	5	[1.0919059515, 0.4279025197, 0.5399728417, 0.3836443126, 0.4937571883, 1.0560246706]	1.09191	0.427903	0.539973	0.383644	0.493757	1.05602
1256	490	wz	cy_701576894_2886296734.wav	D:\hc--document\all text\P8_medical\thesis_dataset\use_wav_raw\701576894\2886296734.wav	0	3	[0.9855470061, 0.0560685098, 0.2365580052, 1.2205308676, 0.5863609314, 1.0222616196]	0.985547	0.0560685	0.236558	1.22053	0.586361	1.02226
1257	1029	jd	cy_722498843_3347259257.wav	D:\hc--document\all text\P8_medical\thesis_dataset\use_wav_raw\722498843\3347259257.wav	0	2	[0.9054208398, 0.0883548334, 0.2867038548, 1.4983490705, 0.8857106566, 0.3683388531]	0.905421	0.0883548	0.286704	1.49835	0.885711	0.368339
1258	1517	yl	cy_711136555_3095281207.wav	D:\hc--document\all text\P8_medical\thesis_dataset\use_wav_raw\711136555\3095281207.wav	0	5	[0.711102128, 1.0901978016, 0.8434269428, 0.4262023568, 0.3348311782, 1.3916745186]	0.711102	1.0902	0.843427	0.426202	0.334831	1.39167
1259	1781	rouhe	cy_720083787_3292940257.wav	D:\hc--document\all text\P8_medical\thesis_dataset\use_wav_raw\720083787\3292940257.wav	0	4	[1.1473479271, 0.2269124687, 0.319226563, 0.6343798637, 1.4922375679, 0.4607293606]	1.14735	0.226912	0.319227	0.63438	1.49224	0.460729
1260	672	jd	cy_605962806_1826948153.wav	D:\hc--document\all text\P8_medical\thesis_dataset\use_wav_raw\605962806\1826948153.wav	0	2	[0.484618336, 1.6240729094, 1.4935133457, 0.2390440404, 0.3247375786, 0.6426792145]	0.484618	1.62407	1.49351	0.239044	0.324738	0.642679
1261	361	yl	cy_709201170_3056683936.wav	D:\hc--document\all text\P8_medical\thesis_dataset\use_wav_raw\709201170\3056683936.wav	0	5	[1.1134780645, 0.6075345278, 0.3299463987, 0.7483868599, 0.4107050896, 1.583586216]	1.11348	0.607535	0.329946	0.748387	0.410705	1.58359
1262	573	rouhe	cy_711427006_3100769570.wav	D:\hc--document\all text\P8_medical\thesis_dataset\use_wav_raw\711427006\3100769570.wav	0	4	[1.2561615705, 0.1297481209, 0.423899889, 0.4557928145, 1.0594499111, 0.630614996]	1.25616	0.129748	0.4239	0.455793	1.05945	0.630615
1263	1377	rouhe	cy_717442225_3232296003.wav	D:\hc--document\all text\P8_medical\thesis_dataset\use_wav_raw\717442225\3232296003.wav	0	4	[1.1571792364, 0.0795303285, 0.3043507636, 1.031894207, 1.3844147921, 0.4678854942]	1.15718	0.0795303	0.304351	1.03189	1.38441	0.467885
1264	985	fn	cy_697586250_2797394066.wav	D:\hc--document\all text\P8_medical\thesis_dataset\use_wav_raw\697586250\2797394066.wav	0	1	[0.2222631574, 1.9284853935, 1.7188131809, 0.088670224, 0.159543097, 0.5276711583]	0.222263	1.92849	1.71881	0.0886702	0.159543	0.527671
1265	551	yl	dx_89776229_29748117.wav	D:\hc--document\all text\P8_medical\thesis_dataset\use_wav_raw\89776229\29748117.wav	0	5	[1.1441622972, 0.3707357049, 0.4014518857, 0.5460948348, 0.4292797744, 1.3130015135]	1.14416	0.370736	0.401452	0.546095	0.42928	1.313
1266	1629	jd	cy_680348569_2428394318.wav	D:\hc--document\all text\P8_medical\thesis_dataset\use_wav_raw\680348569\2428394318.wav	0	2	[0.85825032, 0.0887057483, 0.3061202765, 1.3790502548, 1.3199117184, 0.2808059752]	0.85825	0.0887057	0.30612	1.37905	1.31991	0.280806
1267	1347	rouhe	cy_717424125_3230769772.wav	D:\hc--document\all text\P8_medical\thesis_dataset\use_wav_raw\717424125\3230769772.wav	0	4	[0.9681489468, 0.0741207153, 0.2486957312, 1.4646853209, 1.2432171106, 0.305868566]	0.968149	0.0741207	0.248696	1.46469	1.24322	0.305869
1268	1269	jd	cy_680498847_2431769956.wav	D:\hc--document\all text\P8_medical\thesis_dataset\use_wav_raw\680498847\2431769956.wav	0	2	[0.4144892991, 1.5470199585, 1.640571475, 0.1178225651, 0.4248865843, 0.1669202596]	0.414489	1.54702	1.64057	0.117823	0.424887	0.16692
1269	327	fn	dx_89983548_28624408.wav	D:\hc--document\all text\P8_medical\thesis_dataset\use_wav_raw\89983548\28624408.wav	0	1	[0.1794845015, 2.0510492325, 1.7240384817, 0.0407893099, 0.2138250768, 0.4290612042]	0.179485	2.05105	1.72404	0.0407893	0.213825	0.429061
1270	813	general	cy_703958914_2941481092.wav	D:\hc--document\all text\P8_medical\thesis_dataset\use_wav_raw\703958914\2941481092.wav	0	0	[1.2750964165, 0.1699893624, 0.2704679668, 0.6809443831, 1.3946589231, 0.3620530665]	1.2751	0.169989	0.270468	0.680944	1.39466	0.362053
1271	130	jd	dx_32322379_9599236.wav	D:\hc--document\all text\P8_medical\thesis_dataset\use_wav_raw\32322379\9599236.wav	0	2	[0.3396854401, 1.7381118536, 1.6775022745, 0.0819869339, 0.3012884259, 0.3409914374]	0.339685	1.73811	1.6775	0.0819869	0.301288	0.340991
1272	743	wz	cy_697975400_2807430946.wav	D:\hc--document\all text\P8_medical\thesis_dataset\use_wav_raw\697975400\2807430946.wav	0	3	[0.6686760783, 0.8388195634, 1.1669659615, 0.1503185034, 0.6668778062, 0.0711445063]	0.668676	0.83882	1.16697	0.150319	0.666878	0.0711445
1273	1346	rouhe	cy_679294074_2404969368.wav	D:\hc--document\all text\P8_medical\thesis_dataset\use_wav_raw\679294074\2404969368.wav	0	4	[1.0797650814, 0.0824510008, 0.5242435336, 0.2223035693, 1.3527374268, 0.3730410635]	1.07977	0.082451	0.524244	0.222304	1.35274	0.373041
1274	1719	wz	dx_87076311_26505907.wav	D:\hc--document\all text\P8_medical\thesis_dataset\use_wav_raw\87076311\26505907.wav	0	3	[1.1848161221, 0.0851934478, 0.1955415756, 1.1262809038, 0.6709330082, 0.8679846525]	1.18482	0.0851934	0.195542	1.12628	0.670933	0.867985
1275	1671	fn	cy_159393055_216764174.wav	D:\hc--document\all text\P8_medical\thesis_dataset\use_wav_raw\159393055\216764174.wav	0	1	[0.6183816195, 1.5426690578, 1.4434896708, 0.128817901, 0.4035477638, 0.1839644611]	0.618382	1.54267	1.44349	0.128818	0.403548	0.183964
1276	1736	wz	dx_92807395_32234271.wav	D:\hc--document\all text\P8_medical\thesis_dataset\use_wav_raw\92807395\32234271.wav	1	3	[1.2103973627, 0.0955337584, 0.3252204061, 0.6111099124, 1.2994885445, 0.3503171504]	1.2104	0.0955338	0.32522	0.61111	1.29949	0.350317
1277	479	rouhe	cy_717159506_3224846722.wav	D:\hc--document\all text\P8_medical\thesis_dataset\use_wav_raw\717159506\3224846722.wav	1	4	[1.2350445986, 0.0211268477, 0.4168484807, 0.2270498872, 1.4018768072, 0.2911958694]	1.23504	0.0211268	0.416848	0.22705	1.40188	0.291196
1278	1657	rouhe	cy_716723857_3215984805.wav	D:\hc--document\all text\P8_medical\thesis_dataset\use_wav_raw\716723857\3215984805.wav	1	4	[0.9199714065, 0.0496307462, 0.2754903436, 1.1792286634, 1.4307420254, 0.3234397173]	0.919971	0.0496307	0.27549	1.17923	1.43074	0.32344
1279	1308	general	cy_717897481_3242510064.wav	D:\hc--document\all text\P8_medical\thesis_dataset\use_wav_raw\717897481\3242510064.wav	1	0	[1.0425605774, 0.274857372, 0.5445377231, 0.327593565, 0.4034299552, 0.9824274182]	1.04256	0.274857	0.544538	0.327594	0.40343	0.982427
1280	438	jd	cy_219336173_362285231.wav	D:\hc--document\all text\P8_medical\thesis_dataset\use_wav_raw\219336173\362285231.wav	1	2	[0.5877351761, 1.3198533058, 1.4733687639, 0.1098463833, 0.5067142844, 0.0984012336]	0.587735	1.31985	1.47337	0.109846	0.506714	0.0984012
1281	1180	general	cy_683610675_2498906886.wav	D:\hc--document\all text\P8_medical\thesis_dataset\use_wav_raw\683610675\2498906886.wav	1	0	[1.2600492239, 0.2936597764, 0.2464275658, 0.8610079885, 0.4508758485, 1.2631140947]	1.26005	0.29366	0.246428	0.861008	0.450876	1.26311
1282	103	jd	cy_694860638_2739807140.wav	D:\hc--document\all text\P8_medical\thesis_dataset\use_wav_raw\694860638\2739807140.wav	1	2	[0.9736881256, 0.0666473657, 0.4111104906, 1.1741997004, 1.503911972, 0.279193908]	0.973688	0.0666474	0.41111	1.1742	1.50391	0.279194
1283	632	fn	dx_91664292_31448578.wav	D:\hc--document\all text\P8_medical\thesis_dataset\use_wav_raw\91664292\31448578.wav	1	1	[0.3041136563, 1.7160493135, 1.6177041531, 0.1191951409, 0.3277645707, 0.4280493259]	0.304114	1.71605	1.6177	0.119195	0.327765	0.428049
1284	716	wz	cy_676483139_2344285508.wav	D:\hc--document\all text\P8_medical\thesis_dataset\use_wav_raw\676483139\2344285508.wav	1	3	[1.1911921501, 0.2892739475, 0.2229183465, 0.8293609023, 0.4524598718, 1.2437485456]	1.19119	0.289274	0.222918	0.829361	0.45246	1.24375
1285	1127	wz	cy_700637902_2865610430.wav	D:\hc--document\all text\P8_medical\thesis_dataset\use_wav_raw\700637902\2865610430.wav	1	3	[0.8584638238, 0.0538883358, 0.2479146272, 1.4777393341, 1.312274456, 0.2914766967]	0.858464	0.0538883	0.247915	1.47774	1.31227	0.291477
1286	1620	wz	cy_694934664_2741387772.wav	D:\hc--document\all text\P8_medical\thesis_dataset\use_wav_raw\694934664\2741387772.wav	1	3	[1.0609637499, 0.0, 0.1805296242, 1.3224873543, 0.6183478236, 0.8742586374]	1.06096	0	0.18053	1.32249	0.618348	0.874259
1287	239	general	cy_675168465_2317117152.wav	D:\hc--document\all text\P8_medical\thesis_dataset\use_wav_raw\675168465\2317117152.wav	1	0	[0.8941662312, 0.8115119338, 0.9284505844, 0.3452122509, 0.5538262129, 1.050583601]	0.894166	0.811512	0.928451	0.345212	0.553826	1.05058
1288	506	general	dx_92015742_30982248.wav	D:\hc--document\all text\P8_medical\thesis_dataset\use_wav_raw\92015742\30982248.wav	1	0	[0.7463054657, 0.557698369, 1.0590174198, 0.1915826499, 0.865014255, 0.1684037149]	0.746305	0.557698	1.05902	0.191583	0.865014	0.168404
1289	993	fn	dx_87471331_25517545.wav	D:\hc--document\all text\P8_medical\thesis_dataset\use_wav_raw\87471331\25517545.wav	1	1	[0.2106023729, 1.9714423418, 1.7279840708, 0.1141128168, 0.2672110796, 0.4760881662]	0.210602	1.97144	1.72798	0.114113	0.267211	0.476088
1290	1685	wz	cy_724193909_3387786077.wav	D:\hc--document\all text\P8_medical\thesis_dataset\use_wav_raw\724193909\3387786077.wav	1	3	[1.0024623871, 0.1136447415, 0.2880226374, 1.3481647968, 1.3263671398, 0.3079329133]	1.00246	0.113645	0.288023	1.34816	1.32637	0.307933
1291	1586	rouhe	cy_724659991_3399195822.wav	D:\hc--document\all text\P8_medical\thesis_dataset\use_wav_raw\724659991\3399195822.wav	1	4	[1.333733201, 0.0134907346, 0.3058075011, 0.575492382, 0.7631651759, 0.8897489309]	1.33373	0.0134907	0.305808	0.575492	0.763165	0.889749
1292	991	general	cy_714913372_3172061890.wav	D:\hc--document\all text\P8_medical\thesis_dataset\use_wav_raw\714913372\3172061890.wav	1	0	[1.0684058666, 0.2424686849, 0.3675915003, 0.8206478953, 0.4247424901, 1.1236566305]	1.06841	0.242469	0.367592	0.820648	0.424742	1.12366
1293	1030	fn	cy_667698226_2161364434.wav	D:\hc--document\all text\P8_medical\thesis_dataset\use_wav_raw\667698226\2161364434.wav	1	1	[0.5228798389, 1.6300090551, 1.517113328, 0.2398144454, 0.3743370771, 0.3651692569]	0.52288	1.63001	1.51711	0.239814	0.374337	0.365169
1294	1673	wz	dx_46076054_11789250.wav	D:\hc--document\all text\P8_medical\thesis_dataset\use_wav_raw\46076054\11789250.wav	1	3	[1.1744308472, 0.2851687372, 0.2167806923, 1.1949429512, 0.5609955192, 1.1510907412]	1.17443	0.285169	0.216781	1.19494	0.560996	1.15109
1295	802	general	cy_716290101_3204045972.wav	D:\hc--document\all text\P8_medical\thesis_dataset\use_wav_raw\716290101\3204045972.wav	1	0	[0.7976074219, 0.6335902214, 1.0389336348, 0.2904164791, 0.7839380503, 0.0]	0.797607	0.63359	1.03893	0.290416	0.783938	0
1296	523	rouhe	cy_718008103_3244890436.wav	D:\hc--document\all text\P8_medical\thesis_dataset\use_wav_raw\718008103\3244890436.wav	1	4	[1.2063206434, 0.0, 0.4529026151, 0.2312008888, 1.4676470757, 0.3156381547]	1.20632	0	0.452903	0.231201	1.46765	0.315638
1297	866	general	dx_82522218_23533257.wav	D:\hc--document\all text\P8_medical\thesis_dataset\use_wav_raw\82522218\23533257.wav	1	0	[1.2138314247, 0.1776825935, 0.3823671043, 0.6892047524, 0.7179949284, 1.0554945469]	1.21383	0.177683	0.382367	0.689205	0.717995	1.05549
1298	1129	fn	cy_672497485_2260334802.wav	D:\hc--document\all text\P8_medical\thesis_dataset\use_wav_raw\672497485\2260334802.wav	1	1	[0.3155292571, 1.7404601574, 1.7230323553, 0.050515946, 0.3015350997, 0.2306839973]	0.315529	1.74046	1.72303	0.0505159	0.301535	0.230684
1299	517	general	cy_704657870_2956462868.wav	D:\hc--document\all text\P8_medical\thesis_dataset\use_wav_raw\704657870\2956462868.wav	1	0	[0.1922968775, 2.0174996853, 1.757043004, 0.1050165743, 0.1640555114, 0.505358696]	0.192297	2.0175	1.75704	0.105017	0.164056	0.505359
1300	593	fn	cy_688092088_2596001892.wav	D:\hc--document\all text\P8_medical\thesis_dataset\use_wav_raw\688092088\2596001892.wav	1	1	[0.3341144919, 1.8440469503, 1.6323447227, 0.0817225799, 0.1498635262, 0.455850333]	0.334114	1.84405	1.63234	0.0817226	0.149864	0.45585
1301	524	general	dx_90245307_28926002.wav	D:\hc--document\all text\P8_medical\thesis_dataset\use_wav_raw\90245307\28926002.wav	1	0	[0.5001624823, 1.0318617821, 1.4304077625, 0.0657835752, 0.322140485, 0.206896022]	0.500162	1.03186	1.43041	0.0657836	0.32214	0.206896
1302	1552	rouhe	cy_719078580_3268830789.wav	D:\hc--document\all text\P8_medical\thesis_dataset\use_wav_raw\719078580\3268830789.wav	1	4	[1.044741869, 0.0600970984, 0.2762629986, 1.2017349005, 1.0028445721, 0.6778798699]	1.04474	0.0600971	0.276263	1.20173	1.00284	0.67788
1303	218	general	cy_242099882_426431706.wav	D:\hc--document\all text\P8_medical\thesis_dataset\use_wav_raw\242099882\426431706.wav	1	0	[1.2393372059, 0.536880672, 0.4177025259, 0.7467850447, 0.7042756081, 1.2875698805]	1.23934	0.536881	0.417703	0.746785	0.704276	1.28757
1304	1784	rouhe	cy_722804012_3354118802.wav	D:\hc--document\all text\P8_medical\thesis_dataset\use_wav_raw\722804012\3354118802.wav	1	4	[0.8674820065, 0.0729345456, 0.2963614762, 1.4711660147, 1.3206014633, 0.356153667]	0.867482	0.0729345	0.296361	1.47117	1.3206	0.356154
1305	1634	yl	cy_713856297_3148027145.wav	D:\hc--document\all text\P8_medical\thesis_dataset\use_wav_raw\713856297\3148027145.wav	1	5	[0.7973549366, 0.9929395914, 0.8397029638, 0.5223599672, 0.395655334, 1.5357502699]	0.797355	0.99294	0.839703	0.52236	0.395655	1.53575
1306	1149	yl	cy_606489599_1829629052.wav	D:\hc--document\all text\P8_medical\thesis_dataset\use_wav_raw\606489599\1829629052.wav	1	5	[0.9348039031, 0.0683924183, 0.1910157502, 1.5347411633, 0.7789484262, 0.5113255978]	0.934804	0.0683924	0.191016	1.53474	0.778948	0.511326
1307	1116	general	dx_90158619_29012968.wav	D:\hc--document\all text\P8_medical\thesis_dataset\use_wav_raw\90158619\29012968.wav	1	0	[1.1786795855, 0.0, 0.2495531589, 0.8463916183, 0.4546787441, 0.9754342437]	1.17868	0	0.249553	0.846392	0.454679	0.975434
1308	1625	rouhe	cy_715012022_3174602225.wav	D:\hc--document\all text\P8_medical\thesis_dataset\use_wav_raw\715012022\3174602225.wav	1	4	[1.1553909779, 0.0, 0.3768683076, 0.29806602, 1.493035078, 0.3643591404]	1.15539	0	0.376868	0.298066	1.49304	0.364359
1309	203	rouhe	cy_588237586_1735783922.wav	D:\hc--document\all text\P8_medical\thesis_dataset\use_wav_raw\588237586\1735783922.wav	1	4	[1.1177693605, 0.2998312116, 0.4701148272, 0.4040731788, 0.3903154731, 0.9766031504]	1.11777	0.299831	0.470115	0.404073	0.390315	0.976603
1310	908	yl	dx_60538547_16513771.wav	D:\hc--document\all text\P8_medical\thesis_dataset\use_wav_raw\60538547\16513771.wav	1	5	[0.1817100942, 2.022061348, 1.7059307098, 0.1277690977, 0.1951954961, 0.5134359598]	0.18171	2.02206	1.70593	0.127769	0.195195	0.513436
1311	597	wz	cy_720957312_3313242747.wav	D:\hc--document\all text\P8_medical\thesis_dataset\use_wav_raw\720957312\3313242747.wav	1	3	[1.1079616547, 0.1023037732, 0.2984805703, 1.1970124245, 1.0667937994, 0.6985411644]	1.10796	0.102304	0.298481	1.19701	1.06679	0.698541
1312	660	yl	dx_82039250_31352922.wav	D:\hc--document\all text\P8_medical\thesis_dataset\use_wav_raw\82039250\31352922.wav	1	5	[1.0865628719, 0.2126450539, 0.1257157624, 0.9789417982, 0.2778213024, 1.2732568979]	1.08656	0.212645	0.125716	0.978942	0.277821	1.27326
1313	1138	rouhe	cy_713943113_3150077253.wav	D:\hc--document\all text\P8_medical\thesis_dataset\use_wav_raw\713943113\3150077253.wav	1	4	[1.1737536192, 0.0, 0.2344110161, 1.0698740482, 0.7077830434, 0.7287750244]	1.17375	0	0.234411	1.06987	0.707783	0.728775
1314	674	jd	cy_599786848_1795185098.wav	D:\hc--document\all text\P8_medical\thesis_dataset\use_wav_raw\599786848\1795185098.wav	1	2	[0.6762203574, 0.7445352077, 1.2858057022, 0.1066108271, 0.3905763328, 0.0]	0.67622	0.744535	1.28581	0.106611	0.390576	0
1315	1399	jd	cy_667977705_2167128588.wav	D:\hc--document\all text\P8_medical\thesis_dataset\use_wav_raw\667977705\2167128588.wav	1	2	[0.4664136767, 1.2091828585, 1.5151553154, 0.0947712138, 0.2498867065, 0.1241281629]	0.466414	1.20918	1.51516	0.0947712	0.249887	0.124128
1316	528	jd	cy_704968172_2964806524.wav	D:\hc--document\all text\P8_medical\thesis_dataset\use_wav_raw\704968172\2964806524.wav	1	2	[0.189994216, 2.0050370693, 1.7275351286, 0.1242269427, 0.1495236456, 0.4773630202]	0.189994	2.00504	1.72754	0.124227	0.149524	0.477363
1317	1317	wz	cy_557552912_1574301896.wav	D:\hc--document\all text\P8_medical\thesis_dataset\use_wav_raw\557552912\1574301896.wav	1	3	[1.0161590576, 0.0, 0.31648013, 1.2225199938, 0.8853475451, 0.4737532735]	1.01616	0	0.31648	1.22252	0.885348	0.473753
1318	242	general	cy_647997321_2049727487.wav	D:\hc--document\all text\P8_medical\thesis_dataset\use_wav_raw\647997321\2049727487.wav	1	0	[0.9074524641, 0.3547426462, 0.7656846046, 0.2981422544, 1.2064919472, 0.0]	0.907452	0.354743	0.765685	0.298142	1.20649	0
1319	1457	general	cy_434060454_1060987899.wav	D:\hc--document\all text\P8_medical\thesis_dataset\use_wav_raw\434060454\1060987899.wav	1	0	[1.1325016022, 0.2079358697, 0.4497376084, 0.2018258423, 1.2054848671, 0.3663632572]	1.1325	0.207936	0.449738	0.201826	1.20548	0.366363
1320	1588	jd	cy_670033146_2209152762.wav	D:\hc--document\all text\P8_medical\thesis_dataset\use_wav_raw\670033146\2209152762.wav	1	2	[1.0100926161, 0.3545529246, 0.6659458876, 0.2774110138, 0.5872195363, 0.6690568924]	1.01009	0.354553	0.665946	0.277411	0.58722	0.669057
1321	183	wz	cy_720035514_3291136485.wav	D:\hc--document\all text\P8_medical\thesis_dataset\use_wav_raw\720035514\3291136485.wav	1	3	[0.952465415, 0.1429091096, 0.3324072957, 1.2732322216, 1.3088569641, 0.3406505287]	0.952465	0.142909	0.332407	1.27323	1.30886	0.340651
1322	198	jd	cy_719388503_3275955903.wav	D:\hc--document\all text\P8_medical\thesis_dataset\use_wav_raw\719388503\3275955903.wav	1	2	[1.2464468479, 0.1529407054, 0.1926720589, 0.9245454669, 0.403080672, 1.2033985853]	1.24645	0.152941	0.192672	0.924545	0.403081	1.2034
1323	1026	jd	cy_716480374_3209503496.wav	D:\hc--document\all text\P8_medical\thesis_dataset\use_wav_raw\716480374\3209503496.wav	1	2	[0.3220037222, 1.6243197918, 1.7741456032, 0.0746248364, 0.3619821072, 0.2005042732]	0.322004	1.62432	1.77415	0.0746248	0.361982	0.200504
1324	1214	yl	cy_715595705_3188016152.wav	D:\hc--document\all text\P8_medical\thesis_dataset\use_wav_raw\715595705\3188016152.wav	1	5	[0.5456821918, 1.6644531488, 1.5653982162, 0.1135732532, 0.3774073124, 0.281987071]	0.545682	1.66445	1.5654	0.113573	0.377407	0.281987
1325	873	jd	cy_594417937_1767967295.wav	D:\hc--document\all text\P8_medical\thesis_dataset\use_wav_raw\594417937\1767967295.wav	1	2	[0.6167604923, 0.9675620198, 1.2626111507, 0.1708514392, 0.2699925005, 0.2716050148]	0.61676	0.967562	1.26261	0.170851	0.269993	0.271605
1326	776	yl	cy_648518074_2052456785.wav	D:\hc--document\all text\P8_medical\thesis_dataset\use_wav_raw\648518074\2052456785.wav	1	5	[1.1044297218, 0.5382429361, 0.2946328223, 0.7907048464, 0.3903953433, 1.4370774031]	1.10443	0.538243	0.294633	0.790705	0.390395	1.43708
1327	1464	wz	cy_69003904_43562396.wav	D:\hc--document\all text\P8_medical\thesis_dataset\use_wav_raw\69003904\43562396.wav	1	3	[0.9750915766, 0.1258638948, 0.275080502, 1.4083737135, 1.2900338173, 0.2804766893]	0.975092	0.125864	0.275081	1.40837	1.29003	0.280477
1328	920	jd	dx_90256404_28998971.wav	D:\hc--document\all text\P8_medical\thesis_dataset\use_wav_raw\90256404\28998971.wav	1	2	[1.0369142294, 0.7126582861, 0.6525941491, 0.5129283071, 0.3469489217, 1.4736162424]	1.03691	0.712658	0.652594	0.512928	0.346949	1.47362
1329	1434	general	cy_722510242_3348204196.wav	D:\hc--document\all text\P8_medical\thesis_dataset\use_wav_raw\722510242\3348204196.wav	1	0	[1.2325919867, 0.2570610046, 0.3967845142, 0.4086028337, 0.4778648019, 1.0490319729]	1.23259	0.257061	0.396785	0.408603	0.477865	1.04903
1330	250	yl	cy_722292984_3342767144.wav	D:\hc--document\all text\P8_medical\thesis_dataset\use_wav_raw\722292984\3342767144.wav	1	5	[1.0570834875, 0.2330581248, 0.4852664471, 0.449765265, 0.334390223, 1.1478470564]	1.05708	0.233058	0.485266	0.449765	0.33439	1.14785
1331	761	jd	dx_81769691_27378930.wav	D:\hc--document\all text\P8_medical\thesis_dataset\use_wav_raw\81769691\27378930.wav	1	2	[0.2850688994, 1.7814867496, 1.6574854851, 0.0974057168, 0.3634924591, 0.311134696]	0.285069	1.78149	1.65749	0.0974057	0.363492	0.311135
1332	1503	fn	dx_91905079_30760076.wav	D:\hc--document\all text\P8_medical\thesis_dataset\use_wav_raw\91905079\30760076.wav	1	1	[1.0417375565, 0.3976262212, 0.6057903767, 0.3065347373, 0.3786686659, 1.0321551561]	1.04174	0.397626	0.60579	0.306535	0.378669	1.03216
1333	846	yl	cy_718697223_3260113846.wav	D:\hc--document\all text\P8_medical\thesis_dataset\use_wav_raw\718697223\3260113846.wav	1	5	[0.9825582504, 0.7731676698, 0.5053592324, 0.6609551907, 0.4728793502, 1.6349709034]	0.982558	0.773168	0.505359	0.660955	0.472879	1.63497
1334	1577	general	cy_564858557_1610621216.wav	D:\hc--document\all text\P8_medical\thesis_dataset\use_wav_raw\564858557\1610621216.wav	1	0	[1.0944182873, 0.0, 0.3669054806, 0.7257541418, 1.3344638348, 0.2164075077]	1.09442	0	0.366905	0.725754	1.33446	0.216408
1335	338	jd	cy_722713089_3351992259.wav	D:\hc--document\all text\P8_medical\thesis_dataset\use_wav_raw\722713089\3351992259.wav	1	2	[0.2152679712, 1.988147378, 1.6944304705, 0.1512240618, 0.1681469083, 0.4888898134]	0.215268	1.98815	1.69443	0.151224	0.168147	0.48889
1336	1402	general	cy_678179799_2380828016.wav	D:\hc--document\all text\P8_medical\thesis_dataset\use_wav_raw\678179799\2380828016.wav	1	0	[1.1520137787, 0.7058379054, 0.6011170149, 0.5174203515, 0.7021110654, 1.296843648]	1.15201	0.705838	0.601117	0.51742	0.702111	1.29684
1337	555	jd	cy_682307032_2470238912.wav	D:\hc--document\all text\P8_medical\thesis_dataset\use_wav_raw\682307032\2470238912.wav	1	2	[0.233222574, 1.9912843704, 1.700199604, 0.1485445201, 0.2645887733, 0.4826792479]	0.233223	1.99128	1.7002	0.148545	0.264589	0.482679
1338	831	jd	cy_709601718_3064704754.wav	D:\hc--document\all text\P8_medical\thesis_dataset\use_wav_raw\709601718\3064704754.wav	1	2	[0.4024843276, 1.5290745497, 1.6653023958, 0.0457043424, 0.2998285592, 0.1919603199]	0.402484	1.52907	1.6653	0.0457043	0.299829	0.19196
1339	562	jd	dx_84403808_24246236.wav	D:\hc--document\all text\P8_medical\thesis_dataset\use_wav_raw\84403808\24246236.wav	1	2	[1.0605456829, 0.0, 0.1214663684, 1.3974779844, 0.8612456322, 0.5255463123]	1.06055	0	0.121466	1.39748	0.861246	0.525546
1340	1375	wz	dx_91818253_30936582.wav	D:\hc--document\all text\P8_medical\thesis_dataset\use_wav_raw\91818253\30936582.wav	1	3	[0.9635686874, 0.088221319, 0.2246338874, 1.4358384609, 0.9339335561, 0.4940640926]	0.963569	0.0882213	0.224634	1.43584	0.933934	0.494064
1341	1329	rouhe	cy_716447830_3208543986.wav	D:\hc--document\all text\P8_medical\thesis_dataset\use_wav_raw\716447830\3208543986.wav	1	4	[1.1989272833, 0.0605232716, 0.3502470851, 0.3184800446, 1.2256108522, 0.3474428654]	1.19893	0.0605233	0.350247	0.31848	1.22561	0.347443
1342	213	wz	dx_77009183_21808496.wav	D:\hc--document\all text\P8_medical\thesis_dataset\use_wav_raw\77009183\21808496.wav	1	3	[0.8883228898, 0.1044506133, 0.3046129644, 1.4833395481, 0.7324575186, 0.4969137907]	0.888323	0.104451	0.304613	1.48334	0.732458	0.496914
1343	303	rouhe	cy_717020988_3222592990.wav	D:\hc--document\all text\P8_medical\thesis_dataset\use_wav_raw\717020988\3222592990.wav	1	4	[1.3205267191, 0.0053797513, 0.3128357232, 0.2614389658, 1.3485579491, 0.2782734632]	1.32053	0.00537975	0.312836	0.261439	1.34856	0.278273
1344	1368	yl	cy_722151379_3339705953.wav	D:\hc--document\all text\P8_medical\thesis_dataset\use_wav_raw\722151379\3339705953.wav	1	5	[1.1017479897, 0.454023391, 0.5449602008, 0.3648452163, 0.2642279565, 1.2116755247]	1.10175	0.454023	0.54496	0.364845	0.264228	1.21168
1345	1560	fn	dx_64648160_17836079.wav	D:\hc--document\all text\P8_medical\thesis_dataset\use_wav_raw\64648160\17836079.wav	1	1	[0.219537288, 2.0722939968, 1.7272229195, 0.064084813, 0.1732845455, 0.463675946]	0.219537	2.07229	1.72722	0.0640848	0.173285	0.463676
1346	405	yl	cy_696206040_2768926612.wav	D:\hc--document\all text\P8_medical\thesis_dataset\use_wav_raw\696206040\2768926612.wav	1	5	[1.0637328625, 0.1739926785, 0.5112107396, 0.0991934165, 1.1797674894, 0.6825973988]	1.06373	0.173993	0.511211	0.0991934	1.17977	0.682597
1347	825	rouhe	cy_446890764_1107486570.wav	D:\hc--document\all text\P8_medical\thesis_dataset\use_wav_raw\446890764\1107486570.wav	1	4	[0.923628211, 0.0, 0.2313000709, 1.3171253204, 1.2424447536, 0.2773421705]	0.923628	0	0.2313	1.31713	1.24244	0.277342
1348	1645	jd	cy_692063856_2680644492.wav	D:\hc--document\all text\P8_medical\thesis_dataset\use_wav_raw\692063856\2680644492.wav	1	2	[0.3249873817, 1.6678699255, 1.754417181, 0.0703699216, 0.2846205235, 0.3200612962]	0.324987	1.66787	1.75442	0.0703699	0.284621	0.320061
1349	893	wz	dx_91774524_30694142.wav	D:\hc--document\all text\P8_medical\thesis_dataset\use_wav_raw\91774524\30694142.wav	1	3	[0.9043314457, 0.0850807577, 0.19090873, 1.4785197973, 1.1498152018, 0.3946883082]	0.904331	0.0850808	0.190909	1.47852	1.14982	0.394688
1350	1660	jd	dx_50334501_13055687.wav	D:\hc--document\all text\P8_medical\thesis_dataset\use_wav_raw\50334501\13055687.wav	1	2	[1.052628994, 0.092817001, 0.5554664135, 0.2906541228, 0.5884814262, 0.8359757066]	1.05263	0.092817	0.555466	0.290654	0.588481	0.835976
1351	1697	rouhe	cy_707036072_3012567004.wav	D:\hc--document\all text\P8_medical\thesis_dataset\use_wav_raw\707036072\3012567004.wav	1	4	[1.2794884443, 0.0343033411, 0.2995847166, 0.5720279217, 1.4387239218, 0.4088069797]	1.27949	0.0343033	0.299585	0.572028	1.43872	0.408807
1352	139	rouhe	cy_714743441_3168669978.wav	D:\hc--document\all text\P8_medical\thesis_dataset\use_wav_raw\714743441\3168669978.wav	1	4	[1.0728185177, 0.0613446087, 0.1410431266, 1.3876830339, 0.9701730609, 0.4222916067]	1.07282	0.0613446	0.141043	1.38768	0.970173	0.422292
1353	1641	fn	cy_163639347_227326064.wav	D:\hc--document\all text\P8_medical\thesis_dataset\use_wav_raw\163639347\227326064.wav	1	1	[0.2473496497, 1.9103358984, 1.7118653059, 0.0674416795, 0.2043601573, 0.3720248342]	0.24735	1.91034	1.71187	0.0674417	0.20436	0.372025
1354	1627	jd	cy_569308789_1633912502.wav	D:\hc--document\all text\P8_medical\thesis_dataset\use_wav_raw\569308789\1633912502.wav	1	2	[0.2945266068, 1.5467925072, 1.668419838, 0.0826689675, 0.2818582356, 0.3139950037]	0.294527	1.54679	1.66842	0.082669	0.281858	0.313995
1355	841	general	cy_647500014_2047069913.wav	D:\hc--document\all text\P8_medical\thesis_dataset\use_wav_raw\647500014\2047069913.wav	1	0	[0.8740375638, 0.1410463303, 0.3800243735, 1.2224152088, 1.2133845091, 0.4729616046]	0.874038	0.141046	0.380024	1.22242	1.21338	0.472962
1356	234	yl	cy_720723607_3306625791.wav	D:\hc--document\all text\P8_medical\thesis_dataset\use_wav_raw\720723607\3306625791.wav	1	5	[1.0686299801, 0.2741098702, 0.5425188541, 0.3618888557, 0.410567075, 1.032004118]	1.06863	0.27411	0.542519	0.361889	0.410567	1.032
1357	326	jd	cy_672973508_2270324968.wav	D:\hc--document\all text\P8_medical\thesis_dataset\use_wav_raw\672973508\2270324968.wav	1	2	[0.986281395, 0.5371440053, 0.6023459435, 0.2885404527, 0.2755822539, 1.0695608854]	0.986281	0.537144	0.602346	0.28854	0.275582	1.06956
1358	1729	general	dx_79419293_25942546.wav	D:\hc--document\all text\P8_medical\thesis_dataset\use_wav_raw\79419293\25942546.wav	1	0	[1.133043766, 0.2069391608, 0.5464553833, 0.1082524136, 1.2200305462, 0.3584782481]	1.13304	0.206939	0.546455	0.108252	1.22003	0.358478
1359	1734	fn	cy_30992_141821.wav	D:\hc--document\all text\P8_medical\thesis_dataset\use_wav_raw\30992\141821.wav	1	1	[0.2369129658, 2.0489447117, 1.7046728134, 0.0454448536, 0.2204620838, 0.382401675]	0.236913	2.04894	1.70467	0.0454449	0.220462	0.382402
1360	884	rouhe	cy_720105377_3292621716.wav	D:\hc--document\all text\P8_medical\thesis_dataset\use_wav_raw\720105377\3292621716.wav	1	4	[0.9523746967, 0.1187772676, 0.2598334551, 1.4230328798, 1.2977398634, 0.3029629588]	0.952375	0.118777	0.259833	1.42303	1.29774	0.302963
1361	160	general	dx_89723551_29465132.wav	D:\hc--document\all text\P8_medical\thesis_dataset\use_wav_raw\89723551\29465132.wav	1	0	[0.9695611596, 0.3816107512, 0.7823269367, 0.1253344417, 1.2791688442, 0.0]	0.969561	0.381611	0.782327	0.125334	1.27917	0
1362	348	wz	dx_43006010_10921197.wav	D:\hc--document\all text\P8_medical\thesis_dataset\use_wav_raw\43006010\10921197.wav	1	3	[0.8631139398, 0.0677359179, 0.337916404, 1.4555177689, 1.0887213945, 0.5041791797]	0.863114	0.0677359	0.337916	1.45552	1.08872	0.504179
1363	535	wz	dx_55767971_14948711.wav	D:\hc--document\all text\P8_medical\thesis_dataset\use_wav_raw\55767971\14948711.wav	1	3	[0.8732884526, 0.035194166, 0.2598684132, 1.5339171886, 1.1598198414, 0.3359540403]	0.873288	0.0351942	0.259868	1.53392	1.15982	0.335954
1364	1025	rouhe	cy_720260206_3296971719.wav	D:\hc--document\all text\P8_medical\thesis_dataset\use_wav_raw\720260206\3296971719.wav	1	4	[0.9420222044, 0.0555092916, 0.3023874164, 1.2758973837, 1.3968093395, 0.2361843735]	0.942022	0.0555093	0.302387	1.2759	1.39681	0.236184
1365	1218	yl	cy_670119899_2210908648.wav	D:\hc--document\all text\P8_medical\thesis_dataset\use_wav_raw\670119899\2210908648.wav	1	5	[1.2130804062, 0.2894145846, 0.3836762905, 0.5578383207, 0.5313377976, 1.0757184029]	1.21308	0.289415	0.383676	0.557838	0.531338	1.07572
1366	882	general	cy_633633822_1974624710.wav	D:\hc--document\all text\P8_medical\thesis_dataset\use_wav_raw\633633822\1974624710.wav	1	0	[1.2373703718, 0.248710826, 0.3880747259, 0.447163105, 0.5860379934, 1.0121270418]	1.23737	0.248711	0.388075	0.447163	0.586038	1.01213
1367	478	wz	cy_717900576_3241438103.wav	D:\hc--document\all text\P8_medical\thesis_dataset\use_wav_raw\717900576\3241438103.wav	1	3	[0.859573245, 0.2233614475, 0.7824546695, 0.1601866633, 0.9016321898, 0.3289868832]	0.859573	0.223361	0.782455	0.160187	0.901632	0.328987
1368	146	wz	cy_718963486_3266447463.wav	D:\hc--document\all text\P8_medical\thesis_dataset\use_wav_raw\718963486\3266447463.wav	1	3	[1.0144153833, 0.1276725382, 0.3424078524, 1.2197848558, 1.3987708092, 0.1992808431]	1.01442	0.127673	0.342408	1.21978	1.39877	0.199281
1369	1783	yl	cy_705923054_2987238172.wav	D:\hc--document\all text\P8_medical\thesis_dataset\use_wav_raw\705923054\2987238172.wav	1	5	[0.9608430266, 0.226531148, 0.1857264042, 1.2168605328, 0.1620460451, 1.1470531225]	0.960843	0.226531	0.185726	1.21686	0.162046	1.14705
1370	847	rouhe	cy_712001245_3111736680.wav	D:\hc--document\all text\P8_medical\thesis_dataset\use_wav_raw\712001245\3111736680.wav	1	4	[1.2453695536, 0.0178095289, 0.3318872154, 0.2577139735, 1.4026739597, 0.2549825013]	1.24537	0.0178095	0.331887	0.257714	1.40267	0.254983
1371	1447	general	cy_677565194_2367502452.wav	D:\hc--document\all text\P8_medical\thesis_dataset\use_wav_raw\677565194\2367502452.wav	1	0	[0.9912580252, 0.100834772, 0.2192136496, 1.4027906656, 1.1239054203, 0.4051138759]	0.991258	0.100835	0.219214	1.40279	1.12391	0.405114
1372	1623	general	cy_682483609_2474176866.wav	D:\hc--document\all text\P8_medical\thesis_dataset\use_wav_raw\682483609\2474176866.wav	1	0	[0.7717176676, 0.6246327162, 0.9553118348, 0.2471710593, 0.3705714643, 0.6132349968]	0.771718	0.624633	0.955312	0.247171	0.370571	0.613235
1373	572	general	cy_711236274_3097102988.wav	D:\hc--document\all text\P8_medical\thesis_dataset\use_wav_raw\711236274\3097102988.wav	1	0	[1.1195659637, 0.2631406486, 0.2821280062, 0.7232536077, 0.4207582474, 1.1750189066]	1.11957	0.263141	0.282128	0.723254	0.420758	1.17502
1374	1459	rouhe	cy_722964597_3359103854.wav	D:\hc--document\all text\P8_medical\thesis_dataset\use_wav_raw\722964597\3359103854.wav	1	4	[1.2472243309, 0.0, 0.3403280973, 0.6105241776, 1.1693408489, 0.2089060247]	1.24722	0	0.340328	0.610524	1.16934	0.208906
1375	104	jd	cy_719003509_3267823529.wav	D:\hc--document\all text\P8_medical\thesis_dataset\use_wav_raw\719003509\3267823529.wav	1	2	[0.9989802837, 0.1571585089, 0.3238114417, 1.2060163021, 1.4596812725, 0.2799496353]	0.99898	0.157159	0.323811	1.20602	1.45968	0.27995
1376	934	fn	cy_705050160_2965956240.wav	D:\hc--document\all text\P8_medical\thesis_dataset\use_wav_raw\705050160\2965956240.wav	1	1	[0.4687791467, 1.5238391161, 1.6636625528, 0.0470393077, 0.2906104028, 0.1028485224]	0.468779	1.52384	1.66366	0.0470393	0.29061	0.102849
1377	1168	general	dx_49535778_13041666.wav	D:\hc--document\all text\P8_medical\thesis_dataset\use_wav_raw\49535778\13041666.wav	1	0	[0.9941116571, 0.1407414824, 0.2995828688, 1.2931520939, 1.4145784378, 0.3258043826]	0.994112	0.140741	0.299583	1.29315	1.41458	0.325804
1378	1280	general	cy_712712336_3124847576.wav	D:\hc--document\all text\P8_medical\thesis_dataset\use_wav_raw\712712336\3124847576.wav	1	0	[1.1045473814, 0.1794833392, 0.4886775613, 0.3307578564, 0.7100718021, 0.7133162618]	1.10455	0.179483	0.488678	0.330758	0.710072	0.713316
1379	89	wz	dx_89414710_27835794.wav	D:\hc--document\all text\P8_medical\thesis_dataset\use_wav_raw\89414710\27835794.wav	1	3	[1.0130701065, 0.1127555519, 0.2401519418, 1.4295953512, 0.7002391815, 0.7032202482]	1.01307	0.112756	0.240152	1.4296	0.700239	0.70322
1380	1406	wz	cy_681720467_2458009632.wav	D:\hc--document\all text\P8_medical\thesis_dataset\use_wav_raw\681720467\2458009632.wav	1	3	[1.326385498, 0.0678930506, 0.307526201, 0.1927909851, 1.3274005651, 0.2407811135]	1.32639	0.0678931	0.307526	0.192791	1.3274	0.240781
1381	978	fn	dx_91156065_30359631.wav	D:\hc--document\all text\P8_medical\thesis_dataset\use_wav_raw\91156065\30359631.wav	1	1	[0.4141921997, 1.6217333078, 1.496894002, 0.2073573172, 0.3205619156, 0.7357771993]	0.414192	1.62173	1.49689	0.207357	0.320562	0.735777
1382	1333	fn	cy_562866280_1600313357.wav	D:\hc--document\all text\P8_medical\thesis_dataset\use_wav_raw\562866280\1600313357.wav	1	1	[0.1984590888, 2.0000810623, 1.6827995777, 0.1023351923, 0.184296459, 0.551795125]	0.198459	2.00008	1.6828	0.102335	0.184296	0.551795
1383	685	wz	dx_90518131_29445356.wav	D:\hc--document\all text\P8_medical\thesis_dataset\use_wav_raw\90518131\29445356.wav	1	3	[1.1191453934, 0.0, 0.1035301015, 1.2270203829, 0.5383896828, 0.702925086]	1.11915	0	0.10353	1.22702	0.53839	0.702925
1384	1760	fn	dx_89804739_28371424.wav	D:\hc--document\all text\P8_medical\thesis_dataset\use_wav_raw\89804739\28371424.wav	1	1	[0.2309220433, 1.8801721334, 1.6939814091, 0.1217755824, 0.2353639603, 0.4384787977]	0.230922	1.88017	1.69398	0.121776	0.235364	0.438479
1385	1136	rouhe	cy_723024046_3359772075.wav	D:\hc--document\all text\P8_medical\thesis_dataset\use_wav_raw\723024046\3359772075.wav	1	4	[1.2211723328, 0.0352281034, 0.3910470009, 0.3370851576, 1.4369935989, 0.4048905969]	1.22117	0.0352281	0.391047	0.337085	1.43699	0.404891
1386	1225	wz	dx_67735691_18913697.wav	D:\hc--document\all text\P8_medical\thesis_dataset\use_wav_raw\67735691\18913697.wav	1	3	[1.1566951275, 0.0, 0.1578525305, 1.1624838114, 0.7924842834, 0.6336269975]	1.1567	0	0.157853	1.16248	0.792484	0.633627
1387	169	rouhe	cy_716651360_3213143126.wav	D:\hc--document\all text\P8_medical\thesis_dataset\use_wav_raw\716651360\3213143126.wav	1	4	[1.1044297218, 0.0613314062, 0.4735037982, 0.3674994111, 1.3399287462, 0.3843923509]	1.10443	0.0613314	0.473504	0.367499	1.33993	0.384392
1388	1324	fn	cy_693879506_2719295064.wav	D:\hc--document\all text\P8_medical\thesis_dataset\use_wav_raw\693879506\2719295064.wav	1	1	[0.2857200205, 1.8612533808, 1.6010638475, 0.1383832991, 0.2379895449, 0.5654301643]	0.28572	1.86125	1.60106	0.138383	0.23799	0.56543
1389	1533	yl	dx_87863628_25900903.wav	D:\hc--document\all text\P8_medical\thesis_dataset\use_wav_raw\87863628\25900903.wav	1	5	[0.58456707, 1.4874583483, 1.1981728077, 0.2408551127, 0.376173079, 1.0200384855]	0.584567	1.48746	1.19817	0.240855	0.376173	1.02004
1390	319	yl	dx_91500410_30566420.wav	D:\hc--document\all text\P8_medical\thesis_dataset\use_wav_raw\91500410\30566420.wav	1	5	[1.0506621599, 0.5672810674, 0.2757517397, 0.73416394, 0.3255991936, 1.5514206886]	1.05066	0.567281	0.275752	0.734164	0.325599	1.55142
1391	1217	yl	cy_715253772_3180389878.wav	D:\hc--document\all text\P8_medical\thesis_dataset\use_wav_raw\715253772\3180389878.wav	1	5	[1.054846406, 0.3458765149, 0.6643642187, 0.1630939245, 0.9420512319, 0.2332449108]	1.05485	0.345877	0.664364	0.163094	0.942051	0.233245
1392	1490	general	dx_90869923_30249707.wav	D:\hc--document\all text\P8_medical\thesis_dataset\use_wav_raw\90869923\30249707.wav	1	0	[1.1007270813, 0.1362041831, 0.2446060479, 1.0875064135, 0.3200466931, 0.9061404467]	1.10073	0.136204	0.244606	1.08751	0.320047	0.90614
1393	915	rouhe	cy_669106704_2190035730.wav	D:\hc--document\all text\P8_medical\thesis_dataset\use_wav_raw\669106704\2190035730.wav	1	4	[0.5917887688, 1.1563009024, 1.3947401047, 0.1685543209, 0.2357853949, 0.2016492635]	0.591789	1.1563	1.39474	0.168554	0.235785	0.201649
1394	115	rouhe	cy_644598551_2032139762.wav	D:\hc--document\all text\P8_medical\thesis_dataset\use_wav_raw\644598551\2032139762.wav	1	4	[1.0681644678, 0.0311221872, 0.1837350726, 1.2979102135, 0.5397390723, 0.9659617543]	1.06816	0.0311222	0.183735	1.29791	0.539739	0.965962
1395	1762	fn	cy_706387562_2998151560.wav	D:\hc--document\all text\P8_medical\thesis_dataset\use_wav_raw\706387562\2998151560.wav	1	1	[0.1908407658, 1.8529410362, 1.7473413944, 0.080275774, 0.239128381, 0.4628196657]	0.190841	1.85294	1.74734	0.0802758	0.239128	0.46282
1396	370	rouhe	dx_72561152_20344828.wav	D:\hc--document\all text\P8_medical\thesis_dataset\use_wav_raw\72561152\20344828.wav	1	4	[1.1813678741, 0.0, 0.4041247964, 0.4638684392, 1.1878666878, 0.2613447011]	1.18137	0	0.404125	0.463868	1.18787	0.261345
1397	1701	jd	cy_674681786_2306691020.wav	D:\hc--document\all text\P8_medical\thesis_dataset\use_wav_raw\674681786\2306691020.wav	1	2	[0.4226495922, 1.3791693449, 1.6232635975, 0.0780251399, 0.3029587865, 0.0966473818]	0.42265	1.37917	1.62326	0.0780251	0.302959	0.0966474
1398	1255	yl	cy_679708921_2414276356.wav	D:\hc--document\all text\P8_medical\thesis_dataset\use_wav_raw\679708921\2414276356.wav	1	5	[0.5092701316, 1.4053280354, 1.4697812796, 0.1430095881, 0.4165181518, 0.317666918]	0.50927	1.40533	1.46978	0.14301	0.416518	0.317667
1399	795	yl	cy_700192282_2855746442.wav	D:\hc--document\all text\P8_medical\thesis_dataset\use_wav_raw\700192282\2855746442.wav	1	5	[1.11391747, 0.1121853143, 0.4910793006, 0.3848211467, 0.6218534112, 0.993999958]	1.11392	0.112185	0.491079	0.384821	0.621853	0.994
1400	642	yl	dx_88040841_26507721.wav	D:\hc--document\all text\P8_medical\thesis_dataset\use_wav_raw\88040841\26507721.wav	1	5	[0.234087497, 1.9687709808, 1.6893796921, 0.0920062214, 0.289765954, 0.4638731182]	0.234087	1.96877	1.68938	0.0920062	0.289766	0.463873
1401	575	jd	cy_689266892_2621478714.wav	D:\hc--document\all text\P8_medical\thesis_dataset\use_wav_raw\689266892\2621478714.wav	1	2	[1.0399240255, 0.158255294, 0.3701536655, 1.3371027708, 1.0937498808, 0.3781035841]	1.03992	0.158255	0.370154	1.3371	1.09375	0.378104
1402	1111	wz	dx_92635177_32452694.wav	D:\hc--document\all text\P8_medical\thesis_dataset\use_wav_raw\92635177\32452694.wav	1	3	[0.8433272243, 0.096714288, 0.3718780875, 1.3381971121, 1.3043253422, 0.3437513411]	0.843327	0.0967143	0.371878	1.3382	1.30433	0.343751
1403	1004	rouhe	cy_710868520_3090125536.wav	D:\hc--document\all text\P8_medical\thesis_dataset\use_wav_raw\710868520\3090125536.wav	1	4	[1.3501973152, 0.0605624616, 0.2638753951, 0.5194875598, 1.3732802868, 0.5274427533]	1.3502	0.0605625	0.263875	0.519488	1.37328	0.527443
1404	123	general	cy_717346427_3229454724.wav	D:\hc--document\all text\P8_medical\thesis_dataset\use_wav_raw\717346427\3229454724.wav	1	0	[1.2159894705, 0.1384928524, 0.3168875873, 0.5160525441, 0.8485747576, 0.7884400487]	1.21599	0.138493	0.316888	0.516053	0.848575	0.78844
1405	489	rouhe	cy_724436532_3394361691.wav	D:\hc--document\all text\P8_medical\thesis_dataset\use_wav_raw\724436532\3394361691.wav	1	4	[0.9153983593, 0.0745077878, 0.282841295, 1.4927436113, 1.1319886446, 0.3149551451]	0.915398	0.0745078	0.282841	1.49274	1.13199	0.314955
1406	459	yl	cy_720633376_3304763729.wav	D:\hc--document\all text\P8_medical\thesis_dataset\use_wav_raw\720633376\3304763729.wav	1	5	[1.1631691456, 0.3663915098, 0.3234981, 0.607929945, 0.2746431231, 1.2701874971]	1.16317	0.366392	0.323498	0.60793	0.274643	1.27019
1407	1692	jd	dx_88132218_27930943.wav	D:\hc--document\all text\P8_medical\thesis_dataset\use_wav_raw\88132218\27930943.wav	1	2	[0.999910295, 0.5400217772, 0.7342066765, 0.2324646711, 0.20252648, 0.9044938087]	0.99991	0.540022	0.734207	0.232465	0.202526	0.904494
1408	1137	wz	dx_67464997_18854935.wav	D:\hc--document\all text\P8_medical\thesis_dataset\use_wav_raw\67464997\18854935.wav	1	3	[0.8586879969, 0.0243896376, 0.2039261013, 1.5120191574, 1.1091487408, 0.3359501362]	0.858688	0.0243896	0.203926	1.51202	1.10915	0.33595
1409	1525	jd	cy_653423999_2078965937.wav	D:\hc--document\all text\P8_medical\thesis_dataset\use_wav_raw\653423999\2078965937.wav	1	2	[0.9089331627, 0.9864988923, 0.7128510475, 0.5997574925, 0.3597692251, 1.4113781452]	0.908933	0.986499	0.712851	0.599757	0.359769	1.41138
1410	1035	yl	cy_684295630_2514491124.wav	D:\hc--document\all text\P8_medical\thesis_dataset\use_wav_raw\684295630\2514491124.wav	1	5	[0.5814595222, 1.3179008961, 1.3291774988, 0.2099350691, 0.2388423383, 0.4278371632]	0.58146	1.3179	1.32918	0.209935	0.238842	0.427837
1411	548	fn	cy_669373631_2195466152.wav	D:\hc--document\all text\P8_medical\thesis_dataset\use_wav_raw\669373631\2195466152.wav	1	1	[0.4055058062, 1.7339498997, 1.6403340101, 0.0467640199, 0.3135591745, 0.3489660919]	0.405506	1.73395	1.64033	0.046764	0.313559	0.348966
1412	1411	yl	cy_550441763_1539952109.wav	D:\hc--document\all text\P8_medical\thesis_dataset\use_wav_raw\550441763\1539952109.wav	1	5	[0.9668831825, 0.9131092429, 0.7577798367, 0.4678295255, 0.6020105481, 1.3209812641]	0.966883	0.913109	0.75778	0.46783	0.602011	1.32098
1413	823	fn	cy_686808787_2567827208.wav	D:\hc--document\all text\P8_medical\thesis_dataset\use_wav_raw\686808787\2567827208.wav	1	1	[0.3520310223, 1.7826054096, 1.5752390623, 0.1315305084, 0.3196157813, 0.2938573956]	0.352031	1.78261	1.57524	0.131531	0.319616	0.293857
1414	1506	rouhe	cy_722481494_3346648560.wav	D:\hc--document\all text\P8_medical\thesis_dataset\use_wav_raw\722481494\3346648560.wav	1	4	[1.1137803793, 0.0174741372, 0.4101327658, 0.3644431233, 1.4856681824, 0.3246961236]	1.11378	0.0174741	0.410133	0.364443	1.48567	0.324696
1415	498	general	cy_661931735_2126080778.wav	D:\hc--document\all text\P8_medical\thesis_dataset\use_wav_raw\661931735\2126080778.wav	1	0	[0.7933630943, 0.6167929173, 1.0387009382, 0.222948432, 0.4896050394, 0.2943360806]	0.793363	0.616793	1.0387	0.222948	0.489605	0.294336
1416	844	fn	cy_718234304_3250094219.wav	D:\hc--document\all text\P8_medical\thesis_dataset\use_wav_raw\718234304\3250094219.wav	1	1	[0.2086602598, 1.9657799006, 1.7026820183, 0.0712856427, 0.2375807166, 0.4351845086]	0.20866	1.96578	1.70268	0.0712856	0.237581	0.435185
1417	316	yl	cy_634426422_1979342870.wav	D:\hc--document\all text\P8_medical\thesis_dataset\use_wav_raw\634426422\1979342870.wav	1	5	[0.4619762301, 1.6859031916, 1.4925857782, 0.1522672176, 0.249229461, 0.5418180227]	0.461976	1.6859	1.49259	0.152267	0.249229	0.541818
1418	1677	general	cy_689565223_2630394924.wav	D:\hc--document\all text\P8_medical\thesis_dataset\use_wav_raw\689565223\2630394924.wav	1	0	[1.1906626225, 0.1436855495, 0.4290197194, 0.3531885445, 1.4914611578, 0.3073320389]	1.19066	0.143686	0.42902	0.353189	1.49146	0.307332
1419	1499	wz	dx_91860961_31174254.wav	D:\hc--document\all text\P8_medical\thesis_dataset\use_wav_raw\91860961\31174254.wav	1	3	[1.0774706602, 0.1487385184, 0.3672889471, 1.0335001945, 1.102535367, 0.53377074]	1.07747	0.148739	0.367289	1.0335	1.10254	0.533771
1420	84	rouhe	dx_82027839_31294599.wav	D:\hc--document\all text\P8_medical\thesis_dataset\use_wav_raw\82027839\31294599.wav	1	4	[1.0029586554, 0.0, 0.2597324848, 1.3238449097, 0.8694123626, 0.6591743827]	1.00296	0	0.259732	1.32384	0.869412	0.659174
1421	928	general	cy_717931294_3242096132.wav	D:\hc--document\all text\P8_medical\thesis_dataset\use_wav_raw\717931294\3242096132.wav	1	0	[1.0941021442, 0.0614970475, 0.2767306268, 1.0992285013, 0.6648690104, 0.8499106765]	1.0941	0.061497	0.276731	1.09923	0.664869	0.849911
1422	1060	general	dx_87155054_26968359.wav	D:\hc--document\all text\P8_medical\thesis_dataset\use_wav_raw\87155054\26968359.wav	1	0	[1.2946320772, 0.3119494915, 0.2279220521, 0.8922700286, 0.514532268, 1.2851938009]	1.29463	0.311949	0.227922	0.89227	0.514532	1.28519
1423	516	yl	cy_675773135_2329419664.wav	D:\hc--document\all text\P8_medical\thesis_dataset\use_wav_raw\675773135\2329419664.wav	1	5	[0.29100734, 1.854660511, 1.6586738825, 0.1083951667, 0.3186540306, 0.3921411633]	0.291007	1.85466	1.65867	0.108395	0.318654	0.392141
1424	1528	wz	cy_709959941_3070984045.wav	D:\hc--document\all text\P8_medical\thesis_dataset\use_wav_raw\709959941\3070984045.wav	1	3	[1.3158727884, 0.0, 0.3080666661, 0.2807790935, 1.3420565128, 0.3444302082]	1.31587	0	0.308067	0.280779	1.34206	0.34443
1425	267	fn	cy_686399908_2559109844.wav	D:\hc--document\all text\P8_medical\thesis_dataset\use_wav_raw\686399908\2559109844.wav	1	1	[0.2740277648, 1.8024437428, 1.6955817938, 0.0468346775, 0.3130122125, 0.2907781899]	0.274028	1.80244	1.69558	0.0468347	0.313012	0.290778
1426	546	wz	cy_717000735_3220809257.wav	D:\hc--document\all text\P8_medical\thesis_dataset\use_wav_raw\717000735\3220809257.wav	1	3	[1.1312652826, 0.0374946073, 0.3753237724, 0.4375027716, 1.3782844543, 0.3898155391]	1.13127	0.0374946	0.375324	0.437503	1.37828	0.389816
1427	1321	jd	cy_645437524_2036082779.wav	D:\hc--document\all text\P8_medical\thesis_dataset\use_wav_raw\645437524\2036082779.wav	1	2	[0.494459033, 1.1038426161, 1.4487087727, 0.187364608, 0.2292775661, 0.2367683202]	0.494459	1.10384	1.44871	0.187365	0.229278	0.236768
1428	1167	rouhe	cy_710220182_3078133954.wav	D:\hc--document\all text\P8_medical\thesis_dataset\use_wav_raw\710220182\3078133954.wav	1	4	[1.2564991713, 0.1365462244, 0.3533016741, 0.23624596, 1.4258440733, 0.4129918218]	1.2565	0.136546	0.353302	0.236246	1.42584	0.412992
1429	1073	general	cy_705391464_2975704698.wav	D:\hc--document\all text\P8_medical\thesis_dataset\use_wav_raw\705391464\2975704698.wav	1	0	[1.2178418636, 0.3223741353, 0.3432669342, 0.6524454355, 0.4024964869, 1.3462797403]	1.21784	0.322374	0.343267	0.652445	0.402496	1.34628
1430	853	general	cy_717687295_3237324340.wav	D:\hc--document\all text\P8_medical\thesis_dataset\use_wav_raw\717687295\3237324340.wav	1	0	[0.9656428099, 0.10559313, 0.2096832395, 1.4023404121, 1.029589653, 0.4334950149]	0.965643	0.105593	0.209683	1.40234	1.02959	0.433495
1431	1003	yl	dx_87486717_25606127.wav	D:\hc--document\all text\P8_medical\thesis_dataset\use_wav_raw\87486717\25606127.wav	1	5	[1.0002944469, 0.7725871205, 0.61812222, 0.572847724, 0.4065173268, 1.5516974926]	1.00029	0.772587	0.618122	0.572848	0.406517	1.5517
1432	1407	yl	cy_697278300_2790677352.wav	D:\hc--document\all text\P8_medical\thesis_dataset\use_wav_raw\697278300\2790677352.wav	1	5	[0.9196893573, 0.5483641624, 0.6827344894, 0.3221588731, 0.3856395185, 1.1216727495]	0.919689	0.548364	0.682734	0.322159	0.38564	1.12167
1433	1752	yl	dx_49425427_12787238.wav	D:\hc--document\all text\P8_medical\thesis_dataset\use_wav_raw\49425427\12787238.wav	1	5	[1.0321865082, 0.9614065886, 0.5967633724, 0.5349473953, 0.2909089327, 1.4897924662]	1.03219	0.961407	0.596763	0.534947	0.290909	1.48979
1434	1072	fn	cy_680498256_2431828282.wav	D:\hc--document\all text\P8_medical\thesis_dataset\use_wav_raw\680498256\2431828282.wav	1	1	[1.1584500074, 0.0941428468, 0.3235392272, 0.6438528299, 1.4804694653, 0.3085493445]	1.15845	0.0941428	0.323539	0.643853	1.48047	0.308549
1435	1211	rouhe	cy_675009308_2313745292.wav	D:\hc--document\all text\P8_medical\thesis_dataset\use_wav_raw\675009308\2313745292.wav	1	4	[1.1895576715, 0.0604062974, 0.3773054183, 0.339746058, 1.4107886553, 0.2793076932]	1.18956	0.0604063	0.377305	0.339746	1.41079	0.279308
1436	609	fn	cy_722485504_3346865286.wav	D:\hc--document\all text\P8_medical\thesis_dataset\use_wav_raw\722485504\3346865286.wav	1	1	[0.2689006627, 1.9042996168, 1.6904973984, 0.1441877931, 0.1183352172, 0.5184307694]	0.268901	1.9043	1.6905	0.144188	0.118335	0.518431
1437	1700	jd	cy_724231126_3385955893.wav	D:\hc--document\all text\P8_medical\thesis_dataset\use_wav_raw\724231126\3385955893.wav	1	2	[1.0509052277, 0.186857, 0.319032222, 1.097892642, 1.4015543461, 0.2543351352]	1.05091	0.186857	0.319032	1.09789	1.40155	0.254335
1438	1404	general	cy_714505440_3164590099.wav	D:\hc--document\all text\P8_medical\thesis_dataset\use_wav_raw\714505440\3164590099.wav	1	0	[0.9948435426, 0.2651824057, 0.7434427738, 0.2272324115, 1.2388619184, 0.0]	0.994844	0.265182	0.743443	0.227232	1.23886	0
1439	514	fn	cy_724148157_3386686884.wav	D:\hc--document\all text\P8_medical\thesis_dataset\use_wav_raw\724148157\3386686884.wav	1	1	[0.190680787, 1.9823971987, 1.7292718887, 0.1275622994, 0.1933365613, 0.5416256785]	0.190681	1.9824	1.72927	0.127562	0.193337	0.541626
1440	418	jd	cy_203404023_323245628.wav	D:\hc--document\all text\P8_medical\thesis_dataset\use_wav_raw\203404023\323245628.wav	1	2	[0.3000966311, 1.8720356226, 1.6369564533, 0.093795903, 0.2614168227, 0.493275404]	0.300097	1.87204	1.63696	0.0937959	0.261417	0.493275
1441	251	fn	cy_721836467_3332156781.wav	D:\hc--document\all text\P8_medical\thesis_dataset\use_wav_raw\721836467\3332156781.wav	1	1	[0.9245222807, 0.0, 0.2419188917, 1.2741712332, 1.2472397089, 0.3552631438]	0.924522	0	0.241919	1.27417	1.24724	0.355263
1442	1295	jd	dx_87158921_26990485.wav	D:\hc--document\all text\P8_medical\thesis_dataset\use_wav_raw\87158921\26990485.wav	1	2	[0.2649657726, 1.6849324703, 1.5993995667, 0.1540316939, 0.1910475343, 0.2767843008]	0.264966	1.68493	1.5994	0.154032	0.191048	0.276784
1443	1665	fn	dx_88795360_27313691.wav	D:\hc--document\all text\P8_medical\thesis_dataset\use_wav_raw\88795360\27313691.wav	1	1	[0.3919123709, 1.653729558, 1.6736159325, 0.0827147439, 0.2666111588, 0.4562185705]	0.391912	1.65373	1.67362	0.0827147	0.266611	0.456219
1444	737	fn	cy_675393891_2321892460.wav	D:\hc--document\all text\P8_medical\thesis_dataset\use_wav_raw\675393891\2321892460.wav	1	1	[0.1788970679, 1.9232288599, 1.7975082397, 0.0778902024, 0.212426737, 0.420550406]	0.178897	1.92323	1.79751	0.0778902	0.212427	0.42055
1445	746	fn	cy_598992925_1791015698.wav	D:\hc--document\all text\P8_medical\thesis_dataset\use_wav_raw\598992925\1791015698.wav	1	1	[0.3391925991, 1.7868056297, 1.6439685822, 0.0621749684, 0.2882964611, 0.3871085942]	0.339193	1.78681	1.64397	0.062175	0.288296	0.387109
1446	592	yl	cy_719719927_3284657637.wav	D:\hc--document\all text\P8_medical\thesis_dataset\use_wav_raw\719719927\3284657637.wav	1	5	[0.3971516192, 1.5904145241, 1.5703682899, 0.1591363549, 0.1608445495, 0.6217348576]	0.397152	1.59041	1.57037	0.159136	0.160845	0.621735
1447	396	yl	cy_717298657_3228299124.wav	D:\hc--document\all text\P8_medical\thesis_dataset\use_wav_raw\717298657\3228299124.wav	1	5	[1.1673624516, 0.6977182627, 0.4418530762, 0.7036895752, 0.4362743199, 1.4894690514]	1.16736	0.697718	0.441853	0.70369	0.436274	1.48947
1448	785	wz	dx_92379325_32036490.wav	D:\hc--document\all text\P8_medical\thesis_dataset\use_wav_raw\92379325\32036490.wav	1	3	[0.2117129415, 1.9197089672, 1.6956939697, 0.1166817695, 0.2081222087, 0.4938834906]	0.211713	1.91971	1.69569	0.116682	0.208122	0.493883
1449	83	jd	cy_557355521_1573428749.wav	D:\hc--document\all text\P8_medical\thesis_dataset\use_wav_raw\557355521\1573428749.wav	1	2	[0.3274147213, 1.7499064207, 1.7442134619, 0.0318594687, 0.2145485282, 0.3202754855]	0.327415	1.74991	1.74421	0.0318595	0.214549	0.320275
1450	238	fn	cy_673570337_2283057060.wav	D:\hc--document\all text\P8_medical\thesis_dataset\use_wav_raw\673570337\2283057060.wav	1	1	[0.4409255981, 1.6243206263, 1.6567002535, 0.108087562, 0.4119476676, 0.312027365]	0.440926	1.62432	1.6567	0.108088	0.411948	0.312027
1451	1615	yl	dx_84099440_28317203.wav	D:\hc--document\all text\P8_medical\thesis_dataset\use_wav_raw\84099440\28317203.wav	1	5	[0.8278540373, 0.682605505, 0.7660360336, 0.2337154001, 0.3479349017, 1.1415581703]	0.827854	0.682606	0.766036	0.233715	0.347935	1.14156
1452	1063	fn	dx_87631107_25821372.wav	D:\hc--document\all text\P8_medical\thesis_dataset\use_wav_raw\87631107\25821372.wav	1	1	[0.1787064224, 1.9371351004, 1.6474400759, 0.1362652034, 0.1287272424, 0.5804089904]	0.178706	1.93714	1.64744	0.136265	0.128727	0.580409
1453	1201	general	dx_88053310_26581327.wav	D:\hc--document\all text\P8_medical\thesis_dataset\use_wav_raw\88053310\26581327.wav	1	0	[0.9158534408, 0.4704404771, 0.8061447144, 0.1539514661, 1.0193508863, 0.1688657403]	0.915853	0.47044	0.806145	0.153951	1.01935	0.168866
1454	244	jd	cy_724349077_3392243473.wav	D:\hc--document\all text\P8_medical\thesis_dataset\use_wav_raw\724349077\3392243473.wav	1	2	[0.2096733004, 1.9119858742, 1.7209460735, 0.0949409753, 0.2455492467, 0.4080549479]	0.209673	1.91199	1.72095	0.094941	0.245549	0.408055
1455	415	yl	dx_86926710_25707835.wav	D:\hc--document\all text\P8_medical\thesis_dataset\use_wav_raw\86926710\25707835.wav	1	5	[1.0239294767, 0.2878910899, 0.6224079132, 0.2531717122, 0.4272615016, 1.0639237165]	1.02393	0.287891	0.622408	0.253172	0.427262	1.06392
1456	865	wz	cy_715859243_3194480594.wav	D:\hc--document\all text\P8_medical\thesis_dataset\use_wav_raw\715859243\3194480594.wav	1	3	[0.934630096, 0.133256197, 0.2227646858, 1.4386641979, 1.1517566442, 0.3973915577]	0.93463	0.133256	0.222765	1.43866	1.15176	0.397392
1457	1384	fn	cy_715496123_3185811309.wav	D:\hc--document\all text\P8_medical\thesis_dataset\use_wav_raw\715496123\3185811309.wav	1	1	[0.6149790883, 1.2181782722, 1.1403024197, 0.2413791865, 0.2650040388, 1.1171265841]	0.614979	1.21818	1.1403	0.241379	0.265004	1.11713
1458	567	rouhe	dx_90885118_30336400.wav	D:\hc--document\all text\P8_medical\thesis_dataset\use_wav_raw\90885118\30336400.wav	1	4	[0.9014508128, 0.0130427666, 0.2082443982, 1.4702558517, 1.068775773, 0.261565268]	0.901451	0.0130428	0.208244	1.47026	1.06878	0.261565
1459	1656	fn	dx_89810587_28365897.wav	D:\hc--document\all text\P8_medical\thesis_dataset\use_wav_raw\89810587\28365897.wav	1	1	[0.8597955108, 0.916934073, 1.0186549425, 0.2250540555, 0.5355904698, 0.9541778564]	0.859796	0.916934	1.01865	0.225054	0.53559	0.954178
1460	349	wz	cy_722924714_3357014872.wav	D:\hc--document\all text\P8_medical\thesis_dataset\use_wav_raw\722924714\3357014872.wav	1	3	[0.9587791562, 0.0710296854, 0.2138129175, 1.3612133265, 0.8748489022, 0.6455665827]	0.958779	0.0710297	0.213813	1.36121	0.874849	0.645567
1461	755	jd	cy_597113887_1781371772.wav	D:\hc--document\all text\P8_medical\thesis_dataset\use_wav_raw\597113887\1781371772.wav	1	2	[0.9818350077, 0.0559680834, 0.24560076, 1.2956163883, 0.9645409584, 0.5351122618]	0.981835	0.0559681	0.245601	1.29562	0.964541	0.535112
1462	190	general	dx_50873365_13247301.wav	D:\hc--document\all text\P8_medical\thesis_dataset\use_wav_raw\50873365\13247301.wav	1	0	[1.2139463425, 0.0645561069, 0.3732830584, 0.3367919624, 1.1792982817, 0.5337685347]	1.21395	0.0645561	0.373283	0.336792	1.1793	0.533769
1463	1053	general	cy_707200078_3016017072.wav	D:\hc--document\all text\P8_medical\thesis_dataset\use_wav_raw\707200078\3016017072.wav	1	0	[0.8757153153, 0.5886580348, 0.9851894379, 0.1630218178, 0.8745127916, 0.0]	0.875715	0.588658	0.985189	0.163022	0.874513	0
1464	1723	fn	cy_634489829_1979259980.wav	D:\hc--document\all text\P8_medical\thesis_dataset\use_wav_raw\634489829\1979259980.wav	1	1	[0.9876590371, 0.7689284086, 0.7094814777, 0.4786569178, 0.5941248536, 1.3227558136]	0.987659	0.768928	0.709481	0.478657	0.594125	1.32276
1465	1541	jd	dx_90111557_28743868.wav	D:\hc--document\all text\P8_medical\thesis_dataset\use_wav_raw\90111557\28743868.wav	1	2	[0.3685982227, 1.669095993, 1.675827384, 0.1211841106, 0.2569309771, 0.4593491852]	0.368598	1.6691	1.67583	0.121184	0.256931	0.459349
1466	1661	fn	cy_711216220_3096720056.wav	D:\hc--document\all text\P8_medical\thesis_dataset\use_wav_raw\711216220\3096720056.wav	1	1	[0.1985396296, 1.9184243679, 1.6821197271, 0.1030951589, 0.3077758551, 0.4312945604]	0.19854	1.91842	1.68212	0.103095	0.307776	0.431295
1467	603	wz	cy_721329626_3321202489.wav	D:\hc--document\all text\P8_medical\thesis_dataset\use_wav_raw\721329626\3321202489.wav	1	3	[0.8758393526, 0.0585060567, 0.267954886, 1.3093370199, 1.2446935177, 0.3269507587]	0.875839	0.0585061	0.267955	1.30934	1.24469	0.326951
1468	728	general	dx_91668902_31473080.wav	D:\hc--document\all text\P8_medical\thesis_dataset\use_wav_raw\91668902\31473080.wav	1	0	[0.5767868161, 0.7655844092, 1.2491105795, 0.1873057336, 0.3898367286, 0.2508852482]	0.576787	0.765584	1.24911	0.187306	0.389837	0.250885
1469	1378	wz	cy_720935052_3311799295.wav	D:\hc--document\all text\P8_medical\thesis_dataset\use_wav_raw\720935052\3311799295.wav	1	3	[1.0789926052, 0.0, 0.2739202678, 1.1574481726, 0.7194138765, 0.7595196366]	1.07899	0	0.27392	1.15745	0.719414	0.75952
1470	1326	general	cy_716426472_3208960217.wav	D:\hc--document\all text\P8_medical\thesis_dataset\use_wav_raw\716426472\3208960217.wav	1	0	[1.1129996777, 0.0, 0.164430961, 1.236484766, 0.5512590408, 0.6482506394]	1.113	0	0.164431	1.23648	0.551259	0.648251
1471	503	rouhe	cy_598705766_1789540730.wav	D:\hc--document\all text\P8_medical\thesis_dataset\use_wav_raw\598705766\1789540730.wav	1	4	[1.1981300116, 0.0730853453, 0.3795819879, 0.3132396042, 0.8034111261, 0.6742302179]	1.19813	0.0730853	0.379582	0.31324	0.803411	0.67423
1472	220	general	cy_671005987_2229300182.wav	D:\hc--document\all text\P8_medical\thesis_dataset\use_wav_raw\671005987\2229300182.wav	1	0	[0.2415879965, 2.0396957397, 1.6946909428, 0.1467431188, 0.2963440716, 0.4324763119]	0.241588	2.0397	1.69469	0.146743	0.296344	0.432476
1473	1042	general	cy_722490455_3346597306.wav	D:\hc--document\all text\P8_medical\thesis_dataset\use_wav_raw\722490455\3346597306.wav	1	0	[0.8844763041, 0.0788426474, 0.3367980421, 1.4929361343, 1.2783082724, 0.3505385816]	0.884476	0.0788426	0.336798	1.49294	1.27831	0.350539
1474	1011	fn	cy_722707767_3351667444.wav	D:\hc--document\all text\P8_medical\thesis_dataset\use_wav_raw\722707767\3351667444.wav	1	1	[0.2375004441, 1.9329180717, 1.6396241188, 0.1383675784, 0.2007886022, 0.5806050301]	0.2375	1.93292	1.63962	0.138368	0.200789	0.580605
1475	401	jd	dx_91260307_30140386.wav	D:\hc--document\all text\P8_medical\thesis_dataset\use_wav_raw\91260307\30140386.wav	1	2	[0.4174560905, 1.6120907068, 1.4983845949, 0.1793180406, 0.3576073945, 0.5685167313]	0.417456	1.61209	1.49838	0.179318	0.357607	0.568517
1476	1196	fn	dx_89896370_28813238.wav	D:\hc--document\all text\P8_medical\thesis_dataset\use_wav_raw\89896370\28813238.wav	1	1	[0.2205315083, 1.9033472538, 1.7565217018, 0.0585931651, 0.2055899799, 0.3516271412]	0.220532	1.90335	1.75652	0.0585932	0.20559	0.351627
1477	359	fn	cy_709984867_3072526082.wav	D:\hc--document\all text\P8_medical\thesis_dataset\use_wav_raw\709984867\3072526082.wav	1	1	[0.3578925431, 1.3600658178, 1.463385582, 0.1662722528, 0.1348945647, 0.2397667468]	0.357893	1.36007	1.46339	0.166272	0.134895	0.239767
1478	156	wz	cy_715702510_3191333679.wav	D:\hc--document\all text\P8_medical\thesis_dataset\use_wav_raw\715702510\3191333679.wav	1	3	[1.0546857119, 0.0814320445, 0.1541528255, 1.3280069828, 0.6547584534, 0.8701688647]	1.05469	0.081432	0.154153	1.32801	0.654758	0.870169
1479	307	fn	cy_720239471_3296791923.wav	D:\hc--document\all text\P8_medical\thesis_dataset\use_wav_raw\720239471\3296791923.wav	1	1	[0.3268790841, 1.7387531996, 1.6321314573, 0.0790403783, 0.2536377609, 0.3093136847]	0.326879	1.73875	1.63213	0.0790404	0.253638	0.309314
1480	679	fn	cy_715406917_3183550233.wav	D:\hc--document\all text\P8_medical\thesis_dataset\use_wav_raw\715406917\3183550233.wav	1	1	[1.1936997175, 0.0538458899, 0.4348502159, 0.2083368897, 1.3675377369, 0.2819581926]	1.1937	0.0538459	0.43485	0.208337	1.36754	0.281958
1481	1730	general	cy_677202161_2359646414.wav	D:\hc--document\all text\P8_medical\thesis_dataset\use_wav_raw\677202161\2359646414.wav	1	0	[0.7357546687, 0.6365625262, 1.1203145981, 0.228346467, 0.4887860119, 0.3542013466]	0.735755	0.636563	1.12031	0.228346	0.488786	0.354201
1482	1012	rouhe	dx_87259235_25174057.wav	D:\hc--document\all text\P8_medical\thesis_dataset\use_wav_raw\87259235\25174057.wav	1	4	[1.0562901497, 0.0202917513, 0.3247006238, 0.9980970025, 1.3665106297, 0.2054792494]	1.05629	0.0202918	0.324701	0.998097	1.36651	0.205479
1483	618	general	cy_707545196_3023137158.wav	D:\hc--document\all text\P8_medical\thesis_dataset\use_wav_raw\707545196\3023137158.wav	1	0	[1.1620891094, 0.0, 0.3410957754, 0.3341833651, 1.2396583557, 0.4056408107]	1.16209	0	0.341096	0.334183	1.23966	0.405641
1484	1727	jd	cy_711325466_3098775244.wav	D:\hc--document\all text\P8_medical\thesis_dataset\use_wav_raw\711325466\3098775244.wav	1	2	[1.1253321171, 0.0, 0.1111342162, 1.2483021021, 0.4469362795, 0.723533392]	1.12533	0	0.111134	1.2483	0.446936	0.723533
1485	1535	rouhe	cy_715747948_3190702805.wav	D:\hc--document\all text\P8_medical\thesis_dataset\use_wav_raw\715747948\3190702805.wav	1	4	[0.9410330653, 0.1007336602, 0.2744666934, 1.2630286217, 1.3569477797, 0.1849402636]	0.941033	0.100734	0.274467	1.26303	1.35695	0.18494
1486	1264	general	cy_678653143_2391128412.wav	D:\hc--document\all text\P8_medical\thesis_dataset\use_wav_raw\678653143\2391128412.wav	1	0	[1.2549450397, 0.1001529768, 0.3533760309, 0.2206741869, 1.2873444557, 0.3834886253]	1.25495	0.100153	0.353376	0.220674	1.28734	0.383489
[truncated: 109 more rows]
