# Supplementary material for: Tone classification of online medical services based on 1DCNN-BiLSTM
Source: PeerJ journal article supplement (doi:10.7717/peerj-cs.2325), 2024-09-23
Supplement: Supplemental_Articles_S3.pdf [file Supplemental_Articles_S3.pdf]

# 医疗专业化服务者语气类型调查问卷

感谢您参与医生语气重要性和显著性的甄别调查。本问卷所采集数据用于科学研究，不收集个人隐私数据，请放心填写。所有问题没有对错之分，请您根据您的真实想法填写。

1. 您是否使用过在线医疗问诊服务（如好大夫在线、微医、春雨医生、寻医问药网和丁香园等平台等）？ [单选题] \*

- 使用过在线问诊，并且接受过医生采用的语音服务（如医生通过发送语音、打电话、视频聊天等与我交流）
- 使用过在线问诊，但是医生没有采用过语音形式与我交流（如，只采用文本交流的模式）
- 没有使用过在线问诊，但是我去过线下医院看病

“语气”是指声音的韵律变化所表现出的交流方式，独立于谈话内容。因此，请根据您印象中医生声音特征（而非话语文本内容）判断他们的语气。

2. 结合我参与过的线下医院问诊经历，我明显能感受到医生的哪些语气？ [多选题] \*

- |                                   |                                                    |
|-----------------------------------|----------------------------------------------------|
| <input type="checkbox"/> 有压力（焦虑）的 | <input type="checkbox"/> 愤怒的                       |
| <input type="checkbox"/> 同情的      | <input type="checkbox"/> 稳重的                       |
| <input type="checkbox"/> 坚定的      | <input type="checkbox"/> 主导（支配）的                   |
| <input type="checkbox"/> 温柔的      | <input type="checkbox"/> 专注的                       |
| <input type="checkbox"/> 真诚的      | <input type="checkbox"/> 满足的                       |
| <input type="checkbox"/> 感兴趣的     | <input type="checkbox"/> 其他（可写多个，请用顿号分隔）<br>_____* |

3. 结合我参与过的在线问诊经历，我明显能感受到医生的哪些语气？ [多选题] \*

- |                                   |                                                    |
|-----------------------------------|----------------------------------------------------|
| <input type="checkbox"/> 有压力（焦虑）的 | <input type="checkbox"/> 愤怒的                       |
| <input type="checkbox"/> 同情的      | <input type="checkbox"/> 稳重的                       |
| <input type="checkbox"/> 坚定的      | <input type="checkbox"/> 主导（支配）的                   |
| <input type="checkbox"/> 温柔的      | <input type="checkbox"/> 专注的                       |
| <input type="checkbox"/> 真诚的      | <input type="checkbox"/> 满足的                       |
| <input type="checkbox"/> 感兴趣的     | <input type="checkbox"/> 其他（可写多个，请用顿号分隔）<br>_____* |

4. 结合我参与过的线下医院问诊经历，医生什么样的语气会严重影响到（增加或减少）我对医生服务的满意度判断。 [多选题] \*

- |                                   |                                          |
|-----------------------------------|------------------------------------------|
| <input type="checkbox"/> 有压力（焦虑）的 | <input type="checkbox"/> 愤怒的             |
| <input type="checkbox"/> 同情的      | <input type="checkbox"/> 稳重的             |
| <input type="checkbox"/> 坚定的      | <input type="checkbox"/> 主导（支配）的         |
| <input type="checkbox"/> 温柔的      | <input type="checkbox"/> 专注的             |
| <input type="checkbox"/> 真诚的      | <input type="checkbox"/> 满足的             |
| <input type="checkbox"/> 感兴趣的     | <input type="checkbox"/> 其他（可写多个，请用顿号分隔） |

\_\_\_\_\_\*

5. 结合我参与过的在线问诊经历，医生什么样的语气会严重影响到（增加或减少）我对医生服务的满意度判断。 [多选题] \*

- |                                   |                                          |
|-----------------------------------|------------------------------------------|
| <input type="checkbox"/> 有压力（焦虑）的 | <input type="checkbox"/> 愤怒的             |
| <input type="checkbox"/> 同情的      | <input type="checkbox"/> 稳重的             |
| <input type="checkbox"/> 坚定的      | <input type="checkbox"/> 主导（支配）的         |
| <input type="checkbox"/> 温柔的      | <input type="checkbox"/> 专注的             |
| <input type="checkbox"/> 真诚的      | <input type="checkbox"/> 满足的             |
| <input type="checkbox"/> 感兴趣的     | <input type="checkbox"/> 其他（可写多个，请用顿号分隔） |

\_\_\_\_\_\*

6. 您的性别 [单选题] \*

- 男
- 女

7. 您的年龄

[输入10(10岁)到70(70岁)的数字]\*

8. 您的文化程度 [单选题] \*

- 初中及以下
- 高中、中专
- 大专
- 本科
- 硕士及以上

9. 您找（线上和线下合计）医生就诊、咨询的频次接近于？ [单选题] \*

- 每周一次
- 每半月一次
- 每月一次
- 每两月一次
- 每半年一次
- 一年一次
- 一年以上一次

10. 根据您的看法，对下面表述进行打分，分值越高表示越赞成。1~5 分依次表示从“非常不赞成”~“非常赞成”。 [矩阵量表题] \*

|               | 非常不赞成                 | 比较不赞成                 | 一般赞成                  | 比较赞成                  | 非常赞成                  |
|---------------|-----------------------|-----------------------|-----------------------|-----------------------|-----------------------|
| 医生往往是权威的      | <input type="radio"/> | <input type="radio"/> | <input type="radio"/> | <input type="radio"/> | <input type="radio"/> |
| 医生往往是专业的      | <input type="radio"/> | <input type="radio"/> | <input type="radio"/> | <input type="radio"/> | <input type="radio"/> |
| 医生往往是温暖的      | <input type="radio"/> | <input type="radio"/> | <input type="radio"/> | <input type="radio"/> | <input type="radio"/> |
| 医生往往是共情的      | <input type="radio"/> | <input type="radio"/> | <input type="radio"/> | <input type="radio"/> | <input type="radio"/> |
| 医生往往以病人为中心的   | <input type="radio"/> | <input type="radio"/> | <input type="radio"/> | <input type="radio"/> | <input type="radio"/> |
| 医生往往只关注于疾病本身  | <input type="radio"/> | <input type="radio"/> | <input type="radio"/> | <input type="radio"/> | <input type="radio"/> |
| 医生往往是值得信赖的    | <input type="radio"/> | <input type="radio"/> | <input type="radio"/> | <input type="radio"/> | <input type="radio"/> |
| 医生往往忽视对我情绪的安抚 | <input type="radio"/> | <input type="radio"/> | <input type="radio"/> | <input type="radio"/> | <input type="radio"/> |

再次感谢您的参与！
